# Supplementary material
Source: publisher figshare collection journal article supplement (https://gsajournals.figshare.com/articles/dataset/_/13635110)
Supplement: Supplementary file 1 [file 1]

## Sheet: 27547
Gene/Clone ID	Gene/Clone Name	ChromosomeNumber	NucleotidePosition	CGH-array	CGH-array	CGH-array	CGH-array			Gene/Clone ID	ChromosomeNumber	NucleotidePosition
Class Label				NN	NN	Disease	Disease
Sample Label				8x15k control 1	agilent 8x15 k control 2	1a wt #1 vs PSL2	1a wt #2 vs PSL2
A_75_P01000003		1	48	0.9	0.72	0.48	-0.14			A_75_P01000003	1	48
A_75_P01000148		1	1516	0.57	0.39	0.35	0.24			A_75_P01000148	1	1516
A_75_P01000289		1	2997	-0.14	-0.36	-1.35	-0.84			A_75_P01000289	1	2997
A_75_P01000360		1	3736	-0.1	-0.03	0.33	-0.01			A_75_P01000360	1	3736
A_75_P01000410		1	4229	-0.17	-0.08	0.59	0.02			A_75_P01000410	1	4229
A_75_P01000473		1	4857	0.06	-0.06	0.21	0.24			A_75_P01000473	1	4857
A_75_P01000549		1	5626	-0.2	0.02	0.23	0.04			A_75_P01000549	1	5626
A_75_P01000600		1	6146	-0.03	-0.09	-0.53	-0.13			A_75_P01000600	1	6146
A_75_P01000684		1	6973	-0.18	-0.17	0.04	0.41			A_75_P01000684	1	6973
A_75_P01000762		1	7748	-0.05	-0.13	0.01	0.02			A_75_P01000762	1	7748
A_75_P01000835		1	8471	-0.08	-0.03	0	-0.18			A_75_P01000835	1	8471
A_75_P01000898		1	9065	-0.06	-0.09	0.22	-0.07			A_75_P01000898	1	9065
A_75_P01000951		1	9582	-0.33	-0.13	0.28	-0.04			A_75_P01000951	1	9582
A_75_P01000967		1	9737	-0.07	0.05	-1.55	-1.2			A_75_P01000967	1	9737
A_75_P01001017		1	10241	0.28	0.24	-0.84	-0.27			A_75_P01001017	1	10241
A_75_P01001106		1	11079	-0.07	0.13	-0.55	-0.21			A_75_P01001106	1	11079
A_75_P01001161		1	11599	-0.16	-0.09	-0.73	-0.41			A_75_P01001161	1	11599
A_75_P01001343		1	13480	0.31	0.24	-0.02	-0.36			A_75_P01001343	1	13480
A_75_P01001457		1	14632	-0.34	-0.24	-1.07	-0.41			A_75_P01001457	1	14632
A_75_P01001643		1	16454	-0.22	-0.23	-0.72	-0.66			A_75_P01001643	1	16454
A_75_P01001747		1	17518	0.15	-0.01	-0.17	-0.35			A_75_P01001747	1	17518
A_75_P01001967		1	19765	0.06	0.06	-1.32	-1.11			A_75_P01001967	1	19765
A_75_P01002230		1	22516	0.07	-0.04	-0.13	-0.28			A_75_P01002230	1	22516
A_75_P01002684		1	27166	0.55	0.43	-0.33	-0.05			A_75_P01002684	1	27166
A_75_P01002757		1	27935	0.02	0.18	-0.15	0.4			A_75_P01002757	1	27935
A_75_P01002834		1	28686	-0.03	-0.18	-0.72	-0.1			A_75_P01002834	1	28686
A_75_P01002852		1	28855	0.19	0.2	-0.42	-0.06			A_75_P01002852	1	28855
A_75_P01002903		1	29351	-0.16	-0.01	-0.12	-0.05			A_75_P01002903	1	29351
A_75_P01002980		1	30166	-0.01	0.07	0.45	0.01			A_75_P01002980	1	30166
A_75_P01003050		1	30873	-0.07	-0.06	-0.91	-0.1			A_75_P01003050	1	30873
A_75_P01003094		1	31327	-0.15	-0.01	0.3	0.33			A_75_P01003094	1	31327
A_75_P01003172		1	32163	-0.01	-0.07	-0.98	-0.13			A_75_P01003172	1	32163
A_75_P01003241		1	32929	0.21	0.2	0.57	0.36			A_75_P01003241	1	32929
A_75_P01003291		1	33457	0.02	0.03	0.68	0.17			A_75_P01003291	1	33457
A_75_P01003372		1	34340	-0.15	-0.24	-0.15	-0.31			A_75_P01003372	1	34340
A_75_P01003435		1	34992	0.22	0.12	0.44	0.1			A_75_P01003435	1	34992
A_75_P01003488		1	35595	0.24	0.16	-0.01	0.21			A_75_P01003488	1	35595
A_75_P01003548		1	36219	0.13	-0.01	-2.04	-1.25			A_75_P01003548	1	36219
A_75_P01003648		1	37207	-0.28	-0.28	-0.78	-0.01			A_75_P01003648	1	37207
A_75_P01003669		1	37408	0.12	0.12	-1.16	-1.08			A_75_P01003669	1	37408
A_75_P01003714		1	37857	-0.06	-0.07	-0.09	0.42			A_75_P01003714	1	37857
A_75_P01003776		1	38497	0.28	0.22	0.37	-0.21			A_75_P01003776	1	38497
A_75_P01003833		1	39096	0	-0.03	-0.44	0.08			A_75_P01003833	1	39096
A_75_P01003908		1	39844	-0.51	-0.18	-0.06	0.14			A_75_P01003908	1	39844
A_75_P01003958		1	40358	-0.18	-0.13	0.09	0.07			A_75_P01003958	1	40358
A_75_P01004042		1	41229	-0.31	-0.13	-1.14	-0.56			A_75_P01004042	1	41229
A_75_P01004134		1	42180	-0.23	-0.32	0.28	0.02			A_75_P01004134	1	42180
A_75_P01004182		1	42678	0.12	0.17	-0.58	-0.42			A_75_P01004182	1	42678
A_75_P01004232		1	43205	0.18	0.12	-0.06	0.34			A_75_P01004232	1	43205
A_75_P01004303		1	43934	-0.07	0.03	0.04	-0.46			A_75_P01004303	1	43934
A_75_P01004374		1	44697	-0.24	-0.3	0.18	0.2			A_75_P01004374	1	44697
A_75_P01004422		1	45244	-0.24	-0.2	0.03	0.03			A_75_P01004422	1	45244
A_75_P01004446		1	45500	0.1	0.12	0.5	0.29			A_75_P01004446	1	45500
A_75_P01004507		1	46151	-0.11	0.02	0.18	-0.07			A_75_P01004507	1	46151
A_75_P01004559		1	46773	0.21	0.12	0.39	0.14			A_75_P01004559	1	46773
A_75_P01004639		1	47567	0.25	0.3	-0.47	-0.28			A_75_P01004639	1	47567
A_75_P01004694		1	48146	0.31	0.32	-0.1	-0.17			A_75_P01004694	1	48146
A_75_P01004751		1	48710	-0.18	0.05	0.18	0			A_75_P01004751	1	48710
A_75_P01004826		1	49446	0.24	0.33	-0.98	-0.1			A_75_P01004826	1	49446
A_75_P01004925		1	50476	-0.04	-0.04	0.21	0.7			A_75_P01004925	1	50476
A_75_P01004994		1	51176	-0.1	-0.21	-0.13	-0.32			A_75_P01004994	1	51176
A_75_P01005043		1	51691	-0.52	-0.34	-0.23	-0.06			A_75_P01005043	1	51691
A_75_P01005106		1	52376	-0.13	-0.09	-0.15	0.12			A_75_P01005106	1	52376
A_75_P01005194		1	53254	0.15	0.27	0.6	0.19			A_75_P01005194	1	53254
A_75_P01005256		1	53873	0.13	0.13	0.1	-0.11			A_75_P01005256	1	53873
A_75_P01005273		1	54057	0.33	0.28	-0.98	-0.42			A_75_P01005273	1	54057
A_75_P01005307		1	54427	0.01	0.05	0.12	0.04			A_75_P01005307	1	54427
A_75_P01005387		1	55267	0.16	0.13	-0.61	-0.15			A_75_P01005387	1	55267
A_75_P01005482		1	56231	-0.29	-0.25	-0.91	0.25			A_75_P01005482	1	56231
A_75_P01005558		1	56986	-0.18	0	0.05	0.19			A_75_P01005558	1	56986
A_75_P01005623		1	57667	-0.13	0.16	0.35	0.26			A_75_P01005623	1	57667
A_75_P01005701		1	58458	0.36	0.28	-0.2	0.35			A_75_P01005701	1	58458
A_75_P01005779		1	59254	0.37	0.36	0.02	0.09			A_75_P01005779	1	59254
A_75_P01005867		1	60185	-0.17	-0.19	-0.8	-0.75			A_75_P01005867	1	60185
A_75_P01005908		1	60674	-0.16	-0.1	-0.27	-0.27			A_75_P01005908	1	60674
A_75_P01005989		1	61510	0.13	0.12	0.26	0.02			A_75_P01005989	1	61510
A_75_P01006058		1	62223	0.3	0.28		-1.02			A_75_P01006058	1	62223
A_75_P01006106		1	62719	0.11	0.03	-0.06	-0.22			A_75_P01006106	1	62719
A_75_P01006136		1	62995	-0.05	-0.16	-0.8	-0.53			A_75_P01006136	1	62995
A_75_P01006194		1	63564	0.24	0.06	0.29	-0.01			A_75_P01006194	1	63564
A_75_P01006253		1	64205	-0.19	-0.14	-0.33	-0.25			A_75_P01006253	1	64205
A_75_P01006312		1	64813	0.25	0.26	-0.3	0.37			A_75_P01006312	1	64813
A_75_P01006370		1	65447	0.24	0.16	-0.5	-0.37			A_75_P01006370	1	65447
A_75_P01006455		1	66305	-0.12	0.02	0.05	-0.06			A_75_P01006455	1	66305
A_75_P01006520		1	66901	0.03	-0.02	-0.11	0.61			A_75_P01006520	1	66901
A_75_P01006590		1	67605	-0.1	-0.04	0.22	0.1			A_75_P01006590	1	67605
A_75_P01006657		1	68291	-0.37	0.45	0.51	0.08			A_75_P01006657	1	68291
A_75_P01006713		1	68863	0.43	0.33	0.15	-0.21			A_75_P01006713	1	68863
A_75_P01006754		1	69346	0.58	0.55	0.2	-0.03			A_75_P01006754	1	69346
A_75_P01006814		1	69987	0.24	0.21	-0.24	-0.31			A_75_P01006814	1	69987
A_75_P01006869		1	70564	-0.22	-0.25	0	0.35			A_75_P01006869	1	70564
A_75_P01006887		1	70747	0.15	0.06	-0.49	0.01			A_75_P01006887	1	70747
A_75_P01006941		1	71286	0.23	0.19	-0.23	-0.38			A_75_P01006941	1	71286
A_75_P01006992		1	71774	-0.24	-0.34	-0.07	0.03			A_75_P01006992	1	71774
A_75_P01007061		1	72479	0.05	-0.09	-1	-0.79			A_75_P01007061	1	72479
A_75_P01007136		1	73253	-0.09	-0.03	-1.17	0.12			A_75_P01007136	1	73253
A_75_P01007193		1	73812	-0.32	0.03	0.18	0.29			A_75_P01007193	1	73812
A_75_P01007246		1	74322	0.16	0.07	-0.6	-0.94			A_75_P01007246	1	74322
A_75_P01007303		1	74931	-0.44	-0.36	0.36	0.43			A_75_P01007303	1	74931
A_75_P01007380		1	75677	-0.01	-0.06	-0.92	-0.81			A_75_P01007380	1	75677
A_75_P01007453		1	76420	-0.14	-0.08	0.02	-0.18			A_75_P01007453	1	76420
A_75_P01007517		1	77036	-0.37	-0.38	-0.44	-0.24			A_75_P01007517	1	77036
A_75_P01007598		1	77886	0.11	-0.01	-0.32	-0.02			A_75_P01007598	1	77886
A_75_P01007681		1	78725	-0.08	-0.14	0.11	-0.08			A_75_P01007681	1	78725
A_75_P01007705		1	78983	-0.11	0.08	0.22	0.24			A_75_P01007705	1	78983
A_75_P01007739		1	79338	-0.05	-0.02	0.2	0.25			A_75_P01007739	1	79338
A_75_P01007826		1	80173	-0.13	-0.32	-1.2	-0.68			A_75_P01007826	1	80173
A_75_P01007896		1	80866	-0.17	-0.26	0.04	0.13			A_75_P01007896	1	80866
A_75_P01007975		1	81714	0.5	0.37	-0.78	-0.38			A_75_P01007975	1	81714
A_75_P01008053		1	82551	0.15	0.08	-0.39	-0.13			A_75_P01008053	1	82551
A_75_P01008107		1	83113	0.16	0.17	-1.01	-0.7			A_75_P01008107	1	83113
A_75_P01008163		1	83738	0.43	0.31	-0.49	-0.01			A_75_P01008163	1	83738
A_75_P01008264		1	84738	0.38	0.37	0.11	-0.19			A_75_P01008264	1	84738
A_75_P01008324		1	85383	-0.04	0.07	0.08	0.07			A_75_P01008324	1	85383
A_75_P01008405		1	86188	0.08	0.1	0.48	-0.17			A_75_P01008405	1	86188
A_75_P01008487		1	87046	0.14	0.22	-0.72	-0.96			A_75_P01008487	1	87046
A_75_P01008548		1	87671	0.54	0.51	-0.12	0.08			A_75_P01008548	1	87671
A_75_P01008580		1	87976	0.13	0.24	-0.42	-0.41			A_75_P01008580	1	87976
A_75_P01008616		1	88334	-0.06	0.24	0.29	0.55			A_75_P01008616	1	88334
A_75_P01008737		1	89566	0.45	0.36	0.39	0.08			A_75_P01008737	1	89566
A_75_P01008821		1	90379	0.33	0.41	-0.22	0.05			A_75_P01008821	1	90379
A_75_P01008902		1	91203	0.12	0.13	-0.39	-0.62			A_75_P01008902	1	91203
A_75_P01008977		1	91958	0.27	0.39	-0.47	-0.6			A_75_P01008977	1	91958
A_75_P01009040		1	92630	-0.45	-0.52	0.11	0.61			A_75_P01009040	1	92630
A_75_P01009120		1	93423	0	0.11	-0.23	-0.12			A_75_P01009120	1	93423
A_75_P01009207		1	94357	-0.22	-0.33	0.21	0.09			A_75_P01009207	1	94357
A_75_P01009287		1	95127	0.17	0.03	0	-0.36			A_75_P01009287	1	95127
A_75_P01009385		1	96055	-0.23	-0.35	0.05	-0.03			A_75_P01009385	1	96055
A_75_P01009463		1	96844	0.16	0.11	-0.62	0.03			A_75_P01009463	1	96844
A_75_P01009497		1	97199	0.01	0.09	0	0.2			A_75_P01009497	1	97199
A_75_P01009557		1	97746	0.18	0.27	0.18	0.44			A_75_P01009557	1	97746
A_75_P01009643		1	98627	0.03	0.18	-0.47	-0.27			A_75_P01009643	1	98627
A_75_P01009709		1	99313	-0.12	-0.25	0.44	0.16			A_75_P01009709	1	99313
A_75_P01009766		1	99880	-0.2	0.01	-0.39	-0.26			A_75_P01009766	1	99880
A_75_P01009850		1	100758	-0.07	-0.17	0.24	0.3			A_75_P01009850	1	100758
A_75_P01009938		1	101656	-0.24	-0.15	-0.03	0.04			A_75_P01009938	1	101656
A_75_P01010006		1	102334	0.13	0.21	-0.28	-0.45			A_75_P01010006	1	102334
A_75_P01010101		1	103308	-0.18	-0.35	-0.07	-0.11			A_75_P01010101	1	103308
A_75_P01010184		1	104104	-0.06	-0.04	0.01	0.12			A_75_P01010184	1	104104
A_75_P01010278		1	105018	0.46	0.5	0.1	0.05			A_75_P01010278	1	105018
A_75_P01010336		1	105621	-0.36	-0.09	0.18	0.07			A_75_P01010336	1	105621
A_75_P01010404		1	106309	0.15	0.09	0.31	0.14			A_75_P01010404	1	106309
A_75_P01010421		1	106502	0.21	0.19	-0.7	-0.15			A_75_P01010421	1	106502
A_75_P01010487		1	107150	0.07	-0.03	-0.39	0.19			A_75_P01010487	1	107150
A_75_P01010528		1	107577	0.14	0.16	-0.07	-0.11			A_75_P01010528	1	107577
A_75_P01010577		1	108086	-0.14	-0.17	-0.55	-0.51			A_75_P01010577	1	108086
A_75_P01010628		1	108616	-0.05	-0.16	-0.05	0.13			A_75_P01010628	1	108616
A_75_P01010695		1	109359	-0.07	-0.11	-0.35	-0.37			A_75_P01010695	1	109359
A_75_P01010777		1	110204	0.15	0.2	0.43	0.56			A_75_P01010777	1	110204
A_75_P01010837		1	110836	0.17	0.28	0.6	0.1			A_75_P01010837	1	110836
A_75_P01010899		1	111446	0.08	0.02	-0.2	0.05			A_75_P01010899	1	111446
A_75_P01010953		1	112001	-0.56	-0.34	-1.64	0.12			A_75_P01010953	1	112001
A_75_P01011016		1	112637	-0.15	-0.09	0.32	0.58			A_75_P01011016	1	112637
A_75_P01011086		1	113326	0.2	0.29	0.11	-0.02			A_75_P01011086	1	113326
A_75_P01011144		1	113932	0.36	0.36	0.49	0			A_75_P01011144	1	113932
A_75_P01011170		1	114228	0.16	0.11		-1.88			A_75_P01011170	1	114228
A_75_P01011203		1	114597	0.41	0.31	-0.37	-0.25			A_75_P01011203	1	114597
A_75_P01011255		1	115197	0.19	0.32	-0.32	0.13			A_75_P01011255	1	115197
A_75_P01011306		1	115733	-0.1	0.27	0.18	0.12			A_75_P01011306	1	115733
A_75_P01011384		1	116505	0.47	0.33	-0.49	-0.74			A_75_P01011384	1	116505
A_75_P01011460		1	117274	-0.23	-0.23	-0.22	-0.04			A_75_P01011460	1	117274
A_75_P01011539		1	117995	0.42	0.46	0.29	0.06			A_75_P01011539	1	117995
A_75_P01011595		1	118600	-0.11	-0.18	0.31	0.18			A_75_P01011595	1	118600
A_75_P01011666		1	119266	0.09	0.15	-0.01	-0.07			A_75_P01011666	1	119266
A_75_P01011748		1	120059	0.14	0.19	-0.23	-0.3			A_75_P01011748	1	120059
A_75_P01011809		1	120671	-0.19	-0.33	-0.06	0.14			A_75_P01011809	1	120671
A_75_P01011863		1	121242	-0.23	-0.26	-0.81	-0.97			A_75_P01011863	1	121242
A_75_P01011938		1	121957	-0.12	-0.12	-0.61	-0.23			A_75_P01011938	1	121957
A_75_P01011965		1	122237	0.32	0.15	0.32	0			A_75_P01011965	1	122237
A_75_P01011999		1	122586	-0.32	-0.15	0.42	0.39			A_75_P01011999	1	122586
A_75_P01012099		1	123537	-0.04	-0.05	0.17	0.22			A_75_P01012099	1	123537
A_75_P01012160		1	124182	0.16	0.22	0.27	-0.06			A_75_P01012160	1	124182
A_75_P01012229		1	124839	-0.04	-0.08	-0.63	-0.77			A_75_P01012229	1	124839
A_75_P01012314		1	125694	0.11	0.06	-0.85	-1.03			A_75_P01012314	1	125694
A_75_P01012393		1	126524	-0.11	0.1	-0.18	0.11			A_75_P01012393	1	126524
A_75_P01012490		1	127508	-0.01	-0.19	-0.11	0.33			A_75_P01012490	1	127508
A_75_P01012556		1	128196	-0.2	-0.16	0.32	0.42			A_75_P01012556	1	128196
A_75_P01012606		1	128709	0.12	0.18	0.06	-0.35			A_75_P01012606	1	128709
A_75_P01012681		1	129523	-0.01	-0.04	-0.57	-0.37			A_75_P01012681	1	129523
A_75_P01012739		1	130157	0.12	0.36	0.18	0			A_75_P01012739	1	130157
A_75_P01012796		1	130727	0.2	0.09		-1.28			A_75_P01012796	1	130727
A_75_P01012813		1	130910	0.01	-0.24	-0.62	-0.21			A_75_P01012813	1	130910
A_75_P01012852		1	131344	0.08	0.12	0.14	0.12			A_75_P01012852	1	131344
A_75_P01012926		1	132118	-0.08	-0.02	-0.24	-0.44			A_75_P01012926	1	132118
A_75_P01013008		1	132979	0.3	0.32	-0.61	-1.04			A_75_P01013008	1	132979
A_75_P01013066		1	133565	0.24	0.19	-1.62	-0.92			A_75_P01013066	1	133565
A_75_P01013159		1	134556	0.06	0.13	0.02	-0.53			A_75_P01013159	1	134556
A_75_P01013246		1	135426	0.32	0.16	0.12	-0.25			A_75_P01013246	1	135426
A_75_P01013311		1	136112	0.01	-0.01	0.04	-0.1			A_75_P01013311	1	136112
A_75_P01013363		1	136645	-0.26	-0.14	0.13	-0.41			A_75_P01013363	1	136645
A_75_P01013415		1	137199	0.44	0.42	0.39	0.15			A_75_P01013415	1	137199
A_75_P01013483		1	137857	0.32	0.29	0.13	-0.07			A_75_P01013483	1	137857
A_75_P01013565		1	138668	-0.06	-0.08		-1.57			A_75_P01013565	1	138668
A_75_P01013621		1	139288	-0.07	-0.05	-0.21	0.16			A_75_P01013621	1	139288
A_75_P01013634		1	139438	0.08	0.09	-1.03	-0.99			A_75_P01013634	1	139438
A_75_P01013705		1	140134	-0.14	-0.16	-0.3	0.01			A_75_P01013705	1	140134
A_75_P01013842		1	141556	0.1	0.16	0.32	-0.02			A_75_P01013842	1	141556
A_75_P01013926		1	142436	0.21	0.2	-0.74	0.42			A_75_P01013926	1	142436
A_75_P01014006		1	143256	-0.08	-0.07	0.07	0.19			A_75_P01014006	1	143256
A_75_P01014070		1	143904	0	0.08	0.1	-0.15			A_75_P01014070	1	143904
A_75_P01014137		1	144582	-0.12	-0.23	-0.36	-0.19			A_75_P01014137	1	144582
A_75_P01014209		1	145221	-0.53	-0.23	-0.24	-0.12			A_75_P01014209	1	145221
A_75_P01014290		1	145992	-0.12	-0.08	-0.4	-0.99			A_75_P01014290	1	145992
A_75_P01014379		1	146912	-0.04	0	-0.34	0.28			A_75_P01014379	1	146912
A_75_P01014459		1	147714	0.04	-0.07	-0.74	-0.22			A_75_P01014459	1	147714
A_75_P01014512		1	148227	0.43	0.36	0.27	0.49			A_75_P01014512	1	148227
A_75_P01014602		1	149140	0.31	0.36	0.3	-0.04			A_75_P01014602	1	149140
A_75_P01014623		1	149317	0.02	0.03	-0.17	-0.13			A_75_P01014623	1	149317
A_75_P01014660		1	149713	-0.24	0.15	0.3	0.6			A_75_P01014660	1	149713
A_75_P01014722		1	150340	0.21	0.16	-0.9	-0.64			A_75_P01014722	1	150340
A_75_P01014782		1	150964	0.04	-0.03	0.16	0.12			A_75_P01014782	1	150964
A_75_P01014837		1	151546	0.24	0.16	0.17	0.24			A_75_P01014837	1	151546
A_75_P01014916		1	152366	-0.16	-0.21	0.07	0.22			A_75_P01014916	1	152366
A_75_P01015021		1	153409	-0.2	-0.24	-0.26	-0.08			A_75_P01015021	1	153409
A_75_P01015100		1	154240	-0.16	0.13	0.01	0.11			A_75_P01015100	1	154240
A_75_P01015170		1	154956	0.24	0.23	0.3	0.45			A_75_P01015170	1	154956
A_75_P01015222		1	155481	0.01	-0.11	-0.79	-0.67			A_75_P01015222	1	155481
A_75_P01015299		1	156232	0.1	0.05	-1.9	-1.17			A_75_P01015299	1	156232
A_75_P01015375		1	156971	-0.13	0.17	0.21	0.17			A_75_P01015375	1	156971
A_75_P01015460		1	157766	-0.05	-0.22	0.32	0.09			A_75_P01015460	1	157766
A_75_P01015478		1	157944	0.37	0.41	0.16	0.28			A_75_P01015478	1	157944
A_75_P01015514		1	158325	0	0.1	0.04	0.27			A_75_P01015514	1	158325
A_75_P01015598		1	159128	-0.19	-0.29	-0.82	-0.94			A_75_P01015598	1	159128
A_75_P01015685		1	160004	-0.22	-0.37	-0.9	-0.64			A_75_P01015685	1	160004
A_75_P01016350		1	166406	0.07	0.21	-0.67	-0.22			A_75_P01016350	1	166406
A_75_P01016402		1	166934	0.28	0.28	0.23	0.03			A_75_P01016402	1	166934
A_75_P01016479		1	167710	-0.04	-0.05	-0.19	-0.1			A_75_P01016479	1	167710
A_75_P01016543		1	168332	0.16	0.2	0.1	0.2			A_75_P01016543	1	168332
A_75_P01016637		1	169276	0.01	-0.09	0.02	-0.22			A_75_P01016637	1	169276
A_75_P01016722		1	170117	0.07	0.09	-0.03	0.29			A_75_P01016722	1	170117
A_75_P01016782		1	170716	0.04	-0.02	-0.08	-0.39			A_75_P01016782	1	170716
A_75_P01016858		1	171474	0.29	0.21	0.19	0.36			A_75_P01016858	1	171474
A_75_P01016917		1	172079	-0.37	-0.42	-1.09	-0.81			A_75_P01016917	1	172079
A_75_P01016945		1	172342	-0.15	-0.1	0.37	-0.14			A_75_P01016945	1	172342
A_75_P01017006		1	172912	0.02	0.07	0.27	0.5			A_75_P01017006	1	172912
A_75_P01017077		1	173619	0.18	0.11	-0.6	-0.43			A_75_P01017077	1	173619
A_75_P01017149		1	174351	-0.1	-0.03	-0.37	-0.43			A_75_P01017149	1	174351
A_75_P01017220		1	175099	0.17	0.21	0.14	-0.04			A_75_P01017220	1	175099
A_75_P01017426		1	177113	0.27	0.16	-0.63	-1.06			A_75_P01017426	1	177113
A_75_P01017491		1	177719	0.2	0.2	-1.1	-0.36			A_75_P01017491	1	177719
A_75_P01017567		1	178467	-0.03	0.02	-0.83	-0.97			A_75_P01017567	1	178467
A_75_P01017638		1	179160	0.3	0.19		-1.61			A_75_P01017638	1	179160
A_75_P01017697		1	179758	-0.25	-0.29	-0.33	-0.33			A_75_P01017697	1	179758
A_75_P01017778		1	180536	-0.18	0	-0.01	-0.03			A_75_P01017778	1	180536
A_75_P01017829		1	181067	-0.16	-0.1	-0.09	-0.15			A_75_P01017829	1	181067
A_75_P01017854		1	181321	-0.08	-0.05	-0.89	-0.56			A_75_P01017854	1	181321
A_75_P01017893		1	181679	0.1	0.12	0.62	0.3			A_75_P01017893	1	181679
A_75_P01017968		1	182441	-0.21	-0.06	-0.02	0.48			A_75_P01017968	1	182441
A_75_P01018077		1	183527	0.25	0.33	-1.23	-1.25			A_75_P01018077	1	183527
A_75_P01018147		1	184210	-0.28	-0.14	-0.77	-0.51			A_75_P01018147	1	184210
A_75_P01018250		1	185284	0.13	0.17	-0.21	-0.42			A_75_P01018250	1	185284
A_75_P01018311		1	185903	0.04	0.11	-0.4	-0.36			A_75_P01018311	1	185903
A_75_P01018388		1	186672	0.04	-0.02	0.14	-0.12			A_75_P01018388	1	186672
A_75_P01018460		1	187397	0.27	0.15	-1.26	-1.38			A_75_P01018460	1	187397
A_75_P01018544		1	188329	0.18	0.06	0.08	0.1			A_75_P01018544	1	188329
A_75_P01018714		1	190077	0.28	0.26	0.17	-0.04			A_75_P01018714	1	190077
A_75_P01018781		1	190830	0.25	0.18	-0.42	-0.3			A_75_P01018781	1	190830
A_75_P01018848		1	191693	0.38	0.43	-0.07	-0.37			A_75_P01018848	1	191693
A_75_P01018861		1	191840	0.1	-0.01	-0.13	-0.48			A_75_P01018861	1	191840
A_75_P01018894		1	192237	0.45	0.47	-0.06	0.36			A_75_P01018894	1	192237
A_75_P01018950		1	192821	0.16	0.07	0.1	0.04			A_75_P01018950	1	192821
A_75_P01019042		1	193813	-0.3	-0.03	0	-0.29			A_75_P01019042	1	193813
A_75_P01019112		1	194508	-0.13	-0.02	0.22				A_75_P01019112	1	194508
A_75_P01019175		1	195154	-0.22	0.21	0.26	-0.05			A_75_P01019175	1	195154
A_75_P01019260		1	196008	-0.27	-0.21	0.18	0.23			A_75_P01019260	1	196008
A_75_P01019331		1	196754	-0.26	-0.21		-1.44			A_75_P01019331	1	196754
A_75_P01019383		1	197254	-0.16	-0.25	0.23	-0.28			A_75_P01019383	1	197254
A_75_P01019459		1	198003	-0.24	-0.39	-0.13	-0.26			A_75_P01019459	1	198003
A_75_P01019538		1	198759	-0.13	0.07	-2.34	-0.24			A_75_P01019538	1	198759
A_75_P01019594		1	199310	-0.02	-0.03	-0.59	-0.98			A_75_P01019594	1	199310
A_75_P01019669		1	200086			-0.92	-1.17			A_75_P01019669	1	200086
A_75_P01019693		1	200353			-1.59	-1.28			A_75_P01019693	1	200353
A_75_P01019747		1	200883			-1.75				A_75_P01019747	1	200883
A_75_P01019791		1	201375			-1.65	-1.41			A_75_P01019791	1	201375
A_75_P01019855		1	202009			-0.74	-1.2			A_75_P01019855	1	202009
A_75_P01019931		1	202726	-0.16	-0.12	0.42	0.3			A_75_P01019931	1	202726
A_75_P01020000		1	203405	0.01	0.16	-0.25	-0.16			A_75_P01020000	1	203405
A_75_P01020270		1	206273	0.22	0.3	-2.06	-2.38			A_75_P01020270	1	206273
A_75_P01020408		1	207629	0	-0.03	-0.94	-1.15			A_75_P01020408	1	207629
A_75_P01022284		1	226845	-0.34	-0.5	-1.4				A_75_P01022284	1	226845
A_75_P01022345		1	227433			-1.44	-1.59			A_75_P01022345	1	227433
A_75_P01022508		1	229146	0.25	0.28	-0.46	-0.15			A_75_P01022508	1	229146
A_75_P01022572		1	229802			-0.45	-0.76			A_75_P01022572	1	229802
A_75_P01023234		2	6566	0.21	0.12	0.75	0.75			A_75_P01023234	2	6566
A_75_P01023395		2	8282	0.07	-0.07	0.85	0.53			A_75_P01023395	2	8282
A_75_P01023448		2	8802	0.3	0.29	-0.43	-0.62			A_75_P01023448	2	8802
A_75_P01023549		2	9790	-0.11	-0.24	0.38	0.07			A_75_P01023549	2	9790
A_75_P01023608		2	10392	-0.13	-0.09	-0.37	-0.01			A_75_P01023608	2	10392
A_75_P01023730		2	11589	-0.01	0.06	0.19	0.09			A_75_P01023730	2	11589
A_75_P01023785		2	12113	0.02	0.07	0.09	0.06			A_75_P01023785	2	12113
A_75_P01023877		2	13062	-0.13	-0.06	0.12	0.23			A_75_P01023877	2	13062
A_75_P01023953		2	13820	-0.45	-0.38	-0.07	0.46			A_75_P01023953	2	13820
A_75_P01024026		2	14550	0.13	0.13		-0.65			A_75_P01024026	2	14550
A_75_P01024089		2	15211	-0.09	-0.03	-0.45	-0.16			A_75_P01024089	2	15211
A_75_P01024155		2	15814	-0.05	-0.13	-0.06	0.01			A_75_P01024155	2	15814
A_75_P01024232		2	16596	0.26	0.38	-0.08	0.1			A_75_P01024232	2	16596
A_75_P01024322		2	17503	-0.01	0.02	-0.23	-0.17			A_75_P01024322	2	17503
A_75_P01024341		2	17687	0.33	0.34	0.02	0.28			A_75_P01024341	2	17687
A_75_P01024385		2	18141	0.34	0.21	-0.65	-0.31			A_75_P01024385	2	18141
A_75_P01024492		2	19208	0.09	0.06	0.19	0.24			A_75_P01024492	2	19208
A_75_P01024576		2	20086	0.02	0.12	-0.18	0.06			A_75_P01024576	2	20086
A_75_P01024632		2	20628	0.03	0.02	0.23	0.24			A_75_P01024632	2	20628
A_75_P01024701		2	21262	0.08	-0.04	-0.78	0.09			A_75_P01024701	2	21262
A_75_P01024781		2	22018	-0.31	0.02	-0.21	-0.33			A_75_P01024781	2	22018
A_75_P01024874		2	22961	0.15	0.08	-0.02	0.05			A_75_P01024874	2	22961
A_75_P01024949		2	23774	0.18	0.13	-0.01	0.42			A_75_P01024949	2	23774
A_75_P01025033		2	24599	0.36	0.32	-0.01	-0.4			A_75_P01025033	2	24599
A_75_P01025119		2	25416	-0.2	-0.14	-0.2	-0.18			A_75_P01025119	2	25416
A_75_P01025190		2	26191	0.31	0.23	-0.31	0.16			A_75_P01025190	2	26191
A_75_P01025291		2	27223	-0.2	-0.08	0.14	0.22			A_75_P01025291	2	27223
A_75_P01025331		2	27615	0.11	0.09	0.01	-0.11			A_75_P01025331	2	27615
A_75_P01025382		2	28099	-0.15	-0.12	0.38	-0.12			A_75_P01025382	2	28099
A_75_P01025443		2	28709	0.07	0.08	0.51	0.44			A_75_P01025443	2	28709
A_75_P01026103		2	35567	0.34	0.28	-0.2	-0.27			A_75_P01026103	2	35567
A_75_P01026196		2	36473	0.39	0.23	0.51	0.28			A_75_P01026196	2	36473
A_75_P01026261		2	37164	-0.33	-0.33	-0.91	-0.9			A_75_P01026261	2	37164
A_75_P01026335		2	37919	-0.26	-0.07	-0.09	0.27			A_75_P01026335	2	37919
A_75_P01026419		2	38763	-0.22	-0.45	0.32	0.42			A_75_P01026419	2	38763
A_75_P01026500		2	39564	-0.25	-0.3	-0.47	0.39			A_75_P01026500	2	39564
A_75_P01026586		2	40420	-0.12	0.15	0.15	0.38			A_75_P01026586	2	40420
A_75_P01026672		2	41293	-0.25	-0.15	-0.13	-0.19			A_75_P01026672	2	41293
A_75_P01026737		2	41984	-0.29	-0.36		-1.18			A_75_P01026737	2	41984
A_75_P01026803		2	42676	0.04	0.33	-0.51	-0.13			A_75_P01026803	2	42676
A_75_P01026821		2	42860	-0.25	0.14	0.57	-0.18			A_75_P01026821	2	42860
A_75_P01026898		2	43659	-0.01	-0.13	-1.1	-0.48			A_75_P01026898	2	43659
A_75_P01026965		2	44309	0.36	0.18	-0.76	-0.66			A_75_P01026965	2	44309
A_75_P01027037		2	45013	0.09	0.09	0.02	0.08			A_75_P01027037	2	45013
A_75_P01027104		2	45655	0.02	0.08	0.27	0.41			A_75_P01027104	2	45655
A_75_P01027162		2	46255	-0.21	-0.11	0.74	0.35			A_75_P01027162	2	46255
A_75_P01027231		2	46973	0.02	0.29	0.37	0.16			A_75_P01027231	2	46973
A_75_P01027330		2	47964	-0.07	-0.06	-0.63	-0.6			A_75_P01027330	2	47964
A_75_P01027404		2	48779	0.01	-0.16	-0.45	0.03			A_75_P01027404	2	48779
A_75_P01027532		2	50097	0.24	0.07	-0.38	-0.07			A_75_P01027532	2	50097
A_75_P01027634		2	51080	0.16	0.27	0.46	0			A_75_P01027634	2	51080
A_75_P01027718		2	51934	0.08	0.08	-0.93	-0.17			A_75_P01027718	2	51934
A_75_P01027782		2	52585	0.22	0.08	0.41	0.5			A_75_P01027782	2	52585
A_75_P01027810		2	52872	0.27	0.35	0.23	0.31			A_75_P01027810	2	52872
A_75_P01027845		2	53255	0.26	0.16	-0.61	0.05			A_75_P01027845	2	53255
A_75_P01027916		2	53970	-0.33	-0.45	-1.94	-1.35			A_75_P01027916	2	53970
A_75_P01028006		2	54946	-0.22	-0.25	-0.4	0.29			A_75_P01028006	2	54946
A_75_P01028081		2	55694	-0.37	-0.23	-0.26	0.04			A_75_P01028081	2	55694
A_75_P01028146		2	56357	0.05	0.01	0.19	0.01			A_75_P01028146	2	56357
A_75_P01028222		2	57104	-0.32	-0.21	0.43	0.22			A_75_P01028222	2	57104
A_75_P01028291		2	57794	-0.18	-0.19	-0.22	0.19			A_75_P01028291	2	57794
A_75_P01028381		2	58739	0.06	0.04	0.2	0.42			A_75_P01028381	2	58739
A_75_P01028443		2	59341	0.27	0.2	0.57	0.4			A_75_P01028443	2	59341
A_75_P01028561		2	60534	0.15	0.2	-0.26	0.29			A_75_P01028561	2	60534
A_75_P01028662		2	61515	0	0.1		-0.81			A_75_P01028662	2	61515
A_75_P01028760		2	62519	0.24	0.36	-0.22	0.1			A_75_P01028760	2	62519
A_75_P01028795		2	62860	0.14	0.07	-0.78	-0.39			A_75_P01028795	2	62860
A_75_P01028843		2	63365	-0.18	-0.21	0.35	0.38			A_75_P01028843	2	63365
A_75_P01028926		2	64213	-0.09	-0.11	-0.02	0.26			A_75_P01028926	2	64213
A_75_P01029029		2	65268	-0.01	-0.19	0.05	0.25			A_75_P01029029	2	65268
A_75_P01029115		2	66116	-0.11	-0.12	0.18	-0.08			A_75_P01029115	2	66116
A_75_P01029200		2	66916	-0.09	-0.28	0.36	0.09			A_75_P01029200	2	66916
A_75_P01029291		2	67871	-0.42	-0.33	-0.27	-0.19			A_75_P01029291	2	67871
A_75_P01029360		2	68620	0.35	0.36	0.37	0.26			A_75_P01029360	2	68620
A_75_P01029524		2	70229	0.27	0.11		-1.18			A_75_P01029524	2	70229
A_75_P01029605		2	71135	0.31	0.4	0.03	-0.09			A_75_P01029605	2	71135
A_75_P01029690		2	72007	0.25	0.16	-0.22	-0.01			A_75_P01029690	2	72007
A_75_P01029753		2	72654	0.34	0.27		-1.58			A_75_P01029753	2	72654
A_75_P01029772		2	72840	0.24	0.14	0.24	0.07			A_75_P01029772	2	72840
A_75_P01029819		2	73336	-0.44	-0.23	-0.12	0.04			A_75_P01029819	2	73336
A_75_P01029889		2	74085	-0.1	-0.07	-0.94	-0.84			A_75_P01029889	2	74085
A_75_P01029977		2	74931	-0.09	0.1	-0.39	0.2			A_75_P01029977	2	74931
A_75_P01030072		2	75843	0.08	0.1	0.01	-0.09			A_75_P01030072	2	75843
A_75_P01030122		2	76363	-0.35	-0.2	0.42	-0.12			A_75_P01030122	2	76363
A_75_P01030206		2	77203	0.21	0.2	0.26	0.13			A_75_P01030206	2	77203
A_75_P01030268		2	77819	-0.22	-0.34	-0.69	-1			A_75_P01030268	2	77819
A_75_P01030367		2	78816	0.14	0.07	-0.19	0.19			A_75_P01030367	2	78816
A_75_P01030466		2	79821	-0.41	-0.51	0.09	0.28			A_75_P01030466	2	79821
A_75_P01030541		2	80586	0.21	0.27	-0.49	-0.12			A_75_P01030541	2	80586
A_75_P01030637		2	81507	0.17	0.18	0.01	-0.15			A_75_P01030637	2	81507
A_75_P01030750		2	82650	-0.13	-0.08	0.37	0.44			A_75_P01030750	2	82650
A_75_P01030778		2	82955	0.12	0.01	-0.69	-0.34			A_75_P01030778	2	82955
A_75_P01030841		2	83518	-0.29	-0.51	-0.08	0.14			A_75_P01030841	2	83518
A_75_P01030927		2	84394	0.06	0.23	-0.59	0.07			A_75_P01030927	2	84394
A_75_P01031016		2	85366	-0.19	-0.26		-0.97			A_75_P01031016	2	85366
A_75_P01031099		2	86197	-0.14	-0.07	0.17	0.15			A_75_P01031099	2	86197
A_75_P01031196		2	87154	-0.18	-0.21	-0.11	-0.57			A_75_P01031196	2	87154
A_75_P01031252		2	87727	0.04	0.2	0.15	-0.07			A_75_P01031252	2	87727
A_75_P01031374		2	88963	0.24	0.21	0.48	0.12			A_75_P01031374	2	88963
A_75_P01031471		2	89889	-0.2	-0.4	-0.08	0			A_75_P01031471	2	89889
A_75_P01031550		2	90724	-0.05	-0.15	-0.57	-0.24			A_75_P01031550	2	90724
A_75_P01031618		2	91389	-0.57	-0.42	-1.09	-0.03			A_75_P01031618	2	91389
A_75_P01031679		2	91985	-0.23	-0.37	0.18	0.21			A_75_P01031679	2	91985
A_75_P01031767		2	92891	-0.11	-0.14		-0.94			A_75_P01031767	2	92891
A_75_P01031790		2	93134	0.09	0.11	0.53	0.19			A_75_P01031790	2	93134
A_75_P01031848		2	93746	0.28	0.21	0.61	0.23			A_75_P01031848	2	93746
A_75_P01031943		2	94636	-0.4	-0.32	0.03	-0.38			A_75_P01031943	2	94636
A_75_P01032044		2	95681	-0.24	-0.33	0.26	-0.09			A_75_P01032044	2	95681
A_75_P01032108		2	96289	0.11	-0.02	0.22	0.39			A_75_P01032108	2	96289
A_75_P01032173		2	96927	-0.61	-0.32	-0.87	-0.42			A_75_P01032173	2	96927
A_75_P01032242		2	97635	-0.11	-0.01	-0.15	-0.05			A_75_P01032242	2	97635
A_75_P01032331		2	98465	0.27	0.26	-0.07	-0.01			A_75_P01032331	2	98465
A_75_P01032416		2	99276	-0.18	-0.17	-0.91	-0.59			A_75_P01032416	2	99276
A_75_P01032490		2	100021	0.16	0.08	-1.17	-0.96			A_75_P01032490	2	100021
A_75_P01032576		2	100910	0.24	0.25	-1.02	-0.96			A_75_P01032576	2	100910
A_75_P01032664		2	101810	0.15	0.15	-0.04	-0.17			A_75_P01032664	2	101810
A_75_P01032737		2	102522	-0.01	-0.09	-0.35	-0.41			A_75_P01032737	2	102522
A_75_P01032755		2	102691	-0.21	-0.31	-0.61	0.24			A_75_P01032755	2	102691
A_75_P01032807		2	103259	-0.27	-0.27	0.31	0.06			A_75_P01032807	2	103259
A_75_P01032882		2	104003	0.09	-0.02	0.04	0.02			A_75_P01032882	2	104003
A_75_P01032951		2	104701	-0.17	-0.25	-0.95	-0.62			A_75_P01032951	2	104701
A_75_P01033018		2	105374	0.28	0.16	0.15	0.12			A_75_P01033018	2	105374
A_75_P01033092		2	106133	0.16	0.04	0	-0.07			A_75_P01033092	2	106133
A_75_P01033168		2	106844	-0.17	-0.23	-0.73	0.05			A_75_P01033168	2	106844
A_75_P01033232		2	107452	-0.08	-0.01	0.36	0.17			A_75_P01033232	2	107452
A_75_P01033310		2	108262	0.09	0.01		-1.3			A_75_P01033310	2	108262
A_75_P01033391		2	109092	-0.1	-0.08	-0.63	-0.46			A_75_P01033391	2	109092
A_75_P01033493		2	110075	0.32	0.38	-0.82	-0.18			A_75_P01033493	2	110075
A_75_P01033576		2	110856	0.05	-0.06	0.45	0.25			A_75_P01033576	2	110856
A_75_P01033660		2	111759	0.12	0.16	0.29	0.4			A_75_P01033660	2	111759
A_75_P01033692		2	112062	0.03	-0.12	0.02	-0.15			A_75_P01033692	2	112062
A_75_P01033754		2	112753	0.11	0.06	-2.16	-1.4			A_75_P01033754	2	112753
A_75_P01033830		2	113532	-0.26	-0.2	-1.59	-1.16			A_75_P01033830	2	113532
A_75_P01033893		2	114196	0.06	0.05	0.3	0.2			A_75_P01033893	2	114196
A_75_P01033969		2	114957	0.18	0.49	0.18	0.23			A_75_P01033969	2	114957
A_75_P01034062		2	115886	0.03	-0.01	-0.36	-0.01			A_75_P01034062	2	115886
A_75_P01034147		2	116755	0.11	0.06	-0.03	-0.27			A_75_P01034147	2	116755
A_75_P01034233		2	117605	0.19	0.15	0.01	0.1			A_75_P01034233	2	117605
A_75_P01034317		2	118407	-0.2	-0.24	-0.19	0.2			A_75_P01034317	2	118407
A_75_P01034418		2	119372	0.26	0.24	-0.44	-0.47			A_75_P01034418	2	119372
A_75_P01034493		2	120115	0.12	0.01	-0.56	-0.29			A_75_P01034493	2	120115
A_75_P01034589		2	121029	0.12	0.15	0.2	0.2			A_75_P01034589	2	121029
A_75_P01034649		2	121703	0.06	0.04	-0.53	-0.27			A_75_P01034649	2	121703
A_75_P01034678		2	121976	-0.02	0.19	-0.38	-0.28			A_75_P01034678	2	121976
A_75_P01034722		2	122395	-0.06	0.03	0.32	0.04			A_75_P01034722	2	122395
A_75_P01034805		2	123280	0.03	0.12	-0.55	-0.24			A_75_P01034805	2	123280
A_75_P01034885		2	124056	0.4	0.21	0.4	0.11			A_75_P01034885	2	124056
A_75_P01034955		2	124769	-0.12	-0.01	-0.28	-0.14			A_75_P01034955	2	124769
A_75_P01035047		2	125689	0.05	0.05	-0.87	-0.3			A_75_P01035047	2	125689
A_75_P01035102		2	126203	0.08	-0.02	0.26	0.05			A_75_P01035102	2	126203
A_75_P01035196		2	127195	0.42	0.13	0.44	0.02			A_75_P01035196	2	127195
A_75_P01035275		2	128004	0.11	0.06	-0.04	0.05			A_75_P01035275	2	128004
A_75_P01035376		2	129021	0.17	0.33	-0.44				A_75_P01035376	2	129021
A_75_P01035447		2	129739	0.17	0.19	-0.71	-0.21			A_75_P01035447	2	129739
A_75_P01035520		2	130461	0.2	0.15	-0.41	-0.39			A_75_P01035520	2	130461
A_75_P01035592		2	131178	-0.35	-0.25	-0.06	0.37			A_75_P01035592	2	131178
A_75_P01035615		2	131397	-0.29	-0.02	0.55	-0.07			A_75_P01035615	2	131397
A_75_P01035677		2	132041	-0.06	0.05	0.03	-0.04			A_75_P01035677	2	132041
A_75_P01035781		2	133103	-0.42	-0.44	0.61	0.03			A_75_P01035781	2	133103
A_75_P01035885		2	134102	-0.05	0.07	-0.72	-0.36			A_75_P01035885	2	134102
A_75_P01035954		2	134780	-0.48	-0.46	-0.5	-0.02			A_75_P01035954	2	134780
A_75_P01036030		2	135522	-0.32	0.3	0.4	0.22			A_75_P01036030	2	135522
A_75_P01036127		2	136448	-0.23	-0.2	0.17	0.34			A_75_P01036127	2	136448
A_75_P01036195		2	137118	0.05	0.04	-0.81	-0.74			A_75_P01036195	2	137118
A_75_P01036247		2	137673	-0.18	0.08	-0.3	0.09			A_75_P01036247	2	137673
A_75_P01036328		2	138476	-0.07	-0.06	-0.15	-0.17			A_75_P01036328	2	138476
A_75_P01036433		2	139522	0.03	0.04	-0.38	-0.66			A_75_P01036433	2	139522
A_75_P01036512		2	140362	-0.17	-0.27	0.18	0.25			A_75_P01036512	2	140362
A_75_P01036591		2	141128	0.14	0.04	0.04	0.18			A_75_P01036591	2	141128
A_75_P01036609		2	141334	0.23	0.27	0.06	-0.32			A_75_P01036609	2	141334
A_75_P01036648		2	141734	-0.14	-0.24	-1.54	-1.04			A_75_P01036648	2	141734
A_75_P01036728		2	142562	-0.16	-0.2	0.22	0.25			A_75_P01036728	2	142562
A_75_P01036792		2	143179	0.3	0.27	0.24	0.3			A_75_P01036792	2	143179
A_75_P01036844		2	143721	-0.34	-0.24	-1.1	-0.29			A_75_P01036844	2	143721
A_75_P01036942		2	144651	0.14	0.12	0.05	-0.04			A_75_P01036942	2	144651
A_75_P01037002		2	145251	-0.12	-0.21	-1.22	-1.48			A_75_P01037002	2	145251
A_75_P01037067		2	145926	-0.26	-0.26	-0.54	-0.16			A_75_P01037067	2	145926
A_75_P01037150		2	146725	-0.09	-0.17	0.07	-0.04			A_75_P01037150	2	146725
A_75_P01037247		2	147725	-0.11	-0.08	-0.7	-0.07			A_75_P01037247	2	147725
A_75_P01037314		2	148413	-0.01	0.04	0.34	0.19			A_75_P01037314	2	148413
A_75_P01037411		2	149372	0.01	0.04	-0.13	-0.05			A_75_P01037411	2	149372
A_75_P01037515		2	150388	0.08	-0.25	0.08	0.32			A_75_P01037515	2	150388
A_75_P01037550		2	150754	-0.03	0.01	0.23	-0.01			A_75_P01037550	2	150754
A_75_P01037631		2	151586	-0.08	-0.23	-0.02	-0.19			A_75_P01037631	2	151586
A_75_P01037721		2	152465	0.2	0.27	0.02	0.21			A_75_P01037721	2	152465
A_75_P01037794		2	153203	-0.14	-0.15	-0.83	-0.35			A_75_P01037794	2	153203
A_75_P01037865		2	153948	0.07	0.08	-0.52	-0.42			A_75_P01037865	2	153948
A_75_P01037954		2	154852	0.1	-0.11	0.24	-0.08			A_75_P01037954	2	154852
A_75_P01038069		2	155982	-0.4	-0.35	0.4	-0.08			A_75_P01038069	2	155982
A_75_P01038144		2	156755	0.07	0.01	0.42	0.25			A_75_P01038144	2	156755
A_75_P01038223		2	157530	0.07	0.25	0.28	0.28			A_75_P01038223	2	157530
A_75_P01038303		2	158360	-0.12	-0.27	0.36	-0.02			A_75_P01038303	2	158360
A_75_P01038385		2	159276	0.34	0.3	-0.51	-0.74			A_75_P01038385	2	159276
A_75_P01038562		2	161103	-0.14	-0.14	-0.39	-0.57			A_75_P01038562	2	161103
A_75_P01038601		2	161475	-0.08	-0.11		-1.62			A_75_P01038601	2	161475
A_75_P01038649		2	161971	0.04	0.17	0.12	-0.03			A_75_P01038649	2	161971
A_75_P01038732		2	162803	-0.3	-0.33	0.21	0.16			A_75_P01038732	2	162803
A_75_P01038790		2	163374	0.22	0.16	-0.61	-0.53			A_75_P01038790	2	163374
A_75_P01038878		2	164306	-0.19	-0.14	-0.34	0.11			A_75_P01038878	2	164306
A_75_P01038944		2	165018	-0.23	-0.01	0.01	0.04			A_75_P01038944	2	165018
A_75_P01039010		2	165711	0.2	0.12	-0.34	-0.55			A_75_P01039010	2	165711
A_75_P01039107		2	166634	0.25	0.38	-0.76	-0.74			A_75_P01039107	2	166634
A_75_P01039211		2	167737	0.13	0.23	0.19	0.11			A_75_P01039211	2	167737
A_75_P01039289		2	168516	-0.16	-0.08	0.31	-0.1			A_75_P01039289	2	168516
A_75_P01039386		2	169508	-0.02	-0.03	0.35	0.4			A_75_P01039386	2	169508
A_75_P01039503		2	170713	-0.13	0.09	-0.71	-0.02			A_75_P01039503	2	170713
A_75_P01039602		2	171730	-0.16	-0.43	-0.58	-0.45			A_75_P01039602	2	171730
A_75_P01039623		2	171931	0.01	0.03	0.24				A_75_P01039623	2	171931
A_75_P01039692		2	172661	0.13	-0.06	0.59	0.31			A_75_P01039692	2	172661
A_75_P01039776		2	173470	0.34	0.32	0.29	0.34			A_75_P01039776	2	173470
A_75_P01039846		2	174193	-0.1	-0.04	0.04	0.26			A_75_P01039846	2	174193
A_75_P01039935		2	175080	-0.21	-0.02	-0.3	-0.1			A_75_P01039935	2	175080
A_75_P01039989		2	175595	0.2	0.12	-1.79	-1.16			A_75_P01039989	2	175595
A_75_P01040065		2	176336	0.06	0	0.5	0.55			A_75_P01040065	2	176336
A_75_P01040131		2	176967	0.25	0.23	0.22	0.44			A_75_P01040131	2	176967
A_75_P01040220		2	177831	0.2	-0.08	0.18	0.28			A_75_P01040220	2	177831
A_75_P01040332		2	178901	0.14	0.01	-0.39	-0.92			A_75_P01040332	2	178901
A_75_P01040450		2	180045	0.17	0.01	-0.26	0			A_75_P01040450	2	180045
A_75_P01040547		2	181046	0.14	0.12	-0.73	-0.56			A_75_P01040547	2	181046
A_75_P01040627		2	181856	0.29	0.3	-0.43	-0.45			A_75_P01040627	2	181856
A_75_P01040647		2	182066	0.06	0.07	0.19	0.02			A_75_P01040647	2	182066
A_75_P01040717		2	182764	0.27	0.16	0.36	0.1			A_75_P01040717	2	182764
A_75_P01040808		2	183716	-0.09	-0.31	0.29	0.33			A_75_P01040808	2	183716
A_75_P01040862		2	184248	-0.03	-0.01	0.08	-0.07			A_75_P01040862	2	184248
A_75_P01040938		2	184992	0.05	0.07	-0.38	-0.4			A_75_P01040938	2	184992
A_75_P01041027		2	185846	0.08	0.09	0.39	0.49			A_75_P01041027	2	185846
A_75_P01041133		2	186893	0.17	0.13	0.02	0.24			A_75_P01041133	2	186893
A_75_P01041223		2	187759	0.19	0.05	0.64	0.26			A_75_P01041223	2	187759
A_75_P01041358		2	189103	-0.41	-0.27	-0.69	0.22			A_75_P01041358	2	189103
A_75_P01041437		2	189879	0.17	0.16	0.41	0.35			A_75_P01041437	2	189879
A_75_P01041526		2	190790	-0.34	-0.36	-0.69	0.18			A_75_P01041526	2	190790
A_75_P01041612		2	191655	-0.03	-0.11	-0.94	-0.43			A_75_P01041612	2	191655
A_75_P01041676		2	192272	0.09	0.07	-0.01	0.21			A_75_P01041676	2	192272
A_75_P01041715		2	192671	0.21	0.2	-0.21	0.24			A_75_P01041715	2	192671
A_75_P01041786		2	193426	0.12	0.18	-0.73	-0.72			A_75_P01041786	2	193426
A_75_P01041856		2	194137	-0.37	-0.31	0.24	0.18			A_75_P01041856	2	194137
A_75_P01041919		2	194838	-0.32	-0.32	-0.56	-0.32			A_75_P01041919	2	194838
A_75_P01041987		2	195581	-0.26	-0.01	0.09	0.03			A_75_P01041987	2	195581
A_75_P01042049		2	196189	0	0.02	-0.03	-0.16			A_75_P01042049	2	196189
A_75_P01042148		2	197205	-0.06	-0.07	-0.09	0.49			A_75_P01042148	2	197205
A_75_P01042269		2	198438	-0.08	-0.09	0.04	-0.3			A_75_P01042269	2	198438
A_75_P01042370		2	199452	-0.14	0.03	-0.31	-0.11			A_75_P01042370	2	199452
A_75_P01042454		2	200322	0.38	0.38	-0.36	-0.08			A_75_P01042454	2	200322
A_75_P01042531		2	201031	0.21	0.16	0.27	0.34			A_75_P01042531	2	201031
A_75_P01042611		2	201863	-0.39	-0.41	-1.27	-0.97			A_75_P01042611	2	201863
A_75_P01042686		2	202640	0.34	0.27	-0.42	-0.52			A_75_P01042686	2	202640
A_75_P01042720		2	202986	-0.01	-0.07	0.38	0.07			A_75_P01042720	2	202986
A_75_P01042758		2	203385	0.35	0.31	-0.65	-0.24			A_75_P01042758	2	203385
A_75_P01042848		2	204323	-0.2	-0.15	-0.02	-0.35			A_75_P01042848	2	204323
A_75_P01042940		2	205204	-0.34	-0.44	-0.31	-0.89			A_75_P01042940	2	205204
A_75_P01043015		2	205992	-0.03	-0.07	-0.5	-0.48			A_75_P01043015	2	205992
A_75_P01043089		2	206721	-0.09	-0.08	0.33	-0.07			A_75_P01043089	2	206721
A_75_P01043150		2	207339	0.13	0.13	0.12	0.44			A_75_P01043150	2	207339
A_75_P01043212		2	208001	-0.09	0.22	0.4	0.41			A_75_P01043212	2	208001
A_75_P01043281		2	208633	0.2	0.21	-1.5	-1.08			A_75_P01043281	2	208633
A_75_P01043359		2	209373	0.26	0.21	-0.66	-0.22			A_75_P01043359	2	209373
A_75_P01043443		2	210191	-0.22	-0.1	0.42	-0.16			A_75_P01043443	2	210191
A_75_P01043535		2	211104	0.3	0.09	0.41	0.13			A_75_P01043535	2	211104
A_75_P01043621		2	211938	-0.06	-0.05	-0.65	-1.07			A_75_P01043621	2	211938
A_75_P01043652		2	212283	0.26	0.26	0.21	0.35			A_75_P01043652	2	212283
A_75_P01043702		2	212807	0.3	0.15	0.31	0.25			A_75_P01043702	2	212807
A_75_P01043772		2	213574	0.23	0.07	0.22	-0.03			A_75_P01043772	2	213574
A_75_P01043860		2	214484	0.46	0.43	0.13	-0.2			A_75_P01043860	2	214484
A_75_P01043943		2	215327	-0.03	0.02	-0.48	0.02			A_75_P01043943	2	215327
A_75_P01044019		2	216034	0.33	0.25	0.15	0.17			A_75_P01044019	2	216034
A_75_P01044105		2	216896	0.34	0.45	-0.28	-0.21			A_75_P01044105	2	216896
A_75_P01044167		2	217528	0.27	0.23	0.58	0.35			A_75_P01044167	2	217528
A_75_P01044261		2	218421	0.15	0.15	-0.81	-0.25			A_75_P01044261	2	218421
A_75_P01044328		2	219076	-0.02	-0.23	-0.35	-0.36			A_75_P01044328	2	219076
A_75_P01044405		2	219867	0.24	0.15	0.47	0.49			A_75_P01044405	2	219867
A_75_P01044472		2	220575	0.37	0.34	0.02	-0.09			A_75_P01044472	2	220575
A_75_P01045088		2	226877	0.62	0.46	-0.3	0.34			A_75_P01045088	2	226877
A_75_P01045127		2	227244	0.35	0.25	0.37	-0.06			A_75_P01045127	2	227244
A_75_P01045201		2	227997	0.17	0.22	0.27	0.44			A_75_P01045201	2	227997
A_75_P01045286		2	228885	-0.15	-0.4	0.03	0.48			A_75_P01045286	2	228885
A_75_P01045354		2	229554	0.08	0.06	-0.76	-0.32			A_75_P01045354	2	229554
A_75_P01045471		2	230671	-0.22	-0.06	-0.91	-0.11			A_75_P01045471	2	230671
A_75_P01045539		2	231370	-0.36	-0.35	-1.43	-0.41			A_75_P01045539	2	231370
A_75_P01045626		2	232222	0.15	0.03	0.22	0.06			A_75_P01045626	2	232222
A_75_P01045724		2	233190	-0.28	-0.39	0.24	0.49			A_75_P01045724	2	233190
A_75_P01045805		2	233982	-0.29	-0.45	0.35	0.25			A_75_P01045805	2	233982
A_75_P01045891		2	234839	-0.02	-0.05	0.14	0.05			A_75_P01045891	2	234839
A_75_P01046002		2	235962	0.09	0.19	-0.28	-0.12			A_75_P01046002	2	235962
A_75_P01046080		2	236697	-0.15	-0.2	-0.3	0.24			A_75_P01046080	2	236697
A_75_P01046161		2	237483	0.04	0.13	-0.54	-0.17			A_75_P01046161	2	237483
A_75_P01046182		2	237687	-0.16	-0.36	0.13	0.19			A_75_P01046182	2	237687
A_75_P01046222		2	238067	-0.07	0.06	0.35	0.1			A_75_P01046222	2	238067
A_75_P01046312		2	238977	0.21	0.09	0.33	-0.02			A_75_P01046312	2	238977
A_75_P01046387		2	239745	0.06	0.06	-0.07	-0.22			A_75_P01046387	2	239745
A_75_P01046455		2	240366	0.07	0.08	-0.61	-0.13			A_75_P01046455	2	240366
A_75_P01046538		2	241231	-0.09	-0.03	-1.3	-0.61			A_75_P01046538	2	241231
A_75_P01046646		2	242297	0.04	-0.04	-0.99	-1.01			A_75_P01046646	2	242297
A_75_P01046715		2	243019	-0.03	-0.1	-0.39	-0.41			A_75_P01046715	2	243019
A_75_P01046780		2	243687	0.04	-0.18	-0.82	-0.56			A_75_P01046780	2	243687
A_75_P01046871		2	244567	-0.22	-0.1	0.52	0.35			A_75_P01046871	2	244567
A_75_P01046930		2	245148	-0.3	-0.29	-0.61	-0.14			A_75_P01046930	2	245148
A_75_P01047006		2	245909	0.03	0.13	0.23	0.33			A_75_P01047006	2	245909
A_75_P01047100		2	246805	0.01	-0.04	0.23	0.12			A_75_P01047100	2	246805
A_75_P01047127		2	247149	-0.14	-0.1	0.38	-0.02			A_75_P01047127	2	247149
A_75_P01047179		2	247651	-0.32	-0.27	0.1	0.51			A_75_P01047179	2	247651
A_75_P01047243		2	248271	-0.03	-0.11	0.1	0.53			A_75_P01047243	2	248271
A_75_P01047327		2	249139	0.39	0.26	-0.36	-0.04			A_75_P01047327	2	249139
A_75_P01047414		2	250008	-0.34	-0.05	-0.31	0.17			A_75_P01047414	2	250008
A_75_P01047515		2	250978	-0.01	-0.05	0.25	0.33			A_75_P01047515	2	250978
A_75_P01047573		2	251584	0.05	0.04	-0.42	-0.21			A_75_P01047573	2	251584
A_75_P01047641		2	252221	-0.05	-0.1	-0.08	0.02			A_75_P01047641	2	252221
A_75_P01047756		2	253356	-0.12	-0.15	-0.42	0.02			A_75_P01047756	2	253356
A_75_P01047861		2	254360	0.14	0.19	-0.79	-0.44			A_75_P01047861	2	254360
A_75_P01047986		2	255628	0.09	0.08	-0.23	0.05			A_75_P01047986	2	255628
A_75_P01048085		2	256658	-0.08	-0.07	0.26	0.62			A_75_P01048085	2	256658
A_75_P01048144		2	257254	0.17	0.18	-0.21	-0.22			A_75_P01048144	2	257254
A_75_P01048165		2	257478	-0.03	-0.06	0.24	0.36			A_75_P01048165	2	257478
A_75_P01048293		2	258779	0.34	0.45	-0.44	0.7			A_75_P01048293	2	258779
A_75_P01048956		2	265418	0.46	0.4	0.62	0.16			A_75_P01048956	2	265418
A_75_P01049032		2	266209	-0.34	-0.27	-0.07	-0.13			A_75_P01049032	2	266209
A_75_P01049131		2	267221	-0.41	0.13	0.11	-0.03			A_75_P01049131	2	267221
A_75_P01049204		2	267952	0.03	0.04	0.26	0.18			A_75_P01049204	2	267952
A_75_P01049286		2	268746	-0.07	-0.17	-0.78	-0.34			A_75_P01049286	2	268746
A_75_P01049392		2	269871	-0.2	-0.02	-0.29	-0.2			A_75_P01049392	2	269871
A_75_P01049460		2	270591	-0.25	-0.24	-0.88	-1.03			A_75_P01049460	2	270591
A_75_P01049545		2	271413	-0.07	0.36	0.69	0.34			A_75_P01049545	2	271413
A_75_P01049607		2	272073	0.24	0.23	0.42	0.22			A_75_P01049607	2	272073
A_75_P01049676		2	272789	-0.43	-0.09	0.26	0.39			A_75_P01049676	2	272789
A_75_P01049695		2	272979	0.1	0.18	0.28	0.03			A_75_P01049695	2	272979
A_75_P01049759		2	273651	-0.08	-0.12	-0.02	-0.13			A_75_P01049759	2	273651
A_75_P01049826		2	274291	-0.11	-0.2	-0.91	-0.42			A_75_P01049826	2	274291
A_75_P01049907		2	275141	0.3	0.19		-1.68			A_75_P01049907	2	275141
A_75_P01049995		2	276008	-0.12	-0.11	-0.27	-0.27			A_75_P01049995	2	276008
A_75_P01050058		2	276651	0.09	0.1	0.19	0.46			A_75_P01050058	2	276651
A_75_P01050158		2	277640	-0.22	-0.32	-0.02	0.09			A_75_P01050158	2	277640
A_75_P01050236		2	278441	-0.03	-0.2	0.11	0.05			A_75_P01050236	2	278441
A_75_P01050328		2	279361	0	-0.13	0.05	0.29			A_75_P01050328	2	279361
A_75_P01050419		2	280294	-0.27	-0.27	-1.16	-0.57			A_75_P01050419	2	280294
A_75_P01050498		2	281102	-0.73	-0.15	0.55	0.5			A_75_P01050498	2	281102
A_75_P01050558		2	281729	0.25	0.25	0.36	-0.12			A_75_P01050558	2	281729
A_75_P01050626		2	282367	0.21	0.15		-2.21			A_75_P01050626	2	282367
A_75_P01050654		2	282634	0.05	0.19	-0.55	-0.8			A_75_P01050654	2	282634
A_75_P01050697		2	283084	0.28	0.26	0.34	0.36			A_75_P01050697	2	283084
A_75_P01050780		2	283912	0.2	0	0.49	0.55			A_75_P01050780	2	283912
A_75_P01050843		2	284577	-0.1	-0.05	0.2	0.09			A_75_P01050843	2	284577
A_75_P01050920		2	285351	0.01	0	-0.55	0.05			A_75_P01050920	2	285351
A_75_P01050995		2	286132	0.07	0.18	-0.64	0.12			A_75_P01050995	2	286132
A_75_P01051081		2	286952	-0.29	0.01	0.22	-0.01			A_75_P01051081	2	286952
A_75_P01051181		2	287928	-0.24	-0.29	-0.94	-0.04			A_75_P01051181	2	287928
A_75_P01051243		2	288604	0.05	0.07	-0.72	-0.43			A_75_P01051243	2	288604
A_75_P01051339		2	289550	-0.15	-0.13	-0.56	-0.03			A_75_P01051339	2	289550
A_75_P01051452		2	290669	0.33	0.23	0.23	-0.07			A_75_P01051452	2	290669
A_75_P01051529		2	291449	0.13	0	0.15	0.3			A_75_P01051529	2	291449
A_75_P01051621		2	292448	-0.23	-0.26	-0.69	-0.63			A_75_P01051621	2	292448
A_75_P01051644		2	292690	-0.19	-0.06	-0.71	-0.27			A_75_P01051644	2	292690
A_75_P01051682		2	293080	0.07	0.07	-0.76	-0.51			A_75_P01051682	2	293080
A_75_P01051777		2	294013	0.41	0.28	0.04	0.27			A_75_P01051777	2	294013
A_75_P01051881		2	295042	0.06	-0.06	0.12	-0.04			A_75_P01051881	2	295042
A_75_P01051966		2	295921	-0.45	-0.39	-1.02	-0.44			A_75_P01051966	2	295921
A_75_P01052027		2	296524	-0.34	0.02	0.37	0.26			A_75_P01052027	2	296524
A_75_P01052102		2	297286	0.14	0.14	-0.52	-0.18			A_75_P01052102	2	297286
A_75_P01052170		2	297987	0.11	0.11	-0.62	-0.29			A_75_P01052170	2	297987
A_75_P01052239		2	298627	-0.07	0.04	0.66	0.29			A_75_P01052239	2	298627
A_75_P01052322		2	299460	-0.02	-0.3	0.86	0.34			A_75_P01052322	2	299460
A_75_P01052485		2	301177	-0.12	0.16	0.23	0.52			A_75_P01052485	2	301177
A_75_P01052585		2	302194	0.25	0.11	-0.46	-0.43			A_75_P01052585	2	302194
A_75_P01052692		2	303236	-0.08	-0.27	0.54	0.14			A_75_P01052692	2	303236
A_75_P01052719		2	303536	-0.18	-0.09	0.22	0.6			A_75_P01052719	2	303536
A_75_P01052761		2	303949	-0.07	-0.21	0.38	0.63			A_75_P01052761	2	303949
A_75_P01052837		2	304728	-0.26	-0.09	1.03	0.73			A_75_P01052837	2	304728
A_75_P01052914		2	305503	-0.24	-0.15	-0.43	-0.21			A_75_P01052914	2	305503
A_75_P01052988		2	306245	-0.11	-0.16	-0.43	0.12			A_75_P01052988	2	306245
A_75_P01053079		2	307153	-0.07	-0.18	-0.94	-0.14			A_75_P01053079	2	307153
A_75_P01053158		2	307907	0.1	0.1	-0.15	-0.49			A_75_P01053158	2	307907
A_75_P01053226		2	308565	0.25	0.15	0.13	0.33			A_75_P01053226	2	308565
A_75_P01053277		2	309086	0.34	0.25	0.45	0.08			A_75_P01053277	2	309086
A_75_P01053351		2	309842	0.4	0.39	0.2	0.22			A_75_P01053351	2	309842
A_75_P01053416		2	310494	-0.04	-0.02	-0.82	-0.6			A_75_P01053416	2	310494
A_75_P01053476		2	311100	0.12	0.22	-1.19	-0.36			A_75_P01053476	2	311100
A_75_P01053560		2	311980	0.35	0.33	-1.01	-0.98			A_75_P01053560	2	311980
A_75_P01053595		2	312379	-0.01	0.25	-0.17	0.09			A_75_P01053595	2	312379
A_75_P01053644		2	312858	-0.06	-0.21	-0.91	-0.11			A_75_P01053644	2	312858
A_75_P01053733		2	313717	-0.1	-0.27	0.31	0.35			A_75_P01053733	2	313717
A_75_P01053812		2	314535	0.12	0.11	-0.53	-0.6			A_75_P01053812	2	314535
A_75_P01053870		2	315133	-0.13	-0.14	-1.11	-0.82			A_75_P01053870	2	315133
A_75_P01053971		2	316112	0.3	0.32	-1.05	-0.9			A_75_P01053971	2	316112
A_75_P01054047		2	316913	-0.28	-0.27	0.14	0.55			A_75_P01054047	2	316913
A_75_P01054116		2	317581	0.02	0.05	-0.35	-0.05			A_75_P01054116	2	317581
A_75_P01054174		2	318181	0.1	0.15	-0.87	-0.09			A_75_P01054174	2	318181
A_75_P01054250		2	318950	-0.01	-0.04	-0.35	-0.6			A_75_P01054250	2	318950
A_75_P01054329		2	319755	0.29	0.28	-0.67	0.2			A_75_P01054329	2	319755
A_75_P01054411		2	320548	-0.12	-0.18	-0.32	-1.1			A_75_P01054411	2	320548
A_75_P01054483		2	321301	-0.16	0	-0.19	-0.05			A_75_P01054483	2	321301
A_75_P01054514		2	321602	0.35	0.43	0.41	0.31			A_75_P01054514	2	321602
A_75_P01054576		2	322251	-0.35	0.03	0.1	0.04			A_75_P01054576	2	322251
A_75_P01054647		2	322952	0.34	0.27	0.14	-0.12			A_75_P01054647	2	322952
A_75_P01054745		2	323927	-0.39	-0.24	-1.08	-0.24			A_75_P01054745	2	323927
A_75_P01054812		2	324587	0.11	0.17	0.3	0.2			A_75_P01054812	2	324587
A_75_P01054891		2	325410	-0.15	-0.16	-0.84	0.04			A_75_P01054891	2	325410
A_75_P01054969		2	326230	-0.23	-0.28	0.09	-0.39			A_75_P01054969	2	326230
A_75_P01055041		2	326937	0.14	0.11	0.09	-0.11			A_75_P01055041	2	326937
A_75_P01055160		2	328135	0.27	0.32	0.42	0.3			A_75_P01055160	2	328135
A_75_P01055223		2	328774	-0.17	-0.08	0.27	0.47			A_75_P01055223	2	328774
A_75_P01055296		2	329487	-0.15	-0.03	0.58	0.27			A_75_P01055296	2	329487
A_75_P01055350		2	330068	-0.36	-0.57	-0.93	-0.27			A_75_P01055350	2	330068
A_75_P01055412		2	330733	0.36	0.21	0.24	-0.04			A_75_P01055412	2	330733
A_75_P01055432		2	330939	-0.18	-0.1	0.21	-0.13			A_75_P01055432	2	330939
A_75_P01055518		2	331773	0.15	-0.06	0.4	0.38			A_75_P01055518	2	331773
A_75_P01055629		2	332850	-0.17	-0.27	-1.04	-1.72			A_75_P01055629	2	332850
A_75_P01055762		2	334201	-0.37	-0.25	0.49	0.14			A_75_P01055762	2	334201
A_75_P01055846		2	335068	0.18	0.01	-0.03	-0.07			A_75_P01055846	2	335068
A_75_P01055930		2	335891	0.21	0.07	-0.11	0.09			A_75_P01055930	2	335891
A_75_P01056016		2	336712	0.04	0.08	0.35	0.09			A_75_P01056016	2	336712
A_75_P01056117		2	337718	-0.34	-0.09	-0.03				A_75_P01056117	2	337718
A_75_P01056205		2	338617	-0.11	-0.08	-0.61	-0.51			A_75_P01056205	2	338617
A_75_P01056272		2	339264	-0.24	-0.22	0.46	0.11			A_75_P01056272	2	339264
A_75_P01056339		2	339901	0.03	-0.03	-0.21	-0.3			A_75_P01056339	2	339901
A_75_P01056423		2	340690	-0.31	-0.38	-0.98	-0.63			A_75_P01056423	2	340690
A_75_P01056502		2	341432	0.16	0.25	-1				A_75_P01056502	2	341432
A_75_P01056521		2	341613	-0.47	-0.32	-0.51	0.87			A_75_P01056521	2	341613
A_75_P01056557		2	342020	-0.15	-0.03	-1.11	0.1			A_75_P01056557	2	342020
A_75_P01056617		2	342630	0.27	0.32	-0.36	0.3			A_75_P01056617	2	342630
A_75_P01056704		2	343476	-0.07	-0.04	0.21	0.07			A_75_P01056704	2	343476
A_75_P01056762		2	344164	-0.17	-0.25	-0.98	0.38			A_75_P01056762	2	344164
A_75_P01056837		2	344881	-0.41	-0.16	-0.02	0.36			A_75_P01056837	2	344881
A_75_P01056947		2	345975	-0.29	-0.19	0.25	0.23			A_75_P01056947	2	345975
A_75_P01057045		2	346949	-0.09	-0.19	-0.53	-0.5			A_75_P01057045	2	346949
A_75_P01057117		2	347678	-0.47	-0.77	-0.32	0.28			A_75_P01057117	2	347678
A_75_P01057180		2	348327	-0.09	-0.03	-0.66	0.17			A_75_P01057180	2	348327
A_75_P01057234		2	348901	-0.29	-0.19	0.09	0.19			A_75_P01057234	2	348901
A_75_P01057354		2	350081	-0.26	-0.31	-0.05	0.37			A_75_P01057354	2	350081
A_75_P01057432		2	350867	0.15	0.14	0.37	0.38			A_75_P01057432	2	350867
A_75_P01057465		2	351191	0.18	0.04	0.31	-0.02			A_75_P01057465	2	351191
A_75_P01057520		2	351707	-0.15	-0.16	-0.49	-0.27			A_75_P01057520	2	351707
A_75_P01057627		2	352777	0.28	0.29	-0.5	-0.94			A_75_P01057627	2	352777
A_75_P01057722		2	353754	-0.08	-0.17	-0.16	-0.11			A_75_P01057722	2	353754
A_75_P01057898		2	355507	0.21	-0.14	-0.09	0.16			A_75_P01057898	2	355507
A_75_P01057988		2	356411	0.36	0.3	0.05	0.19			A_75_P01057988	2	356411
A_75_P01058084		2	357451	-0.09	0.09	-0.07	-0.03			A_75_P01058084	2	357451
A_75_P01058175		2	358398	0	0.25	0.07	0.16			A_75_P01058175	2	358398
A_75_P01058252		2	359132	-0.03	-0.04	0.37	0.52			A_75_P01058252	2	359132
A_75_P01058328		2	359964	-0.2	-0.24	-0.02	0.37			A_75_P01058328	2	359964
A_75_P01058398		2	360656	0.13	0.1	0.23	0.27			A_75_P01058398	2	360656
A_75_P01058487		2	361556	-0.2	-0.34	0.18	0.21			A_75_P01058487	2	361556
A_75_P01058521		2	361903	0	-0.1	-0.45	-0.07			A_75_P01058521	2	361903
A_75_P01058574		2	362428	0.06	-0.03	-0.44	-0.4			A_75_P01058574	2	362428
A_75_P01058684		2	363559	0.05	-0.1	-0.26	-0.16			A_75_P01058684	2	363559
A_75_P01058759		2	364342	0.32	0.17	0.4	0.11			A_75_P01058759	2	364342
A_75_P01058827		2	365042	-0.12	-0.19	-0.42	-0.05			A_75_P01058827	2	365042
A_75_P01058914		2	365923	0.12	0.18	0.14	0.24			A_75_P01058914	2	365923
A_75_P01058985		2	366599	0.24	0.3	0.31	0.14			A_75_P01058985	2	366599
A_75_P01059088		2	367591	-0.02	-0.05	-0.24	0.09			A_75_P01059088	2	367591
A_75_P01059162		2	368386	0.07	0.05		-0.95			A_75_P01059162	2	368386
A_75_P01059248		2	369251	-0.02	-0.05	0.28				A_75_P01059248	2	369251
A_75_P01059342		2	370207	0.48	0.46	0.38	0.12			A_75_P01059342	2	370207
A_75_P01059426		2	371081	-0.04	0.05	0.17	0.38			A_75_P01059426	2	371081
A_75_P01059498		2	371883	0.01	-0.04	-0.48	-0.22			A_75_P01059498	2	371883
A_75_P01059530		2	372276	0.13	0.02	0.05	0.2			A_75_P01059530	2	372276
A_75_P01059576		2	372751	-0.05	-0.11	0.29	-0.22			A_75_P01059576	2	372751
A_75_P01059659		2	373570	-0.22	-0.31	0.24	0.02			A_75_P01059659	2	373570
A_75_P01059743		2	374424	0	0.02	0.3	0.28			A_75_P01059743	2	374424
A_75_P01059845		2	375405	0.4	0.29	0.18	0.21			A_75_P01059845	2	375405
A_75_P01059911		2	376087	-0.01	0.08	-0.07	-0.03			A_75_P01059911	2	376087
A_75_P01059980		2	376798	0.02	0.02	-0.69	0.16			A_75_P01059980	2	376798
A_75_P01060078		2	377742	0.19	0.15	-0.38	-0.42			A_75_P01060078	2	377742
A_75_P01060141		2	378375	-0.05	-0.16	-0.86	-0.73			A_75_P01060141	2	378375
A_75_P01060226		2	379229	0.16	0.17	-0.9	-0.39			A_75_P01060226	2	379229
A_75_P01060320		2	380095	-0.15	-0.19	-0.08	-0.24			A_75_P01060320	2	380095
A_75_P01060405		2	380970	0.07	0.01	-0.12	-0.04			A_75_P01060405	2	380970
A_75_P01060485		2	381775	-0.01	-0.01	0.41	0.21			A_75_P01060485	2	381775
A_75_P01060523		2	382153	-0.31	-0.14	0.29	0.36			A_75_P01060523	2	382153
A_75_P01060583		2	382776	-0.23	-0.16	-0.54	0.09			A_75_P01060583	2	382776
A_75_P01060683		2	383765	-0.08	-0.1	-0.41	-0.17			A_75_P01060683	2	383765
A_75_P01060769		2	384640	-0.25	-0.37	-1.49	-0.45			A_75_P01060769	2	384640
A_75_P01060846		2	385404	0.05	-0.06	-0.8	-0.64			A_75_P01060846	2	385404
A_75_P01060908		2	386036	0.15	0.14	-0.92	-0.62			A_75_P01060908	2	386036
A_75_P01060979		2	386757	-0.26	-0.21	-0.06	0.25			A_75_P01060979	2	386757
A_75_P01061048		2	387469	0.2	0.14	-0.24	0.27			A_75_P01061048	2	387469
A_75_P01061134		2	388310	0.45	0.34	-0.67	-0.49			A_75_P01061134	2	388310
A_75_P01061207		2	389070	-0.04	0.13	0.19	0.55			A_75_P01061207	2	389070
A_75_P01061287		2	389885	0.43	0.33	0	0.31			A_75_P01061287	2	389885
A_75_P01061342		2	390463	0.21	0.32	-0.92	-0.31			A_75_P01061342	2	390463
A_75_P01061430		2	391312	-0.05	-0.09	0.11	0.17			A_75_P01061430	2	391312
A_75_P01061477		2	391775	0.07	0.31	0.26	-0.02			A_75_P01061477	2	391775
A_75_P01061538		2	392356	0.12	0	0.14	-0.2			A_75_P01061538	2	392356
A_75_P01061620		2	393175	-0.26	-0.24	0.24	-0.05			A_75_P01061620	2	393175
A_75_P01061688		2	393804	0.14	-0.02	-0.37	0.2			A_75_P01061688	2	393804
A_75_P01061755		2	394477	0.11	-0.08	0.32	0.16			A_75_P01061755	2	394477
A_75_P01061848		2	395496	0.6	0.64	0.19	0.01			A_75_P01061848	2	395496
A_75_P01061939		2	396452	0.01	-0.1	-0.05	0			A_75_P01061939	2	396452
A_75_P01062014		2	397188	0.01	-0.02	0.32	0.34			A_75_P01062014	2	397188
A_75_P01062064		2	397714	-0.11	-0.11	0.51	0.12			A_75_P01062064	2	397714
A_75_P01062145		2	398555	0.13	0.01	-0.23	0.4			A_75_P01062145	2	398555
A_75_P01062238		2	399498	0.41	0.43	0.3	0.04			A_75_P01062238	2	399498
A_75_P01062308		2	400229	-0.06	0	-0.03	0.14			A_75_P01062308	2	400229
A_75_P01062406		2	401239	-0.38	0.01	0.51	-0.1			A_75_P01062406	2	401239
A_75_P01062425		2	401429	0.3	0.38	-1	-0.84			A_75_P01062425	2	401429
A_75_P01062462		2	401810	-0.17	-0.29	-0.27	-0.15			A_75_P01062462	2	401810
A_75_P01062583		2	403001	-0.19	-0.07	-0.56	-0.15			A_75_P01062583	2	403001
A_75_P01062643		2	403579	-0.27	-0.15	-0.61	0.09			A_75_P01062643	2	403579
A_75_P01062699		2	404162	0.19	0.02	-0.56	-0.43			A_75_P01062699	2	404162
A_75_P01062785		2	405023	-0.05	-0.06	0.3	-0.08			A_75_P01062785	2	405023
A_75_P01062889		2	406060	-0.05	0.27	-0.07	0.29			A_75_P01062889	2	406060
A_75_P01062951		2	406699	0.13	0.04	-0.23	-0.1			A_75_P01062951	2	406699
A_75_P01063038		2	407578	-0.09	-0.04	-0.06	0.62			A_75_P01063038	2	407578
A_75_P01063120		2	408352	-0.26	-0.14	0.45	0.39			A_75_P01063120	2	408352
A_75_P01063261		2	409802	-0.01	-0.09	0.02	-0.04			A_75_P01063261	2	409802
A_75_P01063376		2	410922	-0.25	-0.09	-0.31	-0.33			A_75_P01063376	2	410922
A_75_P01063466		2	411808	-0.15	-0.25	0.39	0.06			A_75_P01063466	2	411808
A_75_P01063485		2	411986	-0.16	-0.11	-0.45	0.13			A_75_P01063485	2	411986
A_75_P01063524		2	412387	0.14	0.26	-0.29	-0.56			A_75_P01063524	2	412387
A_75_P01063595		2	413082	-0.18	-0.14	0.21	0.26			A_75_P01063595	2	413082
A_75_P01063676		2	413918	-0.08	0.01	-0.41	-0.05			A_75_P01063676	2	413918
A_75_P01063784		2	415011	-0.23	-0.23	0.29	-0.04			A_75_P01063784	2	415011
A_75_P01063863		2	415821	-0.63	-0.35	0.35	0.19			A_75_P01063863	2	415821
A_75_P01063920		2	416437	0.07	0.18	0.04	-0.03			A_75_P01063920	2	416437
A_75_P01064014		2	417390	-0.21	-0.23	0.32	0.51			A_75_P01064014	2	417390
A_75_P01064112		2	418361	0.11	0.09	0.52	0.14			A_75_P01064112	2	418361
A_75_P01064218		2	419444	0.39	0.42	-0.96	-0.56			A_75_P01064218	2	419444
A_75_P01064287		2	420160	0.39	0.27	0.59	0.6			A_75_P01064287	2	420160
A_75_P01064407		2	421407	-0.01	-0.07	-0.73	-0.5			A_75_P01064407	2	421407
A_75_P01064492		2	422332	-0.11	-0.35	0.04	0.02			A_75_P01064492	2	422332
A_75_P01064542		2	422805	-0.3	-0.45	0.02	0.28			A_75_P01064542	2	422805
A_75_P01064602		2	423395	-0.51	-0.56	-0.89	0.09			A_75_P01064602	2	423395
A_75_P01064702		2	424404	0.16	0	0.29	0.03			A_75_P01064702	2	424404
A_75_P01064756		2	424961	-0.32	-0.32	-0.22	-0.56			A_75_P01064756	2	424961
A_75_P01064833		2	425688	0.04	-0.04	-0.5	-0.23			A_75_P01064833	2	425688
A_75_P01064915		2	426535	0.39	0.37	-0.1	-0.32			A_75_P01064915	2	426535
A_75_P01064988		2	427297	0.13	-0.05	0.64	0.16			A_75_P01064988	2	427297
A_75_P01065089		2	428344	-0.22	0.19	0.18	0.21			A_75_P01065089	2	428344
A_75_P01065147		2	428945	-0.07	-0.03	0.01	0.01			A_75_P01065147	2	428945
A_75_P01065260		2	430031	0.15	0.11	-0.55	-0.7			A_75_P01065260	2	430031
A_75_P01065350		2	430989	-0.04	0.03	0.23	0.2			A_75_P01065350	2	430989
A_75_P01065455		2	432010	0.06	0.1	-0.29	-0.3			A_75_P01065455	2	432010
A_75_P01065531		2	432798	0.06	0.05	-0.21	0.4			A_75_P01065531	2	432798
A_75_P01065566		2	433129	-0.1	-0.21	0.01	0.08			A_75_P01065566	2	433129
A_75_P01065619		2	433647	-0.19	-0.19	-0.23	0.17			A_75_P01065619	2	433647
A_75_P01065732		2	434788	0.05	0.1	0.28	0.1			A_75_P01065732	2	434788
A_75_P01065813		2	435599	-0.01	0.22	-0.33	-0.22			A_75_P01065813	2	435599
A_75_P01065887		2	436355	0.14	0.11	-0.56	0.37			A_75_P01065887	2	436355
A_75_P01065957		2	437084	0.27	0.1	0.41	0.22			A_75_P01065957	2	437084
A_75_P01066061		2	438082	-0.18	-0.28	0.51	0.56			A_75_P01066061	2	438082
A_75_P01066130		2	438754	-0.21	-0.29	-1.13	0.18			A_75_P01066130	2	438754
A_75_P01066244		2	439847	-0.1	-0.19	0.24	-0.24			A_75_P01066244	2	439847
A_75_P01066303		2	440457	-0.06	-0.05	0.39	0.02			A_75_P01066303	2	440457
A_75_P01066392		2	441303	-0.4	-0.41	-0.75	0.05			A_75_P01066392	2	441303
A_75_P01066482		2	442245	0.15	0.27	0.27	0.09			A_75_P01066482	2	442245
A_75_P01066584		2	443314	-0.42	-0.3	0.53	-0.05			A_75_P01066584	2	443314
A_75_P01066612		2	443588	0.16	0.18	-0.62	-0.01			A_75_P01066612	2	443588
A_75_P01066679		2	444257	0.36	0.28		-1.29			A_75_P01066679	2	444257
A_75_P01066752		2	445030	-0.05	-0.11	0.53	0.18			A_75_P01066752	2	445030
A_75_P01066821		2	445725	0.11	0.05	-0.05	-0.11			A_75_P01066821	2	445725
A_75_P01066895		2	446434	0.41	0.39	0.25	0.03			A_75_P01066895	2	446434
A_75_P01067003		2	447554	-0.19	-0.24	0.25	0.51			A_75_P01067003	2	447554
A_75_P01067101		2	448558	-0.14	-0.25	-0.96	-0.57			A_75_P01067101	2	448558
A_75_P01067276		2	450302	-0.02	-0.06	0.2	-0.1			A_75_P01067276	2	450302
A_75_P01067350		2	451078	-0.22	-0.14	0.31	0.23			A_75_P01067350	2	451078
A_75_P01067410		2	451715	-0.31	-0.32	-0.28	0.17			A_75_P01067410	2	451715
A_75_P01067469		2	452318	0.02	-0.02	-0.81	-0.1			A_75_P01067469	2	452318
A_75_P01067532		2	452882	0.08	0.11	-1.12	-0.78			A_75_P01067532	2	452882
A_75_P01067558		2	453157	0.18	0.09	-0.32	0.07			A_75_P01067558	2	453157
A_75_P01067610		2	453654	0.12	0.02	0.31	-0.14			A_75_P01067610	2	453654
A_75_P01067693		2	454446	-0.27	-0.28		-1.31			A_75_P01067693	2	454446
A_75_P01067760		2	455154	0.53	0.44		-1.05			A_75_P01067760	2	455154
A_75_P01067858		2	456214	-0.03	-0.12	0.43	0.06			A_75_P01067858	2	456214
A_75_P01067927		2	456980	-0.34	0.07	0.63	-0.13			A_75_P01067927	2	456980
A_75_P01067998		2	457701	-0.07	-0.16	-0.92	-0.27			A_75_P01067998	2	457701
A_75_P01068086		2	458585	0.13	0.17	-0.23				A_75_P01068086	2	458585
A_75_P01068147		2	459253	-0.1	-0.04	-0.38	0.37			A_75_P01068147	2	459253
A_75_P01068210		2	459925	-0.07	-0.04	0.11	0.21			A_75_P01068210	2	459925
A_75_P01068281		2	460645	0.37	0.36	-0.01	0.04			A_75_P01068281	2	460645
A_75_P01068377		2	461661	0.03	0.08	0.64	0.27			A_75_P01068377	2	461661
A_75_P01068434		2	462224	-0.33	-0.28	-0.69	0.1			A_75_P01068434	2	462224
A_75_P01068457		2	462455	-0.39	-0.49	0.48	0			A_75_P01068457	2	462455
A_75_P01068507		2	462943	0.15	0.13	0.35	0.1			A_75_P01068507	2	462943
A_75_P01068580		2	463657	0	0.06	0.04	-0.21			A_75_P01068580	2	463657
A_75_P01068639		2	464259	0.31	0.25	-0.68	-0.21			A_75_P01068639	2	464259
A_75_P01068718		2	465097	-0.15	-0.11	-1.11	-1.38			A_75_P01068718	2	465097
A_75_P01068825		2	466160	-0.1	-0.27	-0.04	-0.32			A_75_P01068825	2	466160
A_75_P01068913		2	467060	-0.38	-0.4	-1.61	-1.44			A_75_P01068913	2	467060
A_75_P01068999		2	467938	-0.1	-0.1	-0.49	-0.96			A_75_P01068999	2	467938
A_75_P01069101		2	468982	-0.35	-0.38	-0.35	0.43			A_75_P01069101	2	468982
A_75_P01069184		2	469818	-0.23	-0.36	-0.12	0.08			A_75_P01069184	2	469818
A_75_P01069253		2	470518	-0.06	-0.07		-1.39			A_75_P01069253	2	470518
A_75_P01069343		2	471453	-0.36	-0.3	-0.92	-0.93			A_75_P01069343	2	471453
A_75_P01069422		2	472259	-0.24	-0.24	0.12	0.15			A_75_P01069422	2	472259
A_75_P01069446		2	472496	0.51	0.48	-0.16	-0.2			A_75_P01069446	2	472496
A_75_P01069492		2	472962	0.32	0.33	0.26	-0.05			A_75_P01069492	2	472962
A_75_P01069578		2	473848	-0.02	-0.05	-1.22	-1.11			A_75_P01069578	2	473848
A_75_P01069703		2	475139	0.18	0.1	0.29	0.1			A_75_P01069703	2	475139
A_75_P01069776		2	475896	0.17	0.02	0.02	0			A_75_P01069776	2	475896
A_75_P01069851		2	476678	-0.24	-0.34	0.08	0.07			A_75_P01069851	2	476678
A_75_P01069921		2	477386	0.02	0.45	0.33	-0.12			A_75_P01069921	2	477386
A_75_P01070090		2	479233	-0.25	-0.4	-0.59	-0.04			A_75_P01070090	2	479233
A_75_P01070190		2	480245	-0.27	-0.14	-0.98	-0.37			A_75_P01070190	2	480245
A_75_P01070274		2	481088	-0.22	-0.05	0.34	-0.09			A_75_P01070274	2	481088
A_75_P01070346		2	481827	0.33	0.27	-0.33	-0.78			A_75_P01070346	2	481827
A_75_P01070412		2	482464	0.3	0.16	0.45	0.08			A_75_P01070412	2	482464
A_75_P01070490		2	483224	-0.27	-0.14	0.37	0.17			A_75_P01070490	2	483224
A_75_P01070518		2	483533	-0.23	-0.2	-0.08	0.3			A_75_P01070518	2	483533
A_75_P01070591		2	484288	-0.19	-0.14	0.02	-0.06			A_75_P01070591	2	484288
A_75_P01070677		2	485202	0.06	0.09	-0.1	0.04			A_75_P01070677	2	485202
A_75_P01070758		2	486012	-0.09	-0.16		-1.44			A_75_P01070758	2	486012
A_75_P01070860		2	487057	-0.05	-0.11	0.07	0.24			A_75_P01070860	2	487057
A_75_P01070967		2	488160	0.15	0.21	-1.11	-0.41			A_75_P01070967	2	488160
A_75_P01071051		2	488955	0.15	0.12	0.12	0.1			A_75_P01071051	2	488955
A_75_P01071119		2	489725	-0.18	-0.1	0.38	0.15			A_75_P01071119	2	489725
A_75_P01071218		2	490788	0.18	0.16	0.11	0.3			A_75_P01071218	2	490788
A_75_P01071321		2	491806	0	0.06	-0.53	-0.87			A_75_P01071321	2	491806
A_75_P01071413		2	492772	0.27	0.24	-0.62	-0.12			A_75_P01071413	2	492772
A_75_P01071491		2	493640	0.12	0.1	0.52	0.08			A_75_P01071491	2	493640
A_75_P01071582		2	494549	0.06	0	0.18	0.32			A_75_P01071582	2	494549
A_75_P01071629		2	495007	-0.25	-0.18	-0.42	-0.2			A_75_P01071629	2	495007
A_75_P01071707		2	495794	0.35	0.38	0.13	0.03			A_75_P01071707	2	495794
A_75_P01071812		2	496784	0.25	0.24	-0.96	-0.89			A_75_P01071812	2	496784
A_75_P01071900		2	497631	-0.34	-0.17	-0.04	0.02			A_75_P01071900	2	497631
A_75_P01071971		2	498344	-0.11	0.02	-0.12	0.16			A_75_P01071971	2	498344
A_75_P01072052		2	499130	0	0.03	-0.31	-0.2			A_75_P01072052	2	499130
A_75_P01072111		2	499691	0.06	0	0.04	0.22			A_75_P01072111	2	499691
A_75_P01072205		2	500579	-0.09	0.06	-0.42	-0.18			A_75_P01072205	2	500579
A_75_P01072294		2	501534	0.02	-0.03		-1.3			A_75_P01072294	2	501534
A_75_P01072352		2	502111	0.38	0.34	0.29	0.32			A_75_P01072352	2	502111
A_75_P01072412		2	502727	0.11	0.45	0.61	0.54			A_75_P01072412	2	502727
A_75_P01072487		2	503488	-0.21	-0.32	-0.42	-0.09			A_75_P01072487	2	503488
A_75_P01072569		2	504372	0.07	0.15	-0.71	-0.54			A_75_P01072569	2	504372
A_75_P01072606		2	504697	0.38	0.4	0.14	-0.22			A_75_P01072606	2	504697
A_75_P01072655		2	505224	0.08	0.13	0.54	0.38			A_75_P01072655	2	505224
A_75_P01072733		2	506039	0.06	0.06	0.09				A_75_P01072733	2	506039
A_75_P01072832		2	507065	-0.09	0.01	0.08	-0.06			A_75_P01072832	2	507065
A_75_P01072894		2	507687	-0.54	-0.48	-0.55	-0.85			A_75_P01072894	2	507687
A_75_P01072963		2	508377	-0.1	-0.16	0.31	0.48			A_75_P01072963	2	508377
A_75_P01073052		2	509306	-0.07	-0.34	0.07	0			A_75_P01073052	2	509306
A_75_P01073140		2	510191	0.06	-0.01	0.35	0.72			A_75_P01073140	2	510191
A_75_P01073210		2	510839	0.18	0.24	0.33	0.12			A_75_P01073210	2	510839
A_75_P01073293		2	511682	-0.13	-0.11	-1.49	-1.45			A_75_P01073293	2	511682
A_75_P01073391		2	512656	-0.17	-0.07	-0.5	-0.3			A_75_P01073391	2	512656
A_75_P01073499		2	513784	-0.21	-0.04	-0.17	0.23			A_75_P01073499	2	513784
A_75_P01073587		2	514645	0.21	0.07	0.28	0.07			A_75_P01073587	2	514645
A_75_P01073615		2	514936	0.1	0.14	0.04	-0.1			A_75_P01073615	2	514936
A_75_P01073663		2	515423	-0.22	-0.06	-0.01	0			A_75_P01073663	2	515423
A_75_P01073769		2	516489	0.02	0.12	-0.5	-0.52			A_75_P01073769	2	516489
A_75_P01073834		2	517155	-0.07	-0.01	0.21	0.25			A_75_P01073834	2	517155
A_75_P01073902		2	517845	-0.48	-0.57	0.32	-0.6			A_75_P01073902	2	517845
A_75_P01073960		2	518410	0.15	0.12	0.1	0.02			A_75_P01073960	2	518410
A_75_P01074040		2	519273	-0.09	-0.21	0.32	-0.16			A_75_P01074040	2	519273
A_75_P01074119		2	520036	-0.21	-0.34	0.15	0.37			A_75_P01074119	2	520036
A_75_P01074218		2	521017	-0.39	-0.47	0.19	-0.12			A_75_P01074218	2	521017
A_75_P01074296		2	521806	-0.21	-0.1	-0.32	0.17			A_75_P01074296	2	521806
A_75_P01074401		2	522909	-0.2	-0.23	0.13	0.04			A_75_P01074401	2	522909
A_75_P01074472		2	523561	-0.04	-0.11	-0.5	-0.65			A_75_P01074472	2	523561
A_75_P01074549		2	524349	-0.12	-0.2	-0.88	-0.93			A_75_P01074549	2	524349
A_75_P01074564		2	524528	-0.07	-0.17	0.04	0.38			A_75_P01074564	2	524528
A_75_P01074632		2	525212	0.24	0.24	0.53	0.74			A_75_P01074632	2	525212
A_75_P01074729		2	526242	-0.34	-0.52	-0.26	0.05			A_75_P01074729	2	526242
A_75_P01074800		2	526914	-0.16	-0.15	-0.33	0			A_75_P01074800	2	526914
A_75_P01074880		2	527733	0.01	0.14	-0.44				A_75_P01074880	2	527733
A_75_P01074979		2	528755	-0.07	0.07	0.24	0.16			A_75_P01074979	2	528755
A_75_P01075116		2	530075	-0.15	-0.08	0.18	0.27			A_75_P01075116	2	530075
A_75_P01075223		2	531202	-0.64	-0.3	-2.72	-2.62			A_75_P01075223	2	531202
A_75_P01075288		2	531913	-0.03	-0.2	-1.77	-2.34			A_75_P01075288	2	531913
A_75_P01075360		2	532621	0.31	0.55	0.48	0.34			A_75_P01075360	2	532621
A_75_P01075427		2	533362	0.28	0.23	0.84	0.49			A_75_P01075427	2	533362
A_75_P01075499		2	534039	0.2	0.16	-0.66	-0.58			A_75_P01075499	2	534039
A_75_P01075564		2	534728	0.05	0.11	-0.16	0.14			A_75_P01075564	2	534728
A_75_P01075584		2	534919	-0.02	-0.15	-0.02	-0.2			A_75_P01075584	2	534919
A_75_P01075645		2	535548	-0.18	-0.14	0.5	0.44			A_75_P01075645	2	535548
A_75_P01075754		2	536664	0.36	0.38	0.41	0.24			A_75_P01075754	2	536664
A_75_P01075828		2	537420	-0.06	0.05	-0.8	-0.19			A_75_P01075828	2	537420
A_75_P01075917		2	538337	-0.34	-0.21	0.09	0.03			A_75_P01075917	2	538337
A_75_P01075991		2	539063	-0.22	-0.34	-0.76	-0.32			A_75_P01075991	2	539063
A_75_P01076077		2	539869	0.2	0.3	0.24	0.27			A_75_P01076077	2	539869
A_75_P01076167		2	540755	-0.09	-0.04	-0.17	0.09			A_75_P01076167	2	540755
A_75_P01076253		2	541612	0.23	0.27	-0.73	-0.53			A_75_P01076253	2	541612
A_75_P01076340		2	542501	-0.1	-0.09	0.35	0.28			A_75_P01076340	2	542501
A_75_P01076485		2	543906	0.32	0.17	0.44	0.33			A_75_P01076485	2	543906
A_75_P01076549		2	544549	-0.07	-0.13	-0.63	0.13			A_75_P01076549	2	544549
A_75_P01076563		2	544713	-0.31	-0.61	0.24	0.25			A_75_P01076563	2	544713
A_75_P01076609		2	545168	0.1	0.14	-0.02	0.06			A_75_P01076609	2	545168
A_75_P01076673		2	545819	-0.2	-0.34	0.15	0.46			A_75_P01076673	2	545819
A_75_P01076758		2	546643	0.33	0.09	-0.1	-0.11			A_75_P01076758	2	546643
A_75_P01076852		2	547592	0.22	0.12	0.19	-0.16			A_75_P01076852	2	547592
A_75_P01076975		2	548878	0.12	0.29	0.32	0.04			A_75_P01076975	2	548878
A_75_P01077046		2	549659	-0.09	-0.12	-0.24	-0.12			A_75_P01077046	2	549659
A_75_P01077150		2	550719	0.15	0.18	-0.41	-0.03			A_75_P01077150	2	550719
A_75_P01077271		2	551908	0.27	0.19	-0.17	-0.49			A_75_P01077271	2	551908
A_75_P01077371		2	552922	-0.02	0.08	0.39	0.23			A_75_P01077371	2	552922
A_75_P01077454		2	553740	0.03	-0.08	0.1	0.32			A_75_P01077454	2	553740
A_75_P01077531		2	554502	-0.02	0.05	0.49	0.16			A_75_P01077531	2	554502
A_75_P01077612		2	555332	-0.03	-0.18	0.15	0.04			A_75_P01077612	2	555332
A_75_P01077635		2	555544	0.18	0.21	-0.95	-0.28			A_75_P01077635	2	555544
A_75_P01077686		2	556075	0.05	-0.04	0.22	0.48			A_75_P01077686	2	556075
A_75_P01077760		2	556868	0.33	0.37	-0.61	-0.75			A_75_P01077760	2	556868
A_75_P01077816		2	557437	-0.05	-0.13	0.59	0.46			A_75_P01077816	2	557437
A_75_P01077910		2	558338	-0.46	-0.68	-0.6	-0.15			A_75_P01077910	2	558338
A_75_P01077971		2	558946	-0.12	-0.25	-1.33	-0.28			A_75_P01077971	2	558946
A_75_P01078041		2	559649	-0.51	-0.51	-0.57	-0.81			A_75_P01078041	2	559649
A_75_P01078121		2	560446	-0.22	-0.2	-0.83	-0.55			A_75_P01078121	2	560446
A_75_P01078199		2	561189	-0.49	-0.82	-0.23	0.07			A_75_P01078199	2	561189
A_75_P01078283		2	562031	0.05	-0.03	0.21	-0.05			A_75_P01078283	2	562031
A_75_P01078380		2	563048	-0.48	-0.52	-0.04	-0.16			A_75_P01078380	2	563048
A_75_P01078454		2	563796	0.02	0.03	0.08	0.15			A_75_P01078454	2	563796
A_75_P01078551		2	564792	-0.18	-0.14	0.6	-0.04			A_75_P01078551	2	564792
A_75_P01078576		2	565024	0.29	0.42	0.13	0.5			A_75_P01078576	2	565024
A_75_P01078624		2	565507	0.2	0.14	0.44	0			A_75_P01078624	2	565507
A_75_P01078719		2	566475	-0.06	-0.07	-0.29	-0.37			A_75_P01078719	2	566475
A_75_P01078799		2	567302	0.07	-0.19	0.31	0.29			A_75_P01078799	2	567302
A_75_P01078871		2	568039	-0.13	-0.01	0.29	-0.17			A_75_P01078871	2	568039
A_75_P01078966		2	568986	0.09	0.03	-0.1	-0.15			A_75_P01078966	2	568986
A_75_P01079068		2	570028	-0.09	-0.19	0.04	0.42			A_75_P01079068	2	570028
A_75_P01079134		2	570676	0.04	-0.05	-0.66	-0.42			A_75_P01079134	2	570676
A_75_P01079192		2	571286	-0.15	-0.71	0.1	-0.02			A_75_P01079192	2	571286
A_75_P01079277		2	572141	-0.48	-0.25	-0.39	0.05			A_75_P01079277	2	572141
A_75_P01079346		2	572798	0.13	0	0.43	0.24			A_75_P01079346	2	572798
A_75_P01079438		2	573679	-0.08	0.04	0.63	0.36			A_75_P01079438	2	573679
A_75_P01079519		2	574497	-0.2	-0.08	-0.02	-0.28			A_75_P01079519	2	574497
A_75_P01079543		2	574742	-0.11	-0.15	0.11	0.06			A_75_P01079543	2	574742
A_75_P01079637		2	575668	-0.46	-0.14	0.27	0.1			A_75_P01079637	2	575668
A_75_P01079736		2	576680	-0.05	0.01	0.43	0.29			A_75_P01079736	2	576680
A_75_P01079799		2	577325	0.01	0	0.32	0.16			A_75_P01079799	2	577325
A_75_P01079891		2	578250	-0.6	-0.06	0.57	-0.03			A_75_P01079891	2	578250
A_75_P01079977		2	579082	0.2	0.23	0.45	0.32			A_75_P01079977	2	579082
A_75_P01080036		2	579688	0.09	0.18	-0.24	-0.11			A_75_P01080036	2	579688
A_75_P01080109		2	580494	-0.01	0.12	0.7	0.18			A_75_P01080109	2	580494
A_75_P01080212		2	581538	-0.07	0	0.54	0.43			A_75_P01080212	2	581538
A_75_P01080295		2	582389	-0.15	-0.11	-0.2	0.15			A_75_P01080295	2	582389
A_75_P01080368		2	583145	0.02	-0.19	-0.72	-0.01			A_75_P01080368	2	583145
A_75_P01080508		2	584514	0.22	0.13	-0.98	-0.51			A_75_P01080508	2	584514
A_75_P01080568		2	585219	-0.1	-0.03	0.14	0.49			A_75_P01080568	2	585219
A_75_P01080590		2	585446	0.15	0.03	-0.57	-0.58			A_75_P01080590	2	585446
A_75_P01080643		2	585986	-0.15	-0.19	-0.3	0.2			A_75_P01080643	2	585986
A_75_P01080730		2	586873	0.29	0.18	0.41	0.27			A_75_P01080730	2	586873
A_75_P01080812		2	587689	-0.22	-0.21	-0.81	0.23			A_75_P01080812	2	587689
A_75_P01080893		2	588511	-0.39	-0.4	-0.05	-0.04			A_75_P01080893	2	588511
A_75_P01080976		2	589338	0.07	-0.03	-0.63	-0.12			A_75_P01080976	2	589338
A_75_P01081050		2	590108	0	-0.01	-0.39	-0.92			A_75_P01081050	2	590108
A_75_P01081142		2	591042	-0.1	-0.14	0.42	0.02			A_75_P01081142	2	591042
A_75_P01081202		2	591658	0.22	0.88	0.08	-0.04			A_75_P01081202	2	591658
A_75_P01081314		2	592805	0.03	-0.02	-0.87	-0.8			A_75_P01081314	2	592805
A_75_P01081373		2	593437	-0.15	-0.24	0.11	-0.41			A_75_P01081373	2	593437
A_75_P01081426		2	593999	-0.35	-0.17	0.19	-0.14			A_75_P01081426	2	593999
A_75_P01081495		2	594698	-0.07	-0.22	-0.74	-0.64			A_75_P01081495	2	594698
A_75_P01081514		2	594895	-0.43	-0.12	0.49	0.4			A_75_P01081514	2	594895
A_75_P01081583		2	595583	-0.04	-0.16	-0.35	0.21			A_75_P01081583	2	595583
A_75_P01081685		2	596538	0.19	0.09	0.04	-0.24			A_75_P01081685	2	596538
A_75_P01081769		2	597395	-0.25	-0.25	-0.69	-0.41			A_75_P01081769	2	597395
A_75_P01081832		2	597999	-0.02	-0.04	0.16	-0.1			A_75_P01081832	2	597999
A_75_P01081907		2	598743	-0.11	0.05	0.64	-0.03			A_75_P01081907	2	598743
A_75_P01082024		2	599869	-0.13	-0.09	0.17	-0.08			A_75_P01082024	2	599869
A_75_P01082131		2	600907	0.07	0.04	0.04	0.16			A_75_P01082131	2	600907
A_75_P01082213		2	601732	0.12	0.17	0.43	0			A_75_P01082213	2	601732
A_75_P01082277		2	602327	0.18	0.32	0.61	-0.11			A_75_P01082277	2	602327
A_75_P01082352		2	603111	0.2	0.25	0.17	0.16			A_75_P01082352	2	603111
A_75_P01082424		2	603874	0.07	-0.09	-0.05	0.57			A_75_P01082424	2	603874
A_75_P01082514		2	604758	0.4	0.06	-0.06	-0.26			A_75_P01082514	2	604758
A_75_P01082547		2	605094	0.27	0.35	0.67	0.08			A_75_P01082547	2	605094
A_75_P01082597		2	605631	-0.02	-0.04	0.44	0.18			A_75_P01082597	2	605631
A_75_P01082698		2	606670	-0.05	-0.16	-0.32	0.03			A_75_P01082698	2	606670
A_75_P01082752		2	607248	-0.01	-0.03	-0.79	-1.62			A_75_P01082752	2	607248
A_75_P01082824		2	607955	0.01	-0.04	-0.15	-0.39			A_75_P01082824	2	607955
A_75_P01082915		2	608872	-0.18	-0.09	0.62	-0.15			A_75_P01082915	2	608872
A_75_P01082992		2	609676	0.31	0.28	0.16	0.09			A_75_P01082992	2	609676
A_75_P01083062		2	610380	-0.34	-0.27	0.18	-0.05			A_75_P01083062	2	610380
A_75_P01083129		2	611082	0.04	0.04	-0.11	-0.27			A_75_P01083129	2	611082
A_75_P01083188		2	611702	0.22	0.21	-0.27	-0.41			A_75_P01083188	2	611702
A_75_P01083266		2	612581	-0.09	-0.09	-0.32	0.38			A_75_P01083266	2	612581
A_75_P01083341		2	613383	0.06	0.02	-0.73	-1.76			A_75_P01083341	2	613383
A_75_P01083436		2	614327	-0.04	-0.11	-1	-0.67			A_75_P01083436	2	614327
A_75_P01083465		2	614628	-0.19	-0.18		-1.5			A_75_P01083465	2	614628
A_75_P01083524		2	615239	0.25	0.28	0.4	-0.18			A_75_P01083524	2	615239
A_75_P01083602		2	616044	-0.1	0.04	0.2	-0.05			A_75_P01083602	2	616044
A_75_P01083683		2	616855	0.16	0.17	0.12	-0.18			A_75_P01083683	2	616855
A_75_P01083755		2	617588	0.05	-0.01	-0.53	-1.02			A_75_P01083755	2	617588
A_75_P01083834		2	618434	0.46	0.45	0.38	0			A_75_P01083834	2	618434
A_75_P01083931		2	619416	0.22	0.22	0.21	0.68			A_75_P01083931	2	619416
A_75_P01084002		2	620150	-0.26	-0.26	-0.87	-0.19			A_75_P01084002	2	620150
A_75_P01084083		2	620993	-0.41	-0.28	0.11	0.16			A_75_P01084083	2	620993
A_75_P01084154		2	621715	0.12	0.13	-0.25	-1.14			A_75_P01084154	2	621715
A_75_P01084210		2	622308	-0.75	0.05	0.56	-0.03			A_75_P01084210	2	622308
A_75_P01084315		2	623319	-0.13	-0.2	0.2	0.55			A_75_P01084315	2	623319
A_75_P01084391		2	624084	0.03	0.05	-0.23	0.12			A_75_P01084391	2	624084
A_75_P01084423		2	624451	0.03	-0.04	-0.31	-0.3			A_75_P01084423	2	624451
A_75_P01084462		2	624857	0.03	-0.04	-0.09	0.14			A_75_P01084462	2	624857
A_75_P01084549		2	625735	0.23	0.3	-0.48	-1.34			A_75_P01084549	2	625735
A_75_P01084640		2	626598	0.22	0.1	0.29	0.62			A_75_P01084640	2	626598
A_75_P01084718		2	627342	-0.12	0.09	-0.03	0.08			A_75_P01084718	2	627342
A_75_P01084813		2	628273	0.42	0.33	-0.82	-0.52			A_75_P01084813	2	628273
A_75_P01084869		2	628922	-0.1	-0.15	-0.1	0.01			A_75_P01084869	2	628922
A_75_P01084932		2	629544	-0.07	0.01	0.43	0.37			A_75_P01084932	2	629544
A_75_P01085023		2	630480	-0.37	-0.1	0.06	0.17			A_75_P01085023	2	630480
A_75_P01085121		2	631539	-0.26	-0.13	0.05	0.13			A_75_P01085121	2	631539
A_75_P01085221		2	632568	-0.06	-0.06	-0.22	-0.21			A_75_P01085221	2	632568
A_75_P01085279		2	633155	-0.27	-0.42	0.06	-0.24			A_75_P01085279	2	633155
A_75_P01085364		2	634067	-0.03	-0.05	0.08	0.02			A_75_P01085364	2	634067
A_75_P01085421		2	634641	-0.12	-0.11	-0.07	-0.09			A_75_P01085421	2	634641
A_75_P01085492		2	635379	0.11	0.03	0.37	0.12			A_75_P01085492	2	635379
A_75_P01085547		2	635935	0.33	0.08	-0.69	-0.08			A_75_P01085547	2	635935
A_75_P01085646		2	636904	0.2	0.17	-0.42	-0.39			A_75_P01085646	2	636904
A_75_P01085766		2	638149	-0.05	0.1	0.45	0.06			A_75_P01085766	2	638149
A_75_P01085852		2	639042	-0.01	-0.01	-0.6	-0.41			A_75_P01085852	2	639042
A_75_P01085941		2	639905	-0.37	0	0.15	0.16			A_75_P01085941	2	639905
A_75_P01086030		2	640780	0.04	0	0.32	0.19			A_75_P01086030	2	640780
A_75_P01086102		2	641479	-0.23	-0.07	-0.79	-0.21			A_75_P01086102	2	641479
A_75_P01086203		2	642528	0.11	0.06	-0.66	-0.49			A_75_P01086203	2	642528
A_75_P01086325		2	643801	-0.13	0.14	1.09	1.1			A_75_P01086325	2	643801
A_75_P01086439		2	644960	-0.26	-0.35	0.49	1.02			A_75_P01086439	2	644960
A_75_P01086473		2	645276	-0.06	-0.1	-0.42	-0.04			A_75_P01086473	2	645276
A_75_P01086541		2	645947	-0.17	0.34	0.66	0.29			A_75_P01086541	2	645947
A_75_P01086619		2	646726	0.12	0.05	0.04	0.02			A_75_P01086619	2	646726
A_75_P01086683		2	647346	-0.09	-0.2	-0.12	-0.06			A_75_P01086683	2	647346
A_75_P01086751		2	648045	-0.15	-0.01	0.03	0.27			A_75_P01086751	2	648045
A_75_P01086840		2	648947	-0.02	0	0.16	0.29			A_75_P01086840	2	648947
A_75_P01086921		2	649746	0.11	-0.11	0.44	0.08			A_75_P01086921	2	649746
A_75_P01086989		2	650429	0.25	0.35	0.16	0.02			A_75_P01086989	2	650429
A_75_P01087074		2	651249	0.07	0.09	-0.34	0.17			A_75_P01087074	2	651249
A_75_P01087188		2	652386	0.18	0.26	0.6	0.28			A_75_P01087188	2	652386
A_75_P01087268		2	653243	-0.12	0.1	0.17	0.37			A_75_P01087268	2	653243
A_75_P01087374		2	654300	0.02	-0.06	-1.13	-0.77			A_75_P01087374	2	654300
A_75_P01087458		2	655169	-0.03	-0.08	0.38	0.27			A_75_P01087458	2	655169
A_75_P01087486		2	655471	-0.14	-0.21	-0.25	-0.15			A_75_P01087486	2	655471
A_75_P01087536		2	655973	-0.18	-0.16	-0.59	-0.67			A_75_P01087536	2	655973
A_75_P01087661		2	657251	0.21	-0.04	-0.47	-0.3			A_75_P01087661	2	657251
A_75_P01087747		2	658061	-0.43	-0.41		-1.47			A_75_P01087747	2	658061
A_75_P01087831		2	658929	0.31	0.28	0.23	-0.06			A_75_P01087831	2	658929
A_75_P01087915		2	659798	0.16	0.11	-0.72	-0.46			A_75_P01087915	2	659798
A_75_P01088000		2	660701	-0.15	-0.04	0.11	-0.1			A_75_P01088000	2	660701
A_75_P01088096		2	661690	0.08	0	0.09	0.14			A_75_P01088096	2	661690
A_75_P01088160		2	662404	0.11	0.13	0.15	-0.18			A_75_P01088160	2	662404
A_75_P01088245		2	663291	0.05	0.06	0.01	-0.3			A_75_P01088245	2	663291
A_75_P01088354		2	664460	0.02	0.03	0.27	0.33			A_75_P01088354	2	664460
A_75_P01088450		2	665449	-0.15	-0.36	-1.3	-0.27			A_75_P01088450	2	665449
A_75_P01088530		2	666238	-0.53	-0.27	0.5	0.02			A_75_P01088530	2	666238
A_75_P01088560		2	666538	-0.28	-0.35	0.47	-0.03			A_75_P01088560	2	666538
A_75_P01088609		2	667069	0.19	0.12	0.14	0.3			A_75_P01088609	2	667069
A_75_P01088682		2	667802	-0.12	0.03	0.28	-0.32			A_75_P01088682	2	667802
A_75_P01088793		2	668973	-0.14	-0.02	0.31				A_75_P01088793	2	668973
A_75_P01088884		2	669847	0.02	0.06	-0.05	-0.11			A_75_P01088884	2	669847
A_75_P01088978		2	670742	0.27	0.29	-0.01	-0.04			A_75_P01088978	2	670742
A_75_P01089049		2	671488	0.15	0.2	0.06	0.16			A_75_P01089049	2	671488
A_75_P01089124		2	672238	0.17	0.17	-0.49	-0.31			A_75_P01089124	2	672238
A_75_P01089214		2	673166	-0.29	-0.42	0.36	0.24			A_75_P01089214	2	673166
A_75_P01089303		2	674053	0.22	0.25	0.26	0.4			A_75_P01089303	2	674053
A_75_P01089405		2	675071	-0.08	-0.15	0.1	0.44			A_75_P01089405	2	675071
A_75_P01089468		2	675722	-0.3	-0.3	0.41	0.35			A_75_P01089468	2	675722
A_75_P01089558		2	676583	0.35	0.28	-0.05	0.2			A_75_P01089558	2	676583
A_75_P01089582		2	676820	-0.2	-0.33	-0.75	-0.32			A_75_P01089582	2	676820
A_75_P01089639		2	677374	0.07	0.11	0.46	0.18			A_75_P01089639	2	677374
A_75_P01089719		2	678186	-0.15	-0.27	0.3	-0.16			A_75_P01089719	2	678186
A_75_P01089793		2	678928	0.17	0.07	-0.51	-0.32			A_75_P01089793	2	678928
A_75_P01089902		2	679940	0.29	0.14	0.51	0.08			A_75_P01089902	2	679940
A_75_P01090009		2	681037	-0.05	0.09	0.28	0.25			A_75_P01090009	2	681037
A_75_P01090113		2	682096	-0.14	-0.05	-1.04	0.06			A_75_P01090113	2	682096
A_75_P01090179		2	682831	0.09	0.23	0.35	0.07			A_75_P01090179	2	682831
A_75_P01090246		2	683570	0.14	0.18	0.29	-0.18			A_75_P01090246	2	683570
A_75_P01090333		2	684424	0.11	0.1	0.32	0.56			A_75_P01090333	2	684424
A_75_P01090426		2	685395	0.15	0.07	-0.74	-0.58			A_75_P01090426	2	685395
A_75_P01090516		2	686332	0.19	0.06	0.32	0.14			A_75_P01090516	2	686332
A_75_P01090597		2	687147	0.21	0.12	-0.57	-0.9			A_75_P01090597	2	687147
A_75_P01090616		2	687333	0.29	0.02	-0.6	-0.91			A_75_P01090616	2	687333
A_75_P01090663		2	687804	0.2	0.37	0.55	0.47			A_75_P01090663	2	687804
A_75_P01090759		2	688755	-0.02	-0.21	-1.03	-0.88			A_75_P01090759	2	688755
A_75_P01090831		2	689510	-0.05	0.03	0.4	0.41			A_75_P01090831	2	689510
A_75_P01090918		2	690427	0.01	0	-0.73	-1.08			A_75_P01090918	2	690427
A_75_P01090974		2	690989	-0.1	-0.04	0.12	-0.2			A_75_P01090974	2	690989
A_75_P01091062		2	691851	-0.24	-0.22	0.98	0.6			A_75_P01091062	2	691851
A_75_P01091130		2	692552	-0.16	-0.23	0.15	0.55			A_75_P01091130	2	692552
A_75_P01091235		2	693629	-0.23	-0.3	-0.22	0.2			A_75_P01091235	2	693629
A_75_P01091344		2	694675	-0.65	-0.46	1.05	0.47			A_75_P01091344	2	694675
A_75_P01091419		2	695449	0.21	0.54	0.01	-0.08			A_75_P01091419	2	695449
A_75_P01091505		2	696349	0.36	0.28	-0.77	-0.94			A_75_P01091505	2	696349
A_75_P01091609		2	697388	-0.08	0.08	0.72	0.57			A_75_P01091609	2	697388
A_75_P01091628		2	697596	-0.41	-0.13	0.52	0.53			A_75_P01091628	2	697596
A_75_P01091687		2	698171	0	-0.06	0.06	-0.22			A_75_P01091687	2	698171
A_75_P01091755		2	698879	0.3	0.23	-0.28	-0.31			A_75_P01091755	2	698879
A_75_P01091851		2	699887	0.34	0.28	-0.93	-0.11			A_75_P01091851	2	699887
A_75_P01091936		2	700731	-0.25	0.05	0.27	0.17			A_75_P01091936	2	700731
A_75_P01092019		2	701590	0.35	0.26	-0.31	-0.62			A_75_P01092019	2	701590
A_75_P01092082		2	702232	0.01	-0.08	-0.5	-0.4			A_75_P01092082	2	702232
A_75_P01092147		2	702970	-0.08	-0.11	0.36	-0.11			A_75_P01092147	2	702970
A_75_P01092241		2	703991	0.52	0.53	-0.67	-0.29			A_75_P01092241	2	703991
A_75_P01092314		2	704716	-0.1	0.09	0.15	-0.23			A_75_P01092314	2	704716
A_75_P01092401		2	705619	0.12	0.06	-0.04	-0.31			A_75_P01092401	2	705619
A_75_P01092485		2	706470	-0.21	-0.31	-0.79	-1.1			A_75_P01092485	2	706470
A_75_P01092550		2	707114	0.21	0.07	0.05	0.06			A_75_P01092550	2	707114
A_75_P01092591		2	707523	0.17	0.08	0.31	0.45			A_75_P01092591	2	707523
A_75_P01092654		2	708159	0.26	0.15	0.38	0.07			A_75_P01092654	2	708159
A_75_P01092724		2	708819	-0.09	0.14	0.51	0.39			A_75_P01092724	2	708819
A_75_P01092827		2	709781	0.24	0.2	0.08	-0.18			A_75_P01092827	2	709781
A_75_P01092890		2	710428	-0.31	-0.03	0.31	0.2			A_75_P01092890	2	710428
A_75_P01092984		2	711467	0	-0.12	-0.03	0.28			A_75_P01092984	2	711467
A_75_P01093072		2	712323	0.27	0.2	-0.29	0			A_75_P01093072	2	712323
A_75_P01093140		2	713026	0.16	0.19	-0.54	-0.06			A_75_P01093140	2	713026
A_75_P01093284		2	714476	-0.29	-0.28	-0.73	-0.75			A_75_P01093284	2	714476
A_75_P01093346		2	715159	0.47	0.37	-0.27	-0.2			A_75_P01093346	2	715159
A_75_P01093429		2	716045	-0.48	0.38	0.32	0			A_75_P01093429	2	716045
A_75_P01093537		2	717078	-0.02	-0.04	-0.58	-0.23			A_75_P01093537	2	717078
A_75_P01093610		2	717863	-0.18	0.05	0.33	-0.03			A_75_P01093610	2	717863
A_75_P01093645		2	718234	-0.17	-0.24	-0.86	-0.35			A_75_P01093645	2	718234
A_75_P01093686		2	718702	-0.27	-0.16	-1.55	-0.76			A_75_P01093686	2	718702
A_75_P01093784		2	719693	-0.09	0.03	-0.35	-0.22			A_75_P01093784	2	719693
A_75_P01093846		2	720315	-0.08	-0.12	0.19	-0.3			A_75_P01093846	2	720315
A_75_P01093908		2	720940	-0.26	-0.23	0.03	-0.39			A_75_P01093908	2	720940
A_75_P01093964		2	721507	-0.31	-0.12	-0.82	-0.17			A_75_P01093964	2	721507
A_75_P01094072		2	722553	-0.38	-0.23	0.4	0.19			A_75_P01094072	2	722553
A_75_P01094146		2	723288	-0.09	-0.21	-0.67	-0.88			A_75_P01094146	2	723288
A_75_P01094214		2	723943	0.01	-0.03	-1.44	-0.43			A_75_P01094214	2	723943
A_75_P01094273		2	724534	0.24	0.16	-0.65	-0.21			A_75_P01094273	2	724534
A_75_P01094351		2	725306	-0.09	-0.11	-0.17	-0.22			A_75_P01094351	2	725306
A_75_P01094450		2	726317	-0.23	-0.21	-0.36	-0.28			A_75_P01094450	2	726317
A_75_P01094567		2	727443	-0.06	0.17	0.36	0.21			A_75_P01094567	2	727443
A_75_P01094585		2	727647	-0.02	0.06	0.06	-0.19			A_75_P01094585	2	727647
A_75_P01094618		2	728020	-0.12	-0.1	-0.47	-0.81			A_75_P01094618	2	728020
A_75_P01094685		2	728723	-0.32	-0.38	-0.57	0.13			A_75_P01094685	2	728723
A_75_P01094834		2	730242	-0.59	-0.67	0.19	-0.44			A_75_P01094834	2	730242
A_75_P01094940		2	731284	0.42	0.25	-0.23	0			A_75_P01094940	2	731284
A_75_P01095008		2	731972	-0.08	0.06	0.45	0.17			A_75_P01095008	2	731972
A_75_P01095113		2	733039	-0.03	-0.07	0.16	-0.02			A_75_P01095113	2	733039
A_75_P01095188		2	733774	0.16	0.1	0.15	0.24			A_75_P01095188	2	733774
A_75_P01095269		2	734570	0.25	0.23	0.38	-0.05			A_75_P01095269	2	734570
A_75_P01095371		2	735599	0.34	0.35	0.24	-0.06			A_75_P01095371	2	735599
A_75_P01095443		2	736352	0.06	0	-0.58	-0.33			A_75_P01095443	2	736352
A_75_P01095543		2	737364	0.05	0.09	-0.12	-0.17			A_75_P01095543	2	737364
A_75_P01095563		2	737573	0.14	0.07	0.32	0.03			A_75_P01095563	2	737573
A_75_P01095605		2	738044	-0.09	-0.12	-0.94	-0.35			A_75_P01095605	2	738044
A_75_P01095693		2	738932	0.24	0.35	-0.04	0.06			A_75_P01095693	2	738932
A_75_P01095775		2	739753	-0.22	-0.18	-0.78	-0.02			A_75_P01095775	2	739753
A_75_P01095851		2	740529	0.39	0.29	-0.63	-0.39			A_75_P01095851	2	740529
A_75_P01095950		2	741546	0.1	0.16	-0.69	0.06			A_75_P01095950	2	741546
A_75_P01096049		2	742544	0.14	0.19	0.34	0.39			A_75_P01096049	2	742544
A_75_P01096125		2	743309	-0.36	-0.2	0.04	-0.03			A_75_P01096125	2	743309
A_75_P01096257		2	744609	0.08	0.05	0.23	0.44			A_75_P01096257	2	744609
A_75_P01096316		2	745205	-0.07	-0.07	0.03	0.19			A_75_P01096316	2	745205
A_75_P01096407		2	746156	-0.14	-0.25	-0.8	-0.4			A_75_P01096407	2	746156
A_75_P01096516		2	747230	0.24	0.18	-0.47	-0.27			A_75_P01096516	2	747230
A_75_P01096631		2	748416	0.1	0.14	0.47	-0.02			A_75_P01096631	2	748416
A_75_P01096648		2	748609	0.17	0.09	-0.09	-0.18			A_75_P01096648	2	748609
A_75_P01096714		2	749276	0.12	0.05	-0.32	-0.3			A_75_P01096714	2	749276
A_75_P01096795		2	750100	0.19	0.24	-1.42	-0.81			A_75_P01096795	2	750100
A_75_P01096888		2	751026	-0.4	0.04	0.72	0.35			A_75_P01096888	2	751026
A_75_P01096981		2	751963	0.24	0.37	0.26	-0.07			A_75_P01096981	2	751963
A_75_P01097070		2	752872	0.21	0.27	0.26	0.05			A_75_P01097070	2	752872
A_75_P01097148		2	753658	-0.21	-0.12	-0.1	0.21			A_75_P01097148	2	753658
A_75_P01097219		2	754363	-0.06	-0.09	0.37	0.3			A_75_P01097219	2	754363
A_75_P01097292		2	755117	-0.27	-0.23	-0.56	-0.51			A_75_P01097292	2	755117
A_75_P01097368		2	755943	-0.37	-0.54	-1.16	-0.45			A_75_P01097368	2	755943
A_75_P01097442		2	756682	-0.1	-0.19	0.39	0			A_75_P01097442	2	756682
A_75_P01097533		2	757610	0.39	0.31	0.21	0.13			A_75_P01097533	2	757610
A_75_P01097617		2	758457	-0.27	-0.31	-0.33	-0.03			A_75_P01097617	2	758457
A_75_P01097635		2	758628	-0.37	0.17	0.32	0.19			A_75_P01097635	2	758628
A_75_P01097694		2	759236	-0.04	-0.05	-0.6	-1.25			A_75_P01097694	2	759236
A_75_P01097793		2	760230	-0.36	-0.33	-0.19	0.48			A_75_P01097793	2	760230
A_75_P01097860		2	760907	-0.44	-0.04	0.51	0.28			A_75_P01097860	2	760907
A_75_P01097955		2	761893	0.21	-0.03	-0.08	0.28			A_75_P01097955	2	761893
A_75_P01098034		2	762707	-0.27	0	0.36	0.2			A_75_P01098034	2	762707
A_75_P01098144		2	763781	0.25	0.16	0.37	0.15			A_75_P01098144	2	763781
A_75_P01098237		2	764710	0.43	0.34	-0.76	-0.88			A_75_P01098237	2	764710
A_75_P01098318		2	765554	-0.2	-0.15	-0.08	0.02			A_75_P01098318	2	765554
A_75_P01098401		2	766397	0.07	-0.04	-0.29	-0.51			A_75_P01098401	2	766397
A_75_P01098481		2	767204	-0.01	0.07	-0.5	0.34			A_75_P01098481	2	767204
A_75_P01098555		2	767937	0.15	0.01		-1.23			A_75_P01098555	2	767937
A_75_P01098620		2	768598	0.2	0.11	0.21	-0.01			A_75_P01098620	2	768598
A_75_P01098641		2	768815	0.04	0.01	-1.91	-0.69			A_75_P01098641	2	768815
A_75_P01098709		2	769482	0.11	-0.02	-0.08	0.42			A_75_P01098709	2	769482
A_75_P01098798		2	770332	-0.23	0.05	0.3	0.2			A_75_P01098798	2	770332
A_75_P01098879		2	771160	-0.03	0.1	0.3	0.08			A_75_P01098879	2	771160
A_75_P01098960		2	771994	-0.1	-0.24	0.08	-0.01			A_75_P01098960	2	771994
A_75_P01099058		2	772966	-0.14	-0.17	0.03	0.15			A_75_P01099058	2	772966
A_75_P01099147		2	773834	-0.03	-0.02	-1	-0.33			A_75_P01099147	2	773834
A_75_P01099213		2	774522	-0.43	-0.51	-0.57	-0.47			A_75_P01099213	2	774522
A_75_P01099304		2	775449	0.26	0.23	-0.63	0.04			A_75_P01099304	2	775449
A_75_P01099419		2	776639	-0.25	-0.13	0.27	0.04			A_75_P01099419	2	776639
A_75_P01099514		2	777550	-0.01	0.09	-0.64	-0.2			A_75_P01099514	2	777550
A_75_P01099610		2	778548	0.02	0.06	0.3	-0.22			A_75_P01099610	2	778548
A_75_P01099665		2	779106	-0.33	-0.26	-0.83	-1.17			A_75_P01099665	2	779106
A_75_P01099700		2	779461	0.06	0.18	0.23	0.24			A_75_P01099700	2	779461
A_75_P01099754		2	779987	-0.24	0.14	0.1	0.08			A_75_P01099754	2	779987
A_75_P01099839		2	780884	-0.53	-0.41	-0.72	-0.08			A_75_P01099839	2	780884
A_75_P01099928		2	781781	0.18	0.22	-0.05	-0.33			A_75_P01099928	2	781781
A_75_P01100004		2	782555	-0.01	-0.13	0	0.11			A_75_P01100004	2	782555
A_75_P01100088		2	783463	-0.31	-0.12	0.39	0.22			A_75_P01100088	2	783463
A_75_P01100222		2	784781	-0.33	-0.29	-0.87	-0.25			A_75_P01100222	2	784781
A_75_P01100300		2	785574	-0.04	0.08	-0.65	-0.12			A_75_P01100300	2	785574
A_75_P01100394		2	786499	0.3	0.22	0.33	0.19			A_75_P01100394	2	786499
A_75_P01100461		2	787168	-0.1	-0.25	0.15	0.22			A_75_P01100461	2	787168
A_75_P01100536		2	787930	-0.27	-0.21	-0.01	0.23			A_75_P01100536	2	787930
A_75_P01100637		2	788900	0.07	0.19	-0.11	0.13			A_75_P01100637	2	788900
A_75_P01100726		2	789779	0.18	0.13	-0.03	0.13			A_75_P01100726	2	789779
A_75_P01100745		2	789959	-0.21	-0.02	0.12	0.08			A_75_P01100745	2	789959
A_75_P01100792		2	790472	0.05	0.03	-0.67	-0.37			A_75_P01100792	2	790472
A_75_P01100869		2	791291	-0.13	-0.14	0.36	0.06			A_75_P01100869	2	791291
A_75_P01100932		2	791974	-0.23	0	0.5	0.52			A_75_P01100932	2	791974
A_75_P01100997		2	792609	-0.11	0.03	0.61	0.05			A_75_P01100997	2	792609
A_75_P01101060		2	793335	-0.07	-0.11	-0.23	0.68			A_75_P01101060	2	793335
A_75_P01101144		2	794196	-0.21	-0.22	-0.61	-0.01			A_75_P01101144	2	794196
A_75_P01101244		2	795222	0.55	0.49	0.15	0.27			A_75_P01101244	2	795222
A_75_P01101361		2	796407	-0.16	-0.07	0.16	0.3			A_75_P01101361	2	796407
A_75_P01101438		2	797139	0.11	0.05	-0.53	-0.94			A_75_P01101438	2	797139
A_75_P01101513		2	797903	0.12	-0.05	0.27	0.23			A_75_P01101513	2	797903
A_75_P01101610		2	798832	0.08	0.06	-0.12	-0.01			A_75_P01101610	2	798832
A_75_P01101715		2	799905	0.05	-0.22	0.31	0.12			A_75_P01101715	2	799905
A_75_P01101746		2	800225	0.06	0.28	0.37	0.09			A_75_P01101746	2	800225
A_75_P01101811		2	800872	-0.15	-0.22	0.41	0.07			A_75_P01101811	2	800872
A_75_P01101907		2	801855	0.17	0.31	0.87	0.58			A_75_P01101907	2	801855
A_75_P01102012		2	802934	0	-0.17	-0.36	0.07			A_75_P01102012	2	802934
A_75_P01102091		2	803689	-0.02	-0.14	1.21	1.18			A_75_P01102091	2	803689
A_75_P01102174		2	804601	0.15	0.06	0.21	0.48			A_75_P01102174	2	804601
A_75_P01102543		2	808296	0.16	0.26	0.6	0.59			A_75_P01102543	2	808296
A_75_P01103118		3	1147	0.39	0.36	0.27	0.09			A_75_P01103118	3	1147
A_75_P01103195		3	1930	0.14	0.05	0.16	0.18			A_75_P01103195	3	1930
A_75_P01103251		3	2502	-0.22	-0.03	0.08	0.17			A_75_P01103251	3	2502
A_75_P01103334		3	3347	0.26	0.34	0.04	0.32			A_75_P01103334	3	3347
A_75_P01103421		3	4294	0.15	0.03	-0.14	-0.19			A_75_P01103421	3	4294
A_75_P01103535		3	5386	0.16	0.07	-0.85	-0.65			A_75_P01103535	3	5386
A_75_P01103542		3	5444	-0.32	-0.4	-0.24	0.06			A_75_P01103542	3	5444
A_75_P01103837		3	8317	0.47	0.45	-0.6	-1.04			A_75_P01103837	3	8317
A_75_P01103926		3	9230	-0.39	-0.38	-1.43	-0.86			A_75_P01103926	3	9230
A_75_P01104398		3	13987	-0.14	-0.18	0.08	0.24			A_75_P01104398	3	13987
A_75_P01104456		3	14595	-0.11	-0.06	-0.12	-1.39			A_75_P01104456	3	14595
A_75_P01104542		3	15480	-0.19	-0.09	0.31	0.27			A_75_P01104542	3	15480
A_75_P01104648		3	16495	0.25	0.26	0.07	0.19			A_75_P01104648	3	16495
A_75_P01104721		3	17226	0.2	0.1	-0.48	-0.46			A_75_P01104721	3	17226
A_75_P01104812		3	18101	0.31	0.28	-0.08	0.31			A_75_P01104812	3	18101
A_75_P01104893		3	18949	-0.1	0.14	-0.27	-0.01			A_75_P01104893	3	18949
A_75_P01104994		3	19945	0.23	0.14	-1.01	-1.01			A_75_P01104994	3	19945
A_75_P01105099		3	20998	0.24	0.15	0.43	0.16			A_75_P01105099	3	20998
A_75_P01105190		3	21907	-0.06	-0.12	-0.34	-0.76			A_75_P01105190	3	21907
A_75_P01105209		3	22093	-0.27	-0.4	-0.38	0.27			A_75_P01105209	3	22093
A_75_P01105282		3	22853	-0.05	-0.02	0.08	0.37			A_75_P01105282	3	22853
A_75_P01105363		3	23680	-0.6	-0.35	0.52	0.3			A_75_P01105363	3	23680
A_75_P01105444		3	24565	-0.08	-0.21	-0.29	0.24			A_75_P01105444	3	24565
A_75_P01105533		3	25458	0.03	-0.08	0.41	0.02			A_75_P01105533	3	25458
A_75_P01105592		3	26066	-0.15	-0.11	-0.68	-0.47			A_75_P01105592	3	26066
A_75_P01105791		3	28043	-0.23	-0.31	0.54	0.27			A_75_P01105791	3	28043
A_75_P01105871		3	28882	-0.16	-0.01	0.4	0.46			A_75_P01105871	3	28882
A_75_P01105971		3	29841	-0.43	-0.17	0.06	-0.04			A_75_P01105971	3	29841
A_75_P01106034		3	30473	-0.41	-0.36	-0.45	0.45			A_75_P01106034	3	30473
A_75_P01106091		3	31079	-0.15	-0.09	-0.92	-0.26			A_75_P01106091	3	31079
A_75_P01106181		3	32012	-0.45	-0.58	0.33	0.4			A_75_P01106181	3	32012
A_75_P01106209		3	32290	-0.16	-0.18	-0.26	0.02			A_75_P01106209	3	32290
A_75_P01106283		3	33069	0.09	0.18	0.1	-0.19			A_75_P01106283	3	33069
A_75_P01106401		3	34211	-0.36	0.11	0.24				A_75_P01106401	3	34211
A_75_P01106486		3	35074	0.02	-0.06	-0.62	-0.25			A_75_P01106486	3	35074
A_75_P01106570		3	35887	-0.22	-0.23	-0.12	-0.16			A_75_P01106570	3	35887
A_75_P01106643		3	36621	-0.24	-0.12	0.11	-0.05			A_75_P01106643	3	36621
A_75_P01106718		3	37398	0	0.01	-0.08	-0.17			A_75_P01106718	3	37398
A_75_P01106826		3	38503	0.54	0.52	-0.08	-0.46			A_75_P01106826	3	38503
A_75_P01106896		3	39213	0.01	-0.21	-0.73	-0.08			A_75_P01106896	3	39213
A_75_P01106967		3	39932	0.21	0.13	-1.3	-0.35			A_75_P01106967	3	39932
A_75_P01107055		3	40855	-0.7	-0.95	-0.75	0.1			A_75_P01107055	3	40855
A_75_P01107114		3	41451	-0.24	-0.25	-0.63	-0.08			A_75_P01107114	3	41451
A_75_P01107180		3	42128	-0.43	-0.31	0.19	0.2			A_75_P01107180	3	42128
A_75_P01107199		3	42323	-0.12	-0.33	0.49	0.21			A_75_P01107199	3	42323
A_75_P01107288		3	43182	-0.05	-0.04	0.15	0.32			A_75_P01107288	3	43182
A_75_P01107369		3	44000	-0.1	-0.18	-1.05	-1.54			A_75_P01107369	3	44000
A_75_P01107474		3	44997	0.05	-0.15	0.03	-0.03			A_75_P01107474	3	44997
A_75_P01107577		3	45992	-0.2	-0.28	0.18	0.25			A_75_P01107577	3	45992
A_75_P01107662		3	46845	-0.1	-0.25	-0.77	-0.47			A_75_P01107662	3	46845
A_75_P01107732		3	47540	-0.19	-0.23	0.11	0.39			A_75_P01107732	3	47540
A_75_P01107795		3	48155	0.5	0.39	0.26	-0.11			A_75_P01107795	3	48155
A_75_P01107859		3	48792	-0.16	-0.31	0.01	-0.07			A_75_P01107859	3	48792
A_75_P01107928		3	49523	-0.02	0.1	-0.88	0.08			A_75_P01107928	3	49523
A_75_P01107990		3	50205	0.42	0.3	0.65	0.42			A_75_P01107990	3	50205
A_75_P01108079		3	51111	-0.32	-0.16	-0.75	-0.21			A_75_P01108079	3	51111
A_75_P01108161		3	51975	0.06	0.01	-1.14	-0.78			A_75_P01108161	3	51975
A_75_P01108196		3	52334	0.25	0.25	0.3	0.28			A_75_P01108196	3	52334
A_75_P01108243		3	52814	-0.12	-0.22	-0.41	-0.29			A_75_P01108243	3	52814
A_75_P01108328		3	53720	0.14	0.12	0	0.03			A_75_P01108328	3	53720
A_75_P01108405		3	54512	-0.41	-0.43	-0.89	-0.18			A_75_P01108405	3	54512
A_75_P01108466		3	55163	0.21	0.06	0.09	-0.07			A_75_P01108466	3	55163
A_75_P01108539		3	55895	0.11	0.18	0.27	-0.2			A_75_P01108539	3	55895
A_75_P01108607		3	56575	-0.11	-0.21	-0.15	0.33			A_75_P01108607	3	56575
A_75_P01108686		3	57326	0.09	0.1	0.38	0.37			A_75_P01108686	3	57326
A_75_P01108775		3	58230	0.39	0.37	0.32	0.31			A_75_P01108775	3	58230
A_75_P01108841		3	58915	-0.19	-0.3	0.44	0.07			A_75_P01108841	3	58915
A_75_P01108910		3	59689	0.11	0.11	-2.07	-1.46			A_75_P01108910	3	59689
A_75_P01108982		3	60418	0.17	0.21	-0.02	0.56			A_75_P01108982	3	60418
A_75_P01109091		3	61567	0.18	0.21	-0.4	0.31			A_75_P01109091	3	61567
A_75_P01109109		3	61750	-0.05	0	-0.21	-0.3			A_75_P01109109	3	61750
A_75_P01109170		3	62421	0.38	0.43	0.36	-0.04			A_75_P01109170	3	62421
A_75_P01109250		3	63248	0.2	0.3	0.24	0.01			A_75_P01109250	3	63248
A_75_P01109317		3	63956	0.42	0.3	0.07	-0.05			A_75_P01109317	3	63956
A_75_P01109420		3	64924	0.15	0.12	-0.61	-0.28			A_75_P01109420	3	64924
A_75_P01109504		3	65769	-0.25	-0.08	0.21	0.35			A_75_P01109504	3	65769
A_75_P01109588		3	66615	0.22	0.24	0.07	0.02			A_75_P01109588	3	66615
A_75_P01109656		3	67323	0.37	0.44	-0.13	-0.17			A_75_P01109656	3	67323
A_75_P01109744		3	68259	0.21	-0.07	0.08	0.17			A_75_P01109744	3	68259
A_75_P01109808		3	68948	0.37	0.22	0.11	0.47			A_75_P01109808	3	68948
A_75_P01109878		3	69687	-0.4	-0.01	0.41	0.41			A_75_P01109878	3	69687
A_75_P01109947		3	70418	0	-0.08	-0.99	-0.74			A_75_P01109947	3	70418
A_75_P01110016		3	71144	-0.02	-0.07	-1	-0.28			A_75_P01110016	3	71144
A_75_P01110043		3	71433	0.14	0.04	-0.79	-0.63			A_75_P01110043	3	71433
A_75_P01110105		3	72030	-0.06	0.13	0.27	0.26			A_75_P01110105	3	72030
A_75_P01110189		3	72902	0.03	-0.06	-0.66	-0.03			A_75_P01110189	3	72902
A_75_P01110290		3	73935	-0.18	-0.09	0.15	-0.01			A_75_P01110290	3	73935
A_75_P01110405		3	75142	-0.07	-0.01	0.29	0.02			A_75_P01110405	3	75142
A_75_P01110463		3	75758	-0.16	-0.3	0.24	0.3			A_75_P01110463	3	75758
A_75_P01110547		3	76615	0.36	0.23	-0.65	-0.91			A_75_P01110547	3	76615
A_75_P01110619		3	77337	0.13	0.2	-0.04				A_75_P01110619	3	77337
A_75_P01110696		3	78129	0.2	0.24	-0.39	0.02			A_75_P01110696	3	78129
A_75_P01110744		3	78652	-0.19	-0.25	-0.52	-0.14			A_75_P01110744	3	78652
A_75_P01110809		3	79361	0	0.28	0.37	0.12			A_75_P01110809	3	79361
A_75_P01110893		3	80218	0.01	-0.07	-0.94	-0.35			A_75_P01110893	3	80218
A_75_P01110974		3	80977	0.27	0.21	-0.15	0.21			A_75_P01110974	3	80977
A_75_P01110997		3	81214	0.37	0.28	-0.76	-0.22			A_75_P01110997	3	81214
A_75_P01111044		3	81721	0.27	0.23	-0.04	0			A_75_P01111044	3	81721
A_75_P01111141		3	82646	-0.02	-0.09	0.21	0.32			A_75_P01111141	3	82646
A_75_P01111231		3	83515	-0.23	-0.24	0.24	-0.12			A_75_P01111231	3	83515
A_75_P01111306		3	84263	0.71	0.59	0.44	0.25			A_75_P01111306	3	84263
A_75_P01111937		3	90734	0.43	0.29	0.62	0.27			A_75_P01111937	3	90734
A_75_P01112020		3	91614	0.4	0.35	-0.6	-0.9			A_75_P01112020	3	91614
A_75_P01112112		3	92609	-0.04	-0.06	-0.62	-1.19			A_75_P01112112	3	92609
A_75_P01112181		3	93305	0.09	0.2	-0.02	0.24			A_75_P01112181	3	93305
A_75_P01112272		3	94234	0.21	0.29	0.35	0.46			A_75_P01112272	3	94234
A_75_P01112374		3	95241	0.36	0.28	-0.4	-0.11			A_75_P01112374	3	95241
A_75_P01112470		3	96134	0.24	0.16	-0.8	-0.04			A_75_P01112470	3	96134
A_75_P01112545		3	96924	-0.1	-0.16	-0.32	0.19			A_75_P01112545	3	96924
A_75_P01112567		3	97133	-0.39	-0.36	0.28	0.21			A_75_P01112567	3	97133
A_75_P01112642		3	97849	0.15	0.36	0.2	0.24			A_75_P01112642	3	97849
A_75_P01112734		3	98821	-0.06	-0.08	-0.45	-0.15			A_75_P01112734	3	98821
A_75_P01112801		3	99574	0.06	0.1	-0.45	-0.05			A_75_P01112801	3	99574
A_75_P01112853		3	100139	0.27	0.15	-0.14	-0.06			A_75_P01112853	3	100139
A_75_P01112918		3	100810	0.28	0.2	-0.16	0.16			A_75_P01112918	3	100810
A_75_P01112994		3	101620	-0.11	0.13	0.11	0.27			A_75_P01112994	3	101620
A_75_P01113077		3	102488	0.18	0.29	0.21	-0.01			A_75_P01113077	3	102488
A_75_P01113169		3	103361	-0.05	0.07	-0.1	-0.1			A_75_P01113169	3	103361
A_75_P01113216		3	103865	0.32	0.23	-0.51	-0.63			A_75_P01113216	3	103865
A_75_P01113309		3	104848	0.25	0.16	0	0.16			A_75_P01113309	3	104848
A_75_P01113379		3	105615	-0.19	-0.12	-0.58	0.02			A_75_P01113379	3	105615
A_75_P01113457		3	106518	-0.01	0.04	0.24	0.01			A_75_P01113457	3	106518
A_75_P01113479		3	106724	0.04	0.15	-0.39	-0.05			A_75_P01113479	3	106724
A_75_P01113522		3	107177	0.3	0.21	-0.9	-0.92			A_75_P01113522	3	107177
A_75_P01113624		3	108187	0.32	0.22	-0.57	-0.46			A_75_P01113624	3	108187
A_75_P01113697		3	108925	-0.14	-0.23	-1.05	-0.52			A_75_P01113697	3	108925
A_75_P01113804		3	109988	-0.08	0.03	0.36	0.34			A_75_P01113804	3	109988
A_75_P01113880		3	110763	0.12	0.3	0.4	-0.01			A_75_P01113880	3	110763
A_75_P01113955		3	111492	-0.87	0.4	0.65	0.25			A_75_P01113955	3	111492
A_75_P01114033		3	112264	0.43	0.38	0.17	-0.07			A_75_P01114033	3	112264
A_75_P01114106		3	112969	-0.35	-0.33	0.29	0.05			A_75_P01114106	3	112969
A_75_P01114172		3	113652	-0.42	-0.32	-0.41	0.04			A_75_P01114172	3	113652
A_75_P01114244		3	114378	-0.47	-0.29	-0.7	-0.21			A_75_P01114244	3	114378
A_75_P01114316		3	115089	-0.37	-0.39		-1.37			A_75_P01114316	3	115089
A_75_P01114382		3	115758	-0.19	-0.17	0.07	0.08			A_75_P01114382	3	115758
A_75_P01114413		3	116072	-0.08	-0.1	0.17	0.21			A_75_P01114413	3	116072
A_75_P01114490		3	116815	0.18	0.1	0.06	-0.03			A_75_P01114490	3	116815
A_75_P01114546		3	117391	0.25	0.17	-0.03	0.31			A_75_P01114546	3	117391
A_75_P01114623		3	118244	-0.31	-0.1	0.48	0.32			A_75_P01114623	3	118244
A_75_P01114717		3	119153	-0.01	0.03	-0.5	-0.6			A_75_P01114717	3	119153
A_75_P01114786		3	119851	-0.13	0.12	-0.12	-0.28			A_75_P01114786	3	119851
A_75_P01114843		3	120442	-0.15	-0.3	-0.05	0.01			A_75_P01114843	3	120442
A_75_P01114910		3	121095	0.17	-0.05	0.47	0.06			A_75_P01114910	3	121095
A_75_P01115013		3	122159	0.07	0.01	0.38	0.24			A_75_P01115013	3	122159
A_75_P01115158		3	123705	-0.2	0	-0.02	-0.14			A_75_P01115158	3	123705
A_75_P01115259		3	124738	0.07	0.12	-0.16	0.27			A_75_P01115259	3	124738
A_75_P01115349		3	125685	-0.24	-0.08	0.31	0			A_75_P01115349	3	125685
A_75_P01115398		3	126201	-0.08	-0.15	-0.18	-0.2			A_75_P01115398	3	126201
A_75_P01115459		3	126756	-0.08	-0.14	-0.48	0			A_75_P01115459	3	126756
A_75_P01115519		3	127381	-0.19	-0.2	-0.72	0.09			A_75_P01115519	3	127381
A_75_P01115580		3	127991	0.02	-0.04	-0.76	-0.66			A_75_P01115580	3	127991
A_75_P01115705		3	129186	-0.25	0.04	0.29	0.31			A_75_P01115705	3	129186
A_75_P01115780		3	129861	0.16	0.09	0	-0.29			A_75_P01115780	3	129861
A_75_P01115850		3	130591	-0.48	-0.52		-0.96			A_75_P01115850	3	130591
A_75_P01115938		3	131443	0.18	0.21	-1.58	-0.83			A_75_P01115938	3	131443
A_75_P01115999		3	132071	-0.02	-0.12	-0.72	0			A_75_P01115999	3	132071
A_75_P01116081		3	132942	0.06	0.06	0.07	-0.04			A_75_P01116081	3	132942
A_75_P01116177		3	133917	-0.18	-0.26	-0.19	-0.23			A_75_P01116177	3	133917
A_75_P01116257		3	134730	-0.16	-0.03	-0.42	-0.18			A_75_P01116257	3	134730
A_75_P01116330		3	135447	-0.18	-0.14	-1.62	-0.19			A_75_P01116330	3	135447
A_75_P01116348		3	135630	0.37	0.23	0.17	-0.13			A_75_P01116348	3	135630
A_75_P01116400		3	136178	-0.22	0.4	0.27	-0.19			A_75_P01116400	3	136178
A_75_P01116483		3	136963	0.08	-0.08	0.29	0.12			A_75_P01116483	3	136963
A_75_P01116582		3	137957	0.08	0.12	0.56	0.42			A_75_P01116582	3	137957
A_75_P01116653		3	138683	-0.06	-0.14	0.28	0.02			A_75_P01116653	3	138683
A_75_P01116726		3	139416	0.08	-0.07	0.21	0.18			A_75_P01116726	3	139416
A_75_P01116814		3	140293	0.32	0.2	-0.38	-0.1			A_75_P01116814	3	140293
A_75_P01116888		3	141007	-0.25	-0.14	-0.61	-1.09			A_75_P01116888	3	141007
A_75_P01116963		3	141759	-0.06	-0.12	-1.55	-1.05			A_75_P01116963	3	141759
A_75_P01117045		3	142584	-0.29	-0.18	-1.09	0.26			A_75_P01117045	3	142584
A_75_P01117131		3	143416	-0.22	-0.02	-0.87	-0.01			A_75_P01117131	3	143416
A_75_P01117200		3	144122	-0.11	-0.07	-0.46	0.3			A_75_P01117200	3	144122
A_75_P01117287		3	145005	0.12	0.15	0.29	-0.03			A_75_P01117287	3	145005
A_75_P01117326		3	145410	0.07	0.24	0.37				A_75_P01117326	3	145410
A_75_P01117398		3	146164	0.06	-0.02	0.01	0.23			A_75_P01117398	3	146164
A_75_P01117477		3	146928	-0.39	-0.45	0.07	0.27			A_75_P01117477	3	146928
A_75_P01117565		3	147834	-0.08	-0.11	-0.27	-0.18			A_75_P01117565	3	147834
A_75_P01117624		3	148437	0.18	0.21	-0.82	-0.12			A_75_P01117624	3	148437
A_75_P01117712		3	149296			-2.31	-1.7			A_75_P01117712	3	149296
A_75_P01117798		3	150149			-1.54	-2.12			A_75_P01117798	3	150149
A_75_P01117873		3	150927				-1.89			A_75_P01117873	3	150927
A_75_P01117974		3	151975	-0.21	-0.13	1.87	1.93			A_75_P01117974	3	151975
A_75_P01118051		3	152726	-0.06	0	1.6	2.12			A_75_P01118051	3	152726
A_75_P01118123		3	153447	0.1	0	0.28	1.58			A_75_P01118123	3	153447
A_75_P01118200		3	154253	-0.06	-0.04	-0.49	0.41			A_75_P01118200	3	154253
A_75_P01118270		3	154981	-0.11	0.08	1.27	1.4			A_75_P01118270	3	154981
A_75_P01118293		3	155203	-0.56	-0.5	1.5	1.83			A_75_P01118293	3	155203
A_75_P01118340		3	155689	-0.57	-0.27	1.67	1.69			A_75_P01118340	3	155689
A_75_P01118413		3	156421	0.28	0.19	1.62	1.96			A_75_P01118413	3	156421
A_75_P01118476		3	157049	-0.23	-0.23		-0.91			A_75_P01118476	3	157049
A_75_P01118553		3	157799	0.2	0.18	1.04	1.25			A_75_P01118553	3	157799
A_75_P01118627		3	158518	-0.39	-0.31	1.34	1.32			A_75_P01118627	3	158518
A_75_P01118713		3	159393	-0.19	-0.14	1.44	1.7			A_75_P01118713	3	159393
A_75_P01118790		3	160179	0.17	0.11	1.59	1.3			A_75_P01118790	3	160179
A_75_P01118854		3	160856	0.32	0.22	1.04	1.52			A_75_P01118854	3	160856
A_75_P01118940		3	161748	-0.19	-0.17	1.52	1.61			A_75_P01118940	3	161748
A_75_P01119030		3	162624	-0.13	-0.07	2.27	1.98			A_75_P01119030	3	162624
A_75_P01119115		3	163425	0.24	0.27	1.33	2.04			A_75_P01119115	3	163425
A_75_P01119238		3	164722	0.41	0.31	1.57	1.54			A_75_P01119238	3	164722
A_75_P01119265		3	164984	0.09	0.15	1.32	1.64			A_75_P01119265	3	164984
A_75_P01119321		3	165572	-0.15	-0.26	1.72	1.81			A_75_P01119321	3	165572
A_75_P01119390		3	166299	-0.11	-0.17	-0.81	-0.28			A_75_P01119390	3	166299
A_75_P01119503		3	167446	0.16	0.27	1.76	1.48			A_75_P01119503	3	167446
A_75_P01119580		3	168195	0.04	0.03	-1.03	0.61			A_75_P01119580	3	168195
A_75_P01119654		3	168899	0.67	0.82	0.15	0.32			A_75_P01119654	3	168899
A_75_P01119754		3	169881	0.36	0.27	-0.11	-0.18			A_75_P01119754	3	169881
A_75_P01119820		3	170552	-0.36	-0.63	0.45	-0.28			A_75_P01119820	3	170552
A_75_P01119907		3	171396	0.06	-0.05	-0.27	0.21			A_75_P01119907	3	171396
A_75_P01119981		3	172136	0.01	0.03	0.09	0.37			A_75_P01119981	3	172136
A_75_P01120070		3	173007	-0.16	-0.06	-0.59	-0.01			A_75_P01120070	3	173007
A_75_P01120137		3	173691	0.03	-0.07	0.33	-0.17			A_75_P01120137	3	173691
A_75_P01120245		3	174790	0.35	0.3	0.18	0.11			A_75_P01120245	3	174790
A_75_P01120264		3	174994	0.13	0.32	0.56	-0.15			A_75_P01120264	3	174994
A_75_P01120332		3	175642	0	-0.09	-0.61	-1.38			A_75_P01120332	3	175642
A_75_P01120411		3	176424	-0.02	-0.13	-0.07	-0.13			A_75_P01120411	3	176424
A_75_P01120500		3	177284	-0.42	-0.29	0.59	0.57			A_75_P01120500	3	177284
A_75_P01120570		3	178005	-0.34	-0.39	-0.29	0.22			A_75_P01120570	3	178005
A_75_P01120660		3	178907	-0.19	-0.08	-0.91	0.05			A_75_P01120660	3	178907
A_75_P01120746		3	179713	0.1	0.01	0.32	0.46			A_75_P01120746	3	179713
A_75_P01120829		3	180601	-0.22	-0.28	-0.33	-0.59			A_75_P01120829	3	180601
A_75_P01120932		3	181586	-0.41	-0.35	0.24	0.37			A_75_P01120932	3	181586
A_75_P01121020		3	182478	-0.21	-0.21	-0.29	0.2			A_75_P01121020	3	182478
A_75_P01121120		3	183445	0.05	-0.04	-0.07	0.07			A_75_P01121120	3	183445
A_75_P01121218		3	184430	0.28	0.3	-0.66	-0.51			A_75_P01121218	3	184430
A_75_P01121284		3	185128	0.26	0.21	-0.88	-0.87			A_75_P01121284	3	185128
A_75_P01121307		3	185354	-0.02	-0.01	0.1	-0.41			A_75_P01121307	3	185354
A_75_P01121347		3	185761	0.02	0.13	-0.3	-0.08			A_75_P01121347	3	185761
A_75_P01121414		3	186411	0.1	0.2	-0.43	-0.15			A_75_P01121414	3	186411
A_75_P01121481		3	187102	0.1	0.12	-0.19	0.15			A_75_P01121481	3	187102
A_75_P01121570		3	187956	0.29	0.31	-0.28	-0.6			A_75_P01121570	3	187956
A_75_P01121657		3	188834	0.04	0.16	0.39	-0.18			A_75_P01121657	3	188834
A_75_P01121768		3	189876	-0.06	-0.06	-1.07	-0.87			A_75_P01121768	3	189876
A_75_P01121831		3	190550	0.22	0.03	0.01	-0.1			A_75_P01121831	3	190550
A_75_P01121936		3	191581	-0.31	-0.4	0.07	0.29			A_75_P01121936	3	191581
A_75_P01122022		3	192488	0.4	0.32	0.02	-0.01			A_75_P01122022	3	192488
A_75_P01122083		3	193118	-0.46	-0.42	-1.19	0.18			A_75_P01122083	3	193118
A_75_P01122184		3	194189	0.01	-0.04	-0.49	-0.22			A_75_P01122184	3	194189
A_75_P01122274		3	195075	-0.04	0.1	0.29	0.34			A_75_P01122274	3	195075
A_75_P01122326		3	195603	-0.22	-0.28	-0.18	-0.1			A_75_P01122326	3	195603
A_75_P01122378		3	196120	-0.19	-0.08	-0.66	-0.19			A_75_P01122378	3	196120
A_75_P01122463		3	197046	0.01	0.06	-0.27	-0.33			A_75_P01122463	3	197046
A_75_P01122537		3	197850	-0.27	-0.32	-0.68	0.02			A_75_P01122537	3	197850
A_75_P01122615		3	198635	0.04	0.01	0.16	0.34			A_75_P01122615	3	198635
A_75_P01122896		3	201595	-0.2	-0.32	-1.93	-1.57			A_75_P01122896	3	201595
A_75_P01122987		3	202553	-0.07	-0.26	0.08	0.28			A_75_P01122987	3	202553
A_75_P01123055		3	203297	-0.33	-0.29	-0.93	-0.91			A_75_P01123055	3	203297
A_75_P01123116		3	203920	-0.36	-0.2	0.42	0.32			A_75_P01123116	3	203920
A_75_P01123183		3	204589	0.04	0.03	-0.49	-0.34			A_75_P01123183	3	204589
A_75_P01123268		3	205413	-0.15	-0.26	-0.1	-0.15			A_75_P01123268	3	205413
A_75_P01123330		3	206006	-0.2	-0.28	0.02	0.01			A_75_P01123330	3	206006
A_75_P01123399		3	206671	-0.36	-0.4	0.01	0.2			A_75_P01123399	3	206671
A_75_P01123432		3	206992	-0.35	0.01	0.23	0.35			A_75_P01123432	3	206992
A_75_P01123488		3	207565	-0.03	-0.04	-1.53	-0.95			A_75_P01123488	3	207565
A_75_P01123579		3	208401	0.25	0.15	-0.81	-0.46			A_75_P01123579	3	208401
A_75_P01123640		3	209095	0.16	0.18	-0.68	-0.6			A_75_P01123640	3	209095
A_75_P01123722		3	209945	0.45	0.36	-0.3	-0.33			A_75_P01123722	3	209945
A_75_P01123798		3	210758	0.21	0.07	0.2	0.09			A_75_P01123798	3	210758
A_75_P01123852		3	211374	-0.1	-0.28	0.17	0.05			A_75_P01123852	3	211374
A_75_P01123948		3	212459	0.32	0.36	-0.02	-0.11			A_75_P01123948	3	212459
A_75_P01124047		3	213501	0.15	0.16	-1.04	-0.79			A_75_P01124047	3	213501
A_75_P01124114		3	214214	0.06	0.13	0.29	-0.06			A_75_P01124114	3	214214
A_75_P01124194		3	215085	-0.03	-0.03	0.07	0.1			A_75_P01124194	3	215085
A_75_P01124285		3	216025	0.14	0.05	0.29	-0.1			A_75_P01124285	3	216025
A_75_P01124456		3	217707	0.01	-0.03	0.24	0.25			A_75_P01124456	3	217707
A_75_P01124503		3	218158	-0.41	-0.23	0.56	0.23			A_75_P01124503	3	218158
A_75_P01124565		3	218738	-0.25	-0.26	-1.03	-0.54			A_75_P01124565	3	218738
A_75_P01124651		3	219570	0.02	-0.07	0.07	0.51			A_75_P01124651	3	219570
A_75_P01124719		3	220274	0.12	0.14	-0.88	-0.25			A_75_P01124719	3	220274
A_75_P01124823		3	221332	-0.18	-0.06	-0.3	0.04			A_75_P01124823	3	221332
A_75_P01124926		3	222452	-0.1	0.18	0.07	-0.02			A_75_P01124926	3	222452
A_75_P01125016		3	223367	-0.47	-0.56		-0.97			A_75_P01125016	3	223367
A_75_P01125104		3	224298	0.05	-0.06	0.07	0.02			A_75_P01125104	3	224298
A_75_P01125172		3	225021	-0.06	-0.08	0.42	0.16			A_75_P01125172	3	225021
A_75_P01125246		3	225789	0.16	0.1	-0.53	-0.3			A_75_P01125246	3	225789
A_75_P01125342		3	226789	0.15	0.11	-0.09	-0.43			A_75_P01125342	3	226789
A_75_P01125418		3	227616	0.05	0.13	-0.19	0.06			A_75_P01125418	3	227616
A_75_P01125441		3	227846	-0.16	-0.22	-0.53	-0.22			A_75_P01125441	3	227846
A_75_P01125480		3	228219	-0.02	-0.03	-0.02	-0.16			A_75_P01125480	3	228219
A_75_P01125555		3	228977	-0.14	-0.27	0.42	0.04			A_75_P01125555	3	228977
A_75_P01125616		3	229626	-0.03	0.18	-0.09	0.02			A_75_P01125616	3	229626
A_75_P01125720		3	230689	0.39	0.39	0	-0.19			A_75_P01125720	3	230689
A_75_P01125777		3	231315	0.3	0.23	0.01	0.05			A_75_P01125777	3	231315
A_75_P01125859		3	232151	-0.13	-0.22	-1.05	-1.18			A_75_P01125859	3	232151
A_75_P01125972		3	233253	-0.27	-0.22	0.39	-0.16			A_75_P01125972	3	233253
A_75_P01126043		3	233983	0.04	0.15	0.17	0.5			A_75_P01126043	3	233983
A_75_P01126103		3	234625	0.19	0.29	0.29	0.28			A_75_P01126103	3	234625
A_75_P01126202		3	235603	-0.02	-0.03	-0.16	0.21			A_75_P01126202	3	235603
A_75_P01126267		3	236277	0.06	0.14	-0.59	-0.92			A_75_P01126267	3	236277
A_75_P01126345		3	237052	-0.34	-0.36	-0.82	-1.01			A_75_P01126345	3	237052
A_75_P01126367		3	237271	0.17	0.22	-0.52	-0.85			A_75_P01126367	3	237271
A_75_P01126449		3	238095	0.4	0.28	-0.2	-0.24			A_75_P01126449	3	238095
A_75_P01126510		3	238747	-0.06	0.03	0.22	0.13			A_75_P01126510	3	238747
A_75_P01126597		3	239622	-0.03	0.06	0.08	0.13			A_75_P01126597	3	239622
A_75_P01126669		3	240337	-0.02	0.14	0.22	0.33			A_75_P01126669	3	240337
A_75_P01126786		3	241549	-0.09	-0.07	-0.07	0.02			A_75_P01126786	3	241549
A_75_P01126851		3	242205	-0.22	-0.43	-0.81	-0.86			A_75_P01126851	3	242205
A_75_P01126942		3	243156	0	-0.01	-0.98	-0.28			A_75_P01126942	3	243156
A_75_P01127025		3	244003	-0.42	-0.16	-0.17	0.1			A_75_P01127025	3	244003
A_75_P01127094		3	244715	-0.21	-0.09	0.34	0.08			A_75_P01127094	3	244715
A_75_P01127180		3	245611	-0.2	-0.17	-0.87	-0.64			A_75_P01127180	3	245611
A_75_P01127259		3	246447	0.36	0.31	-0.54	-0.46			A_75_P01127259	3	246447
A_75_P01127344		3	247342	-0.21	-0.18	-0.03	0			A_75_P01127344	3	247342
A_75_P01127376		3	247663	0.07	0.28	0.32	0.31			A_75_P01127376	3	247663
A_75_P01127421		3	248137	-0.15	-0.12	0.12	0.48			A_75_P01127421	3	248137
A_75_P01127481		3	248728	0.06	0.1	-0.78	-0.29			A_75_P01127481	3	248728
A_75_P01127550		3	249421	-0.18	-0.1	0.01	0.09			A_75_P01127550	3	249421
A_75_P01127602		3	249998	0.13	0.15	-1.28	-0.67			A_75_P01127602	3	249998
A_75_P01127678		3	250707	-0.21	-0.25	-0.62	-0.18			A_75_P01127678	3	250707
A_75_P01127776		3	251738	-0.23	0.06	0.43	0.06			A_75_P01127776	3	251738
A_75_P01127851		3	252460	0.09	-0.02	-0.33	0.25			A_75_P01127851	3	252460
A_75_P01127922		3	253214	-0.39	-0.11	0.05	-0.04			A_75_P01127922	3	253214
A_75_P01127975		3	253765	0.2	0.25	0.13	0.15			A_75_P01127975	3	253765
A_75_P01128048		3	254558	0.15	0.16	-0.71	-0.68			A_75_P01128048	3	254558
A_75_P01128140		3	255503	-0.15	-0.14	0.15	0.29			A_75_P01128140	3	255503
A_75_P01128223		3	256311	-0.09	-0.17	-0.4	0.28			A_75_P01128223	3	256311
A_75_P01128242		3	256503	-0.13	-0.29	0.5	0.09			A_75_P01128242	3	256503
A_75_P01128275		3	256830	0.03	-0.07	-0.42	-0.05			A_75_P01128275	3	256830
A_75_P01128351		3	257590	0.29	0.45	-0.21	-0.7			A_75_P01128351	3	257590
A_75_P01128450		3	258557	0	-0.01	0.12	0.49			A_75_P01128450	3	258557
A_75_P01128514		3	259222	-0.04	-0.11	0.16	0.51			A_75_P01128514	3	259222
A_75_P01128584		3	259898	0.05	-0.12	0.48	0.23			A_75_P01128584	3	259898
A_75_P01128658		3	260668	-0.11	-0.09	-0.03	-0.03			A_75_P01128658	3	260668
A_75_P01128732		3	261406	0.06	0.1	-0.18	0.02			A_75_P01128732	3	261406
A_75_P01128822		3	262308	-0.04	-0.01	0.19	0.57			A_75_P01128822	3	262308
A_75_P01128895		3	262989	0.19	0.24	0.7	0.27			A_75_P01128895	3	262989
A_75_P01128972		3	263818	0.02	0.16	0.3	0.03			A_75_P01128972	3	263818
A_75_P01129052		3	264708	-0.04	-0.06	-0.07	0.07			A_75_P01129052	3	264708
A_75_P01129115		3	265361	0.13	0.08	0.04	-0.14			A_75_P01129115	3	265361
A_75_P01129135		3	265610	-0.04	-0.04	-0.31	-0.3			A_75_P01129135	3	265610
A_75_P01129189		3	266172	0.04	0.06	-0.26	0.29			A_75_P01129189	3	266172
A_75_P01129259		3	266880	0.29	0.3	-1.24	-0.07			A_75_P01129259	3	266880
A_75_P01129359		3	267828	0.32	0.14	0.43	0.18			A_75_P01129359	3	267828
A_75_P01129461		3	268875	0.32	0.24	-0.22	-0.06			A_75_P01129461	3	268875
A_75_P01129554		3	269854	0.2	0.31	0.38	0.28			A_75_P01129554	3	269854
A_75_P01129653		3	270847	0.31	0.2	-0.47	-0.31			A_75_P01129653	3	270847
A_75_P01129718		3	271527	0.12	0.22	-0.12	0.45			A_75_P01129718	3	271527
A_75_P01129786		3	272188	0.06	0	-0.51	-0.13			A_75_P01129786	3	272188
A_75_P01129863		3	273028	-0.65	-0.43	0.52	0.21			A_75_P01129863	3	273028
A_75_P01129940		3	273753	0.28	0.2	-0.18	-0.18			A_75_P01129940	3	273753
A_75_P01130000		3	274330	0	0.02	-1.01	-0.46			A_75_P01130000	3	274330
A_75_P01130062		3	274964	-0.08	-0.09	-0.4	-0.4			A_75_P01130062	3	274964
A_75_P01130076		3	275135	0.01	-0.04	0.2	0.08			A_75_P01130076	3	275135
A_75_P01130114		3	275526	0.37	0.18	-1.22	-1.26			A_75_P01130114	3	275526
A_75_P01130196		3	276336	-0.37	-0.16	0.36	0.28			A_75_P01130196	3	276336
A_75_P01130300		3	277366	0.4	0.39	-0.38	0.03			A_75_P01130300	3	277366
A_75_P01130378		3	278134	-0.18	0.01	0.59	0.78			A_75_P01130378	3	278134
A_75_P01130454		3	278895	-0.15	-0.15	-0.31	-0.63			A_75_P01130454	3	278895
A_75_P01130559		3	279889	-0.33	-0.24	-0.51	-0.15			A_75_P01130559	3	279889
A_75_P01130622		3	280506	-0.29	-0.23	0.07	-0.13			A_75_P01130622	3	280506
A_75_P01130713		3	281408	-0.28	-0.32	-1.94	-0.63			A_75_P01130713	3	281408
A_75_P01130800		3	282223	0.19	0.24	-0.13	-0.07			A_75_P01130800	3	282223
A_75_P01130883		3	283059	-0.06	-0.13	-0.07	-0.03			A_75_P01130883	3	283059
A_75_P01130963		3	283802	0.11	0.04	0.21	0.02			A_75_P01130963	3	283802
A_75_P01131053		3	284737	-0.48	-0.3	0.51	0.32			A_75_P01131053	3	284737
A_75_P01131077		3	284949	-0.23	-0.29	-1.07	-0.62			A_75_P01131077	3	284949
A_75_P01131109		3	285271	0.12	0.4	0.21	0.32			A_75_P01131109	3	285271
A_75_P01131188		3	286057	-0.11	-0.15	0.1	0.52			A_75_P01131188	3	286057
A_75_P01131254		3	286732	-0.06	-0.17		-0.88			A_75_P01131254	3	286732
A_75_P01131351		3	287696	-0.9	-0.12	0.57	0.15			A_75_P01131351	3	287696
A_75_P01131434		3	288557	0.29	0.22	0.33	0.45			A_75_P01131434	3	288557
A_75_P01131528		3	289495	-0.09	-0.15	-0.08	-0.07			A_75_P01131528	3	289495
A_75_P01131618		3	290420	0.37	0.21	0.49	0.24			A_75_P01131618	3	290420
A_75_P01131694		3	291221	-0.04	-0.15	-0.01	0.1			A_75_P01131694	3	291221
A_75_P01131796		3	292244	0.11	0.09	-1.35	0.19			A_75_P01131796	3	292244
A_75_P01131870		3	292992	-0.22	-0.27	-1.08	0.12			A_75_P01131870	3	292992
A_75_P01131981		3	294177	-0.07	-0.17	-0.22	-0.28			A_75_P01131981	3	294177
A_75_P01132071		3	295089	-0.16	-0.02	0.55	0.69			A_75_P01132071	3	295089
A_75_P01132104		3	295391	0.03	0.09	0.29	0.66			A_75_P01132104	3	295391
A_75_P01132154		3	295892	-0.13	-0.16	0.01	0.2			A_75_P01132154	3	295892
A_75_P01132265		3	297000	0.06	-0.02	-0.07	0.35			A_75_P01132265	3	297000
A_75_P01132335		3	297649	0.29	0.23	-0.44	-0.43			A_75_P01132335	3	297649
A_75_P01132407		3	298383	0.1	0.16	1	0.81			A_75_P01132407	3	298383
A_75_P01132465		3	298988	0.26	0.17	-0.34	0.05			A_75_P01132465	3	298988
A_75_P01132528		3	299637	-0.12	-0.26	-0.09	0.23			A_75_P01132528	3	299637
A_75_P01132626		3	300659	-0.02	0.29	0.77	0.68			A_75_P01132626	3	300659
A_75_P01132686		3	301317	0.24	0.23	0.28	0.2			A_75_P01132686	3	301317
A_75_P01132753		3	302030	-0.08	-0.04	0.07	0.06			A_75_P01132753	3	302030
A_75_P01132839		3	302842	-0.11	-0.12	-0.44	0.39			A_75_P01132839	3	302842
A_75_P01132945		3	303900	0.18	0.18	-0.39	-0.09			A_75_P01132945	3	303900
A_75_P01133031		3	304795	0.07	0.1	-0.2	0.43			A_75_P01133031	3	304795
A_75_P01133171		3	306266	-0.03	-0.11	0.13	-0.12			A_75_P01133171	3	306266
A_75_P01133251		3	307066	0.23	0.24	0.09	0.07			A_75_P01133251	3	307066
A_75_P01133497		3	309480	-0.01	-0.01	-1.5	-1.32			A_75_P01133497	3	309480
A_75_P01133601		3	310548	-0.06	-0.12	0.29	0.17			A_75_P01133601	3	310548
A_75_P01133745		3	311951	0.39	0.37	0.21	-0.1			A_75_P01133745	3	311951
A_75_P01133819		3	312708	0.03	-0.01	-0.57	-0.43			A_75_P01133819	3	312708
A_75_P01133879		3	313322	-0.06	-0.18	0.24	0.14			A_75_P01133879	3	313322
A_75_P01133934		3	313934	0.02	0.04	0.13	0.12			A_75_P01133934	3	313934
A_75_P01134023		3	314866	-0.04	-0.01	0.19	0.15			A_75_P01134023	3	314866
A_75_P01134403		4	2228	-0.19	-0.18	-0.39	-0.18			A_75_P01134403	4	2228
A_75_P01135939		4	17868	0.19	0.12	0.26	0.46			A_75_P01135939	4	17868
A_75_P01136059		4	19088	0.08	0.02	-0.26	-0.06			A_75_P01136059	4	19088
A_75_P01136087		4	19376	-0.16	0.02	0.48	0.21			A_75_P01136087	4	19376
A_75_P01136128		4	19782	-0.16	-0.07	0.1	-0.06			A_75_P01136128	4	19782
A_75_P01136218		4	20674	0.01	-0.26	0.35	0.1			A_75_P01136218	4	20674
A_75_P01136290		4	21444	-0.02	-0.03	0.36	0.17			A_75_P01136290	4	21444
A_75_P01136389		4	22446	-0.1	-0.18	-1.44	-1.08			A_75_P01136389	4	22446
A_75_P01136474		4	23309	-0.21	-0.2	0.62	0.04			A_75_P01136474	4	23309
A_75_P01136525		4	23847	-0.4	-0.45	0.56	0.36			A_75_P01136525	4	23847
A_75_P01136593		4	24502	0	-0.12	-0.14	-0.09			A_75_P01136593	4	24502
A_75_P01136680		4	25328	-0.36	-0.26	0.42	-0.24			A_75_P01136680	4	25328
A_75_P01136777		4	26391	-0.35	-0.4	0.14	0.79			A_75_P01136777	4	26391
A_75_P01136871		4	27343	-0.61	-0.72	-1.44	0.13			A_75_P01136871	4	27343
A_75_P01136967		4	28291	-0.16	-0.09	-0.49	-0.01			A_75_P01136967	4	28291
A_75_P01137042		4	29035	0.12	0.06	0.02	-0.03			A_75_P01137042	4	29035
A_75_P01137069		4	29307	-0.09	-0.19	0.22	0.21			A_75_P01137069	4	29307
A_75_P01137120		4	29840	-0.04	0.24	-0.36	-0.22			A_75_P01137120	4	29840
A_75_P01137189		4	30518	-0.15	-0.31	-0.24	0			A_75_P01137189	4	30518
A_75_P01137293		4	31590	0.07	0.02	0.36	0.24			A_75_P01137293	4	31590
A_75_P01137386		4	32521	-0.27	-0.33	-0.24	-0.16			A_75_P01137386	4	32521
A_75_P01137478		4	33464	-0.07	-0.13	-0.36	-0.34			A_75_P01137478	4	33464
A_75_P01137558		4	34245	0.12	0.18	0.04	0.02			A_75_P01137558	4	34245
A_75_P01137620		4	34817	-0.27	-0.39	-0.28	0.23			A_75_P01137620	4	34817
A_75_P01137724		4	35889	0.09	-0.06	0.08	0.34			A_75_P01137724	4	35889
A_75_P01137798		4	36640	0.41	0.4	-0.59	-1.08			A_75_P01137798	4	36640
A_75_P01137864		4	37290	0.01	0.07	-0.04	0.17			A_75_P01137864	4	37290
A_75_P01137954		4	38190	0.07	0.06	0.39	0.46			A_75_P01137954	4	38190
A_75_P01138023		4	38857	0.02	-0.01	0.16	0.3			A_75_P01138023	4	38857
A_75_P01138046		4	39086	-0.21	-0.16	-0.85	-1.36			A_75_P01138046	4	39086
A_75_P01138087		4	39489	-0.22	0.03	0.54	0.06			A_75_P01138087	4	39489
A_75_P01138142		4	40056	-0.07	0.09	-0.08	0.45			A_75_P01138142	4	40056
A_75_P01138217		4	40831	-0.03	-0.11	0.52	0.34			A_75_P01138217	4	40831
A_75_P01138308		4	41836	0.07	0.04	-0.76	0.12			A_75_P01138308	4	41836
A_75_P01138382		4	42644	0.11	0.08	0.29	0.27			A_75_P01138382	4	42644
A_75_P01138438		4	43245	0.02	0.02	0.41	-0.12			A_75_P01138438	4	43245
A_75_P01138524		4	44172	0.28	0.32	-0.79	-0.07			A_75_P01138524	4	44172
A_75_P01138703		4	46033	-0.43	-0.54	-1.34	-0.68			A_75_P01138703	4	46033
A_75_P01138800		4	47059	0.28	0.34	0.55	0.45			A_75_P01138800	4	47059
A_75_P01138861		4	47684	0.23	0.29	0.44	0.7			A_75_P01138861	4	47684
A_75_P01138940		4	48477	-0.18	-0.35	0.35	0.08			A_75_P01138940	4	48477
A_75_P01139017		4	49208	-0.14	-0.21	0.32	0			A_75_P01139017	4	49208
A_75_P01139042		4	49454	0.19	0.16	0.03	0.07			A_75_P01139042	4	49454
A_75_P01139091		4	49957	-0.39	-0.51	-0.69	0.05			A_75_P01139091	4	49957
A_75_P01139174		4	50789	-0.05	-0.07	-0.14	0.06			A_75_P01139174	4	50789
A_75_P01139236		4	51430	-0.16	-0.2	-0.1	-0.33			A_75_P01139236	4	51430
A_75_P01139290		4	51953	-0.39	-0.38	-0.45	-0.09			A_75_P01139290	4	51953
A_75_P01139364		4	52691	0.04	-0.03	-0.89	0.06			A_75_P01139364	4	52691
A_75_P01139446		4	53510	0.06	-0.07	0.31	0.39			A_75_P01139446	4	53510
A_75_P01139536		4	54400	-0.26	0.01	0.04	0.13			A_75_P01139536	4	54400
A_75_P01139633		4	55376	-0.12	-0.19	-1.38	-0.14			A_75_P01139633	4	55376
A_75_P01139712		4	56109	-0.02	-0.04	-0.81	-0.09			A_75_P01139712	4	56109
A_75_P01139817		4	57126	-0.22	-0.24	-0.05	0.05			A_75_P01139817	4	57126
A_75_P01139903		4	58046	0.05	0.13	-0.12	0.01			A_75_P01139903	4	58046
A_75_P01139977		4	58776	0.23	0.15	-1.7	-0.74			A_75_P01139977	4	58776
A_75_P01140009		4	59102	0.12	0.09	-0.6	-0.31			A_75_P01140009	4	59102
A_75_P01140069		4	59725	0.06	0.09	0.16	0.43			A_75_P01140069	4	59725
A_75_P01140165		4	60743	-0.24	-0.26	-0.42	-0.05			A_75_P01140165	4	60743
A_75_P01140240		4	61501	0.04	0.1	0.21	0.04			A_75_P01140240	4	61501
A_75_P01140302		4	62121	0.17	0.2	-0.75	-1.21			A_75_P01140302	4	62121
A_75_P01140391		4	63000	0.03	-0.09	0.33	0.28			A_75_P01140391	4	63000
A_75_P01140474		4	63860	-0.24	0	0.21	0.19			A_75_P01140474	4	63860
A_75_P01140542		4	64519	0.03	0.13	-1.01	0.12			A_75_P01140542	4	64519
A_75_P01140620		4	65259	0.35	0.35	-0.28	-0.17			A_75_P01140620	4	65259
A_75_P01140703		4	66102	-0.11	-0.17	-0.46	-0.12			A_75_P01140703	4	66102
A_75_P01140786		4	66952	-0.16	-0.24	0.39	0.19			A_75_P01140786	4	66952
A_75_P01140864		4	67799	-0.31	-0.31	-0.93	-0.49			A_75_P01140864	4	67799
A_75_P01140947		4	68628	0.28	0.32	-0.35	-0.22			A_75_P01140947	4	68628
A_75_P01140963		4	68801	-0.26	-0.14	0.35	-0.04			A_75_P01140963	4	68801
A_75_P01141010		4	69275	-0.19	0.04	0.42	0.39			A_75_P01141010	4	69275
A_75_P01141102		4	70214	0.24	0.03	0.03	0.27			A_75_P01141102	4	70214
A_75_P01141179		4	70988	0.02	0.08	-0.02	0.25			A_75_P01141179	4	70988
A_75_P01141252		4	71714	-0.09	-0.18	-0.53	-0.87			A_75_P01141252	4	71714
A_75_P01141321		4	72407	-0.1	-0.14	0.41	0.57			A_75_P01141321	4	72407
A_75_P01141426		4	73482	-0.11	-0.08	-0.81	-0.8			A_75_P01141426	4	73482
A_75_P01141512		4	74354	-0.08	0	0.39	-0.1			A_75_P01141512	4	74354
A_75_P01141590		4	75152	0.12	-0.08	-0.22	-0.16			A_75_P01141590	4	75152
A_75_P01141659		4	75861	0.26	0.04	0.21	0.04			A_75_P01141659	4	75861
A_75_P01141761		4	76890	0.2	0.22	0	-0.06			A_75_P01141761	4	76890
A_75_P01141841		4	77712	-0.05	0.35	0.12	-0.22			A_75_P01141841	4	77712
A_75_P01141914		4	78415	-0.03	0.11	0.54	0.4			A_75_P01141914	4	78415
A_75_P01141961		4	78887	0.03	0.07	-0.39	-0.27			A_75_P01141961	4	78887
A_75_P01142021		4	79453	0.05	0.1	0.13	-0.02			A_75_P01142021	4	79453
A_75_P01142085		4	80100	-0.07	0	-0.79	-0.51			A_75_P01142085	4	80100
A_75_P01142188		4	81140	-0.16	-0.01	-0.14				A_75_P01142188	4	81140
A_75_P01142281		4	82095	-0.11	0.04	0.26	0			A_75_P01142281	4	82095
A_75_P01142373		4	83001	-0.08	0.03	0.37	-0.06			A_75_P01142373	4	83001
A_75_P01142456		4	83803	0.32	0.3	-0.52	-0.17			A_75_P01142456	4	83803
A_75_P01142544		4	84675	0.17	0.03	-0.86	-0.67			A_75_P01142544	4	84675
A_75_P01142609		4	85353	0.38	0.28	0.4	0.09			A_75_P01142609	4	85353
A_75_P01142697		4	86239	0.26	0.19	-0.81	-0.83			A_75_P01142697	4	86239
A_75_P01142760		4	86853	0.2	-0.07	-0.85	-0.77			A_75_P01142760	4	86853
A_75_P01142861		4	87860	-0.11	-0.08	-0.98	0			A_75_P01142861	4	87860
A_75_P01142933		4	88614	-0.18	-0.32	0.35	0.23			A_75_P01142933	4	88614
A_75_P01142965		4	88921	0.09	0.07	0	0.45			A_75_P01142965	4	88921
A_75_P01143021		4	89516	0.27	0.01	-0.53	-0.96			A_75_P01143021	4	89516
A_75_P01143104		4	90330	0.09	0.1		-1.87			A_75_P01143104	4	90330
A_75_P01143185		4	91139	0.27	0.2	-0.04	-0.09			A_75_P01143185	4	91139
A_75_P01143264		4	91955	0	0.23	0.47	0.36			A_75_P01143264	4	91955
A_75_P01143331		4	92592	-0.45	-0.5	-0.17	-0.03			A_75_P01143331	4	92592
A_75_P01143438		4	93676	0.37	0.18	0.27	-0.16			A_75_P01143438	4	93676
A_75_P01143551		4	94780	0.41	0.36	0.13	0.2			A_75_P01143551	4	94780
A_75_P01143635		4	95606	0.1	-0.1	0.47	0.42			A_75_P01143635	4	95606
A_75_P01143715		4	96423	0.09	-0.03	-0.05	-0.23			A_75_P01143715	4	96423
A_75_P01143786		4	97135	-0.16	0.03	0.24	-0.23			A_75_P01143786	4	97135
A_75_P01143867		4	97949	-0.54	-0.05	0.09	0.17			A_75_P01143867	4	97949
A_75_P01143925		4	98526	0.04	0.18	0.65	-0.11			A_75_P01143925	4	98526
A_75_P01143944		4	98696	-0.22	-0.19	0.05	0.09			A_75_P01143944	4	98696
A_75_P01143987		4	99147	-0.24	-0.17	-0.14	-0.2			A_75_P01143987	4	99147
A_75_P01144050		4	99790	-0.33	-0.46	0.23	-0.03			A_75_P01144050	4	99790
A_75_P01144128		4	100558	0.21	0.16	-0.71				A_75_P01144128	4	100558
A_75_P01144211		4	101397	-0.44	-0.22	0.64	-0.08			A_75_P01144211	4	101397
A_75_P01144372		4	102999	0.12	0.15	-0.44	-0.22			A_75_P01144372	4	102999
A_75_P01144476		4	104068	0.26	0.06	-0.72	-0.82			A_75_P01144476	4	104068
A_75_P01144539		4	104698	0.42	0.44	0.21	0.39			A_75_P01144539	4	104698
A_75_P01144604		4	105421	0.03	0.17	-0.47	-0.55			A_75_P01144604	4	105421
A_75_P01144678		4	106188	0.26	0.26	0.07	0.06			A_75_P01144678	4	106188
A_75_P01144747		4	106852	0.42	0.32	-0.02	-0.32			A_75_P01144747	4	106852
A_75_P01144851		4	107944	0.01	0.07	0.08	0.09			A_75_P01144851	4	107944
A_75_P01144869		4	108178	-0.36	-0.29	0.16	0.46			A_75_P01144869	4	108178
A_75_P01144905		4	108527	-0.2	-0.18	-0.38	0.06			A_75_P01144905	4	108527
A_75_P01144998		4	109538	0.2	0.24	0	-0.14			A_75_P01144998	4	109538
A_75_P01145045		4	110040	0.08	0.07	-0.15	-0.45			A_75_P01145045	4	110040
A_75_P01145118		4	110834	-0.01	0.14	-0.43	-0.32			A_75_P01145118	4	110834
A_75_P01145208		4	111795	0.17	0.1	-0.6	-1.1			A_75_P01145208	4	111795
A_75_P01145272		4	112437	-0.37	-0.24	-0.42	-0.12			A_75_P01145272	4	112437
A_75_P01145337		4	113080	0.24	0.4	-0.5	0.01			A_75_P01145337	4	113080
A_75_P01145419		4	113920	0.28	0.27	-0.64	0.09			A_75_P01145419	4	113920
A_75_P01145474		4	114461	-0.44	-0.35	-0.4	-0.12			A_75_P01145474	4	114461
A_75_P01145536		4	115072	0.01	-0.06	0.37	-0.03			A_75_P01145536	4	115072
A_75_P01145628		4	115976	-0.19	-0.15	-0.09	-0.31			A_75_P01145628	4	115976
A_75_P01145713		4	116807	0.1	0.07	-0.28	0.32			A_75_P01145713	4	116807
A_75_P01145739		4	117095	0.24	0.19	-1.59	-0.58			A_75_P01145739	4	117095
A_75_P01145789		4	117592	-0.05	-0.13	-0.28	0.17			A_75_P01145789	4	117592
A_75_P01145875		4	118524	0.15	0.16	-0.94	0.3			A_75_P01145875	4	118524
A_75_P01145981		4	119537	-0.02	-0.03	-0.23	-0.23			A_75_P01145981	4	119537
A_75_P01146072		4	120449	0.05	0.18	0.17	0.01			A_75_P01146072	4	120449
A_75_P01146162		4	121303	0	-0.07	-0.38	0.33			A_75_P01146162	4	121303
A_75_P01146248		4	122167	0.22	0.04	-0.4	-0.65			A_75_P01146248	4	122167
A_75_P01146327		4	122902	0.32	0.52	0.66	-0.12			A_75_P01146327	4	122902
A_75_P01146413		4	123800	-0.5	-0.45		-1.46			A_75_P01146413	4	123800
A_75_P01146528		4	124976	-0.06	-0.13	0.26	0.1			A_75_P01146528	4	124976
A_75_P01146607		4	125741	-0.34	-0.31	-0.36	-0.36			A_75_P01146607	4	125741
A_75_P01146659		4	126274	0.21	0.19	0.19	0.06			A_75_P01146659	4	126274
A_75_P01146789		4	127574	0.13	0.04	-0.61	-0.19			A_75_P01146789	4	127574
A_75_P01146820		4	127906	0.36	0.32	0.38	0.32			A_75_P01146820	4	127906
A_75_P01146883		4	128563	-0.09	-0.13	0.33	0.16			A_75_P01146883	4	128563
A_75_P01146953		4	129310	-0.26	-0.16	0.24	0.12			A_75_P01146953	4	129310
A_75_P01147034		4	130104	-0.16	-0.27	-0.16	0.15			A_75_P01147034	4	130104
A_75_P01147092		4	130727	-0.07	-0.04	-0.06				A_75_P01147092	4	130727
A_75_P01147170		4	131512	0.21	0.21	0.06	0.11			A_75_P01147170	4	131512
A_75_P01147230		4	132108	-0.09	-0.14	-0.25	-0.45			A_75_P01147230	4	132108
A_75_P01147296		4	132742	-0.11	-0.09	-0.9	-0.45			A_75_P01147296	4	132742
A_75_P01147394		4	133690	0.21	0.2	-0.89	-0.79			A_75_P01147394	4	133690
A_75_P01147533		4	135137	0.21	0.12	-0.57	-0.04			A_75_P01147533	4	135137
A_75_P01147593		4	135765	-0.05	-0.09	0	-0.33			A_75_P01147593	4	135765
A_75_P01147669		4	136556	0.19	0.13	0.23	0.06			A_75_P01147669	4	136556
A_75_P01147758		4	137471	0.13	0.18	0.35	0.45			A_75_P01147758	4	137471
A_75_P01147781		4	137708	-0.1	-0.25	-0.41	-0.82			A_75_P01147781	4	137708
A_75_P01147837		4	138287	0.12	0.11	-0.11	0.33			A_75_P01147837	4	138287
A_75_P01147910		4	139019	-0.24	-0.19	0.1	0.21			A_75_P01147910	4	139019
A_75_P01147962		4	139615	-0.15	-0.16	-1.07	-0.85			A_75_P01147962	4	139615
A_75_P01148021		4	140229	-0.5	-0.45	0.44	-0.16			A_75_P01148021	4	140229
A_75_P01148124		4	141295	0.18	0.08	0.16	0.35			A_75_P01148124	4	141295
A_75_P01148212		4	142153	-0.12	-0.2	-0.2	-0.25			A_75_P01148212	4	142153
A_75_P01148289		4	142946	-0.32	-0.3	0.04	-0.41			A_75_P01148289	4	142946
A_75_P01148380		4	143849	-0.13	-0.23	0.08	-0.09			A_75_P01148380	4	143849
A_75_P01148448		4	144572	0.44	0.52	0.15	0.1			A_75_P01148448	4	144572
A_75_P01148540		4	145534	0.39	0.43	-0.22	-0.11			A_75_P01148540	4	145534
A_75_P01148602		4	146127	0.43	0.43	0.22	-0.01			A_75_P01148602	4	146127
A_75_P01148725		4	147375	0.09	0.09	-1.05	-0.87			A_75_P01148725	4	147375
A_75_P01148749		4	147611	0.06	0.1	0.18	-0.08			A_75_P01148749	4	147611
A_75_P01148829		4	148457	0.23	0.21	0.63	0.16			A_75_P01148829	4	148457
A_75_P01148923		4	149493	0.09	-0.05	-0.1	-0.24			A_75_P01148923	4	149493
A_75_P01149025		4	150536	-0.16	-0.08	-0.17	-0.08			A_75_P01149025	4	150536
A_75_P01149089		4	151163	0.04	-0.2	0.26	0.11			A_75_P01149089	4	151163
A_75_P01149150		4	151802	0.15	0.08		-1.1			A_75_P01149150	4	151802
A_75_P01149229		4	152589	0.22	0.12	0.09	-0.04			A_75_P01149229	4	152589
A_75_P01149329		4	153660	0	0.1	-0.97	-1.16			A_75_P01149329	4	153660
A_75_P01149412		4	154509	0.2	0.23	-0.43	-0.19			A_75_P01149412	4	154509
A_75_P01149524		4	155570	-0.07	0	0.3	0.03			A_75_P01149524	4	155570
A_75_P01149576		4	156125	-0.12	-0.15	-0.25	0.18			A_75_P01149576	4	156125
A_75_P01149664		4	156964	0.15	0.07	-0.32	0.48			A_75_P01149664	4	156964
A_75_P01149758		4	157872	0.29	0.34	0.07	0.04			A_75_P01149758	4	157872
A_75_P01149804		4	158353	0.16	0.22	0.4	0.12			A_75_P01149804	4	158353
A_75_P01149840		4	158694	-0.01	-0.15	-0.5	-0.09			A_75_P01149840	4	158694
A_75_P01149895		4	159284	0.09	0.1	-0.24	-0.15			A_75_P01149895	4	159284
A_75_P01149955		4	159284	-0.14	-0.08	-0.04	0.14			SFA1probe-1	4	159349
A_75_P01150045		4	160818	-0.61	-0.29	0.06	0.26			SFA1probe-2	4	159413
A_75_P01150137		4	161703	0.14	0.14	-0.57	-0.15			SFA1probe-3	4	159477
A_75_P01150230		4	162650	0	-0.02	0.25	0.07			SFA1probe-4	4	159541
A_75_P01150324		4	163670	0.25	0.2		-0.84			SFA1probe-5	4	159605
A_75_P01150419		4	164603	-0.48	-0.18	0.39	0.23			SFA1probe-6	4	159669
A_75_P01150512		4	165538	0.07	0.09	0.09	0.07			SFA1probe-7	4	159733
A_75_P01150575		4	166181	0.28	0.2	-0.61	-0.09			SFA1probe-8	4	159797
A_75_P01150636		4	166769	-0.23	-0.2	0.18	0.07			SFA1probe-9	4	159861
A_75_P01150714		4	167572	0.22	0.21	-1.02	-0.07			A_75_P01149955	4	159913
A_75_P01150744		4	167845	-0.06	-0.21	0.44	0.43			SFA1probe-10	4	159925
A_75_P01150795		4	168379	-0.08	0.57	0.49	0.14			SFA1probe-11	4	159989
A_75_P01150899		4	169363	-0.08	-0.14	-0.17	0.37			SFA1probe-12	4	160053
A_75_P01150965		4	170049	-0.11	-0.13	-0.5	-0.75			SFA1probe-13	4	160117
A_75_P01151049		4	170913	0.04	0.02	-0.87	-0.59			SFA1probe-14	4	160181
A_75_P01151137		4	171788	0.2	0.24	0.01	-0.33			SFA1probe-15	4	160245
A_75_P01151278		4	173136	-0.21	-0.1	0.41	0.06			SFA1probe-16	4	160309
A_75_P01151345		4	173752	-0.11	-0.29	0.35	-0.16			SFA1probe-17	4	160373
A_75_P01151404		4	174363	-0.53	-0.27	0.36	0.44			SFA1probe-18	4	160437
A_75_P01151488		4	175151	-0.1	-0.12	0.1	0.17			SFA1probe-19	4	160501
A_75_P01151551		4	175794	0	0.11	0.32	0.45			SFA1probe-20	4	160565
A_75_P01151613		4	176438	-0.09	-0.04	0.07	0			SFA1probe-21	4	160629
A_75_P01151710		4	177457	-0.27	-0.28	-0.91	-0.06			SFA1probe-22	4	160693
A_75_P01151735		4	177694	0.18	0.15	-0.11	-0.21			SFA1probe-23	4	160757
A_75_P01151819		4	178593	-0.29	-0.26	-0.32	0.06			A_75_P01150045	4	160818
A_75_P01151886		4	179250	-0.21	0.06	0.39	0.27			A_75_P01150137	4	161703
A_75_P01151936		4	179775	0.2	0.04	-0.47	0.08			A_75_P01150230	4	162650
A_75_P01152014		4	180539	-0.1	-0.2	-0.38	-0.02			A_75_P01150324	4	163670
A_75_P01152114		4	181500	0.27	0.33	-0.59	-0.54			A_75_P01150419	4	164603
A_75_P01152181		4	182206	-0.15	-0.21	-0.05	0.02			A_75_P01150512	4	165538
A_75_P01152232		4	182702	0.12	0.08	-0.87	-0.88			A_75_P01150575	4	166181
A_75_P01152308		4	183480	-0.07	-0.15	0.06	-0.45			A_75_P01150636	4	166769
A_75_P01152408		4	184436	-0.25	-0.38	0.13	0.07			A_75_P01150714	4	167572
A_75_P01152488		4	185255	-0.44	-0.17	0.41	0			A_75_P01150744	4	167845
A_75_P01152562		4	185930	0.14	0.05	-0.65	-0.69			A_75_P01150795	4	168379
A_75_P01152642		4	186714	-0.33	-0.33	-0.63	-0.56			A_75_P01150899	4	169363
A_75_P01152675		4	187026	-0.21	-0.24	0	0.29			A_75_P01150965	4	170049
A_75_P01152724		4	187484	-0.03	-0.07	0.05	0.12			A_75_P01151049	4	170913
A_75_P01152802		4	188264	0.1	0.21	0.18	0.17			A_75_P01151137	4	171788
A_75_P01152903		4	189287	0.04	0.04	-0.64	-0.07			A_75_P01151278	4	173136
A_75_P01152972		4	190006	-0.02	0.01	0.37	0.06			A_75_P01151345	4	173752
A_75_P01153058		4	190883	-0.21	-0.28	-0.39	-0.23			A_75_P01151404	4	174363
A_75_P01153137		4	191696	0.1	0.27	0.22	-0.08			A_75_P01151488	4	175151
A_75_P01153203		4	192381	0.06	-0.05	0.03	-0.13			A_75_P01151551	4	175794
A_75_P01153335		4	193751	-0.26	0.05	0.31	0.08			A_75_P01151613	4	176438
A_75_P01153413		4	194501	-0.45	-0.24	0.3	-0.1			A_75_P01151710	4	177457
A_75_P01153471		4	195080	0.04	0.03		-1.28			A_75_P01151735	4	177694
A_75_P01153529		4	195681	-0.25	-0.25	-0.47	-0.51			A_75_P01151819	4	178593
A_75_P01153552		4	195910	-0.21	-0.23	-0.7	-0.94			A_75_P01151886	4	179250
A_75_P01153595		4	196360	-0.02	-0.03	0.45	0.18			A_75_P01151936	4	179775
A_75_P01153689		4	197268	0.14	0.08	-0.25	-0.13			A_75_P01152014	4	180539
A_75_P01153749		4	197870	0.18	0.18	0.07	0.42			A_75_P01152114	4	181500
A_75_P01153833		4	198717	-0.33	-0.02	0.19	0.08			A_75_P01152181	4	182206
A_75_P01153905		4	199460	0.29	0.3	0.16	-0.24			A_75_P01152232	4	182702
A_75_P01154005		4	200517	-0.19	-0.27	0.21	0			A_75_P01152308	4	183480
A_75_P01154074		4	201176	-0.05	-0.02	-0.11	-0.01			A_75_P01152408	4	184436
A_75_P01154183		4	202269	-0.07	-0.04	-0.08	0.32			A_75_P01152488	4	185255
A_75_P01154269		4	203135	0	-0.14	-1.22	-0.99			A_75_P01152562	4	185930
A_75_P01154373		4	204240	-0.09	-0.08	-0.67	-0.27			A_75_P01152642	4	186714
A_75_P01154466		4	205183	-0.16	-0.18	-1.01	-0.4			A_75_P01152675	4	187026
A_75_P01154562		4	206177	0.34	0.33	0.09	-0.19			A_75_P01152724	4	187484
A_75_P01154579		4	206356	-0.21	-0.28	0.22	0.17			A_75_P01152802	4	188264
A_75_P01154649		4	207106	-0.19	-0.03	0.27	0.05			A_75_P01152903	4	189287
A_75_P01154742		4	208009	-0.1	-0.13	0.04	-0.27			A_75_P01152972	4	190006
A_75_P01154835		4	208949	-0.35	-0.49	0.13	0.27			A_75_P01153058	4	190883
A_75_P01154909		4	209696	0.01	0.26	-0.22	-0.02			A_75_P01153137	4	191696
A_75_P01154991		4	210534	-1.18	0.26	0.35	0.15			A_75_P01153203	4	192381
A_75_P01155096		4	211629	0.22	0.16	0.48	0.12			A_75_P01153335	4	193751
A_75_P01155170		4	212363	0.04	0.12	-0.64	-0.17			A_75_P01153413	4	194501
A_75_P01155256		4	213259	0.11	0.07	-0.29	-0.42			A_75_P01153471	4	195080
A_75_P01155339		4	214126	0.24	0.27	0.5	0.02			A_75_P01153529	4	195681
A_75_P01155438		4	215085	0.17	0.03	0.19	0.42			A_75_P01153552	4	195910
A_75_P01155511		4	215788	0.14	0.09	0.27	0			A_75_P01153595	4	196360
A_75_P01155582		4	216499	-0.07	-0.09	-0.97	-0.9			A_75_P01153689	4	197268
A_75_P01155615		4	216841	0.16	0.1	0.3	0.52			A_75_P01153749	4	197870
A_75_P01155655		4	217251	-0.26	-0.09	0.3	0.06			A_75_P01153833	4	198717
A_75_P01155715		4	217854	0.21	0.12	-0.48	0.02			A_75_P01153905	4	199460
A_75_P01155837		4	219052	0.29	0.29	0.08	0.02			A_75_P01154005	4	200517
A_75_P01155906		4	219740	0.24	0.28	0.52	0.31			A_75_P01154074	4	201176
A_75_P01155999		4	220670	0.17	0.27	-0.49	-1.25			A_75_P01154183	4	202269
A_75_P01156076		4	221468	0.1	-0.02	0.18	0.28			A_75_P01154269	4	203135
A_75_P01156136		4	222087	-0.27	-0.28	0.46	0.19			A_75_P01154373	4	204240
A_75_P01156222		4	222944	0.29	0.19	0.09	-0.28			A_75_P01154466	4	205183
A_75_P01156311		4	223819	-0.06	0.06	0.27	0			A_75_P01154562	4	206177
A_75_P01156371		4	224406	-0.09	0.1	0.48	0.13			A_75_P01154579	4	206356
A_75_P01156447		4	225229	-0.04	-0.15	-0.3	-0.01			A_75_P01154649	4	207106
A_75_P01156502		4	225762	-0.2	-0.05	0.44	-0.21			A_75_P01154742	4	208009
A_75_P01156528		4	226032	-0.51	-0.58	-0.07	0.21			A_75_P01154835	4	208949
A_75_P01156562		4	226366	0.04	0.02	-0.64	-0.06			A_75_P01154909	4	209696
A_75_P01156639		4	227152	0.19	0.27	0.63	0.09			A_75_P01154991	4	210534
A_75_P01156771		4	228460	-0.04	-0.14	-0.08	0.38			A_75_P01155096	4	211629
A_75_P01156845		4	229204	0.09	0	-0.34	-0.8			A_75_P01155170	4	212363
A_75_P01156902		4	229767	0.33	0.15	0.01	0.11			A_75_P01155256	4	213259
A_75_P01157004		4	230821	-0.09	-0.18	0.19	-0.14			A_75_P01155339	4	214126
A_75_P01157068		4	231471	-0.03	-0.15	0.11	-0.1			A_75_P01155438	4	215085
A_75_P01157152		4	232319	0.09	0.06	0.39	0.33			A_75_P01155511	4	215788
A_75_P01157244		4	233252	0.5	0.43	0.01	-0.01			A_75_P01155582	4	216499
A_75_P01157325		4	234063	-0.63	-0.45	-0.23	-0.29			A_75_P01155615	4	216841
A_75_P01157452		4	235371	0.02	-0.01	-0.71	-0.16			A_75_P01155655	4	217251
A_75_P01157553		4	236283	0.05	0.13	-0.92	-0.5			A_75_P01155715	4	217854
A_75_P01157589		4	236613	0.22	0.16	-0.68	-0.98			A_75_P01155837	4	219052
A_75_P01157623		4	236945	0.29	0.19	-0.88	-0.42			A_75_P01155906	4	219740
A_75_P01157696		4	237658	0.11	0.09	0.24	0.28			A_75_P01155999	4	220670
A_75_P01157770		4	238404	0.32	0.22	0.24	-0.04			A_75_P01156076	4	221468
A_75_P01157847		4	239167	0.01	0	0.12	0.14			A_75_P01156136	4	222087
A_75_P01157912		4	239810	0.24	0.17	-1.05	-1.06			A_75_P01156222	4	222944
A_75_P01157981		4	240500	0.06	-0.17	-1.13	-0.39			A_75_P01156311	4	223819
A_75_P01158038		4	241126	-0.26	-0.29	-0.23	-0.43			A_75_P01156371	4	224406
A_75_P01158106		4	241823	-0.01	-0.14	-0.15	-0.24			A_75_P01156447	4	225229
A_75_P01158190		4	242704	-0.19	-0.16	-0.47	-0.45			A_75_P01156502	4	225762
A_75_P01158268		4	243498	0.18	0.12	-0.48	-0.8			A_75_P01156528	4	226032
A_75_P01158383		4	244596	0.05	0.04	0.29	0.22			A_75_P01156562	4	226366
A_75_P01158465		4	245398	-0.39	-0.21	0.28	0.26			A_75_P01156639	4	227152
A_75_P01158482		4	245559	0.22	0.41	0.1	0.06			A_75_P01156771	4	228460
A_75_P01158539		4	246133	-0.07	-0.01	0.32	0.31			A_75_P01156845	4	229204
A_75_P01158631		4	247073	-0.42	-0.39	0.09	0.15			A_75_P01156902	4	229767
A_75_P01158684		4	247652	0.2	0.21	-0.31	-0.5			A_75_P01157004	4	230821
A_75_P01158768		4	248467	-0.15	-0.23	0.24	0.03			A_75_P01157068	4	231471
A_75_P01158852		4	249311	-0.04	-0.15	-1.16	-0.04			A_75_P01157152	4	232319
A_75_P01158919		4	250013	-0.22	-0.14	0.07	-0.21			A_75_P01157244	4	233252
A_75_P01159042		4	251261	-0.41	-0.21	0.47	0.23			A_75_P01157325	4	234063
A_75_P01159121		4	252024	-0.22	-0.17	0.29	-0.12			A_75_P01157452	4	235371
A_75_P01159198		4	252778	0.04	0.07	-1.07	-1.04			A_75_P01157553	4	236283
A_75_P01159324		4	254060	0.02	-0.09	-0.8	0.08			A_75_P01157589	4	236613
A_75_P01159434		4	255114	-0.28	-0.09	0.29	-0.19			A_75_P01157623	4	236945
A_75_P01159559		4	256382	-0.11	0.18	0.06	0.03			A_75_P01157696	4	237658
A_75_P01159584		4	256612	-0.19	-0.21		0.17			A_75_P01157770	4	238404
A_75_P01159630		4	257074	0.01	0.05		-0.35			A_75_P01157847	4	239167
A_75_P01159737		4	258159	-0.15	0.16	0.1	0.12			A_75_P01157912	4	239810
A_75_P01159804		4	258834	0.01	-0.06	0.11	0.36			A_75_P01157981	4	240500
A_75_P01159885		4	259641	0.13	0.04	-0.5	0.09			A_75_P01158038	4	241126
A_75_P01159985		4	260637	-0.35	0.02	0.31	0.12			A_75_P01158106	4	241823
A_75_P01160048		4	261256	0.42	0.26	0.27	0.31			A_75_P01158190	4	242704
A_75_P01160117		4	261981	-0.12	-0.24	0.56	0.2			A_75_P01158268	4	243498
A_75_P01160194		4	262745	0.32	0.35	-0.67	-0.76			A_75_P01158383	4	244596
A_75_P01160255		4	263410	-0.14	-0.11	-0.89	-0.54			A_75_P01158465	4	245398
A_75_P01160334		4	264164	0.11	0.38	0.51	0.54			A_75_P01158482	4	245559
[truncated: 13,169 more rows]

## Sheet: 27547_CLACRegionMean
Gene/Clone ID	Gene/Clone Name	Chromosome Number	Nucleotide Position	Consensus Count	Consensus FDR	1a wt #1 vs PSL2	1a wt #2 vs PSL2
A_75_P01000003		1	48	0	1	0	0
A_75_P01000148		1	1516	0	1	0	0
A_75_P01000289		1	2997	0	1	0	0
A_75_P01000360		1	3736	0	1	0	0
A_75_P01000410		1	4229	0	1	0	0
A_75_P01000473		1	4857	0	1	0	0
A_75_P01000549		1	5626	0	1	0	0
A_75_P01000600		1	6146	0	1	0	0
A_75_P01000684		1	6973	0	1	0	0
A_75_P01000762		1	7748	0	1	0	0
A_75_P01000835		1	8471	0	1	0	0
A_75_P01000898		1	9065	0	1	0	0
A_75_P01000951		1	9582	0	1	0	0
A_75_P01000967		1	9737	0	1	0	0
A_75_P01001017		1	10241	0	1	0	0
A_75_P01001106		1	11079	0	1	0	0
A_75_P01001161		1	11599	0	1	0	0
A_75_P01001343		1	13480	0	1	0	0
A_75_P01001457		1	14632	0	1	0	0
A_75_P01001643		1	16454	0	1	0	0
A_75_P01001747		1	17518	0	1	0	0
A_75_P01001967		1	19765	0	1	0	0
A_75_P01002230		1	22516	0	1	0	0
A_75_P01002684		1	27166	0	1	0	0
A_75_P01002757		1	27935	0	1	0	0
A_75_P01002834		1	28686	0	1	0	0
A_75_P01002852		1	28855	0	1	0	0
A_75_P01002903		1	29351	0	1	0	0
A_75_P01002980		1	30166	0	1	0	0
A_75_P01003050		1	30873	0	1	0	0
A_75_P01003094		1	31327	0	1	0	0
A_75_P01003172		1	32163	0	1	0	0
A_75_P01003241		1	32929	0	1	0	0
A_75_P01003291		1	33457	0	1	0	0
A_75_P01003372		1	34340	0	1	0	0
A_75_P01003435		1	34992	0	1	0	0
A_75_P01003488		1	35595	0	1	0	0
A_75_P01003548		1	36219	1	1.10598	-0.755333	0
A_75_P01003648		1	37207	1	1.10598	-0.755333	0
A_75_P01003669		1	37408	1	1.10598	-0.755333	0
A_75_P01003714		1	37857	0	1	0	0
A_75_P01003776		1	38497	0	1	0	0
A_75_P01003833		1	39096	0	1	0	0
A_75_P01003908		1	39844	0	1	0	0
A_75_P01003958		1	40358	0	1	0	0
A_75_P01004042		1	41229	0	1	0	0
A_75_P01004134		1	42180	0	1	0	0
A_75_P01004182		1	42678	0	1	0	0
A_75_P01004232		1	43205	0	1	0	0
A_75_P01004303		1	43934	0	1	0	0
A_75_P01004374		1	44697	0	1	0	0
A_75_P01004422		1	45244	0	1	0	0
A_75_P01004446		1	45500	0	1	0	0
A_75_P01004507		1	46151	0	1	0	0
A_75_P01004559		1	46773	0	1	0	0
A_75_P01004639		1	47567	0	1	0	0
A_75_P01004694		1	48146	0	1	0	0
A_75_P01004751		1	48710	0	1	0	0
A_75_P01004826		1	49446	0	1	0	0
A_75_P01004925		1	50476	0	1	0	0
A_75_P01004994		1	51176	0	1	0	0
A_75_P01005043		1	51691	0	1	0	0
A_75_P01005106		1	52376	0	1	0	0
A_75_P01005194		1	53254	0	1	0	0
A_75_P01005256		1	53873	0	1	0	0
A_75_P01005273		1	54057	0	1	0	0
A_75_P01005307		1	54427	0	1	0	0
A_75_P01005387		1	55267	0	1	0	0
A_75_P01005482		1	56231	0	1	0	0
A_75_P01005558		1	56986	0	1	0	0
A_75_P01005623		1	57667	0	1	0	0
A_75_P01005701		1	58458	0	1	0	0
A_75_P01005779		1	59254	0	1	0	0
A_75_P01005867		1	60185	0	1	0	0
A_75_P01005908		1	60674	0	1	0	0
A_75_P01005989		1	61510	0	1	0	0
A_75_P01006058		1	62223	0	1	0	0
A_75_P01006106		1	62719	0	1	0	0
A_75_P01006136		1	62995	0	1	0	0
A_75_P01006194		1	63564	0	1	0	0
A_75_P01006253		1	64205	0	1	0	0
A_75_P01006312		1	64813	0	1	0	0
A_75_P01006370		1	65447	0	1	0	0
A_75_P01006455		1	66305	0	1	0	0
A_75_P01006520		1	66901	0	1	0	0
A_75_P01006590		1	67605	0	1	0	0
A_75_P01006657		1	68291	0	1	0	0
A_75_P01006713		1	68863	0	1	0	0
A_75_P01006754		1	69346	0	1	0	0
A_75_P01006814		1	69987	0	1	0	0
A_75_P01006869		1	70564	0	1	0	0
A_75_P01006887		1	70747	0	1	0	0
A_75_P01006941		1	71286	0	1	0	0
A_75_P01006992		1	71774	0	1	0	0
A_75_P01007061		1	72479	0	1	0	0
A_75_P01007136		1	73253	0	1	0	0
A_75_P01007193		1	73812	0	1	0	0
A_75_P01007246		1	74322	0	1	0	0
A_75_P01007303		1	74931	0	1	0	0
A_75_P01007380		1	75677	0	1	0	0
A_75_P01007453		1	76420	0	1	0	0
A_75_P01007517		1	77036	0	1	0	0
A_75_P01007598		1	77886	0	1	0	0
A_75_P01007681		1	78725	0	1	0	0
A_75_P01007705		1	78983	0	1	0	0
A_75_P01007739		1	79338	0	1	0	0
A_75_P01007826		1	80173	0	1	0	0
A_75_P01007896		1	80866	0	1	0	0
A_75_P01007975		1	81714	0	1	0	0
A_75_P01008053		1	82551	0	1	0	0
A_75_P01008107		1	83113	0	1	0	0
A_75_P01008163		1	83738	0	1	0	0
A_75_P01008264		1	84738	0	1	0	0
A_75_P01008324		1	85383	0	1	0	0
A_75_P01008405		1	86188	0	1	0	0
A_75_P01008487		1	87046	0	1	0	0
A_75_P01008548		1	87671	0	1	0	0
A_75_P01008580		1	87976	0	1	0	0
A_75_P01008616		1	88334	0	1	0	0
A_75_P01008737		1	89566	0	1	0	0
A_75_P01008821		1	90379	0	1	0	0
A_75_P01008902		1	91203	0	1	0	0
A_75_P01008977		1	91958	0	1	0	0
A_75_P01009040		1	92630	0	1	0	0
A_75_P01009120		1	93423	0	1	0	0
A_75_P01009207		1	94357	0	1	0	0
A_75_P01009287		1	95127	0	1	0	0
A_75_P01009385		1	96055	0	1	0	0
A_75_P01009463		1	96844	0	1	0	0
A_75_P01009497		1	97199	0	1	0	0
A_75_P01009557		1	97746	0	1	0	0
A_75_P01009643		1	98627	0	1	0	0
A_75_P01009709		1	99313	0	1	0	0
A_75_P01009766		1	99880	0	1	0	0
A_75_P01009850		1	100758	0	1	0	0
A_75_P01009938		1	101656	0	1	0	0
A_75_P01010006		1	102334	0	1	0	0
A_75_P01010101		1	103308	0	1	0	0
A_75_P01010184		1	104104	0	1	0	0
A_75_P01010278		1	105018	0	1	0	0
A_75_P01010336		1	105621	0	1	0	0
A_75_P01010404		1	106309	0	1	0	0
A_75_P01010421		1	106502	0	1	0	0
A_75_P01010487		1	107150	0	1	0	0
A_75_P01010528		1	107577	0	1	0	0
A_75_P01010577		1	108086	0	1	0	0
A_75_P01010628		1	108616	0	1	0	0
A_75_P01010695		1	109359	0	1	0	0
A_75_P01010777		1	110204	0	1	0	0
A_75_P01010837		1	110836	0	1	0	0
A_75_P01010899		1	111446	0	1	0	0
A_75_P01010953		1	112001	0	1	0	0
A_75_P01011016		1	112637	0	1	0	0
A_75_P01011086		1	113326	0	1	0	0
A_75_P01011144		1	113932	0	1	0	0
A_75_P01011170		1	114228	0	1	0	0
A_75_P01011203		1	114597	0	1	0	0
A_75_P01011255		1	115197	0	1	0	0
A_75_P01011306		1	115733	0	1	0	0
A_75_P01011384		1	116505	0	1	0	0
A_75_P01011460		1	117274	0	1	0	0
A_75_P01011539		1	117995	0	1	0	0
A_75_P01011595		1	118600	0	1	0	0
A_75_P01011666		1	119266	0	1	0	0
A_75_P01011748		1	120059	0	1	0	0
A_75_P01011809		1	120671	0	1	0	0
A_75_P01011863		1	121242	0	1	0	0
A_75_P01011938		1	121957	0	1	0	0
A_75_P01011965		1	122237	0	1	0	0
A_75_P01011999		1	122586	0	1	0	0
A_75_P01012099		1	123537	0	1	0	0
A_75_P01012160		1	124182	0	1	0	0
A_75_P01012229		1	124839	0	1	0	0
A_75_P01012314		1	125694	0	1	0	0
A_75_P01012393		1	126524	0	1	0	0
A_75_P01012490		1	127508	0	1	0	0
A_75_P01012556		1	128196	0	1	0	0
A_75_P01012606		1	128709	0	1	0	0
A_75_P01012681		1	129523	0	1	0	0
A_75_P01012739		1	130157	0	1	0	0
A_75_P01012796		1	130727	0	1	0	0
A_75_P01012813		1	130910	0	1	0	0
A_75_P01012852		1	131344	0	1	0	0
A_75_P01012926		1	132118	0	1	0	0
A_75_P01013008		1	132979	0	1	0	0
A_75_P01013066		1	133565	0	1	0	0
A_75_P01013159		1	134556	0	1	0	0
A_75_P01013246		1	135426	0	1	0	0
A_75_P01013311		1	136112	0	1	0	0
A_75_P01013363		1	136645	0	1	0	0
A_75_P01013415		1	137199	0	1	0	0
A_75_P01013483		1	137857	0	1	0	0
A_75_P01013565		1	138668	0	1	0	0
A_75_P01013621		1	139288	0	1	0	0
A_75_P01013634		1	139438	0	1	0	0
A_75_P01013705		1	140134	0	1	0	0
A_75_P01013842		1	141556	0	1	0	0
A_75_P01013926		1	142436	0	1	0	0
A_75_P01014006		1	143256	0	1	0	0
A_75_P01014070		1	143904	0	1	0	0
A_75_P01014137		1	144582	0	1	0	0
A_75_P01014209		1	145221	0	1	0	0
A_75_P01014290		1	145992	0	1	0	0
A_75_P01014379		1	146912	0	1	0	0
A_75_P01014459		1	147714	0	1	0	0
A_75_P01014512		1	148227	0	1	0	0
A_75_P01014602		1	149140	0	1	0	0
A_75_P01014623		1	149317	0	1	0	0
A_75_P01014660		1	149713	0	1	0	0
A_75_P01014722		1	150340	0	1	0	0
A_75_P01014782		1	150964	0	1	0	0
A_75_P01014837		1	151546	0	1	0	0
A_75_P01014916		1	152366	0	1	0	0
A_75_P01015021		1	153409	0	1	0	0
A_75_P01015100		1	154240	0	1	0	0
A_75_P01015170		1	154956	0	1	0	0
A_75_P01015222		1	155481	0	1	0	0
A_75_P01015299		1	156232	0	1	0	0
A_75_P01015375		1	156971	0	1	0	0
A_75_P01015460		1	157766	0	1	0	0
A_75_P01015478		1	157944	0	1	0	0
A_75_P01015514		1	158325	0	1	0	0
A_75_P01015598		1	159128	0	1	0	0
A_75_P01015685		1	160004	0	1	0	0
A_75_P01016350		1	166406	0	1	0	0
A_75_P01016402		1	166934	0	1	0	0
A_75_P01016479		1	167710	0	1	0	0
A_75_P01016543		1	168332	0	1	0	0
A_75_P01016637		1	169276	0	1	0	0
A_75_P01016722		1	170117	0	1	0	0
A_75_P01016782		1	170716	0	1	0	0
A_75_P01016858		1	171474	0	1	0	0
A_75_P01016917		1	172079	0	1	0	0
A_75_P01016945		1	172342	0	1	0	0
A_75_P01017006		1	172912	0	1	0	0
A_75_P01017077		1	173619	0	1	0	0
A_75_P01017149		1	174351	0	1	0	0
A_75_P01017220		1	175099	0	1	0	0
A_75_P01017426		1	177113	0	1	0	0
A_75_P01017491		1	177719	1	1.10598	0	-0.837
A_75_P01017567		1	178467	2	0.173737	0	-0.837
A_75_P01017638		1	179160	1	1.10598	0	0
A_75_P01017697		1	179758	1	1.10598	0	0
A_75_P01017778		1	180536	0	1	0	0
A_75_P01017829		1	181067	0	1	0	0
A_75_P01017854		1	181321	0	1	0	0
A_75_P01017893		1	181679	0	1	0	0
A_75_P01017968		1	182441	0	1	0	0
A_75_P01018077		1	183527	0	1	0	0
A_75_P01018147		1	184210	0	1	0	0
A_75_P01018250		1	185284	0	1	0	0
A_75_P01018311		1	185903	0	1	0	0
A_75_P01018388		1	186672	0	1	0	0
A_75_P01018460		1	187397	0	1	0	0
A_75_P01018544		1	188329	0	1	0	0
A_75_P01018714		1	190077	0	1	0	0
A_75_P01018781		1	190830	0	1	0	0
A_75_P01018848		1	191693	0	1	0	0
A_75_P01018861		1	191840	0	1	0	0
A_75_P01018894		1	192237	0	1	0	0
A_75_P01018950		1	192821	0	1	0	0
A_75_P01019042		1	193813	0	1	0	0
A_75_P01019112		1	194508	1	1.10598	0	-0.781889
A_75_P01019175		1	195154	1	1.10598	0	-0.781889
A_75_P01019260		1	196008	1	1.10598	0	-0.781889
A_75_P01019331		1	196754	1	1.10598	0	-0.781889
A_75_P01019383		1	197254	2	0.173737	-0.974314	-0.781889
A_75_P01019459		1	198003	3	0.00643189	-0.974314	-0.781889
A_75_P01019538		1	198759	5	1.99335e-06	-0.974314	-0.781889
A_75_P01019594		1	199310	5	1.99335e-06	-0.974314	-0.781889
A_75_P01019669		1	200086	5	1.99335e-06	-0.974314	-0.781889
A_75_P01019693		1	200353	5	1.99335e-06	-0.974314	-0.781889
A_75_P01019747		1	200883	5	1.99335e-06	-0.974314	-0.781889
A_75_P01019791		1	201375	3	0.00643189	-0.974314	-0.781889
A_75_P01019855		1	202009	3	0.00643189	-0.974314	-0.781889
A_75_P01019931		1	202726	5	1.99335e-06	-0.974314	-0.781889
A_75_P01020000		1	203405	5	1.99335e-06	-0.974314	-0.781889
A_75_P01020270		1	206273	5	1.99335e-06	-0.974314	-0.781889
A_75_P01020408		1	207629	8	2.66418e-13	-0.974314	-0.781889
A_75_P01022284		1	226845	8	2.66418e-13	-0.974314	-0.781889
A_75_P01022345		1	227433	5	1.99335e-06	-0.974314	-0.781889
A_75_P01022508		1	229146	4	0.00013404	-0.974314	-0.781889
A_75_P01022572		1	229802	4	0.00013404	-0.974314	-0.781889
A_75_P01023234		2	6566	0	1	0	0
A_75_P01023395		2	8282	0	1	0	0
A_75_P01023448		2	8802	0	1	0	0
A_75_P01023549		2	9790	0	1	0	0
A_75_P01023608		2	10392	0	1	0	0
A_75_P01023730		2	11589	0	1	0	0
A_75_P01023785		2	12113	0	1	0	0
A_75_P01023877		2	13062	0	1	0	0
A_75_P01023953		2	13820	0	1	0	0
A_75_P01024026		2	14550	0	1	0	0
A_75_P01024089		2	15211	0	1	0	0
A_75_P01024155		2	15814	0	1	0	0
A_75_P01024232		2	16596	0	1	0	0
A_75_P01024322		2	17503	0	1	0	0
A_75_P01024341		2	17687	0	1	0	0
A_75_P01024385		2	18141	0	1	0	0
A_75_P01024492		2	19208	0	1	0	0
A_75_P01024576		2	20086	0	1	0	0
A_75_P01024632		2	20628	0	1	0	0
A_75_P01024701		2	21262	0	1	0	0
A_75_P01024781		2	22018	0	1	0	0
A_75_P01024874		2	22961	0	1	0	0
A_75_P01024949		2	23774	0	1	0	0
A_75_P01025033		2	24599	0	1	0	0
A_75_P01025119		2	25416	0	1	0	0
A_75_P01025190		2	26191	0	1	0	0
A_75_P01025291		2	27223	0	1	0	0
A_75_P01025331		2	27615	0	1	0	0
A_75_P01025382		2	28099	0	1	0	0
A_75_P01025443		2	28709	0	1	0	0
A_75_P01026103		2	35567	0	1	0	0
A_75_P01026196		2	36473	0	1	0	0
A_75_P01026261		2	37164	0	1	0	0
A_75_P01026335		2	37919	0	1	0	0
A_75_P01026419		2	38763	0	1	0	0
A_75_P01026500		2	39564	0	1	0	0
A_75_P01026586		2	40420	0	1	0	0
A_75_P01026672		2	41293	0	1	0	0
A_75_P01026737		2	41984	0	1	0	0
A_75_P01026803		2	42676	0	1	0	0
A_75_P01026821		2	42860	0	1	0	0
A_75_P01026898		2	43659	0	1	0	0
A_75_P01026965		2	44309	0	1	0	0
A_75_P01027037		2	45013	0	1	0	0
A_75_P01027104		2	45655	0	1	0	0
A_75_P01027162		2	46255	0	1	0	0
A_75_P01027231		2	46973	0	1	0	0
A_75_P01027330		2	47964	0	1	0	0
A_75_P01027404		2	48779	0	1	0	0
A_75_P01027532		2	50097	0	1	0	0
A_75_P01027634		2	51080	0	1	0	0
A_75_P01027718		2	51934	0	1	0	0
A_75_P01027782		2	52585	0	1	0	0
A_75_P01027810		2	52872	0	1	0	0
A_75_P01027845		2	53255	0	1	0	0
A_75_P01027916		2	53970	0	1	0	0
A_75_P01028006		2	54946	0	1	0	0
A_75_P01028081		2	55694	0	1	0	0
A_75_P01028146		2	56357	0	1	0	0
A_75_P01028222		2	57104	0	1	0	0
A_75_P01028291		2	57794	0	1	0	0
A_75_P01028381		2	58739	0	1	0	0
A_75_P01028443		2	59341	0	1	0	0
A_75_P01028561		2	60534	0	1	0	0
A_75_P01028662		2	61515	0	1	0	0
A_75_P01028760		2	62519	0	1	0	0
A_75_P01028795		2	62860	0	1	0	0
A_75_P01028843		2	63365	0	1	0	0
A_75_P01028926		2	64213	0	1	0	0
A_75_P01029029		2	65268	0	1	0	0
A_75_P01029115		2	66116	0	1	0	0
A_75_P01029200		2	66916	0	1	0	0
A_75_P01029291		2	67871	0	1	0	0
A_75_P01029360		2	68620	0	1	0	0
A_75_P01029524		2	70229	0	1	0	0
A_75_P01029605		2	71135	0	1	0	0
A_75_P01029690		2	72007	0	1	0	0
A_75_P01029753		2	72654	0	1	0	0
A_75_P01029772		2	72840	0	1	0	0
A_75_P01029819		2	73336	0	1	0	0
A_75_P01029889		2	74085	0	1	0	0
A_75_P01029977		2	74931	0	1	0	0
A_75_P01030072		2	75843	0	1	0	0
A_75_P01030122		2	76363	0	1	0	0
A_75_P01030206		2	77203	0	1	0	0
A_75_P01030268		2	77819	0	1	0	0
A_75_P01030367		2	78816	0	1	0	0
A_75_P01030466		2	79821	0	1	0	0
A_75_P01030541		2	80586	0	1	0	0
A_75_P01030637		2	81507	0	1	0	0
A_75_P01030750		2	82650	0	1	0	0
A_75_P01030778		2	82955	0	1	0	0
A_75_P01030841		2	83518	0	1	0	0
A_75_P01030927		2	84394	0	1	0	0
A_75_P01031016		2	85366	0	1	0	0
A_75_P01031099		2	86197	0	1	0	0
A_75_P01031196		2	87154	0	1	0	0
A_75_P01031252		2	87727	0	1	0	0
A_75_P01031374		2	88963	0	1	0	0
A_75_P01031471		2	89889	0	1	0	0
A_75_P01031550		2	90724	0	1	0	0
A_75_P01031618		2	91389	0	1	0	0
A_75_P01031679		2	91985	0	1	0	0
A_75_P01031767		2	92891	0	1	0	0
A_75_P01031790		2	93134	0	1	0	0
A_75_P01031848		2	93746	0	1	0	0
A_75_P01031943		2	94636	0	1	0	0
A_75_P01032044		2	95681	0	1	0	0
A_75_P01032108		2	96289	0	1	0	0
A_75_P01032173		2	96927	0	1	0	0
A_75_P01032242		2	97635	0	1	0	0
A_75_P01032331		2	98465	0	1	0	0
A_75_P01032416		2	99276	0	1	0	0
A_75_P01032490		2	100021	0	1	0	0
A_75_P01032576		2	100910	0	1	0	0
A_75_P01032664		2	101810	0	1	0	0
A_75_P01032737		2	102522	0	1	0	0
A_75_P01032755		2	102691	0	1	0	0
A_75_P01032807		2	103259	0	1	0	0
A_75_P01032882		2	104003	0	1	0	0
A_75_P01032951		2	104701	0	1	0	0
A_75_P01033018		2	105374	0	1	0	0
A_75_P01033092		2	106133	0	1	0	0
A_75_P01033168		2	106844	0	1	0	0
A_75_P01033232		2	107452	0	1	0	0
A_75_P01033310		2	108262	0	1	0	0
A_75_P01033391		2	109092	0	1	0	0
A_75_P01033493		2	110075	0	1	0	0
A_75_P01033576		2	110856	0	1	0	0
A_75_P01033660		2	111759	0	1	0	0
A_75_P01033692		2	112062	0	1	0	0
A_75_P01033754		2	112753	0	1	0	0
A_75_P01033830		2	113532	0	1	0	0
A_75_P01033893		2	114196	0	1	0	0
A_75_P01033969		2	114957	0	1	0	0
A_75_P01034062		2	115886	0	1	0	0
A_75_P01034147		2	116755	0	1	0	0
A_75_P01034233		2	117605	0	1	0	0
A_75_P01034317		2	118407	0	1	0	0
A_75_P01034418		2	119372	0	1	0	0
A_75_P01034493		2	120115	0	1	0	0
A_75_P01034589		2	121029	0	1	0	0
A_75_P01034649		2	121703	0	1	0	0
A_75_P01034678		2	121976	0	1	0	0
A_75_P01034722		2	122395	0	1	0	0
A_75_P01034805		2	123280	0	1	0	0
A_75_P01034885		2	124056	0	1	0	0
A_75_P01034955		2	124769	0	1	0	0
A_75_P01035047		2	125689	0	1	0	0
A_75_P01035102		2	126203	0	1	0	0
A_75_P01035196		2	127195	0	1	0	0
A_75_P01035275		2	128004	0	1	0	0
A_75_P01035376		2	129021	0	1	0	0
A_75_P01035447		2	129739	0	1	0	0
A_75_P01035520		2	130461	0	1	0	0
A_75_P01035592		2	131178	0	1	0	0
A_75_P01035615		2	131397	0	1	0	0
A_75_P01035677		2	132041	0	1	0	0
A_75_P01035781		2	133103	0	1	0	0
A_75_P01035885		2	134102	0	1	0	0
A_75_P01035954		2	134780	0	1	0	0
A_75_P01036030		2	135522	0	1	0	0
A_75_P01036127		2	136448	0	1	0	0
A_75_P01036195		2	137118	0	1	0	0
A_75_P01036247		2	137673	0	1	0	0
A_75_P01036328		2	138476	0	1	0	0
A_75_P01036433		2	139522	0	1	0	0
A_75_P01036512		2	140362	0	1	0	0
A_75_P01036591		2	141128	0	1	0	0
A_75_P01036609		2	141334	0	1	0	0
A_75_P01036648		2	141734	0	1	0	0
A_75_P01036728		2	142562	0	1	0	0
A_75_P01036792		2	143179	0	1	0	0
A_75_P01036844		2	143721	0	1	0	0
A_75_P01036942		2	144651	0	1	0	0
A_75_P01037002		2	145251	0	1	0	0
A_75_P01037067		2	145926	0	1	0	0
A_75_P01037150		2	146725	0	1	0	0
A_75_P01037247		2	147725	0	1	0	0
A_75_P01037314		2	148413	0	1	0	0
A_75_P01037411		2	149372	0	1	0	0
A_75_P01037515		2	150388	0	1	0	0
A_75_P01037550		2	150754	0	1	0	0
A_75_P01037631		2	151586	0	1	0	0
A_75_P01037721		2	152465	0	1	0	0
A_75_P01037794		2	153203	0	1	0	0
A_75_P01037865		2	153948	0	1	0	0
A_75_P01037954		2	154852	0	1	0	0
A_75_P01038069		2	155982	0	1	0	0
A_75_P01038144		2	156755	0	1	0	0
A_75_P01038223		2	157530	0	1	0	0
A_75_P01038303		2	158360	0	1	0	0
A_75_P01038385		2	159276	0	1	0	0
A_75_P01038562		2	161103	0	1	0	0
A_75_P01038601		2	161475	0	1	0	0
A_75_P01038649		2	161971	0	1	0	0
A_75_P01038732		2	162803	0	1	0	0
A_75_P01038790		2	163374	0	1	0	0
A_75_P01038878		2	164306	0	1	0	0
A_75_P01038944		2	165018	0	1	0	0
A_75_P01039010		2	165711	0	1	0	0
A_75_P01039107		2	166634	0	1	0	0
A_75_P01039211		2	167737	0	1	0	0
A_75_P01039289		2	168516	0	1	0	0
A_75_P01039386		2	169508	0	1	0	0
A_75_P01039503		2	170713	0	1	0	0
A_75_P01039602		2	171730	0	1	0	0
A_75_P01039623		2	171931	0	1	0	0
A_75_P01039692		2	172661	0	1	0	0
A_75_P01039776		2	173470	0	1	0	0
A_75_P01039846		2	174193	0	1	0	0
A_75_P01039935		2	175080	0	1	0	0
A_75_P01039989		2	175595	0	1	0	0
A_75_P01040065		2	176336	0	1	0	0
A_75_P01040131		2	176967	0	1	0	0
A_75_P01040220		2	177831	0	1	0	0
A_75_P01040332		2	178901	0	1	0	0
A_75_P01040450		2	180045	0	1	0	0
A_75_P01040547		2	181046	0	1	0	0
A_75_P01040627		2	181856	0	1	0	0
A_75_P01040647		2	182066	0	1	0	0
A_75_P01040717		2	182764	0	1	0	0
A_75_P01040808		2	183716	0	1	0	0
A_75_P01040862		2	184248	0	1	0	0
A_75_P01040938		2	184992	0	1	0	0
A_75_P01041027		2	185846	0	1	0	0
A_75_P01041133		2	186893	0	1	0	0
A_75_P01041223		2	187759	0	1	0	0
A_75_P01041358		2	189103	0	1	0	0
A_75_P01041437		2	189879	0	1	0	0
A_75_P01041526		2	190790	0	1	0	0
A_75_P01041612		2	191655	0	1	0	0
A_75_P01041676		2	192272	0	1	0	0
A_75_P01041715		2	192671	0	1	0	0
A_75_P01041786		2	193426	0	1	0	0
A_75_P01041856		2	194137	0	1	0	0
A_75_P01041919		2	194838	0	1	0	0
A_75_P01041987		2	195581	0	1	0	0
A_75_P01042049		2	196189	0	1	0	0
A_75_P01042148		2	197205	0	1	0	0
A_75_P01042269		2	198438	0	1	0	0
A_75_P01042370		2	199452	0	1	0	0
A_75_P01042454		2	200322	0	1	0	0
A_75_P01042531		2	201031	0	1	0	0
A_75_P01042611		2	201863	0	1	0	0
A_75_P01042686		2	202640	0	1	0	0
A_75_P01042720		2	202986	0	1	0	0
A_75_P01042758		2	203385	0	1	0	0
A_75_P01042848		2	204323	0	1	0	0
A_75_P01042940		2	205204	0	1	0	0
A_75_P01043015		2	205992	0	1	0	0
A_75_P01043089		2	206721	0	1	0	0
A_75_P01043150		2	207339	0	1	0	0
A_75_P01043212		2	208001	0	1	0	0
A_75_P01043281		2	208633	0	1	0	0
A_75_P01043359		2	209373	0	1	0	0
A_75_P01043443		2	210191	0	1	0	0
A_75_P01043535		2	211104	0	1	0	0
A_75_P01043621		2	211938	0	1	0	0
A_75_P01043652		2	212283	0	1	0	0
A_75_P01043702		2	212807	0	1	0	0
A_75_P01043772		2	213574	0	1	0	0
A_75_P01043860		2	214484	0	1	0	0
A_75_P01043943		2	215327	0	1	0	0
A_75_P01044019		2	216034	0	1	0	0
A_75_P01044105		2	216896	0	1	0	0
A_75_P01044167		2	217528	0	1	0	0
A_75_P01044261		2	218421	0	1	0	0
A_75_P01044328		2	219076	0	1	0	0
A_75_P01044405		2	219867	0	1	0	0
A_75_P01044472		2	220575	0	1	0	0
A_75_P01045088		2	226877	0	1	0	0
A_75_P01045127		2	227244	0	1	0	0
A_75_P01045201		2	227997	0	1	0	0
A_75_P01045286		2	228885	0	1	0	0
A_75_P01045354		2	229554	0	1	0	0
A_75_P01045471		2	230671	0	1	0	0
A_75_P01045539		2	231370	0	1	0	0
A_75_P01045626		2	232222	0	1	0	0
A_75_P01045724		2	233190	0	1	0	0
A_75_P01045805		2	233982	0	1	0	0
A_75_P01045891		2	234839	0	1	0	0
A_75_P01046002		2	235962	0	1	0	0
A_75_P01046080		2	236697	0	1	0	0
A_75_P01046161		2	237483	0	1	0	0
A_75_P01046182		2	237687	0	1	0	0
A_75_P01046222		2	238067	0	1	0	0
A_75_P01046312		2	238977	0	1	0	0
A_75_P01046387		2	239745	0	1	0	0
A_75_P01046455		2	240366	0	1	0	0
A_75_P01046538		2	241231	1	1.10598	-0.747	0
A_75_P01046646		2	242297	1	1.10598	-0.747	0
A_75_P01046715		2	243019	0	1	0	0
A_75_P01046780		2	243687	0	1	0	0
A_75_P01046871		2	244567	0	1	0	0
A_75_P01046930		2	245148	0	1	0	0
A_75_P01047006		2	245909	0	1	0	0
A_75_P01047100		2	246805	0	1	0	0
A_75_P01047127		2	247149	0	1	0	0
A_75_P01047179		2	247651	0	1	0	0
A_75_P01047243		2	248271	0	1	0	0
A_75_P01047327		2	249139	0	1	0	0
A_75_P01047414		2	250008	0	1	0	0
A_75_P01047515		2	250978	0	1	0	0
A_75_P01047573		2	251584	0	1	0	0
A_75_P01047641		2	252221	0	1	0	0
A_75_P01047756		2	253356	0	1	0	0
A_75_P01047861		2	254360	0	1	0	0
A_75_P01047986		2	255628	0	1	0	0
A_75_P01048085		2	256658	0	1	0	0
A_75_P01048144		2	257254	0	1	0	0
A_75_P01048165		2	257478	0	1	0	0
A_75_P01048293		2	258779	0	1	0	0
A_75_P01048956		2	265418	0	1	0	0
A_75_P01049032		2	266209	0	1	0	0
A_75_P01049131		2	267221	0	1	0	0
A_75_P01049204		2	267952	0	1	0	0
A_75_P01049286		2	268746	0	1	0	0
A_75_P01049392		2	269871	0	1	0	0
A_75_P01049460		2	270591	0	1	0	0
A_75_P01049545		2	271413	0	1	0	0
A_75_P01049607		2	272073	0	1	0	0
A_75_P01049676		2	272789	0	1	0	0
A_75_P01049695		2	272979	0	1	0	0
A_75_P01049759		2	273651	0	1	0	0
A_75_P01049826		2	274291	0	1	0	0
A_75_P01049907		2	275141	0	1	0	0
A_75_P01049995		2	276008	0	1	0	0
A_75_P01050058		2	276651	0	1	0	0
A_75_P01050158		2	277640	0	1	0	0
A_75_P01050236		2	278441	0	1	0	0
A_75_P01050328		2	279361	0	1	0	0
A_75_P01050419		2	280294	0	1	0	0
A_75_P01050498		2	281102	0	1	0	0
A_75_P01050558		2	281729	0	1	0	0
A_75_P01050626		2	282367	0	1	0	0
A_75_P01050654		2	282634	0	1	0	0
A_75_P01050697		2	283084	0	1	0	0
A_75_P01050780		2	283912	0	1	0	0
A_75_P01050843		2	284577	0	1	0	0
A_75_P01050920		2	285351	0	1	0	0
A_75_P01050995		2	286132	0	1	0	0
A_75_P01051081		2	286952	0	1	0	0
A_75_P01051181		2	287928	0	1	0	0
A_75_P01051243		2	288604	0	1	0	0
A_75_P01051339		2	289550	0	1	0	0
A_75_P01051452		2	290669	0	1	0	0
A_75_P01051529		2	291449	0	1	0	0
A_75_P01051621		2	292448	0	1	0	0
A_75_P01051644		2	292690	0	1	0	0
A_75_P01051682		2	293080	0	1	0	0
A_75_P01051777		2	294013	0	1	0	0
A_75_P01051881		2	295042	0	1	0	0
A_75_P01051966		2	295921	0	1	0	0
A_75_P01052027		2	296524	0	1	0	0
A_75_P01052102		2	297286	0	1	0	0
A_75_P01052170		2	297987	0	1	0	0
A_75_P01052239		2	298627	0	1	0	0
A_75_P01052322		2	299460	0	1	0	0
A_75_P01052485		2	301177	0	1	0	0
A_75_P01052585		2	302194	0	1	0	0
A_75_P01052692		2	303236	0	1	0	0
A_75_P01052719		2	303536	0	1	0	0
A_75_P01052761		2	303949	0	1	0	0
A_75_P01052837		2	304728	0	1	0	0
A_75_P01052914		2	305503	0	1	0	0
A_75_P01052988		2	306245	0	1	0	0
A_75_P01053079		2	307153	0	1	0	0
A_75_P01053158		2	307907	0	1	0	0
A_75_P01053226		2	308565	0	1	0	0
A_75_P01053277		2	309086	0	1	0	0
A_75_P01053351		2	309842	0	1	0	0
A_75_P01053416		2	310494	0	1	0	0
A_75_P01053476		2	311100	0	1	0	0
A_75_P01053560		2	311980	0	1	0	0
A_75_P01053595		2	312379	0	1	0	0
A_75_P01053644		2	312858	0	1	0	0
A_75_P01053733		2	313717	0	1	0	0
A_75_P01053812		2	314535	0	1	0	0
A_75_P01053870		2	315133	0	1	0	0
A_75_P01053971		2	316112	0	1	0	0
A_75_P01054047		2	316913	0	1	0	0
A_75_P01054116		2	317581	0	1	0	0
A_75_P01054174		2	318181	0	1	0	0
A_75_P01054250		2	318950	0	1	0	0
A_75_P01054329		2	319755	0	1	0	0
A_75_P01054411		2	320548	0	1	0	0
A_75_P01054483		2	321301	0	1	0	0
A_75_P01054514		2	321602	0	1	0	0
A_75_P01054576		2	322251	0	1	0	0
A_75_P01054647		2	322952	0	1	0	0
A_75_P01054745		2	323927	0	1	0	0
A_75_P01054812		2	324587	0	1	0	0
A_75_P01054891		2	325410	0	1	0	0
A_75_P01054969		2	326230	0	1	0	0
A_75_P01055041		2	326937	0	1	0	0
A_75_P01055160		2	328135	0	1	0	0
A_75_P01055223		2	328774	0	1	0	0
A_75_P01055296		2	329487	0	1	0	0
A_75_P01055350		2	330068	0	1	0	0
A_75_P01055412		2	330733	0	1	0	0
A_75_P01055432		2	330939	0	1	0	0
A_75_P01055518		2	331773	0	1	0	0
A_75_P01055629		2	332850	0	1	0	0
A_75_P01055762		2	334201	0	1	0	0
A_75_P01055846		2	335068	0	1	0	0
A_75_P01055930		2	335891	0	1	0	0
A_75_P01056016		2	336712	0	1	0	0
A_75_P01056117		2	337718	0	1	0	0
A_75_P01056205		2	338617	0	1	0	0
A_75_P01056272		2	339264	0	1	0	0
A_75_P01056339		2	339901	0	1	0	0
A_75_P01056423		2	340690	0	1	0	0
A_75_P01056502		2	341432	1	1.10598	-0.777	0
A_75_P01056521		2	341613	1	1.10598	-0.777	0
A_75_P01056557		2	342020	0	1	0	0
A_75_P01056617		2	342630	0	1	0	0
A_75_P01056704		2	343476	0	1	0	0
A_75_P01056762		2	344164	0	1	0	0
A_75_P01056837		2	344881	0	1	0	0
A_75_P01056947		2	345975	0	1	0	0
A_75_P01057045		2	346949	0	1	0	0
A_75_P01057117		2	347678	0	1	0	0
A_75_P01057180		2	348327	0	1	0	0
A_75_P01057234		2	348901	0	1	0	0
A_75_P01057354		2	350081	0	1	0	0
A_75_P01057432		2	350867	0	1	0	0
A_75_P01057465		2	351191	0	1	0	0
A_75_P01057520		2	351707	0	1	0	0
A_75_P01057627		2	352777	0	1	0	0
A_75_P01057722		2	353754	0	1	0	0
A_75_P01057898		2	355507	0	1	0	0
A_75_P01057988		2	356411	0	1	0	0
A_75_P01058084		2	357451	0	1	0	0
A_75_P01058175		2	358398	0	1	0	0
A_75_P01058252		2	359132	0	1	0	0
A_75_P01058328		2	359964	0	1	0	0
A_75_P01058398		2	360656	0	1	0	0
A_75_P01058487		2	361556	0	1	0	0
A_75_P01058521		2	361903	0	1	0	0
A_75_P01058574		2	362428	0	1	0	0
A_75_P01058684		2	363559	0	1	0	0
A_75_P01058759		2	364342	0	1	0	0
A_75_P01058827		2	365042	0	1	0	0
A_75_P01058914		2	365923	0	1	0	0
A_75_P01058985		2	366599	0	1	0	0
A_75_P01059088		2	367591	0	1	0	0
A_75_P01059162		2	368386	0	1	0	0
A_75_P01059248		2	369251	0	1	0	0
A_75_P01059342		2	370207	0	1	0	0
A_75_P01059426		2	371081	0	1	0	0
A_75_P01059498		2	371883	0	1	0	0
A_75_P01059530		2	372276	0	1	0	0
A_75_P01059576		2	372751	0	1	0	0
A_75_P01059659		2	373570	0	1	0	0
A_75_P01059743		2	374424	0	1	0	0
A_75_P01059845		2	375405	0	1	0	0
A_75_P01059911		2	376087	0	1	0	0
A_75_P01059980		2	376798	0	1	0	0
A_75_P01060078		2	377742	0	1	0	0
A_75_P01060141		2	378375	0	1	0	0
A_75_P01060226		2	379229	0	1	0	0
A_75_P01060320		2	380095	0	1	0	0
A_75_P01060405		2	380970	0	1	0	0
A_75_P01060485		2	381775	0	1	0	0
A_75_P01060523		2	382153	0	1	0	0
A_75_P01060583		2	382776	0	1	0	0
A_75_P01060683		2	383765	0	1	0	0
A_75_P01060769		2	384640	1	1.10598	-0.756667	0
A_75_P01060846		2	385404	1	1.10598	-0.756667	0
A_75_P01060908		2	386036	1	1.10598	-0.756667	0
A_75_P01060979		2	386757	0	1	0	0
A_75_P01061048		2	387469	0	1	0	0
A_75_P01061134		2	388310	0	1	0	0
A_75_P01061207		2	389070	0	1	0	0
A_75_P01061287		2	389885	0	1	0	0
A_75_P01061342		2	390463	0	1	0	0
A_75_P01061430		2	391312	0	1	0	0
A_75_P01061477		2	391775	0	1	0	0
A_75_P01061538		2	392356	0	1	0	0
A_75_P01061620		2	393175	0	1	0	0
A_75_P01061688		2	393804	0	1	0	0
A_75_P01061755		2	394477	0	1	0	0
A_75_P01061848		2	395496	0	1	0	0
A_75_P01061939		2	396452	0	1	0	0
A_75_P01062014		2	397188	0	1	0	0
A_75_P01062064		2	397714	0	1	0	0
A_75_P01062145		2	398555	0	1	0	0
A_75_P01062238		2	399498	0	1	0	0
A_75_P01062308		2	400229	0	1	0	0
A_75_P01062406		2	401239	0	1	0	0
A_75_P01062425		2	401429	0	1	0	0
A_75_P01062462		2	401810	0	1	0	0
A_75_P01062583		2	403001	0	1	0	0
A_75_P01062643		2	403579	0	1	0	0
A_75_P01062699		2	404162	0	1	0	0
A_75_P01062785		2	405023	0	1	0	0
A_75_P01062889		2	406060	0	1	0	0
A_75_P01062951		2	406699	0	1	0	0
A_75_P01063038		2	407578	0	1	0	0
A_75_P01063120		2	408352	0	1	0	0
A_75_P01063261		2	409802	0	1	0	0
A_75_P01063376		2	410922	0	1	0	0
A_75_P01063466		2	411808	0	1	0	0
A_75_P01063485		2	411986	0	1	0	0
A_75_P01063524		2	412387	0	1	0	0
A_75_P01063595		2	413082	0	1	0	0
A_75_P01063676		2	413918	0	1	0	0
A_75_P01063784		2	415011	0	1	0	0
A_75_P01063863		2	415821	0	1	0	0
A_75_P01063920		2	416437	0	1	0	0
A_75_P01064014		2	417390	0	1	0	0
A_75_P01064112		2	418361	0	1	0	0
A_75_P01064218		2	419444	0	1	0	0
A_75_P01064287		2	420160	0	1	0	0
A_75_P01064407		2	421407	0	1	0	0
A_75_P01064492		2	422332	0	1	0	0
A_75_P01064542		2	422805	0	1	0	0
A_75_P01064602		2	423395	0	1	0	0
A_75_P01064702		2	424404	0	1	0	0
A_75_P01064756		2	424961	0	1	0	0
A_75_P01064833		2	425688	0	1	0	0
A_75_P01064915		2	426535	0	1	0	0
A_75_P01064988		2	427297	0	1	0	0
A_75_P01065089		2	428344	0	1	0	0
A_75_P01065147		2	428945	0	1	0	0
A_75_P01065260		2	430031	0	1	0	0
A_75_P01065350		2	430989	0	1	0	0
A_75_P01065455		2	432010	0	1	0	0
A_75_P01065531		2	432798	0	1	0	0
A_75_P01065566		2	433129	0	1	0	0
A_75_P01065619		2	433647	0	1	0	0
A_75_P01065732		2	434788	0	1	0	0
A_75_P01065813		2	435599	0	1	0	0
A_75_P01065887		2	436355	0	1	0	0
A_75_P01065957		2	437084	0	1	0	0
A_75_P01066061		2	438082	0	1	0	0
A_75_P01066130		2	438754	0	1	0	0
A_75_P01066244		2	439847	0	1	0	0
A_75_P01066303		2	440457	0	1	0	0
A_75_P01066392		2	441303	0	1	0	0
A_75_P01066482		2	442245	0	1	0	0
A_75_P01066584		2	443314	0	1	0	0
A_75_P01066612		2	443588	0	1	0	0
A_75_P01066679		2	444257	0	1	0	0
A_75_P01066752		2	445030	0	1	0	0
A_75_P01066821		2	445725	0	1	0	0
A_75_P01066895		2	446434	0	1	0	0
A_75_P01067003		2	447554	0	1	0	0
A_75_P01067101		2	448558	0	1	0	0
A_75_P01067276		2	450302	0	1	0	0
A_75_P01067350		2	451078	0	1	0	0
A_75_P01067410		2	451715	0	1	0	0
A_75_P01067469		2	452318	0	1	0	0
A_75_P01067532		2	452882	0	1	0	0
A_75_P01067558		2	453157	0	1	0	0
A_75_P01067610		2	453654	0	1	0	0
A_75_P01067693		2	454446	0	1	0	0
A_75_P01067760		2	455154	0	1	0	0
A_75_P01067858		2	456214	0	1	0	0
A_75_P01067927		2	456980	0	1	0	0
A_75_P01067998		2	457701	0	1	0	0
A_75_P01068086		2	458585	0	1	0	0
A_75_P01068147		2	459253	0	1	0	0
A_75_P01068210		2	459925	0	1	0	0
A_75_P01068281		2	460645	0	1	0	0
A_75_P01068377		2	461661	0	1	0	0
A_75_P01068434		2	462224	0	1	0	0
A_75_P01068457		2	462455	0	1	0	0
A_75_P01068507		2	462943	0	1	0	0
A_75_P01068580		2	463657	0	1	0	0
A_75_P01068639		2	464259	0	1	0	0
A_75_P01068718		2	465097	1	1.10598	0	-0.769333
A_75_P01068825		2	466160	2	0.173737	-0.753	-0.769333
A_75_P01068913		2	467060	2	0.173737	-0.753	-0.769333
A_75_P01068999		2	467938	0	1	0	0
A_75_P01069101		2	468982	1	1.10598	0	0
A_75_P01069184		2	469818	1	1.10598	0	0
A_75_P01069253		2	470518	1	1.10598	0	0
A_75_P01069343		2	471453	1	1.10598	0	0
A_75_P01069422		2	472259	1	1.10598	0	0
A_75_P01069446		2	472496	0	1	0	0
A_75_P01069492		2	472962	0	1	0	0
A_75_P01069578		2	473848	0	1	0	0
A_75_P01069703		2	475139	0	1	0	0
A_75_P01069776		2	475896	0	1	0	0
A_75_P01069851		2	476678	0	1	0	0
A_75_P01069921		2	477386	0	1	0	0
A_75_P01070090		2	479233	0	1	0	0
A_75_P01070190		2	480245	0	1	0	0
A_75_P01070274		2	481088	0	1	0	0
A_75_P01070346		2	481827	0	1	0	0
A_75_P01070412		2	482464	0	1	0	0
A_75_P01070490		2	483224	0	1	0	0
A_75_P01070518		2	483533	0	1	0	0
A_75_P01070591		2	484288	0	1	0	0
A_75_P01070677		2	485202	0	1	0	0
A_75_P01070758		2	486012	0	1	0	0
A_75_P01070860		2	487057	0	1	0	0
A_75_P01070967		2	488160	0	1	0	0
A_75_P01071051		2	488955	0	1	0	0
A_75_P01071119		2	489725	0	1	0	0
A_75_P01071218		2	490788	0	1	0	0
A_75_P01071321		2	491806	0	1	0	0
A_75_P01071413		2	492772	0	1	0	0
A_75_P01071491		2	493640	0	1	0	0
A_75_P01071582		2	494549	0	1	0	0
A_75_P01071629		2	495007	0	1	0	0
A_75_P01071707		2	495794	0	1	0	0
A_75_P01071812		2	496784	0	1	0	0
A_75_P01071900		2	497631	0	1	0	0
A_75_P01071971		2	498344	0	1	0	0
A_75_P01072052		2	499130	0	1	0	0
A_75_P01072111		2	499691	0	1	0	0
A_75_P01072205		2	500579	0	1	0	0
A_75_P01072294		2	501534	0	1	0	0
A_75_P01072352		2	502111	0	1	0	0
A_75_P01072412		2	502727	0	1	0	0
A_75_P01072487		2	503488	0	1	0	0
A_75_P01072569		2	504372	0	1	0	0
A_75_P01072606		2	504697	0	1	0	0
A_75_P01072655		2	505224	0	1	0	0
A_75_P01072733		2	506039	0	1	0	0
A_75_P01072832		2	507065	0	1	0	0
A_75_P01072894		2	507687	0	1	0	0
A_75_P01072963		2	508377	0	1	0	0
A_75_P01073052		2	509306	0	1	0	0
A_75_P01073140		2	510191	0	1	0	0
A_75_P01073210		2	510839	0	1	0	0
A_75_P01073293		2	511682	0	1	0	0
A_75_P01073391		2	512656	0	1	0	0
A_75_P01073499		2	513784	0	1	0	0
A_75_P01073587		2	514645	0	1	0	0
A_75_P01073615		2	514936	0	1	0	0
A_75_P01073663		2	515423	0	1	0	0
A_75_P01073769		2	516489	0	1	0	0
A_75_P01073834		2	517155	0	1	0	0
A_75_P01073902		2	517845	0	1	0	0
A_75_P01073960		2	518410	0	1	0	0
A_75_P01074040		2	519273	0	1	0	0
A_75_P01074119		2	520036	0	1	0	0
A_75_P01074218		2	521017	0	1	0	0
A_75_P01074296		2	521806	0	1	0	0
A_75_P01074401		2	522909	0	1	0	0
A_75_P01074472		2	523561	0	1	0	0
A_75_P01074549		2	524349	0	1	0	0
A_75_P01074564		2	524528	0	1	0	0
A_75_P01074632		2	525212	0	1	0	0
A_75_P01074729		2	526242	0	1	0	0
A_75_P01074800		2	526914	1	1.10598	0	0
A_75_P01074880		2	527733	1	1.10598	0	0
A_75_P01074979		2	528755	3	0.00643189	0	-0.770333
A_75_P01075116		2	530075	4	0.00013404	-0.746	-0.770333
A_75_P01075223		2	531202	4	0.00013404	-0.746	-0.770333
A_75_P01075288		2	531913	4	0.00013404	-0.746	-0.770333
A_75_P01075360		2	532621	4	0.00013404	-0.746	-0.770333
A_75_P01075427		2	533362	2	0.173737	0	-0.770333
A_75_P01075499		2	534039	0	1	0	0
A_75_P01075564		2	534728	0	1	0	0
A_75_P01075584		2	534919	0	1	0	0
A_75_P01075645		2	535548	0	1	0	0
A_75_P01075754		2	536664	0	1	0	0
A_75_P01075828		2	537420	0	1	0	0
A_75_P01075917		2	538337	0	1	0	0
A_75_P01075991		2	539063	0	1	0	0
A_75_P01076077		2	539869	0	1	0	0
A_75_P01076167		2	540755	0	1	0	0
A_75_P01076253		2	541612	0	1	0	0
A_75_P01076340		2	542501	0	1	0	0
A_75_P01076485		2	543906	0	1	0	0
A_75_P01076549		2	544549	0	1	0	0
A_75_P01076563		2	544713	0	1	0	0
A_75_P01076609		2	545168	0	1	0	0
A_75_P01076673		2	545819	0	1	0	0
A_75_P01076758		2	546643	0	1	0	0
A_75_P01076852		2	547592	0	1	0	0
A_75_P01076975		2	548878	0	1	0	0
A_75_P01077046		2	549659	0	1	0	0
A_75_P01077150		2	550719	0	1	0	0
A_75_P01077271		2	551908	0	1	0	0
A_75_P01077371		2	552922	0	1	0	0
A_75_P01077454		2	553740	0	1	0	0
A_75_P01077531		2	554502	0	1	0	0
A_75_P01077612		2	555332	0	1	0	0
A_75_P01077635		2	555544	0	1	0	0
A_75_P01077686		2	556075	0	1	0	0
A_75_P01077760		2	556868	0	1	0	0
A_75_P01077816		2	557437	0	1	0	0
A_75_P01077910		2	558338	0	1	0	0
A_75_P01077971		2	558946	0	1	0	0
A_75_P01078041		2	559649	0	1	0	0
A_75_P01078121		2	560446	0	1	0	0
A_75_P01078199		2	561189	0	1	0	0
A_75_P01078283		2	562031	0	1	0	0
A_75_P01078380		2	563048	0	1	0	0
A_75_P01078454		2	563796	0	1	0	0
A_75_P01078551		2	564792	0	1	0	0
A_75_P01078576		2	565024	0	1	0	0
A_75_P01078624		2	565507	0	1	0	0
A_75_P01078719		2	566475	0	1	0	0
A_75_P01078799		2	567302	0	1	0	0
A_75_P01078871		2	568039	0	1	0	0
A_75_P01078966		2	568986	0	1	0	0
A_75_P01079068		2	570028	0	1	0	0
A_75_P01079134		2	570676	0	1	0	0
A_75_P01079192		2	571286	0	1	0	0
A_75_P01079277		2	572141	0	1	0	0
A_75_P01079346		2	572798	0	1	0	0
A_75_P01079438		2	573679	0	1	0	0
A_75_P01079519		2	574497	0	1	0	0
A_75_P01079543		2	574742	0	1	0	0
A_75_P01079637		2	575668	0	1	0	0
A_75_P01079736		2	576680	0	1	0	0
A_75_P01079799		2	577325	0	1	0	0
A_75_P01079891		2	578250	0	1	0	0
A_75_P01079977		2	579082	0	1	0	0
A_75_P01080036		2	579688	0	1	0	0
A_75_P01080109		2	580494	0	1	0	0
A_75_P01080212		2	581538	0	1	0	0
A_75_P01080295		2	582389	0	1	0	0
A_75_P01080368		2	583145	0	1	0	0
A_75_P01080508		2	584514	0	1	0	0
A_75_P01080568		2	585219	0	1	0	0
A_75_P01080590		2	585446	0	1	0	0
A_75_P01080643		2	585986	0	1	0	0
A_75_P01080730		2	586873	0	1	0	0
A_75_P01080812		2	587689	0	1	0	0
A_75_P01080893		2	588511	0	1	0	0
A_75_P01080976		2	589338	0	1	0	0
A_75_P01081050		2	590108	0	1	0	0
A_75_P01081142		2	591042	0	1	0	0
A_75_P01081202		2	591658	0	1	0	0
A_75_P01081314		2	592805	0	1	0	0
A_75_P01081373		2	593437	0	1	0	0
A_75_P01081426		2	593999	0	1	0	0
A_75_P01081495		2	594698	0	1	0	0
A_75_P01081514		2	594895	0	1	0	0
A_75_P01081583		2	595583	0	1	0	0
A_75_P01081685		2	596538	0	1	0	0
A_75_P01081769		2	597395	0	1	0	0
A_75_P01081832		2	597999	0	1	0	0
A_75_P01081907		2	598743	0	1	0	0
A_75_P01082024		2	599869	0	1	0	0
A_75_P01082131		2	600907	0	1	0	0
A_75_P01082213		2	601732	0	1	0	0
A_75_P01082277		2	602327	0	1	0	0
A_75_P01082352		2	603111	0	1	0	0
A_75_P01082424		2	603874	0	1	0	0
A_75_P01082514		2	604758	0	1	0	0
A_75_P01082547		2	605094	0	1	0	0
A_75_P01082597		2	605631	0	1	0	0
A_75_P01082698		2	606670	0	1	0	0
A_75_P01082752		2	607248	0	1	0	0
A_75_P01082824		2	607955	0	1	0	0
A_75_P01082915		2	608872	0	1	0	0
A_75_P01082992		2	609676	0	1	0	0
A_75_P01083062		2	610380	0	1	0	0
A_75_P01083129		2	611082	0	1	0	0
A_75_P01083188		2	611702	0	1	0	0
A_75_P01083266		2	612581	0	1	0	0
A_75_P01083341		2	613383	1	1.10598	0	-0.79
A_75_P01083436		2	614327	1	1.10598	0	-0.79
A_75_P01083465		2	614628	1	1.10598	0	-0.79
A_75_P01083524		2	615239	0	1	0	0
A_75_P01083602		2	616044	0	1	0	0
A_75_P01083683		2	616855	0	1	0	0
A_75_P01083755		2	617588	0	1	0	0
A_75_P01083834		2	618434	0	1	0	0
A_75_P01083931		2	619416	0	1	0	0
A_75_P01084002		2	620150	0	1	0	0
A_75_P01084083		2	620993	0	1	0	0
A_75_P01084154		2	621715	0	1	0	0
A_75_P01084210		2	622308	0	1	0	0
A_75_P01084315		2	623319	0	1	0	0
A_75_P01084391		2	624084	0	1	0	0
A_75_P01084423		2	624451	0	1	0	0
A_75_P01084462		2	624857	0	1	0	0
A_75_P01084549		2	625735	0	1	0	0
A_75_P01084640		2	626598	0	1	0	0
A_75_P01084718		2	627342	0	1	0	0
A_75_P01084813		2	628273	0	1	0	0
A_75_P01084869		2	628922	0	1	0	0
A_75_P01084932		2	629544	0	1	0	0
A_75_P01085023		2	630480	0	1	0	0
A_75_P01085121		2	631539	0	1	0	0
A_75_P01085221		2	632568	0	1	0	0
A_75_P01085279		2	633155	0	1	0	0
A_75_P01085364		2	634067	0	1	0	0
A_75_P01085421		2	634641	0	1	0	0
A_75_P01085492		2	635379	0	1	0	0
A_75_P01085547		2	635935	0	1	0	0
A_75_P01085646		2	636904	0	1	0	0
A_75_P01085766		2	638149	0	1	0	0
A_75_P01085852		2	639042	0	1	0	0
A_75_P01085941		2	639905	0	1	0	0
A_75_P01086030		2	640780	0	1	0	0
A_75_P01086102		2	641479	0	1	0	0
A_75_P01086203		2	642528	0	1	0	0
A_75_P01086325		2	643801	0	1	0	0
A_75_P01086439		2	644960	0	1	0	0
A_75_P01086473		2	645276	0	1	0	0
A_75_P01086541		2	645947	0	1	0	0
A_75_P01086619		2	646726	0	1	0	0
A_75_P01086683		2	647346	0	1	0	0
A_75_P01086751		2	648045	0	1	0	0
A_75_P01086840		2	648947	0	1	0	0
A_75_P01086921		2	649746	0	1	0	0
A_75_P01086989		2	650429	0	1	0	0
A_75_P01087074		2	651249	0	1	0	0
A_75_P01087188		2	652386	0	1	0	0
A_75_P01087268		2	653243	0	1	0	0
A_75_P01087374		2	654300	0	1	0	0
A_75_P01087458		2	655169	0	1	0	0
A_75_P01087486		2	655471	0	1	0	0
A_75_P01087536		2	655973	0	1	0	0
A_75_P01087661		2	657251	0	1	0	0
A_75_P01087747		2	658061	0	1	0	0
A_75_P01087831		2	658929	0	1	0	0
A_75_P01087915		2	659798	0	1	0	0
A_75_P01088000		2	660701	0	1	0	0
A_75_P01088096		2	661690	0	1	0	0
A_75_P01088160		2	662404	0	1	0	0
A_75_P01088245		2	663291	0	1	0	0
A_75_P01088354		2	664460	0	1	0	0
A_75_P01088450		2	665449	0	1	0	0
A_75_P01088530		2	666238	0	1	0	0
A_75_P01088560		2	666538	0	1	0	0
A_75_P01088609		2	667069	0	1	0	0
A_75_P01088682		2	667802	0	1	0	0
A_75_P01088793		2	668973	0	1	0	0
A_75_P01088884		2	669847	0	1	0	0
A_75_P01088978		2	670742	0	1	0	0
A_75_P01089049		2	671488	0	1	0	0
A_75_P01089124		2	672238	0	1	0	0
A_75_P01089214		2	673166	0	1	0	0
A_75_P01089303		2	674053	0	1	0	0
A_75_P01089405		2	675071	0	1	0	0
A_75_P01089468		2	675722	0	1	0	0
A_75_P01089558		2	676583	0	1	0	0
A_75_P01089582		2	676820	0	1	0	0
A_75_P01089639		2	677374	0	1	0	0
A_75_P01089719		2	678186	0	1	0	0
A_75_P01089793		2	678928	0	1	0	0
A_75_P01089902		2	679940	0	1	0	0
A_75_P01090009		2	681037	0	1	0	0
A_75_P01090113		2	682096	0	1	0	0
A_75_P01090179		2	682831	0	1	0	0
A_75_P01090246		2	683570	0	1	0	0
A_75_P01090333		2	684424	0	1	0	0
A_75_P01090426		2	685395	0	1	0	0
A_75_P01090516		2	686332	0	1	0	0
A_75_P01090597		2	687147	0	1	0	0
A_75_P01090616		2	687333	0	1	0	0
A_75_P01090663		2	687804	0	1	0	0
A_75_P01090759		2	688755	0	1	0	0
A_75_P01090831		2	689510	0	1	0	0
A_75_P01090918		2	690427	0	1	0	0
A_75_P01090974		2	690989	0	1	0	0
A_75_P01091062		2	691851	0	1	0	0
A_75_P01091130		2	692552	0	1	0	0
A_75_P01091235		2	693629	0	1	0	0
A_75_P01091344		2	694675	0	1	0	0
A_75_P01091419		2	695449	0	1	0	0
A_75_P01091505		2	696349	0	1	0	0
A_75_P01091609		2	697388	0	1	0	0
A_75_P01091628		2	697596	0	1	0	0
A_75_P01091687		2	698171	0	1	0	0
A_75_P01091755		2	698879	0	1	0	0
A_75_P01091851		2	699887	0	1	0	0
A_75_P01091936		2	700731	0	1	0	0
A_75_P01092019		2	701590	0	1	0	0
A_75_P01092082		2	702232	0	1	0	0
A_75_P01092147		2	702970	0	1	0	0
A_75_P01092241		2	703991	0	1	0	0
A_75_P01092314		2	704716	0	1	0	0
A_75_P01092401		2	705619	0	1	0	0
A_75_P01092485		2	706470	0	1	0	0
A_75_P01092550		2	707114	0	1	0	0
A_75_P01092591		2	707523	0	1	0	0
A_75_P01092654		2	708159	0	1	0	0
A_75_P01092724		2	708819	0	1	0	0
A_75_P01092827		2	709781	0	1	0	0
A_75_P01092890		2	710428	0	1	0	0
A_75_P01092984		2	711467	0	1	0	0
A_75_P01093072		2	712323	0	1	0	0
A_75_P01093140		2	713026	0	1	0	0
A_75_P01093284		2	714476	0	1	0	0
A_75_P01093346		2	715159	0	1	0	0
A_75_P01093429		2	716045	0	1	0	0
A_75_P01093537		2	717078	0	1	0	0
A_75_P01093610		2	717863	0	1	0	0
A_75_P01093645		2	718234	0	1	0	0
A_75_P01093686		2	718702	0	1	0	0
A_75_P01093784		2	719693	0	1	0	0
A_75_P01093846		2	720315	0	1	0	0
A_75_P01093908		2	720940	0	1	0	0
A_75_P01093964		2	721507	0	1	0	0
A_75_P01094072		2	722553	0	1	0	0
A_75_P01094146		2	723288	0	1	0	0
A_75_P01094214		2	723943	0	1	0	0
A_75_P01094273		2	724534	0	1	0	0
A_75_P01094351		2	725306	0	1	0	0
A_75_P01094450		2	726317	0	1	0	0
A_75_P01094567		2	727443	0	1	0	0
A_75_P01094585		2	727647	0	1	0	0
A_75_P01094618		2	728020	0	1	0	0
A_75_P01094685		2	728723	0	1	0	0
A_75_P01094834		2	730242	0	1	0	0
A_75_P01094940		2	731284	0	1	0	0
A_75_P01095008		2	731972	0	1	0	0
A_75_P01095113		2	733039	0	1	0	0
A_75_P01095188		2	733774	0	1	0	0
A_75_P01095269		2	734570	0	1	0	0
A_75_P01095371		2	735599	0	1	0	0
A_75_P01095443		2	736352	0	1	0	0
A_75_P01095543		2	737364	0	1	0	0
A_75_P01095563		2	737573	0	1	0	0
A_75_P01095605		2	738044	0	1	0	0
A_75_P01095693		2	738932	0	1	0	0
A_75_P01095775		2	739753	0	1	0	0
A_75_P01095851		2	740529	0	1	0	0
A_75_P01095950		2	741546	0	1	0	0
A_75_P01096049		2	742544	0	1	0	0
A_75_P01096125		2	743309	0	1	0	0
A_75_P01096257		2	744609	0	1	0	0
A_75_P01096316		2	745205	0	1	0	0
A_75_P01096407		2	746156	0	1	0	0
A_75_P01096516		2	747230	0	1	0	0
A_75_P01096631		2	748416	0	1	0	0
A_75_P01096648		2	748609	0	1	0	0
A_75_P01096714		2	749276	0	1	0	0
A_75_P01096795		2	750100	0	1	0	0
A_75_P01096888		2	751026	0	1	0	0
A_75_P01096981		2	751963	0	1	0	0
A_75_P01097070		2	752872	0	1	0	0
A_75_P01097148		2	753658	0	1	0	0
A_75_P01097219		2	754363	0	1	0	0
A_75_P01097292		2	755117	0	1	0	0
A_75_P01097368		2	755943	0	1	0	0
A_75_P01097442		2	756682	0	1	0	0
A_75_P01097533		2	757610	0	1	0	0
A_75_P01097617		2	758457	0	1	0	0
A_75_P01097635		2	758628	0	1	0	0
A_75_P01097694		2	759236	0	1	0	0
A_75_P01097793		2	760230	0	1	0	0
A_75_P01097860		2	760907	0	1	0	0
A_75_P01097955		2	761893	0	1	0	0
A_75_P01098034		2	762707	0	1	0	0
A_75_P01098144		2	763781	0	1	0	0
A_75_P01098237		2	764710	0	1	0	0
A_75_P01098318		2	765554	0	1	0	0
A_75_P01098401		2	766397	0	1	0	0
A_75_P01098481		2	767204	0	1	0	0
A_75_P01098555		2	767937	0	1	0	0
A_75_P01098620		2	768598	0	1	0	0
A_75_P01098641		2	768815	0	1	0	0
A_75_P01098709		2	769482	0	1	0	0
A_75_P01098798		2	770332	0	1	0	0
A_75_P01098879		2	771160	0	1	0	0
A_75_P01098960		2	771994	0	1	0	0
A_75_P01099058		2	772966	0	1	0	0
A_75_P01099147		2	773834	0	1	0	0
A_75_P01099213		2	774522	0	1	0	0
A_75_P01099304		2	775449	0	1	0	0
A_75_P01099419		2	776639	0	1	0	0
A_75_P01099514		2	777550	0	1	0	0
A_75_P01099610		2	778548	0	1	0	0
A_75_P01099665		2	779106	0	1	0	0
A_75_P01099700		2	779461	0	1	0	0
A_75_P01099754		2	779987	0	1	0	0
A_75_P01099839		2	780884	0	1	0	0
A_75_P01099928		2	781781	0	1	0	0
A_75_P01100004		2	782555	0	1	0	0
A_75_P01100088		2	783463	0	1	0	0
A_75_P01100222		2	784781	0	1	0	0
A_75_P01100300		2	785574	0	1	0	0
A_75_P01100394		2	786499	0	1	0	0
A_75_P01100461		2	787168	0	1	0	0
A_75_P01100536		2	787930	0	1	0	0
A_75_P01100637		2	788900	0	1	0	0
A_75_P01100726		2	789779	0	1	0	0
A_75_P01100745		2	789959	0	1	0	0
A_75_P01100792		2	790472	0	1	0	0
A_75_P01100869		2	791291	0	1	0	0
A_75_P01100932		2	791974	0	1	0	0
A_75_P01100997		2	792609	0	1	0	0
A_75_P01101060		2	793335	0	1	0	0
A_75_P01101144		2	794196	0	1	0	0
A_75_P01101244		2	795222	0	1	0	0
A_75_P01101361		2	796407	0	1	0	0
A_75_P01101438		2	797139	0	1	0	0
A_75_P01101513		2	797903	0	1	0	0
A_75_P01101610		2	798832	0	1	0	0
A_75_P01101715		2	799905	0	1	0	0
A_75_P01101746		2	800225	0	1	0	0
A_75_P01101811		2	800872	0	1	0	0
A_75_P01101907		2	801855	0	1	0	0
A_75_P01102012		2	802934	0	1	0	0
A_75_P01102091		2	803689	0	1	0	0
A_75_P01102174		2	804601	0	1	0	0
A_75_P01102543		2	808296	0	1	0	0
A_75_P01103118		3	1147	0	1	0	0
A_75_P01103195		3	1930	0	1	0	0
A_75_P01103251		3	2502	0	1	0	0
A_75_P01103334		3	3347	0	1	0	0
A_75_P01103421		3	4294	0	1	0	0
A_75_P01103535		3	5386	1	1.10598	0	0
A_75_P01103542		3	5444	1	1.10598	0	0
A_75_P01103837		3	8317	1	1.10598	0	0
A_75_P01103926		3	9230	1	1.10598	0	0
A_75_P01104398		3	13987	1	1.10598	0	0
A_75_P01104456		3	14595	1	1.10598	0	0
A_75_P01104542		3	15480	1	1.10598	0	0
A_75_P01104648		3	16495	1	1.10598	0	0
A_75_P01104721		3	17226	0	1	0	0
A_75_P01104812		3	18101	0	1	0	0
A_75_P01104893		3	18949	0	1	0	0
A_75_P01104994		3	19945	0	1	0	0
A_75_P01105099		3	20998	0	1	0	0
A_75_P01105190		3	21907	0	1	0	0
A_75_P01105209		3	22093	0	1	0	0
A_75_P01105282		3	22853	0	1	0	0
A_75_P01105363		3	23680	0	1	0	0
A_75_P01105444		3	24565	0	1	0	0
A_75_P01105533		3	25458	0	1	0	0
A_75_P01105592		3	26066	0	1	0	0
A_75_P01105791		3	28043	0	1	0	0
A_75_P01105871		3	28882	0	1	0	0
A_75_P01105971		3	29841	0	1	0	0
A_75_P01106034		3	30473	0	1	0	0
A_75_P01106091		3	31079	0	1	0	0
A_75_P01106181		3	32012	0	1	0	0
A_75_P01106209		3	32290	0	1	0	0
A_75_P01106283		3	33069	0	1	0	0
A_75_P01106401		3	34211	0	1	0	0
A_75_P01106486		3	35074	0	1	0	0
A_75_P01106570		3	35887	0	1	0	0
A_75_P01106643		3	36621	0	1	0	0
A_75_P01106718		3	37398	0	1	0	0
A_75_P01106826		3	38503	0	1	0	0
A_75_P01106896		3	39213	0	1	0	0
A_75_P01106967		3	39932	0	1	0	0
A_75_P01107055		3	40855	0	1	0	0
A_75_P01107114		3	41451	0	1	0	0
A_75_P01107180		3	42128	0	1	0	0
A_75_P01107199		3	42323	0	1	0	0
A_75_P01107288		3	43182	0	1	0	0
A_75_P01107369		3	44000	0	1	0	0
A_75_P01107474		3	44997	0	1	0	0
A_75_P01107577		3	45992	0	1	0	0
A_75_P01107662		3	46845	0	1	0	0
A_75_P01107732		3	47540	0	1	0	0
A_75_P01107795		3	48155	0	1	0	0
A_75_P01107859		3	48792	0	1	0	0
A_75_P01107928		3	49523	0	1	0	0
A_75_P01107990		3	50205	0	1	0	0
A_75_P01108079		3	51111	0	1	0	0
A_75_P01108161		3	51975	0	1	0	0
A_75_P01108196		3	52334	0	1	0	0
A_75_P01108243		3	52814	0	1	0	0
A_75_P01108328		3	53720	0	1	0	0
A_75_P01108405		3	54512	0	1	0	0
A_75_P01108466		3	55163	0	1	0	0
A_75_P01108539		3	55895	0	1	0	0
A_75_P01108607		3	56575	0	1	0	0
A_75_P01108686		3	57326	0	1	0	0
A_75_P01108775		3	58230	0	1	0	0
A_75_P01108841		3	58915	0	1	0	0
A_75_P01108910		3	59689	0	1	0	0
A_75_P01108982		3	60418	0	1	0	0
A_75_P01109091		3	61567	0	1	0	0
A_75_P01109109		3	61750	0	1	0	0
A_75_P01109170		3	62421	0	1	0	0
A_75_P01109250		3	63248	0	1	0	0
A_75_P01109317		3	63956	0	1	0	0
A_75_P01109420		3	64924	0	1	0	0
A_75_P01109504		3	65769	0	1	0	0
A_75_P01109588		3	66615	0	1	0	0
A_75_P01109656		3	67323	0	1	0	0
A_75_P01109744		3	68259	0	1	0	0
A_75_P01109808		3	68948	0	1	0	0
A_75_P01109878		3	69687	0	1	0	0
A_75_P01109947		3	70418	0	1	0	0
A_75_P01110016		3	71144	0	1	0	0
A_75_P01110043		3	71433	0	1	0	0
A_75_P01110105		3	72030	0	1	0	0
A_75_P01110189		3	72902	0	1	0	0
A_75_P01110290		3	73935	0	1	0	0
A_75_P01110405		3	75142	0	1	0	0
A_75_P01110463		3	75758	0	1	0	0
A_75_P01110547		3	76615	0	1	0	0
A_75_P01110619		3	77337	0	1	0	0
A_75_P01110696		3	78129	0	1	0	0
A_75_P01110744		3	78652	0	1	0	0
A_75_P01110809		3	79361	0	1	0	0
A_75_P01110893		3	80218	0	1	0	0
A_75_P01110974		3	80977	0	1	0	0
A_75_P01110997		3	81214	0	1	0	0
A_75_P01111044		3	81721	0	1	0	0
A_75_P01111141		3	82646	0	1	0	0
A_75_P01111231		3	83515	0	1	0	0
A_75_P01111306		3	84263	0	1	0	0
A_75_P01111937		3	90734	0	1	0	0
A_75_P01112020		3	91614	0	1	0	0
A_75_P01112112		3	92609	0	1	0	0
A_75_P01112181		3	93305	0	1	0	0
A_75_P01112272		3	94234	0	1	0	0
A_75_P01112374		3	95241	0	1	0	0
A_75_P01112470		3	96134	0	1	0	0
A_75_P01112545		3	96924	0	1	0	0
A_75_P01112567		3	97133	0	1	0	0
A_75_P01112642		3	97849	0	1	0	0
A_75_P01112734		3	98821	0	1	0	0
A_75_P01112801		3	99574	0	1	0	0
A_75_P01112853		3	100139	0	1	0	0
A_75_P01112918		3	100810	0	1	0	0
A_75_P01112994		3	101620	0	1	0	0
A_75_P01113077		3	102488	0	1	0	0
A_75_P01113169		3	103361	0	1	0	0
A_75_P01113216		3	103865	0	1	0	0
A_75_P01113309		3	104848	0	1	0	0
A_75_P01113379		3	105615	0	1	0	0
A_75_P01113457		3	106518	0	1	0	0
A_75_P01113479		3	106724	0	1	0	0
A_75_P01113522		3	107177	0	1	0	0
A_75_P01113624		3	108187	0	1	0	0
A_75_P01113697		3	108925	0	1	0	0
A_75_P01113804		3	109988	0	1	0	0
A_75_P01113880		3	110763	0	1	0	0
A_75_P01113955		3	111492	0	1	0	0
A_75_P01114033		3	112264	0	1	0	0
A_75_P01114106		3	112969	0	1	0	0
A_75_P01114172		3	113652	0	1	0	0
A_75_P01114244		3	114378	0	1	0	0
A_75_P01114316		3	115089	0	1	0	0
A_75_P01114382		3	115758	0	1	0	0
A_75_P01114413		3	116072	0	1	0	0
A_75_P01114490		3	116815	0	1	0	0
A_75_P01114546		3	117391	0	1	0	0
A_75_P01114623		3	118244	0	1	0	0
A_75_P01114717		3	119153	0	1	0	0
A_75_P01114786		3	119851	0	1	0	0
A_75_P01114843		3	120442	0	1	0	0
A_75_P01114910		3	121095	0	1	0	0
A_75_P01115013		3	122159	0	1	0	0
A_75_P01115158		3	123705	0	1	0	0
A_75_P01115259		3	124738	0	1	0	0
A_75_P01115349		3	125685	0	1	0	0
A_75_P01115398		3	126201	0	1	0	0
A_75_P01115459		3	126756	0	1	0	0
A_75_P01115519		3	127381	0	1	0	0
A_75_P01115580		3	127991	0	1	0	0
A_75_P01115705		3	129186	0	1	0	0
A_75_P01115780		3	129861	0	1	0	0
A_75_P01115850		3	130591	0	1	0	0
A_75_P01115938		3	131443	0	1	0	0
A_75_P01115999		3	132071	0	1	0	0
A_75_P01116081		3	132942	0	1	0	0
A_75_P01116177		3	133917	0	1	0	0
A_75_P01116257		3	134730	0	1	0	0
A_75_P01116330		3	135447	0	1	0	0
A_75_P01116348		3	135630	0	1	0	0
A_75_P01116400		3	136178	0	1	0	0
A_75_P01116483		3	136963	0	1	0	0
A_75_P01116582		3	137957	0	1	0	0
A_75_P01116653		3	138683	0	1	0	0
A_75_P01116726		3	139416	0	1	0	0
A_75_P01116814		3	140293	0	1	0	0
A_75_P01116888		3	141007	1	1.10598	-0.809	0
A_75_P01116963		3	141759	1	1.10598	-0.809	0
A_75_P01117045		3	142584	1	1.10598	-0.809	0
A_75_P01117131		3	143416	1	1.10598	-0.809	0
A_75_P01117200		3	144122	1	1.10598	0	0
A_75_P01117287		3	145005	1	1.10598	0	0
A_75_P01117326		3	145410	1	1.10598	0	0
A_75_P01117398		3	146164	1	1.10598	0	0
A_75_P01117477		3	146928	2	0.173737	-0.7402	0
A_75_P01117565		3	147834	2	0.173737	-0.7402	0
A_75_P01117624		3	148437	3	0.00643189	-0.7402	-0.771
A_75_P01117712		3	149296	3	0.00643189	-0.7402	-0.771
A_75_P01117798		3	150149	3	0.00643189	-0.7402	-0.771
A_75_P01117873		3	150927	3	0.00643189	0	-0.771
A_75_P01117974		3	151975	4	0.00013404	1.08667	0.983267
A_75_P01118051		3	152726	4	0.00013404	1.08667	0.983267
A_75_P01118123		3	153447	4	0.00013404	1.08667	0.983267
A_75_P01118200		3	154253	4	0.00013404	1.08667	0.983267
A_75_P01118270		3	154981	4	0.00013404	1.08667	0.983267
A_75_P01118293		3	155203	4	0.00013404	1.08667	0.983267
A_75_P01118340		3	155689	4	0.00013404	1.08667	0.983267
A_75_P01118413		3	156421	4	0.00013404	1.08667	0.983267
A_75_P01118476		3	157049	4	0.00013404	1.08667	0.983267
A_75_P01118553		3	157799	4	0.00013404	1.08667	0.983267
A_75_P01118627		3	158518	4	0.00013404	1.08667	0.983267
A_75_P01118713		3	159393	4	0.00013404	1.08667	0.983267
A_75_P01118790		3	160179	4	0.00013404	1.08667	0.983267
A_75_P01118854		3	160856	4	0.00013404	1.08667	0.983267
A_75_P01118940		3	161748	4	0.00013404	1.08667	0.983267
A_75_P01119030		3	162624	4	0.00013404	1.08667	0.983267
A_75_P01119115		3	163425	4	0.00013404	1.08667	0.983267
A_75_P01119238		3	164722	4	0.00013404	1.08667	0.983267
A_75_P01119265		3	164984	4	0.00013404	1.08667	0.983267
A_75_P01119321		3	165572	4	0.00013404	1.08667	0.983267
A_75_P01119390		3	166299	4	0.00013404	1.08667	0.983267
A_75_P01119503		3	167446	4	0.00013404	1.08667	0.983267
A_75_P01119580		3	168195	4	0.00013404	1.08667	0.983267
A_75_P01119654		3	168899	4	0.00013404	1.08667	0.983267
A_75_P01119754		3	169881	3	0.00643189	0	0.983267
A_75_P01119820		3	170552	3	0.00643189	0	0.983267
A_75_P01119907		3	171396	3	0.00643189	0	0.983267
A_75_P01119981		3	172136	2	0.173737	0	0.983267
A_75_P01120070		3	173007	1	1.10598	0	0.983267
A_75_P01120137		3	173691	1	1.10598	0	0.983267
A_75_P01120245		3	174790	0	1	0	0
A_75_P01120264		3	174994	0	1	0	0
A_75_P01120332		3	175642	0	1	0	0
A_75_P01120411		3	176424	0	1	0	0
A_75_P01120500		3	177284	0	1	0	0
A_75_P01120570		3	178005	0	1	0	0
A_75_P01120660		3	178907	0	1	0	0
A_75_P01120746		3	179713	0	1	0	0
A_75_P01120829		3	180601	0	1	0	0
A_75_P01120932		3	181586	0	1	0	0
A_75_P01121020		3	182478	0	1	0	0
A_75_P01121120		3	183445	0	1	0	0
A_75_P01121218		3	184430	0	1	0	0
A_75_P01121284		3	185128	0	1	0	0
A_75_P01121307		3	185354	0	1	0	0
A_75_P01121347		3	185761	0	1	0	0
A_75_P01121414		3	186411	0	1	0	0
A_75_P01121481		3	187102	0	1	0	0
A_75_P01121570		3	187956	0	1	0	0
A_75_P01121657		3	188834	0	1	0	0
A_75_P01121768		3	189876	0	1	0	0
A_75_P01121831		3	190550	0	1	0	0
A_75_P01121936		3	191581	0	1	0	0
A_75_P01122022		3	192488	0	1	0	0
A_75_P01122083		3	193118	0	1	0	0
A_75_P01122184		3	194189	0	1	0	0
A_75_P01122274		3	195075	0	1	0	0
A_75_P01122326		3	195603	0	1	0	0
A_75_P01122378		3	196120	0	1	0	0
A_75_P01122463		3	197046	0	1	0	0
A_75_P01122537		3	197850	0	1	0	0
A_75_P01122615		3	198635	0	1	0	0
A_75_P01122896		3	201595	0	1	0	0
A_75_P01122987		3	202553	0	1	0	0
A_75_P01123055		3	203297	0	1	0	0
A_75_P01123116		3	203920	0	1	0	0
A_75_P01123183		3	204589	0	1	0	0
A_75_P01123268		3	205413	0	1	0	0
A_75_P01123330		3	206006	0	1	0	0
A_75_P01123399		3	206671	0	1	0	0
A_75_P01123432		3	206992	0	1	0	0
A_75_P01123488		3	207565	0	1	0	0
A_75_P01123579		3	208401	0	1	0	0
A_75_P01123640		3	209095	0	1	0	0
A_75_P01123722		3	209945	0	1	0	0
A_75_P01123798		3	210758	0	1	0	0
A_75_P01123852		3	211374	0	1	0	0
A_75_P01123948		3	212459	0	1	0	0
A_75_P01124047		3	213501	0	1	0	0
A_75_P01124114		3	214214	0	1	0	0
A_75_P01124194		3	215085	0	1	0	0
A_75_P01124285		3	216025	0	1	0	0
A_75_P01124456		3	217707	0	1	0	0
A_75_P01124503		3	218158	0	1	0	0
A_75_P01124565		3	218738	0	1	0	0
A_75_P01124651		3	219570	0	1	0	0
A_75_P01124719		3	220274	0	1	0	0
A_75_P01124823		3	221332	0	1	0	0
A_75_P01124926		3	222452	0	1	0	0
A_75_P01125016		3	223367	0	1	0	0
A_75_P01125104		3	224298	0	1	0	0
A_75_P01125172		3	225021	0	1	0	0
A_75_P01125246		3	225789	0	1	0	0
A_75_P01125342		3	226789	0	1	0	0
A_75_P01125418		3	227616	0	1	0	0
A_75_P01125441		3	227846	0	1	0	0
A_75_P01125480		3	228219	0	1	0	0
A_75_P01125555		3	228977	0	1	0	0
A_75_P01125616		3	229626	0	1	0	0
A_75_P01125720		3	230689	0	1	0	0
A_75_P01125777		3	231315	0	1	0	0
A_75_P01125859		3	232151	0	1	0	0
A_75_P01125972		3	233253	0	1	0	0
A_75_P01126043		3	233983	0	1	0	0
A_75_P01126103		3	234625	0	1	0	0
A_75_P01126202		3	235603	0	1	0	0
A_75_P01126267		3	236277	0	1	0	0
A_75_P01126345		3	237052	0	1	0	0
A_75_P01126367		3	237271	0	1	0	0
A_75_P01126449		3	238095	0	1	0	0
A_75_P01126510		3	238747	0	1	0	0
A_75_P01126597		3	239622	0	1	0	0
A_75_P01126669		3	240337	0	1	0	0
A_75_P01126786		3	241549	0	1	0	0
A_75_P01126851		3	242205	0	1	0	0
A_75_P01126942		3	243156	0	1	0	0
A_75_P01127025		3	244003	0	1	0	0
A_75_P01127094		3	244715	0	1	0	0
A_75_P01127180		3	245611	0	1	0	0
A_75_P01127259		3	246447	0	1	0	0
A_75_P01127344		3	247342	0	1	0	0
A_75_P01127376		3	247663	0	1	0	0
A_75_P01127421		3	248137	0	1	0	0
A_75_P01127481		3	248728	0	1	0	0
A_75_P01127550		3	249421	0	1	0	0
A_75_P01127602		3	249998	0	1	0	0
A_75_P01127678		3	250707	0	1	0	0
A_75_P01127776		3	251738	0	1	0	0
A_75_P01127851		3	252460	0	1	0	0
A_75_P01127922		3	253214	0	1	0	0
A_75_P01127975		3	253765	0	1	0	0
A_75_P01128048		3	254558	0	1	0	0
A_75_P01128140		3	255503	0	1	0	0
A_75_P01128223		3	256311	0	1	0	0
A_75_P01128242		3	256503	0	1	0	0
A_75_P01128275		3	256830	0	1	0	0
A_75_P01128351		3	257590	0	1	0	0
A_75_P01128450		3	258557	0	1	0	0
A_75_P01128514		3	259222	0	1	0	0
A_75_P01128584		3	259898	0	1	0	0
A_75_P01128658		3	260668	0	1	0	0
A_75_P01128732		3	261406	0	1	0	0
A_75_P01128822		3	262308	0	1	0	0
A_75_P01128895		3	262989	0	1	0	0
A_75_P01128972		3	263818	0	1	0	0
A_75_P01129052		3	264708	0	1	0	0
A_75_P01129115		3	265361	0	1	0	0
A_75_P01129135		3	265610	0	1	0	0
A_75_P01129189		3	266172	0	1	0	0
A_75_P01129259		3	266880	0	1	0	0
A_75_P01129359		3	267828	0	1	0	0
A_75_P01129461		3	268875	0	1	0	0
A_75_P01129554		3	269854	0	1	0	0
A_75_P01129653		3	270847	0	1	0	0
A_75_P01129718		3	271527	0	1	0	0
A_75_P01129786		3	272188	0	1	0	0
A_75_P01129863		3	273028	0	1	0	0
A_75_P01129940		3	273753	0	1	0	0
A_75_P01130000		3	274330	0	1	0	0
A_75_P01130062		3	274964	0	1	0	0
A_75_P01130076		3	275135	0	1	0	0
A_75_P01130114		3	275526	0	1	0	0
A_75_P01130196		3	276336	0	1	0	0
A_75_P01130300		3	277366	0	1	0	0
A_75_P01130378		3	278134	0	1	0	0
A_75_P01130454		3	278895	0	1	0	0
A_75_P01130559		3	279889	0	1	0	0
A_75_P01130622		3	280506	0	1	0	0
A_75_P01130713		3	281408	0	1	0	0
A_75_P01130800		3	282223	0	1	0	0
A_75_P01130883		3	283059	0	1	0	0
A_75_P01130963		3	283802	0	1	0	0
A_75_P01131053		3	284737	0	1	0	0
A_75_P01131077		3	284949	0	1	0	0
A_75_P01131109		3	285271	0	1	0	0
A_75_P01131188		3	286057	0	1	0	0
A_75_P01131254		3	286732	0	1	0	0
A_75_P01131351		3	287696	0	1	0	0
A_75_P01131434		3	288557	0	1	0	0
A_75_P01131528		3	289495	0	1	0	0
A_75_P01131618		3	290420	0	1	0	0
A_75_P01131694		3	291221	0	1	0	0
A_75_P01131796		3	292244	0	1	0	0
A_75_P01131870		3	292992	0	1	0	0
A_75_P01131981		3	294177	0	1	0	0
A_75_P01132071		3	295089	0	1	0	0
A_75_P01132104		3	295391	0	1	0	0
A_75_P01132154		3	295892	0	1	0	0
A_75_P01132265		3	297000	0	1	0	0
A_75_P01132335		3	297649	0	1	0	0
A_75_P01132407		3	298383	0	1	0	0
A_75_P01132465		3	298988	0	1	0	0
A_75_P01132528		3	299637	0	1	0	0
A_75_P01132626		3	300659	0	1	0	0
A_75_P01132686		3	301317	0	1	0	0
A_75_P01132753		3	302030	0	1	0	0
A_75_P01132839		3	302842	0	1	0	0
A_75_P01132945		3	303900	0	1	0	0
A_75_P01133031		3	304795	0	1	0	0
A_75_P01133171		3	306266	0	1	0	0
A_75_P01133251		3	307066	0	1	0	0
A_75_P01133497		3	309480	0	1	0	0
A_75_P01133601		3	310548	0	1	0	0
A_75_P01133745		3	311951	0	1	0	0
A_75_P01133819		3	312708	0	1	0	0
A_75_P01133879		3	313322	0	1	0	0
A_75_P01133934		3	313934	0	1	0	0
A_75_P01134023		3	314866	0	1	0	0
A_75_P01134403		4	2228	0	1	0	0
A_75_P01135939		4	17868	0	1	0	0
A_75_P01136059		4	19088	0	1	0	0
A_75_P01136087		4	19376	0	1	0	0
A_75_P01136128		4	19782	0	1	0	0
A_75_P01136218		4	20674	0	1	0	0
A_75_P01136290		4	21444	0	1	0	0
A_75_P01136389		4	22446	0	1	0	0
A_75_P01136474		4	23309	0	1	0	0
A_75_P01136525		4	23847	0	1	0	0
A_75_P01136593		4	24502	0	1	0	0
A_75_P01136680		4	25328	0	1	0	0
A_75_P01136777		4	26391	0	1	0	0
A_75_P01136871		4	27343	0	1	0	0
A_75_P01136967		4	28291	0	1	0	0
A_75_P01137042		4	29035	0	1	0	0
A_75_P01137069		4	29307	0	1	0	0
A_75_P01137120		4	29840	0	1	0	0
A_75_P01137189		4	30518	0	1	0	0
A_75_P01137293		4	31590	0	1	0	0
A_75_P01137386		4	32521	0	1	0	0
A_75_P01137478		4	33464	0	1	0	0
A_75_P01137558		4	34245	0	1	0	0
A_75_P01137620		4	34817	0	1	0	0
A_75_P01137724		4	35889	0	1	0	0
A_75_P01137798		4	36640	0	1	0	0
A_75_P01137864		4	37290	0	1	0	0
A_75_P01137954		4	38190	0	1	0	0
A_75_P01138023		4	38857	0	1	0	0
A_75_P01138046		4	39086	0	1	0	0
A_75_P01138087		4	39489	0	1	0	0
A_75_P01138142		4	40056	0	1	0	0
A_75_P01138217		4	40831	0	1	0	0
A_75_P01138308		4	41836	0	1	0	0
A_75_P01138382		4	42644	0	1	0	0
A_75_P01138438		4	43245	0	1	0	0
A_75_P01138524		4	44172	0	1	0	0
A_75_P01138703		4	46033	0	1	0	0
A_75_P01138800		4	47059	0	1	0	0
A_75_P01138861		4	47684	0	1	0	0
A_75_P01138940		4	48477	0	1	0	0
A_75_P01139017		4	49208	0	1	0	0
A_75_P01139042		4	49454	0	1	0	0
A_75_P01139091		4	49957	0	1	0	0
A_75_P01139174		4	50789	0	1	0	0
A_75_P01139236		4	51430	0	1	0	0
A_75_P01139290		4	51953	0	1	0	0
A_75_P01139364		4	52691	0	1	0	0
A_75_P01139446		4	53510	0	1	0	0
A_75_P01139536		4	54400	0	1	0	0
A_75_P01139633		4	55376	0	1	0	0
A_75_P01139712		4	56109	0	1	0	0
A_75_P01139817		4	57126	1	1.10598	-0.734	0
A_75_P01139903		4	58046	1	1.10598	-0.734	0
A_75_P01139977		4	58776	0	1	0	0
A_75_P01140009		4	59102	0	1	0	0
A_75_P01140069		4	59725	0	1	0	0
A_75_P01140165		4	60743	0	1	0	0
A_75_P01140240		4	61501	0	1	0	0
A_75_P01140302		4	62121	0	1	0	0
A_75_P01140391		4	63000	0	1	0	0
A_75_P01140474		4	63860	0	1	0	0
A_75_P01140542		4	64519	0	1	0	0
A_75_P01140620		4	65259	0	1	0	0
A_75_P01140703		4	66102	0	1	0	0
A_75_P01140786		4	66952	0	1	0	0
A_75_P01140864		4	67799	0	1	0	0
A_75_P01140947		4	68628	0	1	0	0
A_75_P01140963		4	68801	0	1	0	0
A_75_P01141010		4	69275	0	1	0	0
A_75_P01141102		4	70214	0	1	0	0
A_75_P01141179		4	70988	0	1	0	0
A_75_P01141252		4	71714	0	1	0	0
A_75_P01141321		4	72407	0	1	0	0
A_75_P01141426		4	73482	0	1	0	0
A_75_P01141512		4	74354	0	1	0	0
A_75_P01141590		4	75152	0	1	0	0
A_75_P01141659		4	75861	0	1	0	0
A_75_P01141761		4	76890	0	1	0	0
A_75_P01141841		4	77712	0	1	0	0
A_75_P01141914		4	78415	0	1	0	0
A_75_P01141961		4	78887	0	1	0	0
A_75_P01142021		4	79453	0	1	0	0
A_75_P01142085		4	80100	0	1	0	0
A_75_P01142188		4	81140	0	1	0	0
A_75_P01142281		4	82095	0	1	0	0
A_75_P01142373		4	83001	0	1	0	0
A_75_P01142456		4	83803	0	1	0	0
A_75_P01142544		4	84675	0	1	0	0
A_75_P01142609		4	85353	0	1	0	0
A_75_P01142697		4	86239	0	1	0	0
A_75_P01142760		4	86853	0	1	0	0
A_75_P01142861		4	87860	0	1	0	0
A_75_P01142933		4	88614	0	1	0	0
A_75_P01142965		4	88921	0	1	0	0
A_75_P01143021		4	89516	0	1	0	0
A_75_P01143104		4	90330	0	1	0	0
A_75_P01143185		4	91139	0	1	0	0
A_75_P01143264		4	91955	0	1	0	0
A_75_P01143331		4	92592	0	1	0	0
A_75_P01143438		4	93676	0	1	0	0
A_75_P01143551		4	94780	0	1	0	0
A_75_P01143635		4	95606	0	1	0	0
A_75_P01143715		4	96423	0	1	0	0
A_75_P01143786		4	97135	0	1	0	0
A_75_P01143867		4	97949	0	1	0	0
A_75_P01143925		4	98526	0	1	0	0
A_75_P01143944		4	98696	0	1	0	0
A_75_P01143987		4	99147	0	1	0	0
A_75_P01144050		4	99790	0	1	0	0
A_75_P01144128		4	100558	0	1	0	0
A_75_P01144211		4	101397	0	1	0	0
A_75_P01144372		4	102999	0	1	0	0
A_75_P01144476		4	104068	0	1	0	0
A_75_P01144539		4	104698	0	1	0	0
A_75_P01144604		4	105421	0	1	0	0
A_75_P01144678		4	106188	0	1	0	0
A_75_P01144747		4	106852	0	1	0	0
A_75_P01144851		4	107944	0	1	0	0
A_75_P01144869		4	108178	0	1	0	0
A_75_P01144905		4	108527	0	1	0	0
A_75_P01144998		4	109538	0	1	0	0
A_75_P01145045		4	110040	0	1	0	0
A_75_P01145118		4	110834	0	1	0	0
A_75_P01145208		4	111795	0	1	0	0
A_75_P01145272		4	112437	0	1	0	0
A_75_P01145337		4	113080	0	1	0	0
A_75_P01145419		4	113920	0	1	0	0
A_75_P01145474		4	114461	0	1	0	0
A_75_P01145536		4	115072	0	1	0	0
A_75_P01145628		4	115976	0	1	0	0
A_75_P01145713		4	116807	0	1	0	0
A_75_P01145739		4	117095	0	1	0	0
A_75_P01145789		4	117592	0	1	0	0
A_75_P01145875		4	118524	0	1	0	0
A_75_P01145981		4	119537	0	1	0	0
A_75_P01146072		4	120449	0	1	0	0
A_75_P01146162		4	121303	0	1	0	0
A_75_P01146248		4	122167	0	1	0	0
A_75_P01146327		4	122902	0	1	0	0
A_75_P01146413		4	123800	0	1	0	0
A_75_P01146528		4	124976	0	1	0	0
A_75_P01146607		4	125741	0	1	0	0
A_75_P01146659		4	126274	0	1	0	0
A_75_P01146789		4	127574	0	1	0	0
A_75_P01146820		4	127906	0	1	0	0
A_75_P01146883		4	128563	0	1	0	0
A_75_P01146953		4	129310	0	1	0	0
A_75_P01147034		4	130104	0	1	0	0
A_75_P01147092		4	130727	0	1	0	0
A_75_P01147170		4	131512	0	1	0	0
A_75_P01147230		4	132108	0	1	0	0
A_75_P01147296		4	132742	0	1	0	0
A_75_P01147394		4	133690	0	1	0	0
A_75_P01147533		4	135137	0	1	0	0
A_75_P01147593		4	135765	0	1	0	0
A_75_P01147669		4	136556	0	1	0	0
A_75_P01147758		4	137471	0	1	0	0
A_75_P01147781		4	137708	0	1	0	0
A_75_P01147837		4	138287	0	1	0	0
A_75_P01147910		4	139019	0	1	0	0
A_75_P01147962		4	139615	0	1	0	0
A_75_P01148021		4	140229	0	1	0	0
A_75_P01148124		4	141295	0	1	0	0
A_75_P01148212		4	142153	0	1	0	0
A_75_P01148289		4	142946	0	1	0	0
A_75_P01148380		4	143849	0	1	0	0
A_75_P01148448		4	144572	0	1	0	0
A_75_P01148540		4	145534	0	1	0	0
A_75_P01148602		4	146127	0	1	0	0
A_75_P01148725		4	147375	0	1	0	0
A_75_P01148749		4	147611	0	1	0	0
A_75_P01148829		4	148457	0	1	0	0
A_75_P01148923		4	149493	0	1	0	0
A_75_P01149025		4	150536	0	1	0	0
A_75_P01149089		4	151163	0	1	0	0
A_75_P01149150		4	151802	0	1	0	0
A_75_P01149229		4	152589	0	1	0	0
A_75_P01149329		4	153660	0	1	0	0
A_75_P01149412		4	154509	0	1	0	0
A_75_P01149524		4	155570	0	1	0	0
A_75_P01149576		4	156125	0	1	0	0
A_75_P01149664		4	156964	0	1	0	0
A_75_P01149758		4	157872	0	1	0	0
A_75_P01149804		4	158353	0	1	0	0
A_75_P01149840		4	158694	0	1	0	0
A_75_P01149895		4	159284	0	1	0	0
A_75_P01149955		4	159284	0	1	0	0
A_75_P01150045		4	160818	0	1	0	0
A_75_P01150137		4	161703	0	1	0	0
A_75_P01150230		4	162650	0	1	0	0
A_75_P01150324		4	163670	0	1	0	0
A_75_P01150419		4	164603	0	1	0	0
A_75_P01150512		4	165538	0	1	0	0
A_75_P01150575		4	166181	0	1	0	0
A_75_P01150636		4	166769	0	1	0	0
A_75_P01150714		4	167572	0	1	0	0
A_75_P01150744		4	167845	0	1	0	0
A_75_P01150795		4	168379	0	1	0	0
A_75_P01150899		4	169363	0	1	0	0
A_75_P01150965		4	170049	0	1	0	0
A_75_P01151049		4	170913	0	1	0	0
A_75_P01151137		4	171788	0	1	0	0
A_75_P01151278		4	173136	0	1	0	0
A_75_P01151345		4	173752	0	1	0	0
A_75_P01151404		4	174363	0	1	0	0
A_75_P01151488		4	175151	0	1	0	0
A_75_P01151551		4	175794	0	1	0	0
A_75_P01151613		4	176438	0	1	0	0
A_75_P01151710		4	177457	0	1	0	0
A_75_P01151735		4	177694	0	1	0	0
A_75_P01151819		4	178593	0	1	0	0
A_75_P01151886		4	179250	0	1	0	0
A_75_P01151936		4	179775	0	1	0	0
A_75_P01152014		4	180539	0	1	0	0
A_75_P01152114		4	181500	0	1	0	0
A_75_P01152181		4	182206	0	1	0	0
A_75_P01152232		4	182702	0	1	0	0
A_75_P01152308		4	183480	0	1	0	0
A_75_P01152408		4	184436	0	1	0	0
A_75_P01152488		4	185255	0	1	0	0
A_75_P01152562		4	185930	0	1	0	0
A_75_P01152642		4	186714	0	1	0	0
A_75_P01152675		4	187026	0	1	0	0
A_75_P01152724		4	187484	0	1	0	0
A_75_P01152802		4	188264	0	1	0	0
A_75_P01152903		4	189287	0	1	0	0
A_75_P01152972		4	190006	0	1	0	0
A_75_P01153058		4	190883	0	1	0	0
A_75_P01153137		4	191696	0	1	0	0
A_75_P01153203		4	192381	0	1	0	0
A_75_P01153335		4	193751	0	1	0	0
A_75_P01153413		4	194501	0	1	0	0
A_75_P01153471		4	195080	0	1	0	0
A_75_P01153529		4	195681	0	1	0	0
A_75_P01153552		4	195910	0	1	0	0
A_75_P01153595		4	196360	0	1	0	0
A_75_P01153689		4	197268	0	1	0	0
A_75_P01153749		4	197870	0	1	0	0
A_75_P01153833		4	198717	0	1	0	0
A_75_P01153905		4	199460	0	1	0	0
A_75_P01154005		4	200517	0	1	0	0
A_75_P01154074		4	201176	0	1	0	0
A_75_P01154183		4	202269	0	1	0	0
A_75_P01154269		4	203135	0	1	0	0
A_75_P01154373		4	204240	0	1	0	0
A_75_P01154466		4	205183	0	1	0	0
A_75_P01154562		4	206177	0	1	0	0
A_75_P01154579		4	206356	0	1	0	0
A_75_P01154649		4	207106	0	1	0	0
A_75_P01154742		4	208009	0	1	0	0
A_75_P01154835		4	208949	0	1	0	0
A_75_P01154909		4	209696	0	1	0	0
A_75_P01154991		4	210534	0	1	0	0
A_75_P01155096		4	211629	0	1	0	0
A_75_P01155170		4	212363	0	1	0	0
A_75_P01155256		4	213259	0	1	0	0
A_75_P01155339		4	214126	0	1	0	0
A_75_P01155438		4	215085	0	1	0	0
A_75_P01155511		4	215788	0	1	0	0
A_75_P01155582		4	216499	0	1	0	0
A_75_P01155615		4	216841	0	1	0	0
A_75_P01155655		4	217251	0	1	0	0
A_75_P01155715		4	217854	0	1	0	0
A_75_P01155837		4	219052	0	1	0	0
A_75_P01155906		4	219740	0	1	0	0
A_75_P01155999		4	220670	0	1	0	0
A_75_P01156076		4	221468	0	1	0	0
A_75_P01156136		4	222087	0	1	0	0
A_75_P01156222		4	222944	0	1	0	0
A_75_P01156311		4	223819	0	1	0	0
A_75_P01156371		4	224406	0	1	0	0
A_75_P01156447		4	225229	0	1	0	0
A_75_P01156502		4	225762	0	1	0	0
A_75_P01156528		4	226032	0	1	0	0
A_75_P01156562		4	226366	0	1	0	0
A_75_P01156639		4	227152	0	1	0	0
A_75_P01156771		4	228460	0	1	0	0
A_75_P01156845		4	229204	0	1	0	0
A_75_P01156902		4	229767	0	1	0	0
A_75_P01157004		4	230821	0	1	0	0
A_75_P01157068		4	231471	0	1	0	0
A_75_P01157152		4	232319	0	1	0	0
A_75_P01157244		4	233252	0	1	0	0
A_75_P01157325		4	234063	0	1	0	0
A_75_P01157452		4	235371	0	1	0	0
A_75_P01157553		4	236283	0	1	0	0
A_75_P01157589		4	236613	0	1	0	0
A_75_P01157623		4	236945	0	1	0	0
A_75_P01157696		4	237658	0	1	0	0
A_75_P01157770		4	238404	0	1	0	0
A_75_P01157847		4	239167	0	1	0	0
A_75_P01157912		4	239810	0	1	0	0
A_75_P01157981		4	240500	0	1	0	0
A_75_P01158038		4	241126	0	1	0	0
A_75_P01158106		4	241823	0	1	0	0
A_75_P01158190		4	242704	0	1	0	0
A_75_P01158268		4	243498	0	1	0	0
A_75_P01158383		4	244596	0	1	0	0
A_75_P01158465		4	245398	0	1	0	0
A_75_P01158482		4	245559	0	1	0	0
A_75_P01158539		4	246133	0	1	0	0
A_75_P01158631		4	247073	0	1	0	0
A_75_P01158684		4	247652	0	1	0	0
A_75_P01158768		4	248467	0	1	0	0
A_75_P01158852		4	249311	0	1	0	0
A_75_P01158919		4	250013	0	1	0	0
A_75_P01159042		4	251261	0	1	0	0
A_75_P01159121		4	252024	0	1	0	0
A_75_P01159198		4	252778	0	1	0	0
A_75_P01159324		4	254060	0	1	0	0
A_75_P01159434		4	255114	0	1	0	0
A_75_P01159559		4	256382	0	1	0	0
A_75_P01159584		4	256612	0	1	0	0
A_75_P01159630		4	257074	0	1	0	0
A_75_P01159737		4	258159	0	1	0	0
A_75_P01159804		4	258834	0	1	0	0
A_75_P01159885		4	259641	0	1	0	0
A_75_P01159985		4	260637	0	1	0	0
A_75_P01160048		4	261256	0	1	0	0
A_75_P01160117		4	261981	0	1	0	0
A_75_P01160194		4	262745	0	1	0	0
A_75_P01160255		4	263410	0	1	0	0
A_75_P01160334		4	264164	0	1	0	0
A_75_P01160434		4	265149	0	1	0	0
A_75_P01160525		4	266119	0	1	0	0
[truncated: 13,167 more rows]

## Sheet: 27547_CLACAverageSmooth
Gene/Clone ID	Gene/Clone Name	Chromosome Number	Nucleotide Position	Consensus Count	Consensus FDR	1a wt #1 vs PSL2	1a wt #2 vs PSL2
A_75_P01000003		1	48	0	1	-0.173333	-0.246667
A_75_P01000148		1	1516	0	1	-0.0475	-0.1875
A_75_P01000289		1	2997	0	1	0.08	-0.146
A_75_P01000360		1	3736	0	1	0.026	-0.07
A_75_P01000410		1	4229	0	1	0.002	-0.11
A_75_P01000473		1	4857	0	1	0.166	0.032
A_75_P01000549		1	5626	0	1	0.108	0.116
A_75_P01000600		1	6146	0	1	-0.008	0.116
A_75_P01000684		1	6973	0	1	-0.05	0.032
A_75_P01000762		1	7748	0	1	-0.052	0.01
A_75_P01000835		1	8471	0	1	0.11	0.028
A_75_P01000898		1	9065	0	1	-0.208	-0.294
A_75_P01000951		1	9582	0	1	-0.378	-0.352
A_75_P01000967		1	9737	0	1	-0.488	-0.358
A_75_P01001017		1	10241	0	1	-0.678	-0.426
A_75_P01001106		1	11079	0	1	-0.738	-0.49
A_75_P01001161		1	11599	0	1	-0.642	-0.332
A_75_P01001343		1	13480	0	1	-0.618	-0.41
A_75_P01001457		1	14632	0	1	-0.542	-0.438
A_75_P01001643		1	16454	0	1	-0.66	-0.578
A_75_P01001747		1	17518	0	1	-0.682	-0.562
A_75_P01001967		1	19765	0	1	-0.534	-0.49
A_75_P01002230		1	22516	0	1	-0.42	-0.278
A_75_P01002684		1	27166	0	1	-0.53	-0.228
A_75_P01002757		1	27935	0	1	-0.35	-0.018
A_75_P01002834		1	28686	0	1	-0.348	0.028
A_75_P01002852		1	28855	0	1	-0.192	0.04
A_75_P01002903		1	29351	0	1	-0.344	-0.06
A_75_P01002980		1	30166	0	1	-0.14	0.026
A_75_P01003050		1	30873	0	1	-0.252	0.012
A_75_P01003094		1	31327	0	1	-0.114	0.094
A_75_P01003172		1	32163	0	1	-0.068	0.126
A_75_P01003241		1	32929	0	1	0.084	0.084
A_75_P01003291		1	33457	0	1	0.112	0.038
A_75_P01003372		1	34340	0	1	0.306	0.106
A_75_P01003435		1	34992	0	1	-0.216	-0.216
A_75_P01003488		1	35595	0	1	-0.508	-0.252
A_75_P01003548		1	36219	1	1.10598	-0.71	-0.406
A_75_P01003648		1	37207	1	1.10598	-0.816	-0.342
A_75_P01003669		1	37408	1	1.10598	-0.74	-0.426
A_75_P01003714		1	37857	0	1	-0.42	-0.16
A_75_P01003776		1	38497	0	1	-0.276	-0.13
A_75_P01003833		1	39096	0	1	-0.026	0.1
A_75_P01003908		1	39844	0	1	-0.236	-0.096
A_75_P01003958		1	40358	0	1	-0.254	-0.05
A_75_P01004042		1	41229	0	1	-0.282	-0.15
A_75_P01004134		1	42180	0	1	-0.282	-0.11
A_75_P01004182		1	42678	0	1	-0.292	-0.216
A_75_P01004232		1	43205	0	1	-0.028	-0.064
A_75_P01004303		1	43934	0	1	-0.078	-0.062
A_75_P01004374		1	44697	0	1	0.138	0.08
A_75_P01004422		1	45244	0	1	0.186	-0.002
A_75_P01004446		1	45500	0	1	0.256	0.118
A_75_P01004507		1	46151	0	1	0.126	0.022
A_75_P01004559		1	46773	0	1	0.1	-0.018
A_75_P01004639		1	47567	0	1	0.036	-0.076
A_75_P01004694		1	48146	0	1	-0.196	-0.082
A_75_P01004751		1	48710	0	1	-0.232	0.03
A_75_P01004826		1	49446	0	1	-0.164	0.022
A_75_P01004925		1	50476	0	1	-0.19	0.044
A_75_P01004994		1	51176	0	1	-0.256	0.068
A_75_P01005043		1	51691	0	1	0.06	0.126
A_75_P01005106		1	52376	0	1	0.038	-0.036
A_75_P01005194		1	53254	0	1	-0.132	-0.056
A_75_P01005256		1	53873	0	1	-0.062	-0.036
A_75_P01005273		1	54057	0	1	-0.154	-0.09
A_75_P01005307		1	54427	0	1	-0.456	-0.078
A_75_P01005387		1	55267	0	1	-0.466	-0.018
A_75_P01005482		1	56231	0	1	-0.2	0.118
A_75_P01005558		1	56986	0	1	-0.264	0.18
A_75_P01005623		1	57667	0	1	-0.138	0.228
A_75_P01005701		1	58458	0	1	-0.116	0.028
A_75_P01005779		1	59254	0	1	-0.18	-0.064
A_75_P01005867		1	60185	0	1	-0.198	-0.112
A_75_P01005908		1	60674	0	1	-0.1975	-0.386
A_75_P01005989		1	61510	0	1	-0.2175	-0.448
A_75_P01006058		1	62223	0	1	-0.2175	-0.404
A_75_P01006106		1	62719	0	1	-0.0775	-0.352
A_75_P01006136		1	62995	0	1	-0.225	-0.406
A_75_P01006194		1	63564	0	1	-0.24	-0.128
A_75_P01006253		1	64205	0	1	-0.328	-0.158
A_75_P01006312		1	64813	0	1	-0.158	-0.064
A_75_P01006370		1	65447	0	1	-0.238	0.06
A_75_P01006455		1	66305	0	1	-0.128	0.13
A_75_P01006520		1	66901	0	1	0.034	0.072
A_75_P01006590		1	67605	0	1	0.164	0.104
A_75_P01006657		1	68291	0	1	0.194	0.11
A_75_P01006713		1	68863	0	1	0.168	-0.074
A_75_P01006754		1	69346	0	1	0.124	-0.024
A_75_P01006814		1	69987	0	1	-0.076	-0.038
A_75_P01006869		1	70564	0	1	-0.152	-0.072
A_75_P01006887		1	70747	0	1	-0.206	-0.06
A_75_P01006941		1	71286	0	1	-0.358	-0.156
A_75_P01006992		1	71774	0	1	-0.592	-0.202
A_75_P01007061		1	72479	0	1	-0.458	-0.146
A_75_P01007136		1	73253	0	1	-0.532	-0.258
A_75_P01007193		1	73812	0	1	-0.446	-0.178
A_75_P01007246		1	74322	0	1	-0.43	-0.182
A_75_P01007303		1	74931	0	1	-0.192	-0.242
A_75_P01007380		1	75677	0	1	-0.316	-0.348
A_75_P01007453		1	76420	0	1	-0.26	-0.164
A_75_P01007517		1	77036	0	1	-0.31	-0.266
A_75_P01007598		1	77886	0	1	-0.082	-0.056
A_75_P01007681		1	78725	0	1	-0.046	0.03
A_75_P01007705		1	78983	0	1	-0.198	-0.058
A_75_P01007739		1	79338	0	1	-0.126	-0.028
A_75_P01007826		1	80173	0	1	-0.304	-0.088
A_75_P01007896		1	80866	0	1	-0.426	-0.162
A_75_P01007975		1	81714	0	1	-0.668	-0.352
A_75_P01008053		1	82551	0	1	-0.526	-0.218
A_75_P01008107		1	83113	0	1	-0.512	-0.282
A_75_P01008163		1	83738	0	1	-0.34	-0.192
A_75_P01008264		1	84738	0	1	-0.166	-0.2
A_75_P01008324		1	85383	0	1	-0.108	-0.252
A_75_P01008405		1	86188	0	1	-0.034	-0.234
A_75_P01008487		1	87046	0	1	-0.14	-0.278
A_75_P01008548		1	87671	0	1	-0.098	-0.182
A_75_P01008580		1	87976	0	1	-0.116	-0.132
A_75_P01008616		1	88334	0	1	-0.016	0.07
A_75_P01008737		1	89566	0	1	-0.07	-0.07
A_75_P01008821		1	90379	0	1	-0.08	-0.108
A_75_P01008902		1	91203	0	1	-0.116	-0.096
A_75_P01008977		1	91958	0	1	-0.24	-0.136
A_75_P01009040		1	92630	0	1	-0.154	-0.128
A_75_P01009120		1	93423	0	1	-0.076	-0.076
A_75_P01009207		1	94357	0	1	0.028	0.038
A_75_P01009287		1	95127	0	1	-0.118	-0.078
A_75_P01009385		1	96055	0	1	-0.072	-0.014
A_75_P01009463		1	96844	0	1	-0.078	0.056
A_75_P01009497		1	97199	0	1	-0.172	0.074
A_75_P01009557		1	97746	0	1	-0.094	0.112
A_75_P01009643		1	98627	0	1	-0.048	0.054
A_75_P01009709		1	99313	0	1	0	0.074
A_75_P01009766		1	99880	0	1	-0.042	-0.006
A_75_P01009850		1	100758	0	1	-0.004	-0.042
A_75_P01009938		1	101656	0	1	-0.106	-0.096
A_75_P01010006		1	102334	0	1	-0.026	-0.02
A_75_P01010101		1	103308	0	1	-0.054	-0.07
A_75_P01010184		1	104104	0	1	-0.012	-0.064
A_75_P01010278		1	105018	0	1	0.106	0.054
A_75_P01010336		1	105621	0	1	-0.02	0.046
A_75_P01010404		1	106309	0	1	-0.1	0.06
A_75_P01010421		1	106502	0	1	-0.134	0.028
A_75_P01010487		1	107150	0	1	-0.28	-0.088
A_75_P01010528		1	107577	0	1	-0.352	-0.09
A_75_P01010577		1	108086	0	1	-0.282	-0.134
A_75_P01010628		1	108616	0	1	-0.118	-0.06
A_75_P01010695		1	109359	0	1	0.016	-0.018
A_75_P01010777		1	110204	0	1	0.086	0.094
A_75_P01010837		1	110836	0	1	-0.232	0.092
A_75_P01010899		1	111446	0	1	-0.098	0.282
A_75_P01010953		1	112001	0	1	-0.162	0.166
A_75_P01011016		1	112637	0	1	-0.184	0.146
A_75_P01011086		1	113326	0	1	-0.18	-0.24
A_75_P01011144		1	113932	0	1	0.1375	-0.314
A_75_P01011170		1	114228	0	1	-0.0225	-0.404
A_75_P01011203		1	114597	0	1	-0.005	-0.376
A_75_P01011255		1	115197	0	1	-0.25	-0.524
A_75_P01011306		1	115733	0	1	-0.244	-0.156
A_75_P01011384		1	116505	0	1	-0.112	-0.094
A_75_P01011460		1	117274	0	1	0.014	-0.084
A_75_P01011539		1	117995	0	1	-0.024	-0.122
A_75_P01011595		1	118600	0	1	0.028	-0.034
A_75_P01011666		1	119266	0	1	0.06	0.002
A_75_P01011748		1	120059	0	1	-0.16	-0.204
A_75_P01011809		1	120671	0	1	-0.344	-0.286
A_75_P01011863		1	121242	0	1	-0.278	-0.272
A_75_P01011938		1	121957	0	1	-0.148	-0.134
A_75_P01011965		1	122237	0	1	-0.102	-0.118
A_75_P01011999		1	122586	0	1	0.114	0.064
A_75_P01012099		1	123537	0	1	0.11	-0.044
A_75_P01012160		1	124182	0	1	-0.124	-0.25
A_75_P01012229		1	124839	0	1	-0.244	-0.306
A_75_P01012314		1	125694	0	1	-0.3	-0.284
A_75_P01012393		1	126524	0	1	-0.29	-0.188
A_75_P01012490		1	127508	0	1	-0.152	-0.104
A_75_P01012556		1	128196	0	1	-0.096	0.028
A_75_P01012606		1	128709	0	1	-0.024	0.006
A_75_P01012681		1	129523	0	1	-0.0025	-0.316
A_75_P01012739		1	130157	0	1	-0.2375	-0.442
A_75_P01012796		1	130727	0	1	-0.2175	-0.348
A_75_P01012813		1	130910	0	1	-0.135	-0.362
A_75_P01012852		1	131344	0	1	-0.3325	-0.57
A_75_P01012926		1	132118	0	1	-0.59	-0.498
A_75_P01013008		1	132979	0	1	-0.462	-0.562
A_75_P01013066		1	133565	0	1	-0.466	-0.636
A_75_P01013159		1	134556	0	1	-0.41	-0.568
A_75_P01013246		1	135426	0	1	-0.262	-0.442
A_75_P01013311		1	136112	0	1	0.14	-0.228
A_75_P01013363		1	136645	0	1	0.162	-0.136
A_75_P01013415		1	137199	0	1	0.1725	-0.4
A_75_P01013483		1	137857	0	1	0.11	-0.348
A_75_P01013565		1	138668	0	1	-0.18	-0.464
A_75_P01013621		1	139288	0	1	-0.3525	-0.492
A_75_P01013634		1	139438	0	1	-0.305	-0.482
A_75_P01013705		1	140134	0	1	-0.392	-0.084
A_75_P01013842		1	141556	0	1	-0.336	-0.078
A_75_P01013926		1	142436	0	1	-0.11	0.09
A_75_P01014006		1	143256	0	1	-0.122	0.05
A_75_P01014070		1	143904	0	1	-0.234	0.03
A_75_P01014137		1	144582	0	1	-0.166	-0.252
A_75_P01014209		1	145221	0	1	-0.248	-0.234
A_75_P01014290		1	145992	0	1	-0.416	-0.248
A_75_P01014379		1	146912	0	1	-0.29	-0.112
A_75_P01014459		1	147714	0	1	-0.182	-0.096
A_75_P01014512		1	148227	0	1	-0.136	0.076
A_75_P01014602		1	149140	0	1	-0.008	0.14
A_75_P01014623		1	149317	0	1	-0.04	0.056
A_75_P01014660		1	149713	0	1	-0.062	-0.018
A_75_P01014722		1	150340	0	1	-0.088	0.038
A_75_P01014782		1	150964	0	1	-0.04	0.108
A_75_P01014837		1	151546	0	1	-0.152	-0.028
A_75_P01014916		1	152366	0	1	0.03	0.122
A_75_P01015021		1	153409	0	1	0.058	0.188
A_75_P01015100		1	154240	0	1	-0.134	0.006
A_75_P01015170		1	154956	0	1	-0.528	-0.272
A_75_P01015222		1	155481	0	1	-0.434	-0.222
A_75_P01015299		1	156232	0	1	-0.372	-0.226
A_75_P01015375		1	156971	0	1	-0.4	-0.26
A_75_P01015460		1	157766	0	1	-0.234	-0.072
A_75_P01015478		1	157944	0	1	-0.018	-0.026
A_75_P01015514		1	158325	0	1	-0.24	-0.188
A_75_P01015598		1	159128	0	1	-0.438	-0.25
A_75_P01015685		1	160004	0	1	-0.424	-0.3
A_75_P01016350		1	166406	0	1	-0.47	-0.374
A_75_P01016402		1	166934	0	1	-0.286	-0.146
A_75_P01016479		1	167710	0	1	-0.102	-0.062
A_75_P01016543		1	168332	0	1	0.026	0.04
A_75_P01016637		1	169276	0	1	-0.036	-0.044
A_75_P01016722		1	170117	0	1	0.04	0.048
A_75_P01016782		1	170716	0	1	-0.198	-0.154
A_75_P01016858		1	171474	0	1	-0.128	-0.138
A_75_P01016917		1	172079	0	1	-0.068	-0.096
A_75_P01016945		1	172342	0	1	-0.172	-0.104
A_75_P01017006		1	172912	0	1	-0.284	-0.262
A_75_P01017077		1	173619	0	1	-0.038	-0.108
A_75_P01017149		1	174351	0	1	-0.238	-0.292
A_75_P01017220		1	175099	0	1	-0.512	-0.464
A_75_P01017426		1	177113	0	1	-0.558	-0.572
A_75_P01017491		1	177719	1	1.10598	-0.605	-0.808
A_75_P01017567		1	178467	2	0.173737	-0.7225	-0.866
A_75_P01017638		1	179160	1	1.10598	-0.5675	-0.66
A_75_P01017697		1	179758	1	1.10598	-0.315	-0.618
A_75_P01017778		1	180536	0	1	-0.33	-0.536
A_75_P01017829		1	181067	0	1	-0.14	-0.154
A_75_P01017854		1	181321	0	1	-0.078	0.008
A_75_P01017893		1	181679	0	1	-0.322	-0.236
A_75_P01017968		1	182441	0	1	-0.458	-0.308
A_75_P01018077		1	183527	0	1	-0.322	-0.28
A_75_P01018147		1	184210	0	1	-0.526	-0.412
A_75_P01018250		1	185284	0	1	-0.494	-0.532
A_75_P01018311		1	185903	0	1	-0.5	-0.558
A_75_P01018388		1	186672	0	1	-0.33	-0.436
A_75_P01018460		1	187397	0	1	-0.254	-0.36
A_75_P01018544		1	188329	0	1	-0.258	-0.348
A_75_P01018714		1	190077	0	1	-0.3	-0.398
A_75_P01018781		1	190830	0	1	-0.074	-0.218
A_75_P01018848		1	191693	0	1	-0.102	-0.166
A_75_P01018861		1	191840	0	1	-0.116	-0.15
A_75_P01018894		1	192237	0	1	-0.032	-0.148
A_75_P01018950		1	192821	0	1	0.026	-0.0925
A_75_P01019042		1	193813	0	1	0.104	0.015
A_75_P01019112		1	194508	1	1.10598	0.152	-0.0175
A_75_P01019175		1	195154	1	1.10598	0.165	-0.3875
A_75_P01019260		1	196008	1	1.10598	0.2225	-0.385
A_75_P01019331		1	196754	1	1.10598	0.135	-0.36
A_75_P01019383		1	197254	2	0.173737	-0.515	-0.398
A_75_P01019459		1	198003	3	0.00643189	-0.7075	-0.64
A_75_P01019538		1	198759	5	1.99335e-06	-0.75	-0.586
A_75_P01019594		1	199310	5	1.99335e-06	-1.114	-0.786
A_75_P01019669		1	200086	5	1.99335e-06	-1.438	-0.9175
A_75_P01019693		1	200353	5	1.99335e-06	-1.3	-1.21
A_75_P01019747		1	200883	5	1.99335e-06	-1.33	-1.265
A_75_P01019791		1	201375	3	0.00643189	-1.062	-0.8975
A_75_P01019855		1	202009	3	0.00643189	-0.794	-0.6175
A_75_P01019931		1	202726	5	1.99335e-06	-0.856	-0.97
A_75_P01020000		1	203405	5	1.99335e-06	-0.714	-0.918
A_75_P01020270		1	206273	5	1.99335e-06	-0.846	-0.8475
A_75_P01020408		1	207629	8	2.66418e-13	-1.218	-1.32
A_75_P01022284		1	226845	8	2.66418e-13	-1.26	-1.3175
A_75_P01022345		1	227433	5	1.99335e-06	-0.938	-0.9125
A_75_P01022508		1	229146	4	0.00013404	-0.9375	-0.833333
A_75_P01022572		1	229802	4	0.00013404	-0.783333	-0.833333
A_75_P01023234		2	6566	0	1	0.39	0.22
A_75_P01023395		2	8282	0	1	0.3875	0.1825
A_75_P01023448		2	8802	0	1	0.236	0.144
A_75_P01023549		2	9790	0	1	0.124	0.012
A_75_P01023608		2	10392	0	1	-0.028	-0.082
A_75_P01023730		2	11589	0	1	0.082	0.088
A_75_P01023785		2	12113	0	1	-0.008	0.166
A_75_P01023877		2	13062	0	1	0.0825	0.038
A_75_P01023953		2	13820	0	1	-0.0775	-0.012
A_75_P01024026		2	14550	0	1	-0.115	-0.022
A_75_P01024089		2	15211	0	1	-0.165	-0.048
A_75_P01024155		2	15814	0	1	-0.205	-0.174
A_75_P01024232		2	16596	0	1	-0.16	0.012
A_75_P01024322		2	17503	0	1	-0.2	-0.018
A_75_P01024341		2	17687	0	1	-0.15	0.028
A_75_P01024385		2	18141	0	1	-0.17	0.02
A_75_P01024492		2	19208	0	1	-0.078	0.102
A_75_P01024576		2	20086	0	1	-0.238	0.064
A_75_P01024632		2	20628	0	1	-0.15	0.06
A_75_P01024701		2	21262	0	1	-0.192	0.022
A_75_P01024781		2	22018	0	1	-0.158	0.094
A_75_P01024874		2	22961	0	1	-0.206	-0.034
A_75_P01024949		2	23774	0	1	-0.09	-0.088
A_75_P01025033		2	24599	0	1	-0.11	0.01
A_75_P01025119		2	25416	0	1	-0.078	0.044
A_75_P01025190		2	26191	0	1	-0.074	-0.062
A_75_P01025291		2	27223	0	1	0.004	-0.006
A_75_P01025331		2	27615	0	1	0.146	0.118
A_75_P01025382		2	28099	0	1	0.168	0.032
A_75_P01025443		2	28709	0	1	0.242	0.044
A_75_P01026103		2	35567	0	1	0.058	-0.114
A_75_P01026196		2	36473	0	1	-0.036	-0.036
A_75_P01026261		2	37164	0	1	-0.074	-0.04
A_75_P01026335		2	37919	0	1	-0.128	0.092
A_75_P01026419		2	38763	0	1	-0.2	0.112
A_75_P01026500		2	39564	0	1	-0.044	0.254
A_75_P01026586		2	40420	0	1	-0.0325	-0.036
A_75_P01026672		2	41293	0	1	-0.24	-0.146
A_75_P01026737		2	41984	0	1	0.02	-0.26
A_75_P01026803		2	42676	0	1	-0.2925	-0.432
A_75_P01026821		2	42860	0	1	-0.45	-0.526
A_75_P01026898		2	43659	0	1	-0.356	-0.274
A_75_P01026965		2	44309	0	1	-0.2	-0.166
A_75_P01027037		2	45013	0	1	-0.166	-0.06
A_75_P01027104		2	45655	0	1	0.128	0.068
A_75_P01027162		2	46255	0	1	0.154	0.08
A_75_P01027231		2	46973	0	1	0.06	0.07
A_75_P01027330		2	47964	0	1	-0.07	-0.026
A_75_P01027404		2	48779	0	1	-0.126	-0.096
A_75_P01027532		2	50097	0	1	-0.386	-0.162
A_75_P01027634		2	51080	0	1	-0.178	0.058
A_75_P01027718		2	51934	0	1	-0.042	0.114
A_75_P01027782		2	52585	0	1	-0.088	0.138
A_75_P01027810		2	52872	0	1	-0.568	-0.132
A_75_P01027845		2	53255	0	1	-0.462	-0.04
A_75_P01027916		2	53970	0	1	-0.596	-0.132
A_75_P01028006		2	54946	0	1	-0.604	-0.192
A_75_P01028081		2	55694	0	1	-0.396	-0.158
A_75_P01028146		2	56357	0	1	-0.052	0.15
A_75_P01028222		2	57104	0	1	0.068	0.176
A_75_P01028291		2	57794	0	1	0.234	0.248
A_75_P01028381		2	58739	0	1	0.144	0.304
A_75_P01028443		2	59341	0	1	0.0725	0.098
A_75_P01028561		2	60534	0	1	0.0725	0.08
A_75_P01028662		2	61515	0	1	-0.1725	-0.082
A_75_P01028760		2	62519	0	1	-0.2275	-0.086
A_75_P01028795		2	62860	0	1	-0.1675	-0.092
A_75_P01028843		2	63365	0	1	-0.124	0.12
A_75_P01028926		2	64213	0	1	-0.044	0.084
A_75_P01029029		2	65268	0	1	0.184	0.18
A_75_P01029115		2	66116	0	1	0.06	0.066
A_75_P01029200		2	66916	0	1	0.138	0.066
A_75_P01029291		2	67871	0	1	0.16	-0.22
A_75_P01029360		2	68620	0	1	0.1225	-0.222
A_75_P01029524		2	70229	0	1	-0.0225	-0.242
A_75_P01029605		2	71135	0	1	0.06	-0.52
A_75_P01029690		2	72007	0	1	0.0166667	-0.558
A_75_P01029753		2	72654	0	1	-0.0175	-0.314
A_75_P01029772		2	72840	0	1	-0.26	-0.464
A_75_P01029819		2	73336	0	1	-0.3025	-0.422
A_75_P01029889		2	74085	0	1	-0.24	-0.124
A_75_P01029977		2	74931	0	1	-0.204	-0.162
A_75_P01030072		2	75843	0	1	-0.128	-0.144
A_75_P01030122		2	76363	0	1	-0.078	-0.176
A_75_P01030206		2	77203	0	1	-0.038	-0.178
A_75_P01030268		2	77819	0	1	-0.022	-0.104
A_75_P01030367		2	78816	0	1	-0.204	-0.104
A_75_P01030466		2	79821	0	1	-0.254	-0.16
A_75_P01030541		2	80586	0	1	-0.042	0.128
A_75_P01030637		2	81507	0	1	-0.142	0.022
A_75_P01030750		2	82650	0	1	-0.176	-0.006
A_75_P01030778		2	82955	0	1	-0.196	0.032
A_75_P01030841		2	83518	0	1	-0.2475	-0.132
A_75_P01030927		2	84394	0	1	-0.2975	-0.19
A_75_P01031016		2	85366	0	1	-0.1525	-0.236
A_75_P01031099		2	86197	0	1	-0.095	-0.278
A_75_P01031196		2	87154	0	1	0.1725	-0.268
A_75_P01031252		2	87727	0	1	0.122	-0.074
A_75_P01031374		2	88963	0	1	-0.026	-0.152
A_75_P01031471		2	89889	0	1	-0.222	-0.044
A_75_P01031550		2	90724	0	1	-0.216	0.012
A_75_P01031618		2	91389	0	1	-0.39	-0.2
A_75_P01031679		2	91985	0	1	-0.2375	-0.162
A_75_P01031767		2	92891	0	1	0.0575	-0.068
A_75_P01031790		2	93134	0	1	0.3375	-0.138
A_75_P01031848		2	93746	0	1	0.3575	-0.198
A_75_P01031943		2	94636	0	1	0.33	0.068
A_75_P01032044		2	95681	0	1	0.05	-0.054
A_75_P01032108		2	96289	0	1	-0.102	-0.11
A_75_P01032173		2	96927	0	1	-0.122	-0.036
A_75_P01032242		2	97635	0	1	-0.356	-0.136
A_75_P01032331		2	98465	0	1	-0.634	-0.406
A_75_P01032416		2	99276	0	1	-0.664	-0.514
A_75_P01032490		2	100021	0	1	-0.642	-0.538
A_75_P01032576		2	100910	0	1	-0.698	-0.618
A_75_P01032664		2	101810	0	1	-0.638	-0.452
A_75_P01032737		2	102522	0	1	-0.342	-0.248
A_75_P01032755		2	102691	0	1	-0.13	-0.052
A_75_P01032807		2	103259	0	1	-0.312	-0.142
A_75_P01032882		2	104003	0	1	-0.212	-0.036
A_75_P01032951		2	104701	0	1	-0.09	-0.098
A_75_P01033018		2	105374	0	1	-0.298	-0.1
A_75_P01033092		2	106133	0	1	-0.234	-0.07
A_75_P01033168		2	106844	0	1	-0.055	-0.206
A_75_P01033232		2	107452	0	1	-0.25	-0.322
A_75_P01033310		2	108262	0	1	-0.455	-0.344
A_75_P01033391		2	109092	0	1	-0.16	-0.304
A_75_P01033493		2	110075	0	1	-0.1775	-0.258
A_75_P01033576		2	110856	0	1	-0.138	-0.028
A_75_P01033660		2	111759	0	1	-0.444	-0.216
A_75_P01033692		2	112062	0	1	-0.598	-0.412
A_75_P01033754		2	112753	0	1	-0.628	-0.422
A_75_P01033830		2	113532	0	1	-0.65	-0.456
A_75_P01033893		2	114196	0	1	-0.726	-0.428
A_75_P01033969		2	114957	0	1	-0.3	-0.202
A_75_P01034062		2	115886	0	1	0.02	0.05
A_75_P01034147		2	116755	0	1	-0.078	0.05
A_75_P01034233		2	117605	0	1	-0.202	-0.09
A_75_P01034317		2	118407	0	1	-0.242	-0.146
A_75_P01034418		2	119372	0	1	-0.196	-0.052
A_75_P01034493		2	120115	0	1	-0.304	-0.126
A_75_P01034589		2	121029	0	1	-0.342	-0.222
A_75_P01034649		2	121703	0	1	-0.19	-0.12
A_75_P01034678		2	121976	0	1	-0.188	-0.11
A_75_P01034722		2	122395	0	1	-0.148	-0.128
A_75_P01034805		2	123280	0	1	-0.098	-0.102
A_75_P01034885		2	124056	0	1	-0.196	-0.106
A_75_P01034955		2	124769	0	1	-0.208	-0.104
A_75_P01035047		2	125689	0	1	-0.01	-0.052
A_75_P01035102		2	126203	0	1	-0.098	-0.064
A_75_P01035196		2	127195	0	1	-0.13	-0.045
A_75_P01035275		2	128004	0	1	-0.098	-0.0225
A_75_P01035376		2	129021	0	1	-0.232	-0.1325
A_75_P01035447		2	129739	0	1	-0.332	-0.045
A_75_P01035520		2	130461	0	1	-0.214	-0.075
A_75_P01035592		2	131178	0	1	-0.12	-0.068
A_75_P01035615		2	131397	0	1	0.144	-0.02
A_75_P01035677		2	132041	0	1	0.082	-0.014
A_75_P01035781		2	133103	0	1	-0.006	-0.092
A_75_P01035885		2	134102	0	1	-0.036	-0.034
A_75_P01035954		2	134780	0	1	-0.008	0.042
A_75_P01036030		2	135522	0	1	-0.292	-0.112
A_75_P01036127		2	136448	0	1	-0.208	-0.022
A_75_P01036195		2	137118	0	1	-0.138	-0.052
A_75_P01036247		2	137673	0	1	-0.294	-0.228
A_75_P01036328		2	138476	0	1	-0.292	-0.246
A_75_P01036433		2	139522	0	1	-0.122	-0.062
A_75_P01036512		2	140362	0	1	-0.05	-0.144
A_75_P01036591		2	141128	0	1	-0.328	-0.318
A_75_P01036609		2	141334	0	1	-0.208	-0.136
A_75_P01036648		2	141734	0	1	-0.196	-0.126
A_75_P01036728		2	142562	0	1	-0.424	-0.22
A_75_P01036792		2	143179	0	1	-0.426	-0.164
A_75_P01036844		2	143721	0	1	-0.362	-0.252
A_75_P01036942		2	144651	0	1	-0.514	-0.334
A_75_P01037002		2	145251	0	1	-0.548	-0.402
A_75_P01037067		2	145926	0	1	-0.468	-0.358
A_75_P01037150		2	146725	0	1	-0.41	-0.312
A_75_P01037247		2	147725	0	1	-0.192	-0.026
A_75_P01037314		2	148413	0	1	-0.068	0.07
A_75_P01037411		2	149372	0	1	-0.036	0.076
A_75_P01037515		2	150388	0	1	0.1	0.052
A_75_P01037550		2	150754	0	1	0.036	0.056
A_75_P01037631		2	151586	0	1	-0.104	-0.004
A_75_P01037721		2	152465	0	1	-0.224	-0.152
A_75_P01037794		2	153203	0	1	-0.222	-0.166
A_75_P01037865		2	153948	0	1	-0.138	-0.144
A_75_P01037954		2	154852	0	1	-0.058	-0.136
A_75_P01038069		2	155982	0	1	0.164	-0.01
A_75_P01038144		2	156755	0	1	0.34	0.07
A_75_P01038223		2	157530	0	1	0.19	-0.062
A_75_P01038303		2	158360	0	1	0.032	-0.16
A_75_P01038385		2	159276	0	1	-0.065	-0.534
A_75_P01038562		2	161103	0	1	-0.105	-0.596
A_75_P01038601		2	161475	0	1	-0.1425	-0.56
A_75_P01038649		2	161971	0	1	-0.1675	-0.518
A_75_P01038732		2	162803	0	1	-0.155	-0.382
A_75_P01038790		2	163374	0	1	-0.122	-0.05
A_75_P01038878		2	164306	0	1	-0.214	-0.154
A_75_P01038944		2	165018	0	1	-0.408	-0.334
A_75_P01039010		2	165711	0	1	-0.248	-0.206
A_75_P01039107		2	166634	0	1	-0.118	-0.248
A_75_P01039211		2	167737	0	1	-0.05	-0.176
A_75_P01039289		2	168516	0	1	-0.124	-0.07
A_75_P01039386		2	169508	0	1	-0.088	-0.012
A_75_P01039503		2	170713	0	1	-0.078	-0.0425
A_75_P01039602		2	171730	0	1	-0.022	0.06
A_75_P01039623		2	171931	0	1	-0.034	0.045
A_75_P01039692		2	172661	0	1	0.116	0.115
A_75_P01039776		2	173470	0	1	0.172	0.2025
A_75_P01039846		2	174193	0	1	-0.234	-0.07
A_75_P01039935		2	175080	0	1	-0.252	-0.022
A_75_P01039989		2	175595	0	1	-0.266	-0.002
A_75_P01040065		2	176336	0	1	-0.238	0.002
A_75_P01040131		2	176967	0	1	-0.256	-0.162
A_75_P01040220		2	177831	0	1	0.05	0.07
A_75_P01040332		2	178901	0	1	-0.196	-0.152
A_75_P01040450		2	180045	0	1	-0.326	-0.33
A_75_P01040547		2	181046	0	1	-0.324	-0.382
A_75_P01040627		2	181856	0	1	-0.174	-0.178
A_75_P01040647		2	182066	0	1	-0.064	-0.112
A_75_P01040717		2	182764	0	1	0.098	-0.014
A_75_P01040808		2	183716	0	1	0.108	-0.004
A_75_P01040862		2	184248	0	1	0.148	0.09
A_75_P01040938		2	184992	0	1	0.08	0.118
A_75_P01041027		2	185846	0	1	0.15	0.104
A_75_P01041133		2	186893	0	1	-0.004	0.162
A_75_P01041223		2	187759	0	1	0.154	0.312
A_75_P01041358		2	189103	0	1	-0.062	0.25
A_75_P01041437		2	189879	0	1	-0.254	0.116
A_75_P01041526		2	190790	0	1	-0.384	0.106
A_75_P01041612		2	191655	0	1	-0.288	0.11
A_75_P01041676		2	192272	0	1	-0.516	-0.104
A_75_P01041715		2	192671	0	1	-0.33	-0.104
A_75_P01041786		2	193426	0	1	-0.254	-0.082
A_75_P01041856		2	194137	0	1	-0.234	-0.118
A_75_P01041919		2	194838	0	1	-0.198	-0.198
A_75_P01041987		2	195581	0	1	-0.07	0.044
A_75_P01042049		2	196189	0	1	-0.11	-0.052
A_75_P01042148		2	197205	0	1	-0.06	-0.01
A_75_P01042269		2	198438	0	1	-0.15	-0.032
A_75_P01042370		2	199452	0	1	-0.09	0.068
A_75_P01042454		2	200322	0	1	-0.326	-0.224
A_75_P01042531		2	201031	0	1	-0.418	-0.268
A_75_P01042611		2	201863	0	1	-0.28	-0.232
A_75_P01042686		2	202640	0	1	-0.338	-0.264
A_75_P01042720		2	202986	0	1	-0.396	-0.402
A_75_P01042758		2	203385	0	1	-0.204	-0.386
A_75_P01042848		2	204323	0	1	-0.22	-0.378
A_75_P01042940		2	205204	0	1	-0.23	-0.406
A_75_P01043015		2	205992	0	1	-0.076	-0.27
A_75_P01043089		2	206721	0	1	0.008	-0.118
A_75_P01043150		2	207339	0	1	-0.23	-0.156
A_75_P01043212		2	208001	0	1	-0.262	-0.104
A_75_P01043281		2	208633	0	1	-0.244	-0.122
A_75_P01043359		2	209373	0	1	-0.186	-0.184
A_75_P01043443		2	210191	0	1	-0.396	-0.48
A_75_P01043535		2	211104	0	1	-0.054	-0.194
A_75_P01043621		2	211938	0	1	0.14	-0.1
A_75_P01043652		2	212283	0	1	0.1	-0.074
A_75_P01043702		2	212807	0	1	0.044	-0.14
A_75_P01043772		2	213574	0	1	0.078	0.078
A_75_P01043860		2	214484	0	1	0.066	0.042
A_75_P01043943		2	215327	0	1	-0.052	-0.05
A_75_P01044019		2	216034	0	1	0.02	0.026
A_75_P01044105		2	216896	0	1	-0.168	0.016
A_75_P01044167		2	217528	0	1	-0.142	-0.06
A_75_P01044261		2	218421	0	1	-0.078	0.004
A_75_P01044328		2	219076	0	1	-0.018	0.028
A_75_P01044405		2	219867	0	1	-0.194	0.026
A_75_P01044472		2	220575	0	1	0.042	0.064
A_75_P01045088		2	226877	0	1	0.166	0.224
A_75_P01045127		2	227244	0	1	0.078	0.222
A_75_P01045201		2	227997	0	1	-0.078	0.176
A_75_P01045286		2	228885	0	1	-0.2	0.086
A_75_P01045354		2	229554	0	1	-0.56	0.016
A_75_P01045471		2	230671	0	1	-0.57	-0.06
A_75_P01045539		2	231370	0	1	-0.528	-0.058
A_75_P01045626		2	232222	0	1	-0.306	0.056
A_75_P01045724		2	233190	0	1	-0.096	0.088
A_75_P01045805		2	233982	0	1	0.134	0.146
A_75_P01045891		2	234839	0	1	0.03	0.182
A_75_P01046002		2	235962	0	1	-0.126	0.05
A_75_P01046080		2	236697	0	1	-0.17	0.038
A_75_P01046161		2	237483	0	1	-0.128	0.048
A_75_P01046182		2	237687	0	1	-0.006	0.068
A_75_P01046222		2	238067	0	1	0.04	-0.024
A_75_P01046312		2	238977	0	1	0.026	-0.016
A_75_P01046387		2	239745	0	1	-0.26	-0.176
A_75_P01046455		2	240366	0	1	-0.528	-0.398
A_75_P01046538		2	241231	1	1.10598	-0.672	-0.476
A_75_P01046646		2	242297	1	1.10598	-0.822	-0.544
A_75_P01046715		2	243019	0	1	-0.596	-0.448
A_75_P01046780		2	243687	0	1	-0.458	-0.354
A_75_P01046871		2	244567	0	1	-0.214	-0.086
A_75_P01046930		2	245148	0	1	-0.09	0.02
A_75_P01047006		2	245909	0	1	0.15	0.128
A_75_P01047100		2	246805	0	1	0.066	0.16
A_75_P01047127		2	247149	0	1	0.208	0.294
A_75_P01047179		2	247651	0	1	0.09	0.22
A_75_P01047243		2	248271	0	1	-0.018	0.23
A_75_P01047327		2	249139	0	1	-0.044	0.3
A_75_P01047414		2	250008	0	1	-0.148	0.156
A_75_P01047515		2	250978	0	1	-0.184	0.054
A_75_P01047573		2	251584	0	1	-0.196	0.066
A_75_P01047641		2	252221	0	1	-0.292	-0.056
A_75_P01047756		2	253356	0	1	-0.388	-0.112
A_75_P01047861		2	254360	0	1	-0.252	0.054
A_75_P01047986		2	255628	0	1	-0.278	0.006
A_75_P01048085		2	256658	0	1	-0.146	0.074
A_75_P01048144		2	257254	0	1	-0.076	0.302
A_75_P01048165		2	257478	0	1	0.094	0.324
A_75_P01048293		2	258779	0	1	0.028	0.174
A_75_P01048956		2	265418	0	1	0.092	0.212
A_75_P01049032		2	266209	0	1	0.096	0.176
A_75_P01049131		2	267221	0	1	0.028	-0.032
A_75_P01049204		2	267952	0	1	-0.154	-0.104
A_75_P01049286		2	268746	0	1	-0.316	-0.284
A_75_P01049392		2	269871	0	1	-0.2	-0.21
A_75_P01049460		2	270591	0	1	-0.168	-0.202
A_75_P01049545		2	271413	0	1	0.04	-0.056
A_75_P01049607		2	272073	0	1	0.154	-0.01
A_75_P01049676		2	272789	0	1	0.326	0.17
A_75_P01049695		2	272979	0	1	0.006	0.018
A_75_P01049759		2	273651	0	1	-0.0975	-0.362
A_75_P01049826		2	274291	0	1	-0.23	-0.494
A_75_P01049907		2	275141	0	1	-0.2525	-0.408
A_75_P01049995		2	276008	0	1	-0.2525	-0.364
A_75_P01050058		2	276651	0	1	0.0025	-0.27
A_75_P01050158		2	277640	0	1	0.012	0.124
A_75_P01050236		2	278441	0	1	-0.166	0.064
A_75_P01050328		2	279361	0	1	-0.094	0.072
A_75_P01050419		2	280294	0	1	-0.018	0.03
A_75_P01050498		2	281102	0	1	-0.05	-0.422
A_75_P01050558		2	281729	0	1	-0.2	-0.64
A_75_P01050626		2	282367	0	1	0.175	-0.454
A_75_P01050654		2	282634	0	1	0.16	-0.444
A_75_P01050697		2	283084	0	1	0.12	-0.402
A_75_P01050780		2	283912	0	1	-0.014	0.05
A_75_P01050843		2	284577	0	1	-0.032	0.234
A_75_P01050920		2	285351	0	1	-0.056	0.16
A_75_P01050995		2	286132	0	1	-0.342	0.042
A_75_P01051081		2	286952	0	1	-0.526	-0.062
A_75_P01051181		2	287928	0	1	-0.528	-0.078
A_75_P01051243		2	288604	0	1	-0.354	-0.116
A_75_P01051339		2	289550	0	1	-0.368	-0.054
A_75_P01051452		2	290669	0	1	-0.318	-0.172
A_75_P01051529		2	291449	0	1	-0.316	-0.14
A_75_P01051621		2	292448	0	1	-0.356	-0.236
A_75_P01051644		2	292690	0	1	-0.394	-0.168
A_75_P01051682		2	293080	0	1	-0.4	-0.236
A_75_P01051777		2	294013	0	1	-0.466	-0.198
A_75_P01051881		2	295042	0	1	-0.25	-0.092
A_75_P01051966		2	295921	0	1	-0.202	-0.026
A_75_P01052027		2	296524	0	1	-0.334	-0.138
A_75_P01052102		2	297286	0	1	-0.226	-0.072
A_75_P01052170		2	297987	0	1	0.15	0.084
A_75_P01052239		2	298627	0	1	0.122	0.136
A_75_P01052322		2	299460	0	1	0.134	0.086
A_75_P01052485		2	301177	0	1	0.366	0.172
A_75_P01052585		2	302194	0	1	0.278	0.234
A_75_P01052692		2	303236	0	1	0.182	0.292
A_75_P01052719		2	303536	0	1	0.342	0.334
A_75_P01052761		2	303949	0	1	0.348	0.378
A_75_P01052837		2	304728	0	1	0.154	0.374
A_75_P01052914		2	305503	0	1	-0.078	0.226
A_75_P01052988		2	306245	0	1	-0.184	0.002
A_75_P01053079		2	307153	0	1	-0.364	-0.078
A_75_P01053158		2	307907	0	1	-0.188	-0.02
A_75_P01053226		2	308565	0	1	-0.062	2.77556e-18
A_75_P01053277		2	309086	0	1	-0.038	-0.092
A_75_P01053351		2	309842	0	1	-0.246	-0.066
A_75_P01053416		2	310494	0	1	-0.474	-0.328
A_75_P01053476		2	311100	0	1	-0.598	-0.326
A_75_P01053560		2	311980	0	1	-0.82	-0.392
A_75_P01053595		2	312379	0	1	-0.594	-0.202
A_75_P01053644		2	312858	0	1	-0.462	-0.25
A_75_P01053733		2	313717	0	1	-0.482	-0.218
A_75_P01053812		2	314535	0	1	-0.658	-0.416
A_75_P01053870		2	315133	0	1	-0.448	-0.284
A_75_P01053971		2	316112	0	1	-0.58	-0.364
A_75_P01054047		2	316913	0	1	-0.648	-0.262
A_75_P01054116		2	317581	0	1	-0.496	-0.218
A_75_P01054174		2	318181	0	1	-0.42	0.002
A_75_P01054250		2	318950	0	1	-0.512	-0.328
A_75_P01054329		2	319755	0	1	-0.48	-0.328
A_75_P01054411		2	320548	0	1	-0.224	-0.248
A_75_P01054483		2	321301	0	1	-0.134	-0.12
A_75_P01054514		2	321602	0	1	0.028	-0.184
A_75_P01054576		2	322251	0	1	-0.124	-0.012
A_75_P01054647		2	322952	0	1	-0.026	0.038
A_75_P01054745		2	323927	0	1	-0.276	-0.016
A_75_P01054812		2	324587	0	1	-0.278	-0.102
A_75_P01054891		2	325410	0	1	-0.288	-0.1
A_75_P01054969		2	326230	0	1	0.012	0.008
A_75_P01055041		2	326937	0	1	0.006	0.062
A_75_P01055160		2	328135	0	1	0.29	0.108
A_75_P01055223		2	328774	0	1	0.086	0.132
A_75_P01055296		2	329487	0	1	0.116	0.146
A_75_P01055350		2	330068	0	1	0.074	0.06
A_75_P01055412		2	330733	0	1	0.1	0.042
A_75_P01055432		2	330939	0	1	-0.224	-0.356
A_75_P01055518		2	331773	0	1	0.06	-0.274
A_75_P01055629		2	332850	0	1	0.006	-0.28
A_75_P01055762		2	334201	0	1	-0.058	-0.236
A_75_P01055846		2	335068	0	1	-0.068	-0.294
A_75_P01055930		2	335891	0	1	0.134	0.0625
A_75_P01056016		2	336712	0	1	-0.086	-0.1
A_75_P01056117		2	337718	0	1	0.012	-0.055
A_75_P01056205		2	338617	0	1	-0.008	-0.1525
A_75_P01056272		2	339264	0	1	-0.274	-0.3325
A_75_P01056339		2	339901	0	1	-0.468	-0.3325
A_75_P01056423		2	340690	0	1	-0.448	0.0125
A_75_P01056502		2	341432	1	1.10598	-0.762	0.01
A_75_P01056521		2	341613	1	1.10598	-0.792	0.16
A_75_P01056557		2	342020	0	1	-0.554	0.335
A_75_P01056617		2	342630	0	1	-0.55	0.344
A_75_P01056704		2	343476	0	1	-0.452	0.242
A_75_P01056762		2	344164	0	1	-0.18	0.268
A_75_P01056837		2	344881	0	1	-0.214	0.108
A_75_P01056947		2	345975	0	1	-0.32	0.15
A_75_P01057045		2	346949	0	1	-0.256	0.108
A_75_P01057117		2	347678	0	1	-0.234	0.074
A_75_P01057180		2	348327	0	1	-0.294	0.102
A_75_P01057234		2	348901	0	1	-0.114	0.278
A_75_P01057354		2	350081	0	1	0.012	0.218
A_75_P01057432		2	350867	0	1	0.046	0.13
A_75_P01057465		2	351191	0	1	-0.072	-0.096
A_75_P01057520		2	351707	0	1	-0.094	-0.192
A_75_P01057627		2	352777	0	1	-0.186	-0.236
A_75_P01057722		2	353754	0	1	-0.238	-0.194
A_75_P01057898		2	355507	0	1	-0.154	-0.146
A_75_P01057988		2	356411	0	1	-0.04	0.074
A_75_P01058084		2	357451	0	1	0.066	0.2
A_75_P01058175		2	358398	0	1	0.08	0.242
A_75_P01058252		2	359132	0	1	0.116	0.258
A_75_P01058328		2	359964	0	1	0.166	0.306
A_75_P01058398		2	360656	0	1	0.062	0.26
A_75_P01058487		2	361556	0	1	-0.1	0.076
A_75_P01058521		2	361903	0	1	-0.148	-0.03
A_75_P01058574		2	362428	0	1	-0.114	-0.062
A_75_P01058684		2	363559	0	1	-0.234	-0.114
A_75_P01058759		2	364342	0	1	-0.116	-0.052
A_75_P01058827		2	365042	0	1	0.034	0.056
A_75_P01058914		2	365923	0	1	0.038	0.106
A_75_P01058985		2	366599	0	1	-0.0525	-0.106
A_75_P01059088		2	367591	0	1	0.1225	-0.12
A_75_P01059162		2	368386	0	1	0.1825	-0.15
A_75_P01059248		2	369251	0	1	0.1475	-0.09
A_75_P01059342		2	370207	0	1	0.0875	-0.1675
A_75_P01059426		2	371081	0	1	0.08	0.12
A_75_P01059498		2	371883	0	1	0.082	0.052
A_75_P01059530		2	372276	0	1	0.054	0.032
A_75_P01059576		2	372751	0	1	0.08	0.012
A_75_P01059659		2	373570	0	1	0.212	0.098
A_75_P01059743		2	374424	0	1	0.188	0.052
A_75_P01059845		2	375405	0	1	-0.008	0.128
A_75_P01059911		2	376087	0	1	-0.132	0.04
A_75_P01059980		2	376798	0	1	-0.364	-0.162
A_75_P01060078		2	377742	0	1	-0.58	-0.282
A_75_P01060141		2	378375	0	1	-0.582	-0.324
A_75_P01060226		2	379229	0	1	-0.468	-0.364
A_75_P01060320		2	380095	0	1	-0.31	-0.238
A_75_P01060405		2	380970	0	1	-0.08	-0.02
A_75_P01060485		2	381775	0	1	-0.008	0.076
A_75_P01060523		2	382153	0	1	-0.074	0.09
A_75_P01060583		2	382776	0	1	-0.348	0.008
A_75_P01060683		2	383765	0	1	-0.59	-0.162
A_75_P01060769		2	384640	1	1.10598	-0.832	-0.358
A_75_P01060846		2	385404	1	1.10598	-0.736	-0.326
A_75_P01060908		2	386036	1	1.10598	-0.702	-0.238
A_75_P01060979		2	386757	0	1	-0.538	-0.246
A_75_P01061048		2	387469	0	1	-0.34	-0.008
A_75_P01061134		2	388310	0	1	-0.156	0.178
A_75_P01061207		2	389070	0	1	-0.328	0.066
A_75_P01061287		2	389885	0	1	-0.258	0.046
A_75_P01061342		2	390463	0	1	-0.072	0.14
A_75_P01061430		2	391312	0	1	-0.082	-0.01
A_75_P01061477		2	391775	0	1	-0.034	-0.082
A_75_P01061538		2	392356	0	1	0.076	0.02
A_75_P01061620		2	393175	0	1	0.118	0.018
A_75_P01061688		2	393804	0	1	0.104	0.024
A_75_P01061755		2	394477	0	1	0.066	0.064
A_75_P01061848		2	395496	0	1	0.082	0.142
A_75_P01061939		2	396452	0	1	0.258	0.126
A_75_P01062014		2	397188	0	1	0.148	0.174
A_75_P01062064		2	397714	0	1	0.17	0.18
A_75_P01062145		2	398555	0	1	0.174	0.208
A_75_P01062238		2	399498	0	1	0.212	0.12
A_75_P01062308		2	400229	0	1	-0.09	-0.072
A_75_P01062406		2	401239	0	1	-0.098	-0.182
A_75_P01062425		2	401429	0	1	-0.27	-0.22
A_75_P01062462		2	401810	0	1	-0.386	-0.23
A_75_P01062583		2	403001	0	1	-0.6	-0.296
A_75_P01062643		2	403579	0	1	-0.34	-0.144
A_75_P01062699		2	404162	0	1	-0.3	-0.056
A_75_P01062785		2	405023	0	1	-0.234	-0.046
A_75_P01062889		2	406060	0	1	-0.124	0.06
A_75_P01062951		2	406699	0	1	0.078	0.224
A_75_P01063038		2	407578	0	1	0.022	0.232
A_75_P01063120		2	408352	0	1	-0.026	0.108
A_75_P01063261		2	409802	0	1	0.098	0.14
A_75_P01063376		2	410922	0	1	0.02	0.042
A_75_P01063466		2	411808	0	1	-0.128	-0.148
A_75_P01063485		2	411986	0	1	-0.09	-0.088
A_75_P01063524		2	412387	0	1	-0.11	-0.032
A_75_P01063595		2	413082	0	1	-0.13	-0.052
A_75_P01063676		2	413918	0	1	0.03	-0.04
A_75_P01063784		2	415011	0	1	0.096	0.066
A_75_P01063863		2	415821	0	1	0.118	0.116
A_75_P01063920		2	416437	0	1	0.304	0.154
A_75_P01064014		2	417390	0	1	0.054	0.05
A_75_P01064112		2	418361	0	1	0.102	0.132
A_75_P01064218		2	419444	0	1	-0.052	0.038
A_75_P01064287		2	420160	0	1	-0.108	-0.06
A_75_P01064407		2	421407	0	1	-0.208	-0.032
A_75_P01064492		2	422332	0	1	-0.194	0.098
A_75_P01064542		2	422805	0	1	-0.254	-0.016
A_75_P01064602		2	423395	0	1	-0.152	-0.028
A_75_P01064702		2	424404	0	1	-0.26	-0.078
A_75_P01064756		2	424961	0	1	-0.284	-0.198
A_75_P01064833		2	425688	0	1	0.022	-0.184
A_75_P01064915		2	426535	0	1	0	-0.148
A_75_P01064988		2	427297	0	1	0.046	-0.034
A_75_P01065089		2	428344	0	1	0.036	-0.128
A_75_P01065147		2	428945	0	1	0.102	-0.024
A_75_P01065260		2	430031	0	1	-0.084	-0.116
A_75_P01065350		2	430989	0	1	-0.162	-0.078
A_75_P01065455		2	432010	0	1	-0.162	-0.064
A_75_P01065531		2	432798	0	1	-0.098	0.11
A_75_P01065566		2	433129	0	1	-0.088	0.09
A_75_P01065619		2	433647	0	1	-0.096	0.106
A_75_P01065732		2	434788	0	1	-0.166	0.1
A_75_P01065813		2	435599	0	1	-0.086	0.128
A_75_P01065887		2	436355	0	1	0.062	0.206
A_75_P01065957		2	437084	0	1	-0.22	0.222
A_75_P01066061		2	438082	0	1	-0.106	0.218
A_75_P01066130		2	438754	0	1	0.084	0.148
A_75_P01066244		2	439847	0	1	-0.148	0.114
A_75_P01066303		2	440457	0	1	-0.196	0.02
A_75_P01066392		2	441303	0	1	0.136	-0.026
A_75_P01066482		2	442245	0	1	-0.036	0.02
A_75_P01066584		2	443314	0	1	-0.1425	-0.242
A_75_P01066612		2	443588	0	1	0.1775	-0.216
A_75_P01066679		2	444257	0	1	0.0975	-0.256
A_75_P01066752		2	445030	0	1	0.0275	-0.24
A_75_P01066821		2	445725	0	1	0.245	-0.136
A_75_P01066895		2	446434	0	1	0.004	0.008
A_75_P01067003		2	447554	0	1	-0.062	-0.048
A_75_P01067101		2	448558	0	1	0.01	0.02
A_75_P01067276		2	450302	0	1	-0.096	0.048
A_75_P01067350		2	451078	0	1	-0.308	-0.074
A_75_P01067410		2	451715	0	1	-0.34	-0.116
A_75_P01067469		2	452318	0	1	-0.444	-0.082
A_75_P01067532		2	452882	0	1	-0.444	-0.156
A_75_P01067558		2	453157	0	1	-0.485	-0.452
A_75_P01067610		2	453654	0	1	-0.376667	-0.642
A_75_P01067693		2	454446	0	1	0.14	-0.474
A_75_P01067760		2	455154	0	1	0.456667	-0.514
A_75_P01067858		2	456214	0	1	0.0466667	-0.54
A_75_P01067927		2	456980	0	1	-0.0225	-0.3475
A_75_P01067998		2	457701	0	1	-0.094	0.0075
A_75_P01068086		2	458585	0	1	-0.158	0.045
A_75_P01068147		2	459253	0	1	-0.286	0.0875
A_75_P01068210		2	459925	0	1	0.026	0.2225
A_75_P01068281		2	460645	0	1	-0.066	0.198
A_75_P01068377		2	461661	0	1	0.106	0.124
A_75_P01068434		2	462224	0	1	0.154	0.102
A_75_P01068457		2	462455	0	1	0.164	0.052
A_75_P01068507		2	462943	0	1	-0.1	-0.044
A_75_P01068580		2	463657	0	1	-0.184	-0.34
A_75_P01068639		2	464259	0	1	-0.288	-0.404
A_75_P01068718		2	465097	1	1.10598	-0.68	-0.712
A_75_P01068825		2	466160	2	0.173737	-0.786	-0.862
A_75_P01068913		2	467060	2	0.173737	-0.72	-0.734
A_75_P01068999		2	467938	0	1	-0.522	-0.442
A_75_P01069101		2	468982	1	1.10598	-0.6425	-0.656
A_75_P01069184		2	469818	1	1.10598	-0.47	-0.554
A_75_P01069253		2	470518	1	1.10598	-0.3175	-0.332
A_75_P01069343		2	471453	1	1.10598	-0.27	-0.458
A_75_P01069422		2	472259	1	1.10598	-0.175	-0.484
A_75_P01069446		2	472496	0	1	-0.384	-0.428
A_75_P01069492		2	472962	0	1	-0.142	-0.222
A_75_P01069578		2	473848	0	1	-0.162	-0.252
A_75_P01069703		2	475139	0	1	-0.114	-0.198
A_75_P01069776		2	475896	0	1	-0.1	-0.212
A_75_P01069851		2	476678	0	1	0.026	0.002
A_75_P01069921		2	477386	0	1	-0.228	-0.092
A_75_P01070090		2	479233	0	1	-0.164	-0.11
A_75_P01070190		2	480245	0	1	-0.246	-0.28
A_75_P01070274		2	481088	0	1	-0.222	-0.24
A_75_P01070346		2	481827	0	1	-0.03	-0.198
A_75_P01070412		2	482464	0	1	0.15	-0.064
A_75_P01070490		2	483224	0	1	0.086	-0.058
A_75_P01070518		2	483533	0	1	0.132	0.106
A_75_P01070591		2	484288	0	1	0.0525	-0.198
A_75_P01070677		2	485202	0	1	-0.0225	-0.184
A_75_P01070758		2	486012	0	1	-0.28	-0.326
A_75_P01070860		2	487057	0	1	-0.255	-0.294
A_75_P01070967		2	488160	0	1	-0.135	-0.272
A_75_P01071051		2	488955	0	1	-0.086	0.076
A_75_P01071119		2	489725	0	1	-0.206	-0.146
A_75_P01071218		2	490788	0	1	-0.108	-0.088
A_75_P01071321		2	491806	0	1	-0.028	-0.092
A_75_P01071413		2	492772	0	1	-0.068	-0.058
A_75_P01071491		2	493640	0	1	-0.174	-0.158
A_75_P01071582		2	494549	0	1	-0.042	0.022
A_75_P01071629		2	495007	0	1	-0.11	-0.132
A_75_P01071707		2	495794	0	1	-0.222	-0.144
A_75_P01071812		2	496784	0	1	-0.282	-0.176
A_75_P01071900		2	497631	0	1	-0.26	-0.176
A_75_P01071971		2	498344	0	1	-0.278	-0.138
A_75_P01072052		2	499130	0	1	-0.17	0.004
A_75_P01072111		2	499691	0	1	-0.2025	-0.26
A_75_P01072205		2	500579	0	1	-0.1	-0.228
A_75_P01072294		2	501534	0	1	0.13	-0.08
A_75_P01072352		2	502111	0	1	0.015	-0.142
A_75_P01072412		2	502727	0	1	-0.0575	-0.214
A_75_P01072487		2	503488	0	1	-0.018	0.002
A_75_P01072569		2	504372	0	1	0.032	0.014
A_75_P01072606		2	504697	0	1	-0.072	-0.1175
A_75_P01072655		2	505224	0	1	0.028	-0.11
A_75_P01072733		2	506039	0	1	0.06	-0.1875
A_75_P01072832		2	507065	0	1	0.094	-0.0125
A_75_P01072894		2	507687	0	1	-8.32667e-18	-0.1075
A_75_P01072963		2	508377	0	1	0.052	0.058
A_75_P01073052		2	509306	0	1	0.102	0.094
A_75_P01073140		2	510191	0	1	-0.086	-0.026
A_75_P01073210		2	510839	0	1	-0.248	-0.182
A_75_P01073293		2	511682	0	1	-0.296	-0.136
A_75_P01073391		2	512656	0	1	-0.31	-0.266
A_75_P01073499		2	513784	0	1	-0.368	-0.31
A_75_P01073587		2	514645	0	1	-0.072	-0.02
A_75_P01073615		2	514936	0	1	-0.072	-0.064
A_75_P01073663		2	515423	0	1	0.004	-0.06
A_75_P01073769		2	516489	0	1	0.012	-0.194
A_75_P01073834		2	517155	0	1	0.024	-0.17
A_75_P01073902		2	517845	0	1	0.09	-0.202
A_75_P01073960		2	518410	0	1	0.22	-0.024
A_75_P01074040		2	519273	0	1	0.216	-0.098
A_75_P01074119		2	520036	0	1	0.088	0.056
A_75_P01074218		2	521017	0	1	0.094	0.06
A_75_P01074296		2	521806	0	1	-0.07	-0.038
A_75_P01074401		2	522909	0	1	-0.276	-0.298
A_75_P01074472		2	523561	0	1	-0.306	-0.198
A_75_P01074549		2	524349	0	1	-0.136	-0.084
A_75_P01074564		2	524528	0	1	-0.214	-0.082
A_75_P01074632		2	525212	0	1	-0.18	0.048
A_75_P01074729		2	526242	0	1	-0.092	0.2925
A_75_P01074800		2	526914	1	1.10598	-0.052	0.2375
A_75_P01074880		2	527733	1	1.10598	-0.122	0.12
A_75_P01074979		2	528755	3	0.00643189	-0.614	-0.5475
A_75_P01075116		2	530075	4	0.00013404	-0.902	-1.1325
A_75_P01075223		2	531202	4	0.00013404	-0.718	-0.838
A_75_P01075288		2	531913	4	0.00013404	-0.598	-0.772
A_75_P01075360		2	532621	4	0.00013404	-0.766	-0.942
A_75_P01075427		2	533362	2	0.173737	-0.254	-0.39
A_75_P01075499		2	534039	0	1	0.096	0.038
A_75_P01075564		2	534728	0	1	0.1	0.058
A_75_P01075584		2	534919	0	1	0.014	0.008
A_75_P01075645		2	535548	0	1	-0.014	0.086
A_75_P01075754		2	536664	0	1	0.036	0.064
A_75_P01075828		2	537420	0	1	-0.112	0.04
A_75_P01075917		2	538337	0	1	-0.164	0.006
A_75_P01075991		2	539063	0	1	-0.28	-0.024
A_75_P01076077		2	539869	0	1	-0.266	-0.092
A_75_P01076167		2	540755	0	1	-0.214	-0.042
A_75_P01076253		2	541612	0	1	0.026	0.088
A_75_P01076340		2	542501	0	1	-0.148	0.06
A_75_P01076485		2	543906	0	1	-0.066	0.092
A_75_P01076549		2	544549	0	1	0.076	0.21
A_75_P01076563		2	544713	0	1	0.036	0.246
A_75_P01076609		2	545168	0	1	-0.072	0.158
A_75_P01076673		2	545819	0	1	0.092	0.1
A_75_P01076758		2	546643	0	1	0.108	0.058
A_75_P01076852		2	547592	0	1	0.064	0.022
A_75_P01076975		2	548878	0	1	-0.048	-0.076
A_75_P01077046		2	549659	0	1	-0.062	-0.152
A_75_P01077150		2	550719	0	1	-0.022	-0.074
A_75_P01077271		2	551908	0	1	-0.066	-0.018
A_75_P01077371		2	552922	0	1	0.08	0.038
A_75_P01077454		2	553740	0	1	0.192	0.052
A_75_P01077531		2	554502	0	1	0.036	0.094
A_75_P01077612		2	555332	0	1	0.002	0.144
A_75_P01077635		2	555544	0	1	-0.14	-0.07
A_75_P01077686		2	556075	0	1	-0.12	-0.01
A_75_P01077760		2	556868	0	1	-0.27	-0.048
A_75_P01077816		2	557437	0	1	-0.346	-0.048
A_75_P01077910		2	558338	0	1	-0.504	-0.306
A_75_P01077971		2	558946	0	1	-0.548	-0.266
A_75_P01078041		2	559649	0	1	-0.712	-0.344
A_75_P01078121		2	560446	0	1	-0.55	-0.324
A_75_P01078199		2	561189	0	1	-0.292	-0.3
A_75_P01078283		2	562031	0	1	-0.162	-0.108
A_75_P01078380		2	563048	0	1	0.124	-0.006
A_75_P01078454		2	563796	0	1	0.196	0.08
A_75_P01078551		2	564792	0	1	0.242	0.09
A_75_P01078576		2	565024	0	1	0.192	0.048
A_75_P01078624		2	565507	0	1	0.238	0.076
A_75_P01078719		2	566475	0	1	0.176	0.05
A_75_P01078799		2	567302	0	1	0.13	-0.08
A_75_P01078871		2	568039	0	1	0.05	0.004
A_75_P01078966		2	568986	0	1	-0.024	-0.006
A_75_P01079068		2	570028	0	1	-0.066	-0.068
A_75_P01079134		2	570676	0	1	-0.202	-0.024
A_75_P01079192		2	571286	0	1	-0.096	0.054
A_75_P01079277		2	572141	0	1	0.022	0.042
A_75_P01079346		2	572798	0	1	0.15	0.07
A_75_P01079438		2	573679	0	1	0.152	0.086
A_75_P01079519		2	574497	0	1	0.284	0.096
A_75_P01079543		2	574742	0	1	0.284	0.106
A_75_P01079637		2	575668	0	1	0.222	0.066
A_75_P01079736		2	576680	0	1	0.34	0.116
A_75_P01079799		2	577325	0	1	0.408	0.168
A_75_P01079891		2	578250	0	1	0.306	0.126
A_75_P01079977		2	579082	0	1	0.36	0.104
A_75_P01080036		2	579688	0	1	0.404	0.158
A_75_P01080109		2	580494	0	1	0.25	0.194
A_75_P01080212		2	581538	0	1	0.016	0.128
A_75_P01080295		2	582389	0	1	-0.132	0.048
A_75_P01080368		2	583145	0	1	-0.244	0.11
A_75_P01080508		2	584514	0	1	-0.466	-0.092
A_75_P01080568		2	585219	0	1	-0.486	-0.082
A_75_P01080590		2	585446	0	1	-0.26	-0.026
A_75_P01080643		2	585986	0	1	-0.226	0.122
A_75_P01080730		2	586873	0	1	-0.264	0.016
A_75_P01080812		2	587689	0	1	-0.276	0.108
A_75_P01080893		2	588511	0	1	-0.294	-0.116
A_75_P01080976		2	589338	0	1	-0.292	-0.166
A_75_P01081050		2	590108	0	1	-0.114	-0.22
A_75_P01081142		2	591042	0	1	-0.278	-0.372
A_75_P01081202		2	591658	0	1	-0.13	-0.43
A_75_P01081314		2	592805	0	1	-0.014	-0.274
A_75_P01081373		2	593437	0	1	-0.246	-0.406
A_75_P01081426		2	593999	0	1	-0.164	-0.318
A_75_P01081495		2	594698	0	1	-0.06	-0.116
A_75_P01081514		2	594895	0	1	-0.074	-0.082
A_75_P01081583		2	595583	0	1	-0.25	-0.136
A_75_P01081685		2	596538	0	1	-0.07	-0.028
A_75_P01081769		2	597395	0	1	-0.04	-0.114
A_75_P01081832		2	597999	0	1	0.064	-0.172
A_75_P01081907		2	598743	0	1	0.064	-0.092
A_75_P01082024		2	599869	0	1	0.288	-0.01
A_75_P01082131		2	600907	0	1	0.378	-0.012
A_75_P01082213		2	601732	0	1	0.284	0.026
A_75_P01082277		2	602327	0	1	0.24	0.156
A_75_P01082352		2	603111	0	1	0.22	0.072
A_75_P01082424		2	603874	0	1	0.268	0.088
A_75_P01082514		2	604758	0	1	0.234	0.146
A_75_P01082547		2	605094	0	1	0.136	0.12
A_75_P01082597		2	605631	0	1	-0.012	-0.318
A_75_P01082698		2	606670	0	1	-0.03	-0.344
A_75_P01082752		2	607248	0	1	-0.04	-0.39
A_75_P01082824		2	607955	0	1	-0.096	-0.408
A_75_P01082915		2	608872	0	1	0.004	-0.424
A_75_P01082992		2	609676	0	1	0.14	-0.154
A_75_P01083062		2	610380	0	1	0.116	-0.158
A_75_P01083129		2	611082	0	1	-0.072	-0.052
A_75_P01083188		2	611702	0	1	-0.25	-0.422
A_75_P01083266		2	612581	0	1	-0.486	-0.546
A_75_P01083341		2	613383	1	1.10598	-0.58	-0.792
A_75_P01083436		2	614327	1	1.10598	-0.4125	-0.746
A_75_P01083465		2	614628	1	1.10598	-0.2825	-0.832
A_75_P01083524		2	615239	0	1	-0.07	-0.516
A_75_P01083602		2	616044	0	1	0.0475	-0.586
A_75_P01083683		2	616855	0	1	0.114	-0.286
A_75_P01083755		2	617588	0	1	0.076	-0.114
A_75_P01083834		2	618434	0	1	-0.138	-0.142
A_75_P01083931		2	619416	0	1	-0.14	-0.074
A_75_P01084002		2	620150	0	1	-0.084	-0.098
A_75_P01084083		2	620993	0	1	-0.048	-0.104
A_75_P01084154		2	621715	0	1	-0.05	-0.13
A_75_P01084210		2	622308	0	1	0.078	-0.068
A_75_P01084315		2	623319	0	1	-0.006	-0.16
A_75_P01084391		2	624084	0	1	0.026	0.096
A_75_P01084423		2	624451	0	1	-0.182	-0.166
A_75_P01084462		2	624857	0	1	-0.164	-0.152
A_75_P01084549		2	625735	0	1	-0.124	-0.16
A_75_P01084640		2	626598	0	1	-0.226	-0.204
A_75_P01084718		2	627342	0	1	-0.228	-0.23
A_75_P01084813		2	628273	0	1	-0.046	0.112
A_75_P01084869		2	628922	0	1	-0.092	0.022
A_75_P01084932		2	629544	0	1	-0.076	0.032
A_75_P01085023		2	630480	0	1	0.044	0.094
A_75_P01085121		2	631539	0	1	0.076	0.044
A_75_P01085221		2	632568	0	1	0.006	-0.026
A_75_P01085279		2	633155	0	1	-0.02	-0.078
A_75_P01085364		2	634067	0	1	0.044	-0.08
A_75_P01085421		2	634641	0	1	-0.05	-0.054
A_75_P01085492		2	635379	0	1	-0.146	-0.084
A_75_P01085547		2	635935	0	1	-0.072	-0.076
A_75_P01085646		2	636904	0	1	-0.178	-0.14
A_75_P01085766		2	638149	0	1	-0.222	-0.132
A_75_P01085852		2	639042	0	1	-0.02	-0.078
A_75_P01085941		2	639905	0	1	-0.094	-0.042
A_75_P01086030		2	640780	0	1	-0.316	-0.152
A_75_P01086102		2	641479	0	1	0.022	0.15
A_75_P01086203		2	642528	0	1	0.09	0.322
A_75_P01086325		2	643801	0	1	-0.058	0.276
A_75_P01086439		2	644960	0	1	0.232	0.376
A_75_P01086473		2	645276	0	1	0.372	0.478
A_75_P01086541		2	645947	0	1	0.13	0.246
A_75_P01086619		2	646726	0	1	0.038	0.096
A_75_P01086683		2	647346	0	1	0.154	0.162
A_75_P01086751		2	648045	0	1	0.11	0.12
A_75_P01086840		2	648947	0	1	0.134	0.12
A_75_P01086921		2	649746	0	1	0.09	0.166
A_75_P01086989		2	650429	0	1	0.204	0.168
A_75_P01087074		2	651249	0	1	0.206	0.184
A_75_P01087188		2	652386	0	1	-0.108	0.014
A_75_P01087268		2	653243	0	1	-0.064	0.064
A_75_P01087374		2	654300	0	1	-0.046	5.55112e-18
A_75_P01087458		2	655169	0	1	-0.284	-0.19
A_75_P01087486		2	655471	0	1	-0.412	-0.324
A_75_P01087536		2	655973	0	1	-0.2325	-0.464
A_75_P01087661		2	657251	0	1	-0.27	-0.53
A_75_P01087747		2	658061	0	1	-0.3875	-0.592
A_75_P01087831		2	658929	0	1	-0.2125	-0.478
A_75_P01087915		2	659798	0	1	-0.0725	-0.39
A_75_P01088000		2	660701	0	1	-0.028	-0.132
A_75_P01088096		2	661690	0	1	-0.072	-0.18
A_75_P01088160		2	662404	0	1	0.126	-0.022
A_75_P01088245		2	663291	0	1	-0.156	-0.056
A_75_P01088354		2	664460	0	1	-0.074	-0.08
A_75_P01088450		2	665449	0	1	-0.01	-0.05
A_75_P01088530		2	666238	0	1	0.016	0.07
A_75_P01088560		2	666538	0	1	0.018	-0.06
A_75_P01088609		2	667069	0	1	0.34	-0.0075
A_75_P01088682		2	667802	0	1	0.23	-0.04
A_75_P01088793		2	668973	0	1	0.134	-0.0425
A_75_P01088884		2	669847	0	1	0.118	-0.0775
A_75_P01088978		2	670742	0	1	-0.036	-0.075
A_75_P01089049		2	671488	0	1	-0.026	-0.012
A_75_P01089124		2	672238	0	1	0.036	0.09
A_75_P01089214		2	673166	0	1	0.058	0.186
A_75_P01089303		2	674053	0	1	0.128	0.224
A_75_P01089405		2	675071	0	1	0.216	0.326
A_75_P01089468		2	675722	0	1	-0.006	0.214
A_75_P01089558		2	676583	0	1	0.034	0.17
A_75_P01089582		2	676820	0	1	0.074	0.05
A_75_P01089639		2	677374	0	1	-0.11	-0.084
A_75_P01089719		2	678186	0	1	0.002	-0.108
A_75_P01089793		2	678928	0	1	0.208	0.006
A_75_P01089902		2	679940	0	1	-0.092	-0.018
A_75_P01090009		2	681037	0	1	-0.082	0.028
A_75_P01090113		2	682096	0	1	0.078	0.056
A_75_P01090179		2	682831	0	1	0.04	0.152
A_75_P01090246		2	683570	0	1	-0.164	-0.014
A_75_P01090333		2	684424	0	1	0.108	0.002
A_75_P01090426		2	685395	0	1	-0.076	-0.192
A_75_P01090516		2	686332	0	1	-0.254	-0.338
A_75_P01090597		2	687147	0	1	-0.208	-0.356
A_75_P01090616		2	687333	0	1	-0.266	-0.416
A_75_P01090663		2	687804	0	1	-0.25	-0.362
A_75_P01090759		2	688755	0	1	-0.282	-0.398
A_75_P01090831		2	689510	0	1	-0.138	-0.256
A_75_P01090918		2	690427	0	1	-0.052	-0.23
A_75_P01090974		2	690989	0	1	0.184	0.056
A_75_P01091062		2	691851	0	1	0.06	0.014
A_75_P01091130		2	692552	0	1	0.416	0.324
A_75_P01091235		2	693629	0	1	0.394	0.348
A_75_P01091344		2	694675	0	1	0.044	0.04
A_75_P01091419		2	695449	0	1	0.158	0.044
A_75_P01091505		2	696349	0	1	0.306	0.11
A_75_P01091609		2	697388	0	1	0.108	-0.028
A_75_P01091628		2	697596	0	1	0.05	-0.074
A_75_P01091687		2	698171	0	1	0.018	0.092
A_75_P01091755		2	698879	0	1	-0.072	0.012
A_75_P01091851		2	699887	0	1	-0.238	-0.218
A_75_P01091936		2	700731	0	1	-0.35	-0.254
A_75_P01092019		2	701590	0	1	-0.222	-0.214
A_75_P01092082		2	702232	0	1	-0.17	-0.25
A_75_P01092147		2	702970	0	1	-0.194	-0.33
A_75_P01092241		2	703991	0	1	-0.14	-0.268
A_75_P01092314		2	704716	0	1	-0.198	-0.408
A_75_P01092401		2	705619	0	1	-0.26	-0.374
A_75_P01092485		2	706470	0	1	-0.064	-0.226
A_75_P01092550		2	707114	0	1	-0.018	-0.166
A_75_P01092591		2	707523	0	1	0.092	-0.026
A_75_P01092654		2	708159	0	1	0.266	0.158
A_75_P01092724		2	708819	0	1	0.318	0.186
A_75_P01092827		2	709781	0	1	0.25	0.152
A_75_P01092890		2	710428	0	1	0.116	0.138
A_75_P01092984		2	711467	0	1	-0.094	0.048
A_75_P01093072		2	712323	0	1	-0.256	-0.066
A_75_P01093140		2	713026	0	1	-0.372	-0.146
A_75_P01093284		2	714476	0	1	-0.302	-0.202
A_75_P01093346		2	715159	0	1	-0.36	-0.248
A_75_P01093429		2	716045	0	1	-0.186	-0.242
A_75_P01093537		2	717078	0	1	-0.212	-0.162
A_75_P01093610		2	717863	0	1	-0.468	-0.274
A_75_P01093645		2	718234	0	1	-0.602	-0.318
A_75_P01093686		2	718702	0	1	-0.448	-0.332
A_75_P01093784		2	719693	0	1	-0.508	-0.404
A_75_P01093846		2	720315	0	1	-0.5	-0.368
A_75_P01093908		2	720940	0	1	-0.11	-0.178
A_75_P01093964		2	721507	0	1	-0.174	-0.31
A_75_P01094072		2	722553	0	1	-0.5	-0.336
A_75_P01094146		2	723288	0	1	-0.636	-0.3
A_75_P01094214		2	723943	0	1	-0.506	-0.31
A_75_P01094273		2	724534	0	1	-0.658	-0.404
A_75_P01094351		2	725306	0	1	-0.452	-0.186
A_75_P01094450		2	726317	0	1	-0.152	-0.138
A_75_P01094567		2	727443	0	1	-0.116	-0.258
A_75_P01094585		2	727647	0	1	-0.196	-0.188
A_75_P01094618		2	728020	0	1	-0.086	-0.22
A_75_P01094685		2	728723	0	1	-0.204	-0.262
A_75_P01094834		2	730242	0	1	-0.126	-0.19
A_75_P01094940		2	731284	0	1	1.11022e-17	-0.032
A_75_P01095008		2	731972	0	1	0.144	-0.01
A_75_P01095113		2	733039	0	1	0.182	0.068
A_75_P01095188		2	733774	0	1	0.276	0.056
A_75_P01095269		2	734570	0	1	0.07	-0.044
A_75_P01095371		2	735599	0	1	0.014	-0.074
A_75_P01095443		2	736352	0	1	0.048	-0.116
A_75_P01095543		2	737364	0	1	-0.216	-0.176
A_75_P01095563		2	737573	0	1	-0.272	-0.152
A_75_P01095605		2	738044	0	1	-0.312	-0.09
A_75_P01095693		2	738932	0	1	-0.414	-0.134
A_75_P01095775		2	739753	0	1	-0.616	-0.128
A_75_P01095851		2	740529	0	1	-0.36	0.02
A_75_P01095950		2	741546	0	1	-0.344	0.002
A_75_P01096049		2	742544	0	1	-0.142	0.094
A_75_P01096125		2	743309	0	1	-0.01	0.21
A_75_P01096257		2	744609	0	1	-0.032	0.118
A_75_P01096316		2	745205	0	1	-0.194	-0.014
A_75_P01096407		2	746156	0	1	-0.108	-0.012
A_75_P01096516		2	747230	0	1	-0.172	-0.136
A_75_P01096631		2	748416	0	1	-0.242	-0.234
A_75_P01096648		2	748609	0	1	-0.366	-0.316
A_75_P01096714		2	749276	0	1	-0.128	-0.192
A_75_P01096795		2	750100	0	1	-0.17	-0.202
A_75_P01096888		2	751026	0	1	-0.1	-0.156
A_75_P01096981		2	751963	0	1	-0.056	-0.054
A_75_P01097070		2	752872	0	1	0.302	0.168
A_75_P01097148		2	753658	0	1	0.046	-0.004
A_75_P01097219		2	754363	0	1	-0.238	-0.08
A_75_P01097292		2	755117	0	1	-0.212	-0.09
A_75_P01097368		2	755943	0	1	-0.15	-0.106
A_75_P01097442		2	756682	0	1	-0.29	-0.172
A_75_P01097533		2	757610	0	1	-0.114	-0.032
A_75_P01097617		2	758457	0	1	-0.002	-0.192
A_75_P01097635		2	758628	0	1	-0.118	-0.096
A_75_P01097694		2	759236	0	1	-0.058	-0.066
A_75_P01097793		2	760230	0	1	-0.008	-0.004
A_75_P01097860		2	760907	0	1	2.77556e-18	-0.002
A_75_P01097955		2	761893	0	1	0.194	0.278
A_75_P01098034		2	762707	0	1	0.08	0.006
A_75_P01098144		2	763781	0	1	-0.038	-0.046
A_75_P01098237		2	764710	0	1	-0.08	-0.204
A_75_P01098318		2	765554	0	1	-0.252	-0.176
A_75_P01098401		2	766397	0	1	-0.4075	-0.452
A_75_P01098481		2	767204	0	1	-0.165	-0.278
A_75_P01098555		2	767937	0	1	-0.6225	-0.42
A_75_P01098620		2	768598	0	1	-0.57	-0.234
A_75_P01098641		2	768815	0	1	-0.37	-0.262
A_75_P01098709		2	769482	0	1	-0.236	1.00614e-17
A_75_P01098798		2	770332	0	1	-0.262	1.00614e-17
A_75_P01098879		2	771160	0	1	0.126	0.168
A_75_P01098960		2	771994	0	1	-0.058	0.018
A_75_P01099058		2	772966	0	1	-0.232	-0.116
A_75_P01099147		2	773834	0	1	-0.418	-0.124
A_75_P01099213		2	774522	0	1	-0.38	-0.114
A_75_P01099304		2	775449	0	1	-0.514	-0.184
A_75_P01099419		2	776639	0	1	-0.254	-0.162
A_75_P01099514		2	777550	0	1	-0.306	-0.302
A_75_P01099610		2	778548	0	1	-0.134	-0.262
A_75_P01099665		2	779106	0	1	-0.168	-0.254
A_75_P01099700		2	779461	0	1	-0.184	-0.23
A_75_P01099754		2	779987	0	1	-0.254	-0.252
A_75_P01099839		2	780884	0	1	-0.088	0.004
A_75_P01099928		2	781781	0	1	-0.056	-2.77556e-18
A_75_P01100004		2	782555	0	1	-0.25	-0.066
A_75_P01100088		2	783463	0	1	-0.236	-0.074
A_75_P01100222		2	784781	0	1	-0.16	0.03
A_75_P01100300		2	785574	0	1	-0.13	0.052
A_75_P01100394		2	786499	0	1	-0.21	0.054
A_75_P01100461		2	787168	0	1	-0.058	0.13
A_75_P01100536		2	787930	0	1	0.066	0.18
A_75_P01100637		2	788900	0	1	0.024	0.158
A_75_P01100726		2	789779	0	1	-0.14	0.04
A_75_P01100745		2	789959	0	1	-0.066	0.006
A_75_P01100792		2	790472	0	1	0.056	0.084
A_75_P01100869		2	791291	0	1	0.184	0.068
A_75_P01100932		2	791974	0	1	0.114	0.188
A_75_P01100997		2	792609	0	1	0.126	0.26
A_75_P01101060		2	793335	0	1	0.084	0.302
A_75_P01101144		2	794196	0	1	0.016	0.258
A_75_P01101244		2	795222	0	1	-0.212	0.06
A_75_P01101361		2	796407	0	1	-0.112	-0.03
A_75_P01101438		2	797139	0	1	-0.014	-0.03
A_75_P01101513		2	797903	0	1	0.018	-0.06
A_75_P01101610		2	798832	0	1	0.06	-0.102
A_75_P01101715		2	799905	0	1	0.248	0.1
A_75_P01101746		2	800225	0	1	0.368	0.17
A_75_P01101811		2	800872	0	1	0.32	0.186
A_75_P01101907		2	801855	0	1	0.5	0.398
A_75_P01102012		2	802934	0	1	0.468	0.476
A_75_P01102091		2	803689	0	1	0.506	0.58
A_75_P01102174		2	804601	0	1	0.415	0.58
A_75_P01102543		2	808296	0	1	0.673333	0.75
A_75_P01103118		3	1147	0	1	0.17	0.146667
A_75_P01103195		3	1930	0	1	0.1375	0.19
A_75_P01103251		3	2502	0	1	0.082	0.114
A_75_P01103334		3	3347	0	1	-0.142	-0.034
A_75_P01103421		3	4294	0	1	-0.222	-0.058
A_75_P01103535		3	5386	1	1.10598	-0.358	-0.3
A_75_P01103542		3	5444	1	1.10598	-0.652	-0.536
A_75_P01103837		3	8317	1	1.10598	-0.608	-0.45
A_75_P01103926		3	9230	1	1.10598	-0.462	-0.598
A_75_P01104398		3	13987	1	1.10598	-0.352	-0.556
A_75_P01104456		3	14595	1	1.10598	-0.218	-0.31
A_75_P01104542		3	15480	1	1.10598	-0.028	-0.23
A_75_P01104648		3	16495	1	1.10598	-0.06	-0.216
A_75_P01104721		3	17226	0	1	-0.09	0.06
A_75_P01104812		3	18101	0	1	-0.354	-0.196
A_75_P01104893		3	18949	0	1	-0.282	-0.202
A_75_P01104994		3	19945	0	1	-0.254	-0.262
A_75_P01105099		3	20998	0	1	-0.314	-0.27
A_75_P01105190		3	21907	0	1	-0.244	-0.194
A_75_P01105209		3	22093	0	1	0.062	0.068
A_75_P01105282		3	22853	0	1	-0.082	0.084
A_75_P01105363		3	23680	0	1	0.068	0.24
A_75_P01105444		3	24565	0	1	0.008	0.092
A_75_P01105533		3	25458	0	1	0.1	0.072
A_75_P01105592		3	26066	0	1	0.076	0.104
A_75_P01105791		3	28043	0	1	0.146	0.048
A_75_P01105871		3	28882	0	1	-0.026	0.134
A_75_P01105971		3	29841	0	1	-0.074	0.176
A_75_P01106034		3	30473	0	1	-0.116	0.202
A_75_P01106091		3	31079	0	1	-0.248	0.114
A_75_P01106181		3	32012	0	1	-0.24	0.084
A_75_P01106209		3	32290	0	1	-0.102	-0.0075
A_75_P01106283		3	33069	0	1	-0.042	-0.005
A_75_P01106401		3	34211	0	1	-0.132	-0.145
A_75_P01106486		3	35074	0	1	-0.058	-0.1625
A_75_P01106570		3	35887	0	1	-0.094	-0.1575
A_75_P01106643		3	36621	0	1	-0.158	-0.218
A_75_P01106718		3	37398	0	1	-0.18	-0.184
A_75_P01106826		3	38503	0	1	-0.416	-0.222
A_75_P01106896		3	39213	0	1	-0.588	-0.192
A_75_P01106967		3	39932	0	1	-0.698	-0.174
A_75_P01107055		3	40855	0	1	-0.644	-0.042
A_75_P01107114		3	41451	0	1	-0.4	0.016
A_75_P01107180		3	42128	0	1	-0.11	0.15
A_75_P01107199		3	42323	0	1	-0.17	-0.178
A_75_P01107288		3	43182	0	1	-0.038	-0.168
A_75_P01107369		3	44000	0	1	-0.04	-0.158
A_75_P01107474		3	44997	0	1	-0.292	-0.294
A_75_P01107577		3	45992	0	1	-0.3	-0.28
A_75_P01107662		3	46845	0	1	-0.038	0.006
A_75_P01107732		3	47540	0	1	-0.042	-0.002
A_75_P01107795		3	48155	0	1	-0.254	-0.036
A_75_P01107859		3	48792	0	1	0.03	0.142
A_75_P01107928		3	49523	0	1	-0.142	0.022
A_75_P01107990		3	50205	0	1	-0.422	-0.112
A_75_P01108079		3	51111	0	1	-0.364	-0.042
A_75_P01108161		3	51975	0	1	-0.27	-0.116
A_75_P01108196		3	52334	0	1	-0.4	-0.194
A_75_P01108243		3	52814	0	1	-0.428	-0.188
A_75_P01108328		3	53720	0	1	-0.182	-0.046
A_75_P01108405		3	54512	0	1	-0.188	-0.142
A_75_P01108466		3	55163	0	1	-0.136	-0.018
A_75_P01108539		3	55895	0	1	-0.06	0.05
A_75_P01108607		3	56575	0	1	0.182	0.148
A_75_P01108686		3	57326	0	1	0.252	0.176
A_75_P01108775		3	58230	0	1	-0.216	-0.076
A_75_P01108841		3	58915	0	1	-0.19	-0.03
A_75_P01108910		3	59689	0	1	-0.346	-0.042
A_75_P01108982		3	60418	0	1	-0.452	-0.164
A_75_P01109091		3	61567	0	1	-0.468	-0.186
A_75_P01109109		3	61750	0	1	-0.006	0.108
A_75_P01109170		3	62421	0	1	0.012	-0.014
A_75_P01109250		3	63248	0	1	-0.03	-0.132
A_75_P01109317		3	63956	0	1	0.054	-0.002
A_75_P01109420		3	64924	0	1	-0.004	0.01
A_75_P01109504		3	65769	0	1	-0.078	-0.026
A_75_P01109588		3	66615	0	1	-0.076	0.018
A_75_P01109656		3	67323	0	1	0.068	0.168
A_75_P01109744		3	68259	0	1	0.108	0.18
A_75_P01109808		3	68948	0	1	-0.104	0.028
A_75_P01109878		3	69687	0	1	-0.278	0.006
A_75_P01109947		3	70418	0	1	-0.452	-0.154
A_75_P01110016		3	71144	0	1	-0.42	-0.196
A_75_P01110043		3	71433	0	1	-0.634	-0.284
A_75_P01110105		3	72030	0	1	-0.406	-0.138
A_75_P01110189		3	72902	0	1	-0.148	-0.078
A_75_P01110290		3	73935	0	1	0.058	0.108
A_75_P01110405		3	75142	0	1	-0.126	-0.126
A_75_P01110463		3	75758	0	1	-0.002	-0.15
A_75_P01110547		3	76615	0	1	-0.11	-0.1425
A_75_P01110619		3	77337	0	1	-0.272	-0.1825
A_75_P01110696		3	78129	0	1	-0.246	-0.2275
A_75_P01110744		3	78652	0	1	-0.304	-0.0875
A_75_P01110809		3	79361	0	1	-0.326	-0.028
A_75_P01110893		3	80218	0	1	-0.4	-0.076
A_75_P01110974		3	80977	0	1	-0.304	-0.048
A_75_P01110997		3	81214	0	1	-0.336	-0.008
A_75_P01111044		3	81721	0	1	-0.1	0.038
A_75_P01111141		3	82646	0	1	0.018	0.046
A_75_P01111231		3	83515	0	1	0.294	0.144
A_75_P01111306		3	84263	0	1	0.182	-0.036
A_75_P01111937		3	90734	0	1	0.016	-0.338
A_75_P01112020		3	91614	0	1	-0.036	-0.266
A_75_P01112112		3	92609	0	1	-0.054	-0.224
A_75_P01112181		3	93305	0	1	-0.258	-0.3
A_75_P01112272		3	94234	0	1	-0.298	-0.128
A_75_P01112374		3	95241	0	1	-0.238	0.148
A_75_P01112470		3	96134	0	1	-0.178	0.142
A_75_P01112545		3	96924	0	1	-0.208	0.098
A_75_P01112567		3	97133	0	1	-0.218	0.09
A_75_P01112642		3	97849	0	1	-0.148	0.088
A_75_P01112734		3	98821	0	1	-0.112	0.038
A_75_P01112801		3	99574	0	1	-0.2	0.028
A_75_P01112853		3	100139	0	1	-0.218	0.034
A_75_P01112918		3	100810	0	1	-0.086	0.062
A_75_P01112994		3	101620	0	1	-0.016	0.052
A_75_P01113077		3	102488	0	1	-0.09	-0.062
A_75_P01113169		3	103361	0	1	-0.058	-0.062
A_75_P01113216		3	103865	0	1	-0.196	-0.112
A_75_P01113309		3	104848	0	1	-0.19	-0.108
A_75_P01113379		3	105615	0	1	-0.248	-0.098
A_75_P01113457		3	106518	0	1	-0.326	-0.156
A_75_P01113479		3	106724	0	1	-0.44	-0.28
A_75_P01113522		3	107177	0	1	-0.534	-0.388
A_75_P01113624		3	108187	0	1	-0.51	-0.322
A_75_P01113697		3	108925	0	1	-0.352	-0.314
A_75_P01113804		3	109988	0	1	-0.042	-0.08
A_75_P01113880		3	110763	0	1	0.106	-0.002
A_75_P01113955		3	111492	0	1	0.374	0.112
A_75_P01114033		3	112264	0	1	0.22	0.052
A_75_P01114106		3	112969	0	1	1.66533e-17	0.012
A_75_P01114172		3	113652	0	1	-0.1625	-0.312
A_75_P01114244		3	114378	0	1	-0.1875	-0.282
A_75_P01114316		3	115089	0	1	-0.2175	-0.25
A_75_P01114382		3	115758	0	1	-0.1	-0.264
A_75_P01114413		3	116072	0	1	0.0675	-0.16
A_75_P01114490		3	116815	0	1	0.15	0.178
A_75_P01114546		3	117391	0	1	0.036	0.042
A_75_P01114623		3	118244	0	1	-0.022	-0.056
A_75_P01114717		3	119153	0	1	-0.044	-0.048
A_75_P01114786		3	119851	0	1	0.056	-0.098
A_75_P01114843		3	120442	0	1	0.036	-0.114
A_75_P01114910		3	121095	0	1	0.132	-0.022
A_75_P01115013		3	122159	0	1	0.124	0.088
A_75_P01115158		3	123705	0	1	0.196	0.086
A_75_P01115259		3	124738	0	1	0.066	0.034
A_75_P01115349		3	125685	0	1	-0.106	-0.014
A_75_P01115398		3	126201	0	1	-0.246	0.032
A_75_P01115459		3	126756	0	1	-0.366	-0.154
A_75_P01115519		3	127381	0	1	-0.37	-0.092
A_75_P01115580		3	127991	0	1	-0.334	-0.11
A_75_P01115705		3	129186	0	1	-0.2975	-0.302
A_75_P01115780		3	129861	0	1	-0.5125	-0.486
A_75_P01115850		3	130591	0	1	-0.5025	-0.354
A_75_P01115938		3	131443	0	1	-0.5575	-0.424
A_75_P01115999		3	132071	0	1	-0.605	-0.412
A_75_P01116081		3	132942	0	1	-0.568	-0.256
A_75_P01116177		3	133917	0	1	-0.576	-0.128
A_75_P01116257		3	134730	0	1	-0.398	-0.154
A_75_P01116330		3	135447	0	1	-0.358	-0.184
A_75_P01116348		3	135630	0	1	-0.262	-0.114
A_75_P01116400		3	136178	0	1	-0.066	0.006
A_75_P01116483		3	136963	0	1	0.314	0.048
A_75_P01116582		3	137957	0	1	0.322	0.11
A_75_P01116653		3	138683	0	1	0.192	0.128
A_75_P01116726		3	139416	0	1	0.012	-0.114
A_75_P01116814		3	140293	0	1	-0.41	-0.408
A_75_P01116888		3	141007	1	1.10598	-0.684	-0.36
A_75_P01116963		3	141759	1	1.10598	-0.9	-0.398
A_75_P01117045		3	142584	1	1.10598	-0.916	-0.318
A_75_P01117131		3	143416	1	1.10598	-0.736	-0.106
A_75_P01117200		3	144122	1	1.10598	-0.352	0.13
A_75_P01117287		3	145005	1	1.10598	-0.132	0.1225
A_75_P01117326		3	145410	1	1.10598	0.056	0.1925
A_75_P01117398		3	146164	1	1.10598	0.094	0.0725
A_75_P01117477		3	146928	2	0.173737	-0.128	0.05
A_75_P01117565		3	147834	2	0.173737	-0.664	-0.3
A_75_P01117624		3	148437	3	0.00643189	-0.974	-0.77
A_75_P01117712		3	149296	3	0.00643189	-1.235	-1.202
A_75_P01117798		3	150149	3	0.00643189	-0.7	-0.78
A_75_P01117873		3	150927	3	0.00643189	-0.095	-0.332
A_75_P01117974		3	151975	4	0.00013404	0.5525	0.324
A_75_P01118051		3	152726	4	0.00013404	0.815	0.83
A_75_P01118123		3	153447	4	0.00013404	0.906	1.488
A_75_P01118200		3	154253	4	0.00013404	0.832	1.468
A_75_P01118270		3	154981	4	0.00013404	0.846	1.382
A_75_P01118293		3	155203	4	0.00013404	1.114	1.458
A_75_P01118340		3	155689	4	0.00013404	1.515	1.194
A_75_P01118413		3	156421	4	0.00013404	1.4575	1.164
A_75_P01118476		3	157049	4	0.00013404	1.4175	1.062
A_75_P01118553		3	157799	4	0.00013404	1.36	1.064
A_75_P01118627		3	158518	4	0.00013404	1.3525	0.932
A_75_P01118713		3	159393	4	0.00013404	1.29	1.418
A_75_P01118790		3	160179	4	0.00013404	1.386	1.49
A_75_P01118854		3	160856	4	0.00013404	1.572	1.622
A_75_P01118940		3	161748	4	0.00013404	1.55	1.69
A_75_P01119030		3	162624	4	0.00013404	1.546	1.738
A_75_P01119115		3	163425	4	0.00013404	1.602	1.762
A_75_P01119238		3	164722	4	0.00013404	1.642	1.802
A_75_P01119265		3	164984	4	0.00013404	1.026	1.35
A_75_P01119321		3	165572	4	0.00013404	1.112	1.238
A_75_P01119390		3	166299	4	0.00013404	0.592	1.052
A_75_P01119503		3	167446	4	0.00013404	0.358	0.788
A_75_P01119580		3	168195	4	0.00013404	-0.008	0.39
A_75_P01119654		3	168899	4	0.00013404	0.244	0.39
A_75_P01119754		3	169881	3	0.00643189	-0.162	0.136
A_75_P01119820		3	170552	3	0.00643189	0.062	0.088
A_75_P01119907		3	171396	3	0.00643189	-0.086	0.022
A_75_P01119981		3	172136	2	0.173737	0.002	0.024
A_75_P01120070		3	173007	1	1.10598	-0.052	0.102
A_75_P01120137		3	173691	1	1.10598	0.114	0.03
A_75_P01120245		3	174790	0	1	-0.026	-0.32
A_75_P01120264		3	174994	0	1	0.078	-0.344
A_75_P01120332		3	175642	0	1	0.13	-0.196
A_75_P01120411		3	176424	0	1	0.036	-0.174
A_75_P01120500		3	177284	0	1	-0.258	-0.134
A_75_P01120570		3	178005	0	1	-0.072	0.234
A_75_P01120660		3	178907	0	1	-0.124	0.142
A_75_P01120746		3	179713	0	1	-0.194	0.102
A_75_P01120829		3	180601	0	1	-0.194	0.098
A_75_P01120932		3	181586	0	1	-0.026	0.102
A_75_P01121020		3	182478	0	1	-0.222	-0.092
A_75_P01121120		3	183445	0	1	-0.332	-0.148
A_75_P01121218		3	184430	0	1	-0.36	-0.304
A_75_P01121284		3	185128	0	1	-0.362	-0.36
A_75_P01121307		3	185354	0	1	-0.434	-0.404
A_75_P01121347		3	185761	0	1	-0.34	-0.272
A_75_P01121414		3	186411	0	1	-0.22	-0.218
A_75_P01121481		3	187102	0	1	-0.162	-0.172
A_75_P01121570		3	187956	0	1	-0.316	-0.33
A_75_P01121657		3	188834	0	1	-0.228	-0.32
A_75_P01121768		3	189876	0	1	-0.176	-0.292
A_75_P01121831		3	190550	0	1	-0.116	-0.174
A_75_P01121936		3	191581	0	1	-0.432	-0.102
A_75_P01122022		3	192488	0	1	-0.316	0.028
A_75_P01122083		3	193118	0	1	-0.26	0.116
A_75_P01122184		3	194189	0	1	-0.31	0.038
A_75_P01122274		3	195075	0	1	-0.446	0.002
A_75_P01122326		3	195603	0	1	-0.262	-0.1
A_75_P01122378		3	196120	0	1	-0.3	-0.052
A_75_P01122463		3	197046	0	1	-0.326	-0.052
A_75_P01122537		3	197850	0	1	-0.676	-0.346
A_75_P01122615		3	198635	0	1	-0.528	-0.252
A_75_P01122896		3	201595	0	1	-0.66	-0.368
A_75_P01122987		3	202553	0	1	-0.44	-0.308
A_75_P01123055		3	203297	0	1	-0.57	-0.444
A_75_P01123116		3	203920	0	1	-0.204	-0.16
A_75_P01123183		3	204589	0	1	-0.216	-0.214
A_75_P01123268		3	205413	0	1	-0.028	0.008
A_75_P01123330		3	206006	0	1	-0.066	0.014
A_75_P01123399		3	206671	0	1	-0.274	-0.108
A_75_P01123432		3	206992	0	1	-0.416	-0.17
A_75_P01123488		3	207565	0	1	-0.556	-0.292
A_75_P01123579		3	208401	0	1	-0.618	-0.398
A_75_P01123640		3	209095	0	1	-0.624	-0.45
A_75_P01123722		3	209945	0	1	-0.284	-0.25
A_75_P01123798		3	210758	0	1	-0.126	-0.18
A_75_P01123852		3	211374	0	1	-0.198	-0.218
A_75_P01123948		3	212459	0	1	-0.08	-0.164
A_75_P01124047		3	213501	0	1	-0.106	-0.162
A_75_P01124114		3	214214	0	1	-0.082	-0.192
A_75_P01124194		3	215085	0	1	-0.03	-0.12
A_75_P01124285		3	216025	0	1	0.29	0.084
A_75_P01124456		3	217707	0	1	0.026	-0.012
A_75_P01124503		3	218158	0	1	0.026	0.07
A_75_P01124565		3	218738	0	1	-0.208	0.04
A_75_P01124651		3	219570	0	1	-0.316	-0.002
A_75_P01124719		3	220274	0	1	-0.414	-0.052
A_75_P01124823		3	221332	0	1	-0.26	-0.138
A_75_P01124926		3	222452	0	1	-0.26	-0.236
A_75_P01125016		3	223367	0	1	0.065	-0.154
A_75_P01125104		3	224298	0	1	0.0075	-0.222
A_75_P01125172		3	225021	0	1	-0.0325	-0.304
A_75_P01125246		3	225789	0	1	-0.064	-0.098
A_75_P01125342		3	226789	0	1	-0.184	-0.146
A_75_P01125418		3	227616	0	1	-0.272	-0.21
A_75_P01125441		3	227846	0	1	-0.082	-0.142
A_75_P01125480		3	228219	0	1	-0.082	-0.052
A_75_P01125555		3	228977	0	1	-0.044	-0.102
A_75_P01125616		3	229626	0	1	0.064	-0.048
A_75_P01125720		3	230689	0	1	-0.142	-0.252
A_75_P01125777		3	231315	0	1	-0.148	-0.292
A_75_P01125859		3	232151	0	1	-0.096	-0.196
A_75_P01125972		3	233253	0	1	-0.038	-0.102
A_75_P01126043		3	233983	0	1	-0.072	-0.07
A_75_P01126103		3	234625	0	1	0.02	-0.018
A_75_P01126202		3	235603	0	1	-0.222	-0.188
A_75_P01126267		3	236277	0	1	-0.36	-0.458
A_75_P01126345		3	237052	0	1	-0.458	-0.562
A_75_P01126367		3	237271	0	1	-0.382	-0.578
A_75_P01126449		3	238095	0	1	-0.248	-0.368
A_75_P01126510		3	238747	0	1	-0.04	-0.1
A_75_P01126597		3	239622	0	1	0.05	0.074
A_75_P01126669		3	240337	0	1	-0.072	-0.05
A_75_P01126786		3	241549	0	1	-0.312	-0.132
A_75_P01126851		3	242205	0	1	-0.362	-0.138
A_75_P01126942		3	243156	0	1	-0.338	-0.188
A_75_P01127025		3	244003	0	1	-0.498	-0.32
A_75_P01127094		3	244715	0	1	-0.444	-0.24
A_75_P01127180		3	245611	0	1	-0.254	-0.184
A_75_P01127259		3	246447	0	1	-0.156	-0.142
A_75_P01127344		3	247342	0	1	-0.2	-0.062
A_75_P01127376		3	247663	0	1	-0.182	0.008
A_75_P01127421		3	248137	0	1	-0.072	0.118
A_75_P01127481		3	248728	0	1	-0.322	-0.016
A_75_P01127550		3	249421	0	1	-0.51	-0.114
A_75_P01127602		3	249998	0	1	-0.448	-0.198
A_75_P01127678		3	250707	0	1	-0.358	-0.09
A_75_P01127776		3	251738	0	1	-0.35	-0.116
A_75_P01127851		3	252460	0	1	-0.068	0.048
A_75_P01127922		3	253214	0	1	-0.086	-0.052
A_75_P01127975		3	253765	0	1	-0.142	-0.006
A_75_P01128048		3	254558	0	1	-0.156	-9.71445e-18
A_75_P01128140		3	255503	0	1	-0.066	0.026
A_75_P01128223		3	256311	0	1	-0.176	-0.014
A_75_P01128242		3	256503	0	1	-0.076	-0.018
A_75_P01128275		3	256830	0	1	-0.082	0.022
A_75_P01128351		3	257590	0	1	0.03	0.068
A_75_P01128450		3	258557	0	1	0.026	0.096
A_75_P01128514		3	259222	0	1	0.104	0.1
A_75_P01128584		3	259898	0	1	0.11	0.244
A_75_P01128658		3	260668	0	1	0.124	0.26
A_75_P01128732		3	261406	0	1	0.232	0.212
A_75_P01128822		3	262308	0	1	0.196	0.172
A_75_P01128895		3	262989	0	1	0.188	0.192
A_75_P01128972		3	263818	0	1	0.232	0.16
A_75_P01129052		3	264708	0	1	0.132	-0.014
A_75_P01129115		3	265361	0	1	-0.06	-0.01
A_75_P01129135		3	265610	0	1	-0.368	-0.03
A_75_P01129189		3	266172	0	1	-0.268	-0.008
A_75_P01129259		3	266880	0	1	-0.32	0.008
A_75_P01129359		3	267828	0	1	-0.182	0.124
A_75_P01129461		3	268875	0	1	-0.224	0.004
A_75_P01129554		3	269854	0	1	5.55112e-18	0.108
A_75_P01129653		3	270847	0	1	-0.188	0.046
A_75_P01129718		3	271527	0	1	-0.04	0.1
A_75_P01129786		3	272188	0	1	-0.152	0.008
A_75_P01129863		3	273028	0	1	-0.26	-0.022
A_75_P01129940		3	273753	0	1	-0.316	-0.192
A_75_P01130000		3	274330	0	1	-0.174	-0.15
A_75_P01130062		3	274964	0	1	-0.522	-0.444
A_75_P01130076		3	275135	0	1	-0.414	-0.352
A_75_P01130114		3	275526	0	1	-0.288	-0.254
A_75_P01130196		3	276336	0	1	-0.09	-0.018
A_75_P01130300		3	277366	0	1	-0.192	-0.16
A_75_P01130378		3	278134	0	1	-0.05	0.062
A_75_P01130454		3	278895	0	1	-0.108	-0.02
A_75_P01130559		3	279889	0	1	-0.42	-0.152
A_75_P01130622		3	280506	0	1	-0.564	-0.322
A_75_P01130713		3	281408	0	1	-0.516	-0.202
A_75_P01130800		3	282223	0	1	-0.372	-0.168
A_75_P01130883		3	283059	0	1	-0.284	-0.078
A_75_P01130963		3	283802	0	1	-0.11	-0.076
A_75_P01131053		3	284737	0	1	-0.042	0.002
A_75_P01131077		3	284949	0	1	-0.008	0.112
A_75_P01131109		3	285271	0	1	-0.0625	-0.068
A_75_P01131188		3	286057	0	1	-0.0475	-0.102
A_75_P01131254		3	286732	0	1	0.3025	0.112
A_75_P01131351		3	287696	0	1	0.23	0.034
A_75_P01131434		3	288557	0	1	0.3275	-0.022
A_75_P01131528		3	289495	0	1	0.26	0.174
A_75_P01131618		3	290420	0	1	-0.124	0.182
A_75_P01131694		3	291221	0	1	-0.406	0.116
A_75_P01131796		3	292244	0	1	-0.434	0.074
A_75_P01131870		3	292992	0	1	-0.422	0.164
A_75_P01131981		3	294177	0	1	-0.362	0.276
A_75_P01132071		3	295089	0	1	-0.09	0.278
A_75_P01132104		3	295391	0	1	0.112	0.324
A_75_P01132154		3	295892	0	1	0.068	0.294
A_75_P01132265		3	297000	0	1	0.158	0.318
A_75_P01132335		3	297649	0	1	0.032	0.196
A_75_P01132407		3	298383	0	1	0.012	0.202
A_75_P01132465		3	298988	0	1	0.18	0.268
A_75_P01132528		3	299637	0	1	0.324	0.394
A_75_P01132626		3	300659	0	1	0.138	0.244
A_75_P01132686		3	301317	0	1	0.118	0.312
A_75_P01132753		3	302030	0	1	0.058	0.248
A_75_P01132839		3	302842	0	1	-0.136	0.198
A_75_P01132945		3	303900	0	1	-0.166	0.134
A_75_P01133031		3	304795	0	1	-0.162	0.136
A_75_P01133171		3	306266	0	1	-0.374	-0.206
A_75_P01133251		3	307066	0	1	-0.238	-0.154
A_75_P01133497		3	309480	0	1	-0.156	-0.26
A_75_P01133601		3	310548	0	1	-0.296	-0.322
A_75_P01133745		3	311951	0	1	-0.266	-0.308
A_75_P01133819		3	312708	0	1	0.06	-0.02
A_75_P01133879		3	313322	0	1	0.04	-0.024
A_75_P01133934		3	313934	0	1	-0.0025	-0.005
A_75_P01134023		3	314866	0	1	0.186667	0.136667
A_75_P01134403		4	2228	0	1	-0.13	0.0733333
A_75_P01135939		4	17868	0	1	0.0225	0.1075
A_75_P01136059		4	19088	0	1	0.038	0.074
A_75_P01136087		4	19376	0	1	0.186	0.13
A_75_P01136128		4	19782	0	1	0.206	0.072
A_75_P01136218		4	20674	0	1	-0.03	-0.132
A_75_P01136290		4	21444	0	1	-0.002	-0.166
A_75_P01136389		4	22446	0	1	0.09	-0.082
A_75_P01136474		4	23309	0	1	-0.008	-0.12
A_75_P01136525		4	23847	0	1	0.004	-0.202
A_75_P01136593		4	24502	0	1	0.32	0.172
A_75_P01136680		4	25328	0	1	-0.092	0.19
A_75_P01136777		4	26391	0	1	-0.302	0.116
A_75_P01136871		4	27343	0	1	-0.27	0.128
A_75_P01136967		4	28291	0	1	-0.31	0.218
A_75_P01137042		4	29035	0	1	-0.41	0.016
A_75_P01137069		4	29307	0	1	-0.17	-0.01
A_75_P01137120		4	29840	0	1	2.08167e-18	0.04
A_75_P01137189		4	30518	0	1	-0.052	0.014
A_75_P01137293		4	31590	0	1	-0.168	-0.096
A_75_P01137386		4	32521	0	1	-0.088	-0.048
A_75_P01137478		4	33464	0	1	-0.096	-0.002
A_75_P01137558		4	34245	0	1	-0.152	0.018
A_75_P01137620		4	34817	0	1	-0.222	-0.166
A_75_P01137724		4	35889	0	1	-0.158	-0.064
A_75_P01137798		4	36640	0	1	-0.088	0.024
A_75_P01137864		4	37290	0	1	9.71445e-18	0.038
A_75_P01137954		4	38190	0	1	-0.186	-0.302
A_75_P01138023		4	38857	0	1	0.04	-0.074
A_75_P01138046		4	39086	0	1	0.032	-0.018
A_75_P01138087		4	39489	0	1	0.058	-0.042
A_75_P01138142		4	40056	0	1	-0.126	-0.078
A_75_P01138217		4	40831	0	1	0.102	0.248
A_75_P01138308		4	41836	0	1	0.076	0.212
A_75_P01138382		4	42644	0	1	-0.066	0.108
A_75_P01138438		4	43245	0	1	-0.438	-0.096
A_75_P01138524		4	44172	0	1	-0.176	-0.03
A_75_P01138703		4	46033	0	1	-0.146	0.056
A_75_P01138800		4	47059	0	1	-0.158	0.096
A_75_P01138861		4	47684	0	1	0.064	0.11
A_75_P01138940		4	48477	0	1	0.338	0.26
A_75_P01139017		4	49208	0	1	0.09	0.18
A_75_P01139042		4	49454	0	1	-0.026	0.052
A_75_P01139091		4	49957	0	1	-0.116	-0.03
A_75_P01139174		4	50789	0	1	-0.27	-0.048
A_75_P01139236		4	51430	0	1	-0.454	-0.05
A_75_P01139290		4	51953	0	1	-0.254	0.018
A_75_P01139364		4	52691	0	1	-0.218	0.032
A_75_P01139446		4	53510	0	1	-0.474	0.07
A_75_P01139536		4	54400	0	1	-0.546	0.07
A_75_P01139633		4	55376	0	1	-0.378	0.068
A_75_P01139712		4	56109	0	1	-0.464	-0.008
A_75_P01139817		4	57126	1	1.10598	-0.812	-0.182
A_75_P01139903		4	58046	1	1.10598	-0.656	-0.216
A_75_P01139977		4	58776	0	1	-0.462	-0.112
A_75_P01140009		4	59102	0	1	-0.536	-0.132
A_75_P01140069		4	59725	0	1	-0.47	-0.126
A_75_P01140165		4	60743	0	1	-0.28	-0.22
A_75_P01140240		4	61501	0	1	-0.094	-0.102
A_75_P01140302		4	62121	0	1	-0.084	-0.15
A_75_P01140391		4	63000	0	1	-0.202	-0.116
A_75_P01140474		4	63860	0	1	-0.3	-0.158
A_75_P01140542		4	64519	0	1	-0.242	0.06
A_75_P01140620		4	65259	0	1	-0.23	0.042
A_75_P01140703		4	66102	0	1	-0.458	-0.094
A_75_P01140786		4	66952	0	1	-0.326	-0.162
A_75_P01140864		4	67799	0	1	-0.2	-0.136
A_75_P01140947		4	68628	0	1	-0.024	-0.034
A_75_P01140963		4	68801	0	1	-0.096	-0.018
A_75_P01141010		4	69275	0	1	0.086	0.13
A_75_P01141102		4	70214	0	1	0.05	6.93889e-18
A_75_P01141179		4	70988	0	1	0.062	0.122
A_75_P01141252		4	71714	0	1	-0.184	-0.116
A_75_P01141321		4	72407	0	1	-0.112	-0.19
A_75_P01141426		4	73482	0	1	-0.152	-0.272
A_75_P01141512		4	74354	0	1	-0.004	-0.09
A_75_P01141590		4	75152	0	1	-0.086	-0.216
A_75_P01141659		4	75861	0	1	0.1	-0.1
A_75_P01141761		4	76890	0	1	0.13	4.16334e-18
A_75_P01141841		4	77712	0	1	0.096	-0.022
A_75_P01141914		4	78415	0	1	0.08	-0.034
A_75_P01141961		4	78887	0	1	-0.078	-0.124
A_75_P01142021		4	79453	0	1	-0.13	-0.1
A_75_P01142085		4	80100	0	1	-0.186	-0.2
A_75_P01142188		4	81140	0	1	-0.034	-0.1475
A_75_P01142281		4	82095	0	1	-0.164	-0.185
A_75_P01142373		4	83001	0	1	-0.178	-0.225
A_75_P01142456		4	83803	0	1	-0.07	-0.162
A_75_P01142544		4	84675	0	1	-0.284	-0.328
A_75_P01142609		4	85353	0	1	-0.528	-0.47
A_75_P01142697		4	86239	0	1	-0.62	-0.436
A_75_P01142760		4	86853	0	1	-0.378	-0.256
A_75_P01142861		4	87860	0	1	-0.458	-0.184
A_75_P01142933		4	88614	0	1	-0.402	-0.21
A_75_P01142965		4	88921	0	1	-0.29	-0.43
A_75_P01143021		4	89516	0	1	-0.055	-0.448
A_75_P01143104		4	90330	0	1	-0.025	-0.422
A_75_P01143185		4	91139	0	1	-0.0675	-0.518
A_75_P01143264		4	91955	0	1	0.1325	-0.358
A_75_P01143331		4	92592	0	1	0.132	0.056
A_75_P01143438		4	93676	0	1	0.234	0.158
A_75_P01143551		4	94780	0	1	0.13	0.04
A_75_P01143635		4	95606	0	1	0.212	-5.55112e-18
A_75_P01143715		4	96423	0	1	0.176	0.066
A_75_P01143786		4	97135	0	1	0.28	0.004
A_75_P01143867		4	97949	0	1	0.196	-0.062
A_75_P01143925		4	98526	0	1	0.178	-0.056
A_75_P01143944		4	98696	0	1	0.176	-0.016
A_75_P01143987		4	99147	0	1	0.016	-0.0625
A_75_P01144050		4	99790	0	1	0.014	-0.055
A_75_P01144128		4	100558	0	1	-0.084	-0.1325
A_75_P01144211		4	101397	0	1	-0.2	-0.2875
A_75_P01144372		4	102999	0	1	-0.204	-0.1825
A_75_P01144476		4	104068	0	1	-0.156	-0.256
A_75_P01144539		4	104698	0	1	-0.27	-0.228
A_75_P01144604		4	105421	0	1	-0.186	-0.248
A_75_P01144678		4	106188	0	1	-0.026	-0.066
A_75_P01144747		4	106852	0	1	-0.036	-0.052
A_75_P01144851		4	107944	0	1	-0.018	0.07
A_75_P01144869		4	108178	0	1	-0.032	0.03
A_75_P01144905		4	108527	0	1	-0.058	0.004
A_75_P01144998		4	109538	0	1	-0.16	-0.078
A_75_P01145045		4	110040	0	1	-0.312	-0.39
A_75_P01145118		4	110834	0	1	-0.32	-0.426
A_75_P01145208		4	111795	0	1	-0.42	-0.396
A_75_P01145272		4	112437	0	1	-0.518	-0.288
A_75_P01145337		4	113080	0	1	-0.512	-0.248
A_75_P01145419		4	113920	0	1	-0.318	-0.034
A_75_P01145474		4	114461	0	1	-0.252	-0.072
A_75_P01145536		4	115072	0	1	-0.208	-0.01
A_75_P01145628		4	115976	0	1	-0.398	-0.144
A_75_P01145713		4	116807	0	1	-0.374	-0.086
A_75_P01145739		4	117095	0	1	-0.636	-0.02
A_75_P01145789		4	117592	0	1	-0.664	-0.004
A_75_P01145875		4	118524	0	1	-0.574	-0.066
A_75_P01145981		4	119537	0	1	-0.332	0.116
A_75_P01146072		4	120449	0	1	-0.356	-0.048
A_75_P01146162		4	121303	0	1	-0.036	-0.132
A_75_P01146248		4	122167	0	1	0.0125	-0.378
A_75_P01146327		4	122902	0	1	0.035	-0.36
A_75_P01146413		4	123800	0	1	0.04	-0.498
A_75_P01146528		4	124976	0	1	0.1875	-0.356
A_75_P01146607		4	125741	0	1	-0.13	-0.37
A_75_P01146659		4	126274	0	1	-0.028	-0.014
A_75_P01146789		4	127574	0	1	-0.014	-0.002
A_75_P01146820		4	127906	0	1	0.106	0.094
A_75_P01146883		4	128563	0	1	0.036	0.112
A_75_P01146953		4	129310	0	1	0.146	0.1875
A_75_P01147034		4	130104	0	1	0.082	0.135
A_75_P01147092		4	130727	0	1	-0.034	-0.0175
A_75_P01147170		4	131512	0	1	-0.262	-0.16
A_75_P01147230		4	132108	0	1	-0.408	-0.395
A_75_P01147296		4	132742	0	1	-0.51	-0.324
A_75_P01147394		4	133690	0	1	-0.522	-0.412
A_75_P01147533		4	135137	0	1	-0.426	-0.31
A_75_P01147593		4	135765	0	1	-0.176	-0.13
A_75_P01147669		4	136556	0	1	-0.08	-0.136
A_75_P01147758		4	137471	0	1	0.012	-0.062
A_75_P01147781		4	137708	0	1	0.032	0.046
A_75_P01147837		4	138287	0	1	-0.228	-0.136
A_75_P01147910		4	139019	0	1	-0.21	-0.258
A_75_P01147962		4	139615	0	1	-0.096	-0.024
A_75_P01148021		4	140229	0	1	-0.114	-0.14
A_75_P01148124		4	141295	0	1	-0.126	-0.264
A_75_P01148212		4	142153	0	1	0.104	-0.112
A_75_P01148289		4	142946	0	1	0.046	-0.06
A_75_P01148380		4	143849	0	1	-0.03	-0.152
A_75_P01148448		4	144572	0	1	0.054	-0.104
A_75_P01148540		4	145534	0	1	-0.164	-0.196
A_75_P01148602		4	146127	0	1	-0.144	-0.194
A_75_P01148725		4	147375	0	1	-0.048	-0.182
A_75_P01148749		4	147611	0	1	-0.024	-0.208
A_75_P01148829		4	148457	0	1	-0.102	-0.222
A_75_P01148923		4	149493	0	1	0.16	-0.026
A_75_P01149025		4	150536	0	1	0.155	-0.23
A_75_P01149089		4	151163	0	1	0.02	-0.27
A_75_P01149150		4	151802	0	1	-0.1975	-0.454
A_75_P01149229		4	152589	0	1	-0.2625	-0.476
A_75_P01149329		4	153660	0	1	-0.2525	-0.492
A_75_P01149412		4	154509	0	1	-0.252	-0.236
A_75_P01149524		4	155570	0	1	-0.334	-0.132
A_75_P01149576		4	156125	0	1	-0.126	0.108
A_75_P01149664		4	156964	0	1	0.04	0.17
A_75_P01149758		4	157872	0	1	-0.12	0.146
A_75_P01149804		4	158353	0	1	-0.118	0.08
A_75_P01149840		4	158694	0	1	-0.062	0.012
A_75_P01149895		4	159284	0	1	-0.064	0.056
A_75_P01149955		4	159284	0	1	-0.258	0.002
A_75_P01150045		4	160818	0	1	-0.108	0.034
A_75_P01150137		4	161703	0	1	-0.075	-0.104
A_75_P01150230		4	162650	0	1	0.0325	-0.086
A_75_P01150324		4	163670	0	1	0.04	-0.124
A_75_P01150419		4	164603	0	1	0.03	-0.112
A_75_P01150512		4	165538	0	1	0.0125	-0.112
A_75_P01150575		4	166181	0	1	-0.194	0.042
A_75_P01150636		4	166769	0	1	-0.184	0.082
A_75_P01150714		4	167572	0	1	-0.104	0.096
A_75_P01150744		4	167845	0	1	-0.016	0.188
A_75_P01150795		4	168379	0	1	-0.152	0.024
A_75_P01150899		4	169363	0	1	-0.122	-0.08
A_75_P01150965		4	170049	0	1	-0.208	-0.232
A_75_P01151049		4	170913	0	1	-0.224	-0.248
A_75_P01151137		4	171788	0	1	-0.12	-0.354
A_75_P01151278		4	173136	0	1	0.052	-0.116
A_75_P01151345		4	173752	0	1	0.246	0.036
A_75_P01151404		4	174363	0	1	0.308	0.192
A_75_P01151488		4	175151	0	1	0.24	0.18
A_75_P01151551		4	175794	0	1	-0.012	0.2
A_75_P01151613		4	176438	0	1	-0.106	0.07
A_75_P01151710		4	177457	0	1	-0.19	0.048
A_75_P01151735		4	177694	0	1	-0.176	0.012
A_75_P01151819		4	178593	0	1	-0.284	0.028
A_75_P01151886		4	179250	0	1	-0.178	0.036
A_75_P01151936		4	179775	0	1	-0.274	-0.03
A_75_P01152014		4	180539	0	1	-0.22	-0.038
A_75_P01152114		4	181500	0	1	-0.472	-0.268
A_75_P01152181		4	182206	0	1	-0.366	-0.374
A_75_P01152232		4	182702	0	1	-0.264	-0.356
A_75_P01152308		4	183480	0	1	-0.064	-0.248
A_75_P01152408		4	184436	0	1	-0.184	-0.39
A_75_P01152488		4	185255	0	1	-0.136	-0.326
A_75_P01152562		4	185930	0	1	-0.148	-0.178
A_75_P01152642		4	186714	0	1	-0.164	-0.168
A_75_P01152675		4	187026	0	1	-0.21	-0.134
A_75_P01152724		4	187484	0	1	-0.208	-0.01
A_75_P01152802		4	188264	0	1	-0.008	0.114
A_75_P01152903		4	189287	0	1	-0.086	0.01
A_75_P01152972		4	190006	0	1	-0.052	-0.03
A_75_P01153058		4	190883	0	1	-0.082	-0.09
A_75_P01153137		4	191696	0	1	0.108	-0.06
A_75_P01153203		4	192381	0	1	0.094	-0.092
A_75_P01153335		4	193751	0	1	0.215	-0.302
A_75_P01153413		4	194501	0	1	0.0425	-0.388
A_75_P01153471		4	195080	0	1	-0.14	-0.55
A_75_P01153529		4	195681	0	1	-0.105	-0.53
A_75_P01153552		4	195910	0	1	-0.2425	-0.536
A_75_P01153595		4	196360	0	1	-0.18	-0.196
A_75_P01153689		4	197268	0	1	-0.048	-0.078
A_75_P01153749		4	197870	0	1	0.124	0.062
A_75_P01153833		4	198717	0	1	0.076	0.026
A_75_P01153905		4	199460	0	1	0.104	0.05
A_75_P01154005		4	200517	0	1	0.074	0.03
A_75_P01154074		4	201176	0	1	-0.208	-0.184
A_75_P01154183		4	202269	0	1	-0.374	-0.19
A_75_P01154269		4	203135	0	1	-0.618	-0.27
A_75_P01154373		4	204240	0	1	-0.578	-0.306
A_75_P01154466		4	205183	0	1	-0.518	-0.336
A_75_P01154562		4	206177	0	1	-0.22	-0.128
A_75_P01154579		4	206356	0	1	-0.078	-0.128
A_75_P01154649		4	207106	0	1	0.15	0.006
A_75_P01154742		4	208009	0	1	0.088	0.04
A_75_P01154835		4	208949	0	1	0.114	0.036
A_75_P01154909		4	209696	0	1	0.156	0.05
A_75_P01154991		4	210534	0	1	0.02	0.07
A_75_P01155096		4	211629	0	1	-0.064	-0.068
A_75_P01155170		4	212363	0	1	0.08	-0.06
A_75_P01155256		4	213259	0	1	0.048	-0.006
A_75_P01155339		4	214126	0	1	0.006	-0.03
A_75_P01155438		4	215085	0	1	-0.06	-0.176
A_75_P01155511		4	215788	0	1	0.058	0.012
A_75_P01155582		4	216499	0	1	0.018	0.02
A_75_P01155615		4	216841	0	1	-0.116	-0.06
A_75_P01155655		4	217251	0	1	-0.154	-0.056
A_75_P01155715		4	217854	0	1	0.144	0.186
A_75_P01155837		4	219052	0	1	-0.014	-0.168
A_75_P01155906		4	219740	0	1	-0.038	-0.124
A_75_P01155999		4	220670	0	1	0.15	-0.09
A_75_P01156076		4	221468	0	1	0.152	-0.15
A_75_P01156136		4	222087	0	1	0.102	-0.212
A_75_P01156222		4	222944	0	1	0.296	0.064
A_75_P01156311		4	223819	0	1	0.2	0.006
A_75_P01156371		4	224406	0	1	0.196	-0.074
A_75_P01156447		4	225229	0	1	0.164	0.024
A_75_P01156502		4	225762	0	1	-0.018	0.012
A_75_P01156528		4	226032	0	1	0.012	0.004
A_75_P01156562		4	226366	0	1	0.056	0.082
A_75_P01156639		4	227152	0	1	-0.1	-0.036
A_75_P01156771		4	228460	0	1	-0.084	-0.056
A_75_P01156845		4	229204	0	1	0.082	-0.072
A_75_P01156902		4	229767	0	1	-0.022	-0.11
A_75_P01157004		4	230821	0	1	0.072	-0.12
A_75_P01157068		4	231471	0	1	0.142	0.038
A_75_P01157152		4	232319	0	1	0.094	-0.042
A_75_P01157244		4	233252	0	1	-0.086	-0.046
A_75_P01157325		4	234063	0	1	-0.292	-0.126
A_75_P01157452		4	235371	0	1	-0.506	-0.388
A_75_P01157553		4	236283	0	1	-0.684	-0.47
A_75_P01157589		4	236613	0	1	-0.59	-0.356
A_75_P01157623		4	236945	0	1	-0.4	-0.332
A_75_P01157696		4	237658	0	1	-0.192	-0.204
A_75_P01157770		4	238404	0	1	-0.266	-0.22
A_75_P01157847		4	239167	0	1	-0.316	-0.214
A_75_P01157912		4	239810	0	1	-0.41	-0.356
A_75_P01157981		4	240500	0	1	-0.488	-0.396
A_75_P01158038		4	241126	0	1	-0.606	-0.514
A_75_P01158106		4	241823	0	1	-0.492	-0.462
A_75_P01158190		4	242704	0	1	-0.208	-0.34
A_75_P01158268		4	243498	0	1	-0.106	-0.202
A_75_P01158383		4	244596	0	1	-0.056	-0.142
A_75_P01158465		4	245398	0	1	0.102	0.01
A_75_P01158482		4	245559	0	1	0.216	0.2
A_75_P01158539		4	246133	0	1	0.096	0.056
A_75_P01158631		4	247073	0	1	0.088	0.01
A_75_P01158684		4	247652	0	1	-0.164	-0.01
A_75_P01158768		4	248467	0	1	-0.214	-0.114
A_75_P01158852		4	249311	0	1	-0.138	-0.098
A_75_P01158919		4	250013	0	1	-0.018	-0.022
A_75_P01159042		4	251261	0	1	-0.28	-0.236
A_75_P01159121		4	252024	0	1	-0.208	-0.212
A_75_P01159198		4	252778	0	1	-0.164	-0.208
A_75_P01159324		4	254060	0	1	-0.246	-0.248
A_75_P01159434		4	255114	0	1	-0.38	-0.19
A_75_P01159559		4	256382	0	1	-0.15	-0.052
A_75_P01159584		4	256612	0	1	0.15	-0.044
A_75_P01159630		4	257074	0	1	0.09	0.066
A_75_P01159737		4	258159	0	1	-0.0966667	0.078
A_75_P01159804		4	258834	0	1	0.005	0.068
A_75_P01159885		4	259641	0	1	0.058	0.2
A_75_P01159985		4	260637	0	1	0.15	0.216
A_75_P01160048		4	261256	0	1	-0.006	-0.008
A_75_P01160117		4	261981	0	1	-0.084	-0.134
A_75_P01160194		4	262745	0	1	-0.044	-0.05
A_75_P01160255		4	263410	0	1	0.06	-0.022
A_75_P01160334		4	264164	0	1	-0.018	0.018
A_75_P01160434		4	265149	0	1	0.15	0.184
A_75_P01160525		4	266119	0	1	0.33	0.26
[truncated: 13,167 more rows]

## Sheet: 27547_CLACReport
Sample ID	1a wt #1 vs PSL2	1a wt #2 vs PSL2	8x15k control 1	agilent 8x15 k control 2
Percentage of Miss values	0.0176052	0.00547277	0.00131874	0.00151655
Array SD	0.279806	0.274064
Noise SD	0.226634	0.207776	0.120653	0.112778
Number of Called Genes	556	397
FDR	0.413669	0.579345

## Sheet: 2390
Gene/Clone ID	Gene/Clone Name	ChromosomeNumber	NucleotidePosition	CGH-array	CGH-array	CGH-array			Gene/Clone ID	ChromosomeNumber	NucleotidePosition
Class Label				NN	NN	Disease
Sample Label				8x15k control 1	agilent 8x15 k control 2	1a wt #3 vs PSL2
A_75_P01000003		1	48	0.9	0.72	-0.37			A_75_P01000003	1	48
A_75_P01000148		1	1516	0.57	0.39	0.08			A_75_P01000148	1	1516
A_75_P01000289		1	2997	-0.14	-0.36				A_75_P01000289	1	2997
A_75_P01000360		1	3736	-0.1	-0.03	0.06			A_75_P01000360	1	3736
A_75_P01000410		1	4229	-0.17	-0.08	0.2			A_75_P01000410	1	4229
A_75_P01000473		1	4857	0.06	-0.06	0.24			A_75_P01000473	1	4857
A_75_P01000549		1	5626	-0.2	0.02	-0.01			A_75_P01000549	1	5626
A_75_P01000600		1	6146	-0.03	-0.09	-0.13			A_75_P01000600	1	6146
A_75_P01000684		1	6973	-0.18	-0.17	0.31			A_75_P01000684	1	6973
A_75_P01000762		1	7748	-0.05	-0.13	0.17			A_75_P01000762	1	7748
A_75_P01000835		1	8471	-0.08	-0.03	-0.24			A_75_P01000835	1	8471
A_75_P01000898		1	9065	-0.06	-0.09	-0.21			A_75_P01000898	1	9065
A_75_P01000951		1	9582	-0.33	-0.13	-0.05			A_75_P01000951	1	9582
A_75_P01000967		1	9737	-0.07	0.05				A_75_P01000967	1	9737
A_75_P01001017		1	10241	0.28	0.24	-0.06			A_75_P01001017	1	10241
A_75_P01001106		1	11079	-0.07	0.13	0.06			A_75_P01001106	1	11079
A_75_P01001161		1	11599	-0.16	-0.09	-0.34			A_75_P01001161	1	11599
A_75_P01001343		1	13480	0.31	0.24				A_75_P01001343	1	13480
A_75_P01001457		1	14632	-0.34	-0.24	-0.51			A_75_P01001457	1	14632
A_75_P01001643		1	16454	-0.22	-0.23	-0.82			A_75_P01001643	1	16454
A_75_P01001747		1	17518	0.15	-0.01	-0.61			A_75_P01001747	1	17518
A_75_P01001967		1	19765	0.06	0.06	-0.39			A_75_P01001967	1	19765
A_75_P01002230		1	22516	0.07	-0.04				A_75_P01002230	1	22516
A_75_P01002684		1	27166	0.55	0.43	-0.3			A_75_P01002684	1	27166
A_75_P01002757		1	27935	0.02	0.18	-0.02			A_75_P01002757	1	27935
A_75_P01002834		1	28686	-0.03	-0.18				A_75_P01002834	1	28686
A_75_P01002852		1	28855	0.19	0.2	0.04			A_75_P01002852	1	28855
A_75_P01002903		1	29351	-0.16	-0.01	0.12			A_75_P01002903	1	29351
A_75_P01002980		1	30166	-0.01	0.07	-0.21			A_75_P01002980	1	30166
A_75_P01003050		1	30873	-0.07	-0.06	-0.12			A_75_P01003050	1	30873
A_75_P01003094		1	31327	-0.15	-0.01	-0.29			A_75_P01003094	1	31327
A_75_P01003172		1	32163	-0.01	-0.07	-0.04			A_75_P01003172	1	32163
A_75_P01003241		1	32929	0.21	0.2	0.19			A_75_P01003241	1	32929
A_75_P01003291		1	33457	0.02	0.03	0.4			A_75_P01003291	1	33457
A_75_P01003372		1	34340	-0.15	-0.24	-0.28			A_75_P01003372	1	34340
A_75_P01003435		1	34992	0.22	0.12	1.18			A_75_P01003435	1	34992
A_75_P01003488		1	35595	0.24	0.16	0.01			A_75_P01003488	1	35595
A_75_P01003548		1	36219	0.13	-0.01	-0.26			A_75_P01003548	1	36219
A_75_P01003648		1	37207	-0.28	-0.28	-0.17			A_75_P01003648	1	37207
A_75_P01003669		1	37408	0.12	0.12	-0.1			A_75_P01003669	1	37408
A_75_P01003714		1	37857	-0.06	-0.07	0.03			A_75_P01003714	1	37857
A_75_P01003776		1	38497	0.28	0.22	-0.14			A_75_P01003776	1	38497
A_75_P01003833		1	39096	0	-0.03	0.04			A_75_P01003833	1	39096
A_75_P01003908		1	39844	-0.51	-0.18	0.01			A_75_P01003908	1	39844
A_75_P01003958		1	40358	-0.18	-0.13	0.24			A_75_P01003958	1	40358
A_75_P01004042		1	41229	-0.31	-0.13	0.02			A_75_P01004042	1	41229
A_75_P01004134		1	42180	-0.23	-0.32	0.78			A_75_P01004134	1	42180
A_75_P01004182		1	42678	0.12	0.17	0.1			A_75_P01004182	1	42678
A_75_P01004232		1	43205	0.18	0.12	-0.07			A_75_P01004232	1	43205
A_75_P01004303		1	43934	-0.07	0.03	-0.05			A_75_P01004303	1	43934
A_75_P01004374		1	44697	-0.24	-0.3	-0.12			A_75_P01004374	1	44697
A_75_P01004422		1	45244	-0.24	-0.2	0.02			A_75_P01004422	1	45244
A_75_P01004446		1	45500	0.1	0.12	-0.01			A_75_P01004446	1	45500
A_75_P01004507		1	46151	-0.11	0.02	-0.15			A_75_P01004507	1	46151
A_75_P01004559		1	46773	0.21	0.12	0.13			A_75_P01004559	1	46773
A_75_P01004639		1	47567	0.25	0.3	-0.2			A_75_P01004639	1	47567
A_75_P01004694		1	48146	0.31	0.32	-0.34			A_75_P01004694	1	48146
A_75_P01004751		1	48710	-0.18	0.05	0.18			A_75_P01004751	1	48710
A_75_P01004826		1	49446	0.24	0.33	0.31			A_75_P01004826	1	49446
A_75_P01004925		1	50476	-0.04	-0.04	0.19			A_75_P01004925	1	50476
A_75_P01004994		1	51176	-0.1	-0.21	0.56			A_75_P01004994	1	51176
A_75_P01005043		1	51691	-0.52	-0.34	0			A_75_P01005043	1	51691
A_75_P01005106		1	52376	-0.13	-0.09	-0.01			A_75_P01005106	1	52376
A_75_P01005194		1	53254	0.15	0.27	-0.13			A_75_P01005194	1	53254
A_75_P01005256		1	53873	0.13	0.13	-0.12			A_75_P01005256	1	53873
A_75_P01005273		1	54057	0.33	0.28	0.17			A_75_P01005273	1	54057
A_75_P01005307		1	54427	0.01	0.05	-0.09			A_75_P01005307	1	54427
A_75_P01005387		1	55267	0.16	0.13	0.14			A_75_P01005387	1	55267
A_75_P01005482		1	56231	-0.29	-0.25	4.47			A_75_P01005482	1	56231
A_75_P01005558		1	56986	-0.18	0	-0.07			A_75_P01005558	1	56986
A_75_P01005623		1	57667	-0.13	0.16	-0.1			A_75_P01005623	1	57667
A_75_P01005701		1	58458	0.36	0.28	0.24			A_75_P01005701	1	58458
A_75_P01005779		1	59254	0.37	0.36	0.06			A_75_P01005779	1	59254
A_75_P01005867		1	60185	-0.17	-0.19	0.28			A_75_P01005867	1	60185
A_75_P01005908		1	60674	-0.16	-0.1	-0.07			A_75_P01005908	1	60674
A_75_P01005989		1	61510	0.13	0.12	0.08			A_75_P01005989	1	61510
A_75_P01006058		1	62223	0.3	0.28	-0.1			A_75_P01006058	1	62223
A_75_P01006106		1	62719	0.11	0.03	-0.11			A_75_P01006106	1	62719
A_75_P01006136		1	62995	-0.05	-0.16				A_75_P01006136	1	62995
A_75_P01006194		1	63564	0.24	0.06	-0.02			A_75_P01006194	1	63564
A_75_P01006253		1	64205	-0.19	-0.14	-0.03			A_75_P01006253	1	64205
A_75_P01006312		1	64813	0.25	0.26	-0.22			A_75_P01006312	1	64813
A_75_P01006370		1	65447	0.24	0.16	-0.02			A_75_P01006370	1	65447
A_75_P01006455		1	66305	-0.12	0.02	-0.15			A_75_P01006455	1	66305
A_75_P01006520		1	66901	0.03	-0.02	0.07			A_75_P01006520	1	66901
A_75_P01006590		1	67605	-0.1	-0.04	0.8			A_75_P01006590	1	67605
A_75_P01006657		1	68291	-0.37	0.45	-0.07			A_75_P01006657	1	68291
A_75_P01006713		1	68863	0.43	0.33	-0.25			A_75_P01006713	1	68863
A_75_P01006754		1	69346	0.58	0.55	0.4			A_75_P01006754	1	69346
A_75_P01006814		1	69987	0.24	0.21	-0.33			A_75_P01006814	1	69987
A_75_P01006869		1	70564	-0.22	-0.25	0.34			A_75_P01006869	1	70564
A_75_P01006887		1	70747	0.15	0.06	0.75			A_75_P01006887	1	70747
A_75_P01006941		1	71286	0.23	0.19	-0.12			A_75_P01006941	1	71286
A_75_P01006992		1	71774	-0.24	-0.34	-0.27			A_75_P01006992	1	71774
A_75_P01007061		1	72479	0.05	-0.09				A_75_P01007061	1	72479
A_75_P01007136		1	73253	-0.09	-0.03	0.18			A_75_P01007136	1	73253
A_75_P01007193		1	73812	-0.32	0.03	0.05			A_75_P01007193	1	73812
A_75_P01007246		1	74322	0.16	0.07	-0.02			A_75_P01007246	1	74322
A_75_P01007303		1	74931	-0.44	-0.36	-0.07			A_75_P01007303	1	74931
A_75_P01007380		1	75677	-0.01	-0.06	-0.07			A_75_P01007380	1	75677
A_75_P01007453		1	76420	-0.14	-0.08	-0.19			A_75_P01007453	1	76420
A_75_P01007517		1	77036	-0.37	-0.38	-0.33			A_75_P01007517	1	77036
A_75_P01007598		1	77886	0.11	-0.01	-0.15			A_75_P01007598	1	77886
A_75_P01007681		1	78725	-0.08	-0.14	-0.03			A_75_P01007681	1	78725
A_75_P01007705		1	78983	-0.11	0.08	0.26			A_75_P01007705	1	78983
A_75_P01007739		1	79338	-0.05	-0.02	-0.08			A_75_P01007739	1	79338
A_75_P01007826		1	80173	-0.13	-0.32				A_75_P01007826	1	80173
A_75_P01007896		1	80866	-0.17	-0.26	-0.07			A_75_P01007896	1	80866
A_75_P01007975		1	81714	0.5	0.37	-0.17			A_75_P01007975	1	81714
A_75_P01008053		1	82551	0.15	0.08	0.38			A_75_P01008053	1	82551
A_75_P01008107		1	83113	0.16	0.17				A_75_P01008107	1	83113
A_75_P01008163		1	83738	0.43	0.31	-0.34			A_75_P01008163	1	83738
A_75_P01008264		1	84738	0.38	0.37				A_75_P01008264	1	84738
A_75_P01008324		1	85383	-0.04	0.07	0.27			A_75_P01008324	1	85383
A_75_P01008405		1	86188	0.08	0.1	0.15			A_75_P01008405	1	86188
A_75_P01008487		1	87046	0.14	0.22	0.6			A_75_P01008487	1	87046
A_75_P01008548		1	87671	0.54	0.51	-0.02			A_75_P01008548	1	87671
A_75_P01008580		1	87976	0.13	0.24	-0.24			A_75_P01008580	1	87976
A_75_P01008616		1	88334	-0.06	0.24	0.09			A_75_P01008616	1	88334
A_75_P01008737		1	89566	0.45	0.36	0.16			A_75_P01008737	1	89566
A_75_P01008821		1	90379	0.33	0.41	-0.26			A_75_P01008821	1	90379
A_75_P01008902		1	91203	0.12	0.13	0.23			A_75_P01008902	1	91203
A_75_P01008977		1	91958	0.27	0.39	-0.55			A_75_P01008977	1	91958
A_75_P01009040		1	92630	-0.45	-0.52	0.09			A_75_P01009040	1	92630
A_75_P01009120		1	93423	0	0.11	-0.18			A_75_P01009120	1	93423
A_75_P01009207		1	94357	-0.22	-0.33	-0.1			A_75_P01009207	1	94357
A_75_P01009287		1	95127	0.17	0.03	-0.57			A_75_P01009287	1	95127
A_75_P01009385		1	96055	-0.23	-0.35	-0.36			A_75_P01009385	1	96055
A_75_P01009463		1	96844	0.16	0.11	-0.16			A_75_P01009463	1	96844
A_75_P01009497		1	97199	0.01	0.09	0.11			A_75_P01009497	1	97199
A_75_P01009557		1	97746	0.18	0.27	-0.01			A_75_P01009557	1	97746
A_75_P01009643		1	98627	0.03	0.18	0			A_75_P01009643	1	98627
A_75_P01009709		1	99313	-0.12	-0.25	0.04			A_75_P01009709	1	99313
A_75_P01009766		1	99880	-0.2	0.01	-0.21			A_75_P01009766	1	99880
A_75_P01009850		1	100758	-0.07	-0.17	-0.26			A_75_P01009850	1	100758
A_75_P01009938		1	101656	-0.24	-0.15	-0.49			A_75_P01009938	1	101656
A_75_P01010006		1	102334	0.13	0.21	-0.45			A_75_P01010006	1	102334
A_75_P01010101		1	103308	-0.18	-0.35				A_75_P01010101	1	103308
A_75_P01010184		1	104104	-0.06	-0.04	-0.04			A_75_P01010184	1	104104
A_75_P01010278		1	105018	0.46	0.5	-0.16			A_75_P01010278	1	105018
A_75_P01010336		1	105621	-0.36	-0.09	0.11			A_75_P01010336	1	105621
A_75_P01010404		1	106309	0.15	0.09	0.12			A_75_P01010404	1	106309
A_75_P01010421		1	106502	0.21	0.19	-0.14			A_75_P01010421	1	106502
A_75_P01010487		1	107150	0.07	-0.03	-0.24			A_75_P01010487	1	107150
A_75_P01010528		1	107577	0.14	0.16	-0.27			A_75_P01010528	1	107577
A_75_P01010577		1	108086	-0.14	-0.17	-0.56			A_75_P01010577	1	108086
A_75_P01010628		1	108616	-0.05	-0.16				A_75_P01010628	1	108616
A_75_P01010695		1	109359	-0.07	-0.11	-0.28			A_75_P01010695	1	109359
A_75_P01010777		1	110204	0.15	0.2	0.31			A_75_P01010777	1	110204
A_75_P01010837		1	110836	0.17	0.28	0.45			A_75_P01010837	1	110836
A_75_P01010899		1	111446	0.08	0.02				A_75_P01010899	1	111446
A_75_P01010953		1	112001	-0.56	-0.34	-0.11			A_75_P01010953	1	112001
A_75_P01011016		1	112637	-0.15	-0.09	-0.14			A_75_P01011016	1	112637
A_75_P01011086		1	113326	0.2	0.29	-0.2			A_75_P01011086	1	113326
A_75_P01011144		1	113932	0.36	0.36	-0.02			A_75_P01011144	1	113932
A_75_P01011170		1	114228	0.16	0.11	-0.64			A_75_P01011170	1	114228
A_75_P01011203		1	114597	0.41	0.31	0.36			A_75_P01011203	1	114597
A_75_P01011255		1	115197	0.19	0.32	-0.17			A_75_P01011255	1	115197
A_75_P01011306		1	115733	-0.1	0.27	0.06			A_75_P01011306	1	115733
A_75_P01011384		1	116505	0.47	0.33	-0.83			A_75_P01011384	1	116505
A_75_P01011460		1	117274	-0.23	-0.23	-0.19			A_75_P01011460	1	117274
A_75_P01011539		1	117995	0.42	0.46				A_75_P01011539	1	117995
A_75_P01011595		1	118600	-0.11	-0.18	0.26			A_75_P01011595	1	118600
A_75_P01011666		1	119266	0.09	0.15	-0.04			A_75_P01011666	1	119266
A_75_P01011748		1	120059	0.14	0.19	0.31			A_75_P01011748	1	120059
A_75_P01011809		1	120671	-0.19	-0.33				A_75_P01011809	1	120671
A_75_P01011863		1	121242	-0.23	-0.26	-0.3			A_75_P01011863	1	121242
A_75_P01011938		1	121957	-0.12	-0.12	-0.53			A_75_P01011938	1	121957
A_75_P01011965		1	122237	0.32	0.15	1.04			A_75_P01011965	1	122237
A_75_P01011999		1	122586	-0.32	-0.15	-0.13			A_75_P01011999	1	122586
A_75_P01012099		1	123537	-0.04	-0.05	-0.17			A_75_P01012099	1	123537
A_75_P01012160		1	124182	0.16	0.22	-0.01			A_75_P01012160	1	124182
A_75_P01012229		1	124839	-0.04	-0.08	-0.1			A_75_P01012229	1	124839
A_75_P01012314		1	125694	0.11	0.06	0.13			A_75_P01012314	1	125694
A_75_P01012393		1	126524	-0.11	0.1	0.1			A_75_P01012393	1	126524
A_75_P01012490		1	127508	-0.01	-0.19	0.03			A_75_P01012490	1	127508
A_75_P01012556		1	128196	-0.2	-0.16	0.29			A_75_P01012556	1	128196
A_75_P01012606		1	128709	0.12	0.18	-0.1			A_75_P01012606	1	128709
A_75_P01012681		1	129523	-0.01	-0.04	-0.37			A_75_P01012681	1	129523
A_75_P01012739		1	130157	0.12	0.36	-0.04			A_75_P01012739	1	130157
A_75_P01012796		1	130727	0.2	0.09	-0.29			A_75_P01012796	1	130727
A_75_P01012813		1	130910	0.01	-0.24	-0.13			A_75_P01012813	1	130910
A_75_P01012852		1	131344	0.08	0.12	-0.1			A_75_P01012852	1	131344
A_75_P01012926		1	132118	-0.08	-0.02	0.08			A_75_P01012926	1	132118
A_75_P01013008		1	132979	0.3	0.32	-0.25			A_75_P01013008	1	132979
A_75_P01013066		1	133565	0.24	0.19	0.14			A_75_P01013066	1	133565
A_75_P01013159		1	134556	0.06	0.13	-0.31			A_75_P01013159	1	134556
A_75_P01013246		1	135426	0.32	0.16				A_75_P01013246	1	135426
A_75_P01013311		1	136112	0.01	-0.01	0.5			A_75_P01013311	1	136112
A_75_P01013363		1	136645	-0.26	-0.14	-0.42			A_75_P01013363	1	136645
A_75_P01013415		1	137199	0.44	0.42	-0.37			A_75_P01013415	1	137199
A_75_P01013483		1	137857	0.32	0.29	0.1			A_75_P01013483	1	137857
A_75_P01013565		1	138668	-0.06	-0.08	-0.05			A_75_P01013565	1	138668
A_75_P01013621		1	139288	-0.07	-0.05	-0.77			A_75_P01013621	1	139288
A_75_P01013634		1	139438	0.08	0.09	0.15			A_75_P01013634	1	139438
A_75_P01013705		1	140134	-0.14	-0.16	-0.3			A_75_P01013705	1	140134
A_75_P01013842		1	141556	0.1	0.16	-0.35			A_75_P01013842	1	141556
A_75_P01013926		1	142436	0.21	0.2	-0.03			A_75_P01013926	1	142436
A_75_P01014006		1	143256	-0.08	-0.07	0.12			A_75_P01014006	1	143256
A_75_P01014070		1	143904	0	0.08	0.05			A_75_P01014070	1	143904
A_75_P01014137		1	144582	-0.12	-0.23	0.05			A_75_P01014137	1	144582
A_75_P01014209		1	145221	-0.53	-0.23	-0.13			A_75_P01014209	1	145221
A_75_P01014290		1	145992	-0.12	-0.08	-0.48			A_75_P01014290	1	145992
A_75_P01014379		1	146912	-0.04	0	0.17			A_75_P01014379	1	146912
A_75_P01014459		1	147714	0.04	-0.07	-0.35			A_75_P01014459	1	147714
A_75_P01014512		1	148227	0.43	0.36	0.14			A_75_P01014512	1	148227
A_75_P01014602		1	149140	0.31	0.36				A_75_P01014602	1	149140
A_75_P01014623		1	149317	0.02	0.03	-0.26			A_75_P01014623	1	149317
A_75_P01014660		1	149713	-0.24	0.15	0.41			A_75_P01014660	1	149713
A_75_P01014722		1	150340	0.21	0.16				A_75_P01014722	1	150340
A_75_P01014782		1	150964	0.04	-0.03				A_75_P01014782	1	150964
A_75_P01014837		1	151546	0.24	0.16	0.02			A_75_P01014837	1	151546
A_75_P01014916		1	152366	-0.16	-0.21				A_75_P01014916	1	152366
A_75_P01015021		1	153409	-0.2	-0.24				A_75_P01015021	1	153409
A_75_P01015100		1	154240	-0.16	0.13	0.53			A_75_P01015100	1	154240
A_75_P01015170		1	154956	0.24	0.23	0.17			A_75_P01015170	1	154956
A_75_P01015222		1	155481	0.01	-0.11	0.02			A_75_P01015222	1	155481
A_75_P01015299		1	156232	0.1	0.05	-0.16			A_75_P01015299	1	156232
A_75_P01015375		1	156971	-0.13	0.17	-0.1			A_75_P01015375	1	156971
A_75_P01015460		1	157766	-0.05	-0.22	0.27			A_75_P01015460	1	157766
A_75_P01015478		1	157944	0.37	0.41				A_75_P01015478	1	157944
A_75_P01015514		1	158325	0	0.1	0.02			A_75_P01015514	1	158325
A_75_P01015598		1	159128	-0.19	-0.29	-0.32			A_75_P01015598	1	159128
A_75_P01015685		1	160004	-0.22	-0.37	0.38			A_75_P01015685	1	160004
A_75_P01016350		1	166406	0.07	0.21	-0.27			A_75_P01016350	1	166406
A_75_P01016402		1	166934	0.28	0.28	-0.14			A_75_P01016402	1	166934
A_75_P01016479		1	167710	-0.04	-0.05	-0.31			A_75_P01016479	1	167710
A_75_P01016543		1	168332	0.16	0.2	0.14			A_75_P01016543	1	168332
A_75_P01016637		1	169276	0.01	-0.09	-0.01			A_75_P01016637	1	169276
A_75_P01016722		1	170117	0.07	0.09	-0.19			A_75_P01016722	1	170117
A_75_P01016782		1	170716	0.04	-0.02	-0.18			A_75_P01016782	1	170716
A_75_P01016858		1	171474	0.29	0.21				A_75_P01016858	1	171474
A_75_P01016917		1	172079	-0.37	-0.42				A_75_P01016917	1	172079
A_75_P01016945		1	172342	-0.15	-0.1	-0.14			A_75_P01016945	1	172342
A_75_P01017006		1	172912	0.02	0.07	0.22			A_75_P01017006	1	172912
A_75_P01017077		1	173619	0.18	0.11	0.37			A_75_P01017077	1	173619
A_75_P01017149		1	174351	-0.1	-0.03				A_75_P01017149	1	174351
A_75_P01017220		1	175099	0.17	0.21	0.46			A_75_P01017220	1	175099
A_75_P01017426		1	177113	0.27	0.16				A_75_P01017426	1	177113
A_75_P01017491		1	177719	0.2	0.2	0.02			A_75_P01017491	1	177719
A_75_P01017567		1	178467	-0.03	0.02	0.66			A_75_P01017567	1	178467
A_75_P01017638		1	179160	0.3	0.19	0.07			A_75_P01017638	1	179160
A_75_P01017697		1	179758	-0.25	-0.29	0.62			A_75_P01017697	1	179758
A_75_P01017778		1	180536	-0.18	0	-0.01			A_75_P01017778	1	180536
A_75_P01017829		1	181067	-0.16	-0.1	-0.34			A_75_P01017829	1	181067
A_75_P01017854		1	181321	-0.08	-0.05	-0.2			A_75_P01017854	1	181321
A_75_P01017893		1	181679	0.1	0.12	-0.02			A_75_P01017893	1	181679
A_75_P01017968		1	182441	-0.21	-0.06	0.07			A_75_P01017968	1	182441
A_75_P01018077		1	183527	0.25	0.33	-1.17			A_75_P01018077	1	183527
A_75_P01018147		1	184210	-0.28	-0.14	-0.3			A_75_P01018147	1	184210
A_75_P01018250		1	185284	0.13	0.17	-0.47			A_75_P01018250	1	185284
A_75_P01018311		1	185903	0.04	0.11	-0.19			A_75_P01018311	1	185903
A_75_P01018388		1	186672	0.04	-0.02	-0.23			A_75_P01018388	1	186672
A_75_P01018460		1	187397	0.27	0.15	-2.31			A_75_P01018460	1	187397
A_75_P01018544		1	188329	0.18	0.06	-0.68			A_75_P01018544	1	188329
A_75_P01018714		1	190077	0.28	0.26				A_75_P01018714	1	190077
A_75_P01018781		1	190830	0.25	0.18	-0.1			A_75_P01018781	1	190830
A_75_P01018848		1	191693	0.38	0.43	-0.35			A_75_P01018848	1	191693
A_75_P01018861		1	191840	0.1	-0.01	-0.29			A_75_P01018861	1	191840
A_75_P01018894		1	192237	0.45	0.47	0.8			A_75_P01018894	1	192237
A_75_P01018950		1	192821	0.16	0.07	-0.11			A_75_P01018950	1	192821
A_75_P01019042		1	193813	-0.3	-0.03	1.47			A_75_P01019042	1	193813
A_75_P01019112		1	194508	-0.13	-0.02	0.07			A_75_P01019112	1	194508
A_75_P01019175		1	195154	-0.22	0.21	-0.23			A_75_P01019175	1	195154
A_75_P01019260		1	196008	-0.27	-0.21	-0.13			A_75_P01019260	1	196008
A_75_P01019331		1	196754	-0.26	-0.21	1.08			A_75_P01019331	1	196754
A_75_P01019383		1	197254	-0.16	-0.25	0.18			A_75_P01019383	1	197254
A_75_P01019459		1	198003	-0.24	-0.39	0.23			A_75_P01019459	1	198003
A_75_P01019538		1	198759	-0.13	0.07	-0.13			A_75_P01019538	1	198759
A_75_P01019594		1	199310	-0.02	-0.03	-0.66			A_75_P01019594	1	199310
A_75_P01019669		1	200086			-0.65			A_75_P01019669	1	200086
A_75_P01019693		1	200353						A_75_P01019693	1	200353
A_75_P01019791		1	201375						A_75_P01019747	1	200883
A_75_P01019855		1	202009						A_75_P01019791	1	201375
A_75_P01019931		1	202726	-0.16	-0.12	0.76			A_75_P01019855	1	202009
A_75_P01020000		1	203405	0.01	0.16	0.04			A_75_P01019931	1	202726
A_75_P01020270		1	206273	0.22	0.3	-2.34			A_75_P01020000	1	203405
A_75_P01020408		1	207629	0	-0.03	-1.1			A_75_P01020270	1	206273
A_75_P01022284		1	226845	-0.34	-0.5	-0.46			A_75_P01020408	1	207629
A_75_P01022345		1	227433			-1.16			A_75_P01022284	1	226845
A_75_P01022508		1	229146	0.25	0.28	0.05			A_75_P01022345	1	227433
A_75_P01023234		2	6566	0.21	0.12	0.36			A_75_P01022508	1	229146
A_75_P01023395		2	8282	0.07	-0.07	0.39			A_75_P01022572	1	229802
A_75_P01023448		2	8802	0.3	0.29	0.52			A_75_P01023234	2	6566
A_75_P01023549		2	9790	-0.11	-0.24	-0.09			A_75_P01023395	2	8282
A_75_P01023608		2	10392	-0.13	-0.09	0.01			A_75_P01023448	2	8802
A_75_P01023730		2	11589	-0.01	0.06	0			A_75_P01023549	2	9790
A_75_P01023785		2	12113	0.02	0.07	-0.02			A_75_P01023608	2	10392
A_75_P01023877		2	13062	-0.13	-0.06	-0.03			A_75_P01023730	2	11589
A_75_P01023953		2	13820	-0.45	-0.38	-0.17			A_75_P01023785	2	12113
A_75_P01024026		2	14550	0.13	0.13	0.2			A_75_P01023877	2	13062
A_75_P01024089		2	15211	-0.09	-0.03	0.81			A_75_P01023953	2	13820
A_75_P01024155		2	15814	-0.05	-0.13	-0.01			A_75_P01024026	2	14550
A_75_P01024232		2	16596	0.26	0.38	1.24			A_75_P01024089	2	15211
A_75_P01024322		2	17503	-0.01	0.02				A_75_P01024155	2	15814
A_75_P01024341		2	17687	0.33	0.34	0.01			A_75_P01024232	2	16596
A_75_P01024385		2	18141	0.34	0.21	0.05			A_75_P01024322	2	17503
A_75_P01024492		2	19208	0.09	0.06				A_75_P01024341	2	17687
A_75_P01024576		2	20086	0.02	0.12	0.1			A_75_P01024385	2	18141
A_75_P01024632		2	20628	0.03	0.02	-0.11			A_75_P01024492	2	19208
A_75_P01024701		2	21262	0.08	-0.04	0.57			A_75_P01024576	2	20086
A_75_P01024781		2	22018	-0.31	0.02	0.34			A_75_P01024632	2	20628
A_75_P01024874		2	22961	0.15	0.08	-0.09			A_75_P01024701	2	21262
A_75_P01024949		2	23774	0.18	0.13	-0.04			A_75_P01024781	2	22018
A_75_P01025033		2	24599	0.36	0.32	-0.11			A_75_P01024874	2	22961
A_75_P01025119		2	25416	-0.2	-0.14	-0.39			A_75_P01024949	2	23774
A_75_P01025190		2	26191	0.31	0.23	0.07			A_75_P01025033	2	24599
A_75_P01025291		2	27223	-0.2	-0.08	-0.1			A_75_P01025119	2	25416
A_75_P01025331		2	27615	0.11	0.09	0.44			A_75_P01025190	2	26191
A_75_P01025382		2	28099	-0.15	-0.12	-0.05			A_75_P01025291	2	27223
A_75_P01025443		2	28709	0.07	0.08	0.24			A_75_P01025331	2	27615
A_75_P01026103		2	35567	0.34	0.28	0.09			A_75_P01025382	2	28099
A_75_P01026196		2	36473	0.39	0.23	0.15			A_75_P01025443	2	28709
A_75_P01026261		2	37164	-0.33	-0.33	-0.37			A_75_P01026103	2	35567
A_75_P01026335		2	37919	-0.26	-0.07	0.04			A_75_P01026196	2	36473
A_75_P01026419		2	38763	-0.22	-0.45	-0.02			A_75_P01026261	2	37164
A_75_P01026500		2	39564	-0.25	-0.3				A_75_P01026335	2	37919
A_75_P01026586		2	40420	-0.12	0.15	0.13			A_75_P01026419	2	38763
A_75_P01026672		2	41293	-0.25	-0.15	-0.23			A_75_P01026500	2	39564
A_75_P01026737		2	41984	-0.29	-0.36	-0.24			A_75_P01026586	2	40420
A_75_P01026803		2	42676	0.04	0.33	-0.01			A_75_P01026672	2	41293
A_75_P01026821		2	42860	-0.25	0.14				A_75_P01026737	2	41984
A_75_P01026898		2	43659	-0.01	-0.13				A_75_P01026803	2	42676
A_75_P01026965		2	44309	0.36	0.18	-0.06			A_75_P01026821	2	42860
A_75_P01027037		2	45013	0.09	0.09				A_75_P01026898	2	43659
A_75_P01027104		2	45655	0.02	0.08	0.12			A_75_P01026965	2	44309
A_75_P01027162		2	46255	-0.21	-0.11	0.12			A_75_P01027037	2	45013
A_75_P01027231		2	46973	0.02	0.29	-0.07			A_75_P01027104	2	45655
A_75_P01027330		2	47964	-0.07	-0.06	0.9			A_75_P01027162	2	46255
A_75_P01027404		2	48779	0.01	-0.16				A_75_P01027231	2	46973
A_75_P01027532		2	50097	0.24	0.07	-0.02			A_75_P01027330	2	47964
A_75_P01027634		2	51080	0.16	0.27	-0.02			A_75_P01027404	2	48779
A_75_P01027718		2	51934	0.08	0.08	-0.12			A_75_P01027532	2	50097
A_75_P01027782		2	52585	0.22	0.08				A_75_P01027634	2	51080
A_75_P01027810		2	52872	0.27	0.35	0.84			A_75_P01027718	2	51934
A_75_P01027845		2	53255	0.26	0.16	0.11			A_75_P01027782	2	52585
A_75_P01027916		2	53970	-0.33	-0.45	0.05			A_75_P01027810	2	52872
A_75_P01028006		2	54946	-0.22	-0.25	0.07			A_75_P01027845	2	53255
A_75_P01028081		2	55694	-0.37	-0.23	-0.21			A_75_P01027916	2	53970
A_75_P01028146		2	56357	0.05	0.01	-0.23			A_75_P01028006	2	54946
A_75_P01028222		2	57104	-0.32	-0.21	-0.05			A_75_P01028081	2	55694
A_75_P01028291		2	57794	-0.18	-0.19	1.05			A_75_P01028146	2	56357
A_75_P01028381		2	58739	0.06	0.04	0.06			A_75_P01028222	2	57104
A_75_P01028443		2	59341	0.27	0.2	0.96			A_75_P01028291	2	57794
A_75_P01028561		2	60534	0.15	0.2	0.03			A_75_P01028381	2	58739
A_75_P01028662		2	61515	0	0.1	-0.05			A_75_P01028443	2	59341
A_75_P01028760		2	62519	0.24	0.36	0.1			A_75_P01028561	2	60534
A_75_P01028795		2	62860	0.14	0.07	-0.1			A_75_P01028662	2	61515
A_75_P01028843		2	63365	-0.18	-0.21	-0.02			A_75_P01028760	2	62519
A_75_P01028926		2	64213	-0.09	-0.11	-0.25			A_75_P01028795	2	62860
A_75_P01029029		2	65268	-0.01	-0.19				A_75_P01028843	2	63365
A_75_P01029115		2	66116	-0.11	-0.12	-0.24			A_75_P01028926	2	64213
A_75_P01029200		2	66916	-0.09	-0.28	-0.01			A_75_P01029029	2	65268
A_75_P01029291		2	67871	-0.42	-0.33	0.12			A_75_P01029115	2	66116
A_75_P01029360		2	68620	0.35	0.36	-0.16			A_75_P01029200	2	66916
A_75_P01029524		2	70229	0.27	0.11	0.45			A_75_P01029291	2	67871
A_75_P01029605		2	71135	0.31	0.4	-0.05			A_75_P01029360	2	68620
A_75_P01029690		2	72007	0.25	0.16	-0.31			A_75_P01029524	2	70229
A_75_P01029753		2	72654	0.34	0.27	-0.02			A_75_P01029605	2	71135
A_75_P01029772		2	72840	0.24	0.14	1.14			A_75_P01029690	2	72007
A_75_P01029819		2	73336	-0.44	-0.23	1.03			A_75_P01029753	2	72654
A_75_P01029889		2	74085	-0.1	-0.07	-0.05			A_75_P01029772	2	72840
A_75_P01029977		2	74931	-0.09	0.1	0.1			A_75_P01029819	2	73336
A_75_P01030072		2	75843	0.08	0.1	-0.14			A_75_P01029889	2	74085
A_75_P01030122		2	76363	-0.35	-0.2	-0.03			A_75_P01029977	2	74931
A_75_P01030206		2	77203	0.21	0.2	1.51			A_75_P01030072	2	75843
A_75_P01030268		2	77819	-0.22	-0.34				A_75_P01030122	2	76363
A_75_P01030367		2	78816	0.14	0.07				A_75_P01030206	2	77203
A_75_P01030466		2	79821	-0.41	-0.51	-0.1			A_75_P01030268	2	77819
A_75_P01030541		2	80586	0.21	0.27	1.35			A_75_P01030367	2	78816
A_75_P01030637		2	81507	0.17	0.18	0.05			A_75_P01030466	2	79821
A_75_P01030750		2	82650	-0.13	-0.08	-0.17			A_75_P01030541	2	80586
A_75_P01030778		2	82955	0.12	0.01	2.01			A_75_P01030637	2	81507
A_75_P01030841		2	83518	-0.29	-0.51	-0.1			A_75_P01030750	2	82650
A_75_P01030927		2	84394	0.06	0.23	0.24			A_75_P01030778	2	82955
A_75_P01031016		2	85366	-0.19	-0.26	-0.05			A_75_P01030841	2	83518
A_75_P01031099		2	86197	-0.14	-0.07	-0.12			A_75_P01030927	2	84394
A_75_P01031196		2	87154	-0.18	-0.21	-0.07			A_75_P01031016	2	85366
A_75_P01031252		2	87727	0.04	0.2	-0.3			A_75_P01031099	2	86197
A_75_P01031374		2	88963	0.24	0.21	-0.07			A_75_P01031196	2	87154
A_75_P01031471		2	89889	-0.2	-0.4	0.11			A_75_P01031252	2	87727
A_75_P01031550		2	90724	-0.05	-0.15	-0.06			A_75_P01031374	2	88963
A_75_P01031618		2	91389	-0.57	-0.42	0.06			A_75_P01031471	2	89889
A_75_P01031679		2	91985	-0.23	-0.37	0.15			A_75_P01031550	2	90724
A_75_P01031767		2	92891	-0.11	-0.14	-0.12			A_75_P01031618	2	91389
A_75_P01031790		2	93134	0.09	0.11	0.38			A_75_P01031679	2	91985
A_75_P01031848		2	93746	0.28	0.21	0.07			A_75_P01031767	2	92891
A_75_P01031943		2	94636	-0.4	-0.32	-0.25			A_75_P01031790	2	93134
A_75_P01032044		2	95681	-0.24	-0.33				A_75_P01031848	2	93746
A_75_P01032108		2	96289	0.11	-0.02	-0.21			A_75_P01031943	2	94636
A_75_P01032173		2	96927	-0.61	-0.32	-0.34			A_75_P01032044	2	95681
A_75_P01032242		2	97635	-0.11	-0.01	-0.04			A_75_P01032108	2	96289
A_75_P01032331		2	98465	0.27	0.26	-0.05			A_75_P01032173	2	96927
A_75_P01032416		2	99276	-0.18	-0.17	-0.1			A_75_P01032242	2	97635
A_75_P01032490		2	100021	0.16	0.08	0.01			A_75_P01032331	2	98465
A_75_P01032576		2	100910	0.24	0.25	0.96			A_75_P01032416	2	99276
A_75_P01032664		2	101810	0.15	0.15	-0.18			A_75_P01032490	2	100021
A_75_P01032737		2	102522	-0.01	-0.09	0.17			A_75_P01032576	2	100910
A_75_P01032755		2	102691	-0.21	-0.31	-0.05			A_75_P01032664	2	101810
A_75_P01032807		2	103259	-0.27	-0.27	-0.29			A_75_P01032737	2	102522
A_75_P01032882		2	104003	0.09	-0.02	-0.09			A_75_P01032755	2	102691
A_75_P01032951		2	104701	-0.17	-0.25	-0.25			A_75_P01032807	2	103259
A_75_P01033018		2	105374	0.28	0.16	0.69			A_75_P01032882	2	104003
A_75_P01033092		2	106133	0.16	0.04	-0.14			A_75_P01032951	2	104701
A_75_P01033168		2	106844	-0.17	-0.23	0.18			A_75_P01033018	2	105374
A_75_P01033232		2	107452	-0.08	-0.01	-0.07			A_75_P01033092	2	106133
A_75_P01033310		2	108262	0.09	0.01	0.04			A_75_P01033168	2	106844
A_75_P01033391		2	109092	-0.1	-0.08	0.02			A_75_P01033232	2	107452
A_75_P01033493		2	110075	0.32	0.38	0.03			A_75_P01033310	2	108262
A_75_P01033576		2	110856	0.05	-0.06	-0.21			A_75_P01033391	2	109092
A_75_P01033660		2	111759	0.12	0.16	0.01			A_75_P01033493	2	110075
A_75_P01033692		2	112062	0.03	-0.12	-0.35			A_75_P01033576	2	110856
A_75_P01033754		2	112753	0.11	0.06	1.55			A_75_P01033660	2	111759
A_75_P01033830		2	113532	-0.26	-0.2	-0.02			A_75_P01033692	2	112062
A_75_P01033893		2	114196	0.06	0.05	0.36			A_75_P01033754	2	112753
A_75_P01033969		2	114957	0.18	0.49	0.1			A_75_P01033830	2	113532
A_75_P01034062		2	115886	0.03	-0.01	0.03			A_75_P01033893	2	114196
A_75_P01034147		2	116755	0.11	0.06	1.91			A_75_P01033969	2	114957
A_75_P01034233		2	117605	0.19	0.15	0.7			A_75_P01034062	2	115886
A_75_P01034317		2	118407	-0.2	-0.24	-0.39			A_75_P01034147	2	116755
A_75_P01034418		2	119372	0.26	0.24	1.92			A_75_P01034233	2	117605
A_75_P01034493		2	120115	0.12	0.01	0.17			A_75_P01034317	2	118407
A_75_P01034589		2	121029	0.12	0.15	-0.2			A_75_P01034418	2	119372
A_75_P01034649		2	121703	0.06	0.04	0.15			A_75_P01034493	2	120115
A_75_P01034678		2	121976	-0.02	0.19	-0.21			A_75_P01034589	2	121029
A_75_P01034722		2	122395	-0.06	0.03	0.12			A_75_P01034649	2	121703
A_75_P01034805		2	123280	0.03	0.12	0.46			A_75_P01034678	2	121976
A_75_P01034885		2	124056	0.4	0.21	1.03			A_75_P01034722	2	122395
A_75_P01034955		2	124769	-0.12	-0.01	-0.06			A_75_P01034805	2	123280
A_75_P01035047		2	125689	0.05	0.05	-0.09			A_75_P01034885	2	124056
A_75_P01035102		2	126203	0.08	-0.02	-0.28			A_75_P01034955	2	124769
A_75_P01035196		2	127195	0.42	0.13	0.49			A_75_P01035047	2	125689
A_75_P01035275		2	128004	0.11	0.06	0.23			A_75_P01035102	2	126203
A_75_P01035376		2	129021	0.17	0.33	-0.07			A_75_P01035196	2	127195
A_75_P01035447		2	129739	0.17	0.19				A_75_P01035275	2	128004
A_75_P01035520		2	130461	0.2	0.15				A_75_P01035376	2	129021
A_75_P01035592		2	131178	-0.35	-0.25	0.34			A_75_P01035447	2	129739
A_75_P01035615		2	131397	-0.29	-0.02	-0.11			A_75_P01035520	2	130461
A_75_P01035677		2	132041	-0.06	0.05	0.19			A_75_P01035592	2	131178
A_75_P01035781		2	133103	-0.42	-0.44	-0.19			A_75_P01035615	2	131397
A_75_P01035885		2	134102	-0.05	0.07				A_75_P01035677	2	132041
A_75_P01035954		2	134780	-0.48	-0.46	-0.21			A_75_P01035781	2	133103
A_75_P01036030		2	135522	-0.32	0.3	0.03			A_75_P01035885	2	134102
A_75_P01036127		2	136448	-0.23	-0.2	0.32			A_75_P01035954	2	134780
A_75_P01036195		2	137118	0.05	0.04				A_75_P01036030	2	135522
A_75_P01036247		2	137673	-0.18	0.08	0			A_75_P01036127	2	136448
A_75_P01036328		2	138476	-0.07	-0.06	-0.06			A_75_P01036195	2	137118
A_75_P01036433		2	139522	0.03	0.04	0.06			A_75_P01036247	2	137673
A_75_P01036512		2	140362	-0.17	-0.27	-0.15			A_75_P01036328	2	138476
A_75_P01036591		2	141128	0.14	0.04	0.57			A_75_P01036433	2	139522
A_75_P01036609		2	141334	0.23	0.27	-0.35			A_75_P01036512	2	140362
A_75_P01036648		2	141734	-0.14	-0.24	0.09			A_75_P01036591	2	141128
A_75_P01036728		2	142562	-0.16	-0.2	-0.23			A_75_P01036609	2	141334
A_75_P01036792		2	143179	0.3	0.27	-0.18			A_75_P01036648	2	141734
A_75_P01036844		2	143721	-0.34	-0.24	-0.01			A_75_P01036728	2	142562
A_75_P01036942		2	144651	0.14	0.12	0.22			A_75_P01036792	2	143179
A_75_P01037002		2	145251	-0.12	-0.21	0.33			A_75_P01036844	2	143721
A_75_P01037067		2	145926	-0.26	-0.26				A_75_P01036942	2	144651
A_75_P01037150		2	146725	-0.09	-0.17	0.88			A_75_P01037002	2	145251
A_75_P01037247		2	147725	-0.11	-0.08				A_75_P01037067	2	145926
A_75_P01037314		2	148413	-0.01	0.04	-0.02			A_75_P01037150	2	146725
A_75_P01037411		2	149372	0.01	0.04	0.04			A_75_P01037247	2	147725
A_75_P01037515		2	150388	0.08	-0.25	-0.05			A_75_P01037314	2	148413
A_75_P01037550		2	150754	-0.03	0.01	-0.04			A_75_P01037411	2	149372
A_75_P01037631		2	151586	-0.08	-0.23	0.55			A_75_P01037515	2	150388
A_75_P01037721		2	152465	0.2	0.27	-0.32			A_75_P01037550	2	150754
A_75_P01037794		2	153203	-0.14	-0.15				A_75_P01037631	2	151586
A_75_P01037865		2	153948	0.07	0.08	-0.24			A_75_P01037721	2	152465
A_75_P01037954		2	154852	0.1	-0.11				A_75_P01037794	2	153203
A_75_P01038069		2	155982	-0.4	-0.35	-0.07			A_75_P01037865	2	153948
A_75_P01038144		2	156755	0.07	0.01				A_75_P01037954	2	154852
A_75_P01038223		2	157530	0.07	0.25	0.16			A_75_P01038069	2	155982
A_75_P01038303		2	158360	-0.12	-0.27				A_75_P01038144	2	156755
A_75_P01038385		2	159276	0.34	0.3	-0.21			A_75_P01038223	2	157530
A_75_P01038562		2	161103	-0.14	-0.14	0.08			A_75_P01038303	2	158360
A_75_P01038601		2	161475	-0.08	-0.11	0.11			A_75_P01038385	2	159276
A_75_P01038649		2	161971	0.04	0.17	-0.23			A_75_P01038562	2	161103
A_75_P01038732		2	162803	-0.3	-0.33	-0.08			A_75_P01038601	2	161475
A_75_P01038790		2	163374	0.22	0.16	-0.14			A_75_P01038649	2	161971
A_75_P01038878		2	164306	-0.19	-0.14	0.12			A_75_P01038732	2	162803
A_75_P01038944		2	165018	-0.23	-0.01	0			A_75_P01038790	2	163374
A_75_P01039010		2	165711	0.2	0.12	-0.33			A_75_P01038878	2	164306
A_75_P01039107		2	166634	0.25	0.38				A_75_P01038944	2	165018
A_75_P01039211		2	167737	0.13	0.23	0.11			A_75_P01039010	2	165711
A_75_P01039289		2	168516	-0.16	-0.08	-0.04			A_75_P01039107	2	166634
A_75_P01039386		2	169508	-0.02	-0.03	0.59			A_75_P01039211	2	167737
A_75_P01039503		2	170713	-0.13	0.09	0.16			A_75_P01039289	2	168516
A_75_P01039602		2	171730	-0.16	-0.43	-0.2			A_75_P01039386	2	169508
A_75_P01039623		2	171931	0.01	0.03	0.25			A_75_P01039503	2	170713
A_75_P01039692		2	172661	0.13	-0.06	-0.02			A_75_P01039602	2	171730
A_75_P01039776		2	173470	0.34	0.32	-0.03			A_75_P01039623	2	171931
A_75_P01039846		2	174193	-0.1	-0.04	0.24			A_75_P01039692	2	172661
A_75_P01039935		2	175080	-0.21	-0.02	-0.15			A_75_P01039776	2	173470
A_75_P01039989		2	175595	0.2	0.12	0.4			A_75_P01039846	2	174193
A_75_P01040065		2	176336	0.06	0	0.67			A_75_P01039935	2	175080
A_75_P01040131		2	176967	0.25	0.23	-0.23			A_75_P01039989	2	175595
A_75_P01040220		2	177831	0.2	-0.08	0.04			A_75_P01040065	2	176336
A_75_P01040332		2	178901	0.14	0.01	-0.07			A_75_P01040131	2	176967
A_75_P01040450		2	180045	0.17	0.01	0.13			A_75_P01040220	2	177831
A_75_P01040547		2	181046	0.14	0.12	-0.39			A_75_P01040332	2	178901
A_75_P01040627		2	181856	0.29	0.3	-0.11			A_75_P01040450	2	180045
A_75_P01040647		2	182066	0.06	0.07	0.17			A_75_P01040547	2	181046
A_75_P01040717		2	182764	0.27	0.16				A_75_P01040627	2	181856
A_75_P01040808		2	183716	-0.09	-0.31				A_75_P01040647	2	182066
A_75_P01040862		2	184248	-0.03	-0.01	-0.19			A_75_P01040717	2	182764
A_75_P01040938		2	184992	0.05	0.07				A_75_P01040808	2	183716
A_75_P01041027		2	185846	0.08	0.09	0.28			A_75_P01040862	2	184248
A_75_P01041133		2	186893	0.17	0.13				A_75_P01040938	2	184992
A_75_P01041223		2	187759	0.19	0.05	-0.12			A_75_P01041027	2	185846
A_75_P01041358		2	189103	-0.41	-0.27	1.03			A_75_P01041133	2	186893
A_75_P01041437		2	189879	0.17	0.16	-0.12			A_75_P01041223	2	187759
A_75_P01041526		2	190790	-0.34	-0.36	-0.04			A_75_P01041358	2	189103
A_75_P01041612		2	191655	-0.03	-0.11	-0.13			A_75_P01041437	2	189879
A_75_P01041676		2	192272	0.09	0.07	0.19			A_75_P01041526	2	190790
A_75_P01041715		2	192671	0.21	0.2	-0.15			A_75_P01041612	2	191655
A_75_P01041786		2	193426	0.12	0.18	0.14			A_75_P01041676	2	192272
A_75_P01041856		2	194137	-0.37	-0.31	0.04			A_75_P01041715	2	192671
A_75_P01041919		2	194838	-0.32	-0.32	-0.19			A_75_P01041786	2	193426
A_75_P01041987		2	195581	-0.26	-0.01	0.1			A_75_P01041856	2	194137
A_75_P01042049		2	196189	0	0.02	0.05			A_75_P01041919	2	194838
A_75_P01042148		2	197205	-0.06	-0.07	0.07			A_75_P01041987	2	195581
A_75_P01042269		2	198438	-0.08	-0.09	-0.14			A_75_P01042049	2	196189
A_75_P01042370		2	199452	-0.14	0.03	0.16			A_75_P01042148	2	197205
A_75_P01042454		2	200322	0.38	0.38	-0.11			A_75_P01042269	2	198438
A_75_P01042531		2	201031	0.21	0.16	-0.1			A_75_P01042370	2	199452
A_75_P01042611		2	201863	-0.39	-0.41	-0.11			A_75_P01042454	2	200322
A_75_P01042686		2	202640	0.34	0.27	0.07			A_75_P01042531	2	201031
A_75_P01042720		2	202986	-0.01	-0.07	-0.13			A_75_P01042611	2	201863
A_75_P01042758		2	203385	0.35	0.31	-0.02			A_75_P01042686	2	202640
A_75_P01042848		2	204323	-0.2	-0.15	-0.26			A_75_P01042720	2	202986
A_75_P01042940		2	205204	-0.34	-0.44	-0.24			A_75_P01042758	2	203385
A_75_P01043015		2	205992	-0.03	-0.07	0.26			A_75_P01042848	2	204323
A_75_P01043089		2	206721	-0.09	-0.08	-0.16			A_75_P01042940	2	205204
A_75_P01043150		2	207339	0.13	0.13	-0.04			A_75_P01043015	2	205992
A_75_P01043212		2	208001	-0.09	0.22	0.07			A_75_P01043089	2	206721
A_75_P01043281		2	208633	0.2	0.21	0.04			A_75_P01043150	2	207339
A_75_P01043359		2	209373	0.26	0.21	0.05			A_75_P01043212	2	208001
A_75_P01043443		2	210191	-0.22	-0.1	-0.2			A_75_P01043281	2	208633
A_75_P01043535		2	211104	0.3	0.09	-0.07			A_75_P01043359	2	209373
A_75_P01043621		2	211938	-0.06	-0.05	-0.02			A_75_P01043443	2	210191
A_75_P01043652		2	212283	0.26	0.26	0.02			A_75_P01043535	2	211104
A_75_P01043702		2	212807	0.3	0.15	-0.13			A_75_P01043621	2	211938
A_75_P01043772		2	213574	0.23	0.07	-0.17			A_75_P01043652	2	212283
A_75_P01043860		2	214484	0.46	0.43				A_75_P01043702	2	212807
A_75_P01043943		2	215327	-0.03	0.02	0.2			A_75_P01043772	2	213574
A_75_P01044019		2	216034	0.33	0.25	-0.05			A_75_P01043860	2	214484
A_75_P01044105		2	216896	0.34	0.45	-0.07			A_75_P01043943	2	215327
A_75_P01044167		2	217528	0.27	0.23	0.12			A_75_P01044019	2	216034
A_75_P01044261		2	218421	0.15	0.15				A_75_P01044105	2	216896
A_75_P01044328		2	219076	-0.02	-0.23	0.35			A_75_P01044167	2	217528
A_75_P01044405		2	219867	0.24	0.15	0.66			A_75_P01044261	2	218421
A_75_P01044472		2	220575	0.37	0.34	-0.09			A_75_P01044328	2	219076
A_75_P01045088		2	226877	0.62	0.46	0.38			A_75_P01044405	2	219867
A_75_P01045127		2	227244	0.35	0.25	0.2			A_75_P01044472	2	220575
A_75_P01045201		2	227997	0.17	0.22	0.26			A_75_P01045088	2	226877
A_75_P01045286		2	228885	-0.15	-0.4	0.23			A_75_P01045127	2	227244
A_75_P01045354		2	229554	0.08	0.06	-0.21			A_75_P01045201	2	227997
A_75_P01045471		2	230671	-0.22	-0.06	0.02			A_75_P01045286	2	228885
A_75_P01045539		2	231370	-0.36	-0.35	-0.07			A_75_P01045354	2	229554
A_75_P01045626		2	232222	0.15	0.03				A_75_P01045471	2	230671
A_75_P01045724		2	233190	-0.28	-0.39	0.92			A_75_P01045539	2	231370
A_75_P01045805		2	233982	-0.29	-0.45	-0.29			A_75_P01045626	2	232222
A_75_P01045891		2	234839	-0.02	-0.05	-0.27			A_75_P01045724	2	233190
A_75_P01046002		2	235962	0.09	0.19	-0.13			A_75_P01045805	2	233982
A_75_P01046080		2	236697	-0.15	-0.2				A_75_P01045891	2	234839
A_75_P01046161		2	237483	0.04	0.13	0.12			A_75_P01046002	2	235962
A_75_P01046182		2	237687	-0.16	-0.36				A_75_P01046080	2	236697
A_75_P01046222		2	238067	-0.07	0.06	0.18			A_75_P01046161	2	237483
A_75_P01046312		2	238977	0.21	0.09	-0.27			A_75_P01046182	2	237687
A_75_P01046387		2	239745	0.06	0.06				A_75_P01046222	2	238067
A_75_P01046455		2	240366	0.07	0.08	-0.15			A_75_P01046312	2	238977
A_75_P01046538		2	241231	-0.09	-0.03	-0.11			A_75_P01046387	2	239745
A_75_P01046646		2	242297	0.04	-0.04				A_75_P01046455	2	240366
A_75_P01046715		2	243019	-0.03	-0.1	0.33			A_75_P01046538	2	241231
A_75_P01046780		2	243687	0.04	-0.18				A_75_P01046646	2	242297
A_75_P01046871		2	244567	-0.22	-0.1	-0.33			A_75_P01046715	2	243019
A_75_P01046930		2	245148	-0.3	-0.29	-0.28			A_75_P01046780	2	243687
A_75_P01047006		2	245909	0.03	0.13	-0.04			A_75_P01046871	2	244567
A_75_P01047100		2	246805	0.01	-0.04	-0.51			A_75_P01046930	2	245148
A_75_P01047127		2	247149	-0.14	-0.1	-0.18			A_75_P01047006	2	245909
A_75_P01047179		2	247651	-0.32	-0.27	-0.06			A_75_P01047100	2	246805
A_75_P01047243		2	248271	-0.03	-0.11	2.94			A_75_P01047127	2	247149
A_75_P01047327		2	249139	0.39	0.26	0.19			A_75_P01047179	2	247651
A_75_P01047414		2	250008	-0.34	-0.05	0.01			A_75_P01047243	2	248271
A_75_P01047515		2	250978	-0.01	-0.05				A_75_P01047327	2	249139
A_75_P01047573		2	251584	0.05	0.04				A_75_P01047414	2	250008
A_75_P01047641		2	252221	-0.05	-0.1	1.53			A_75_P01047515	2	250978
A_75_P01047756		2	253356	-0.12	-0.15	-0.12			A_75_P01047573	2	251584
A_75_P01047861		2	254360	0.14	0.19	0.49			A_75_P01047641	2	252221
A_75_P01047986		2	255628	0.09	0.08	0.09			A_75_P01047756	2	253356
A_75_P01048085		2	256658	-0.08	-0.07	-0.12			A_75_P01047861	2	254360
A_75_P01048144		2	257254	0.17	0.18	-0.07			A_75_P01047986	2	255628
A_75_P01048165		2	257478	-0.03	-0.06	-0.11			A_75_P01048085	2	256658
A_75_P01048293		2	258779	0.34	0.45	1.64			A_75_P01048144	2	257254
A_75_P01048956		2	265418	0.46	0.4	-0.12			A_75_P01048165	2	257478
A_75_P01049032		2	266209	-0.34	-0.27	0.03			A_75_P01048293	2	258779
A_75_P01049131		2	267221	-0.41	0.13	-0.48			A_75_P01048956	2	265418
A_75_P01049204		2	267952	0.03	0.04	0.46			A_75_P01049032	2	266209
A_75_P01049286		2	268746	-0.07	-0.17	-0.24			A_75_P01049131	2	267221
A_75_P01049392		2	269871	-0.2	-0.02	-0.12			A_75_P01049204	2	267952
A_75_P01049460		2	270591	-0.25	-0.24				A_75_P01049286	2	268746
A_75_P01049545		2	271413	-0.07	0.36	0.22			A_75_P01049392	2	269871
A_75_P01049607		2	272073	0.24	0.23	0.01			A_75_P01049460	2	270591
A_75_P01049676		2	272789	-0.43	-0.09	-0.2			A_75_P01049545	2	271413
A_75_P01049695		2	272979	0.1	0.18	0.1			A_75_P01049607	2	272073
A_75_P01049759		2	273651	-0.08	-0.12	0.14			A_75_P01049676	2	272789
A_75_P01049826		2	274291	-0.11	-0.2	-0.06			A_75_P01049695	2	272979
A_75_P01049907		2	275141	0.3	0.19	0.08			A_75_P01049759	2	273651
A_75_P01049995		2	276008	-0.12	-0.11	1			A_75_P01049826	2	274291
A_75_P01050058		2	276651	0.09	0.1	0.16			A_75_P01049907	2	275141
A_75_P01050158		2	277640	-0.22	-0.32	0.85			A_75_P01049995	2	276008
A_75_P01050236		2	278441	-0.03	-0.2	-0.21			A_75_P01050058	2	276651
A_75_P01050328		2	279361	0	-0.13	0.04			A_75_P01050158	2	277640
A_75_P01050419		2	280294	-0.27	-0.27	0.12			A_75_P01050236	2	278441
A_75_P01050498		2	281102	-0.73	-0.15	0.22			A_75_P01050328	2	279361
A_75_P01050558		2	281729	0.25	0.25				A_75_P01050419	2	280294
A_75_P01050626		2	282367	0.21	0.15	-0.25			A_75_P01050498	2	281102
A_75_P01050654		2	282634	0.05	0.19	0.18			A_75_P01050558	2	281729
A_75_P01050697		2	283084	0.28	0.26	0.11			A_75_P01050626	2	282367
A_75_P01050780		2	283912	0.2	0	0.34			A_75_P01050654	2	282634
A_75_P01050843		2	284577	-0.1	-0.05	0.03			A_75_P01050697	2	283084
A_75_P01050920		2	285351	0.01	0	0.37			A_75_P01050780	2	283912
A_75_P01050995		2	286132	0.07	0.18	0.03			A_75_P01050843	2	284577
A_75_P01051081		2	286952	-0.29	0.01	-0.36			A_75_P01050920	2	285351
A_75_P01051181		2	287928	-0.24	-0.29	-0.14			A_75_P01050995	2	286132
A_75_P01051243		2	288604	0.05	0.07	-0.01			A_75_P01051081	2	286952
A_75_P01051339		2	289550	-0.15	-0.13	-0.38			A_75_P01051181	2	287928
A_75_P01051452		2	290669	0.33	0.23				A_75_P01051243	2	288604
A_75_P01051529		2	291449	0.13	0	-0.13			A_75_P01051339	2	289550
A_75_P01051621		2	292448	-0.23	-0.26	-0.26			A_75_P01051452	2	290669
A_75_P01051644		2	292690	-0.19	-0.06	0.39			A_75_P01051529	2	291449
A_75_P01051682		2	293080	0.07	0.07	0			A_75_P01051621	2	292448
A_75_P01051777		2	294013	0.41	0.28	-0.06			A_75_P01051644	2	292690
A_75_P01051881		2	295042	0.06	-0.06	0.04			A_75_P01051682	2	293080
A_75_P01051966		2	295921	-0.45	-0.39	-0.25			A_75_P01051777	2	294013
A_75_P01052027		2	296524	-0.34	0.02	-0.16			A_75_P01051881	2	295042
A_75_P01052102		2	297286	0.14	0.14	-0.26			A_75_P01051966	2	295921
A_75_P01052170		2	297987	0.11	0.11				A_75_P01052027	2	296524
A_75_P01052239		2	298627	-0.07	0.04	0.24			A_75_P01052102	2	297286
A_75_P01052322		2	299460	-0.02	-0.3				A_75_P01052170	2	297987
A_75_P01052485		2	301177	-0.12	0.16	0.36			A_75_P01052239	2	298627
A_75_P01052585		2	302194	0.25	0.11	0.89			A_75_P01052322	2	299460
A_75_P01052692		2	303236	-0.08	-0.27	0.17			A_75_P01052485	2	301177
A_75_P01052719		2	303536	-0.18	-0.09	-0.21			A_75_P01052585	2	302194
A_75_P01052761		2	303949	-0.07	-0.21	0.22			A_75_P01052692	2	303236
A_75_P01052837		2	304728	-0.26	-0.09	0.02			A_75_P01052719	2	303536
A_75_P01052914		2	305503	-0.24	-0.15	-0.22			A_75_P01052761	2	303949
A_75_P01052988		2	306245	-0.11	-0.16	-0.18			A_75_P01052837	2	304728
A_75_P01053079		2	307153	-0.07	-0.18	-0.04			A_75_P01052914	2	305503
A_75_P01053158		2	307907	0.1	0.1				A_75_P01052988	2	306245
A_75_P01053226		2	308565	0.25	0.15				A_75_P01053079	2	307153
A_75_P01053277		2	309086	0.34	0.25				A_75_P01053158	2	307907
A_75_P01053351		2	309842	0.4	0.39	0.78			A_75_P01053226	2	308565
A_75_P01053416		2	310494	-0.04	-0.02	0.29			A_75_P01053277	2	309086
A_75_P01053476		2	311100	0.12	0.22	0.55			A_75_P01053351	2	309842
A_75_P01053560		2	311980	0.35	0.33	-0.03			A_75_P01053416	2	310494
A_75_P01053595		2	312379	-0.01	0.25	-0.05			A_75_P01053476	2	311100
A_75_P01053644		2	312858	-0.06	-0.21				A_75_P01053560	2	311980
A_75_P01053733		2	313717	-0.1	-0.27	-0.17			A_75_P01053595	2	312379
A_75_P01053812		2	314535	0.12	0.11	0.57			A_75_P01053644	2	312858
A_75_P01053870		2	315133	-0.13	-0.14	0.02			A_75_P01053733	2	313717
A_75_P01053971		2	316112	0.3	0.32	-0.12			A_75_P01053812	2	314535
A_75_P01054047		2	316913	-0.28	-0.27	-0.11			A_75_P01053870	2	315133
A_75_P01054116		2	317581	0.02	0.05	0.14			A_75_P01053971	2	316112
A_75_P01054174		2	318181	0.1	0.15	0.08			A_75_P01054047	2	316913
A_75_P01054250		2	318950	-0.01	-0.04	0.38			A_75_P01054116	2	317581
A_75_P01054329		2	319755	0.29	0.28	0.03			A_75_P01054174	2	318181
A_75_P01054411		2	320548	-0.12	-0.18				A_75_P01054250	2	318950
A_75_P01054483		2	321301	-0.16	0	0.31			A_75_P01054329	2	319755
A_75_P01054514		2	321602	0.35	0.43	0.23			A_75_P01054411	2	320548
A_75_P01054576		2	322251	-0.35	0.03	-0.01			A_75_P01054483	2	321301
A_75_P01054647		2	322952	0.34	0.27	-0.1			A_75_P01054514	2	321602
A_75_P01054745		2	323927	-0.39	-0.24	-0.21			A_75_P01054576	2	322251
A_75_P01054812		2	324587	0.11	0.17	-0.14			A_75_P01054647	2	322952
A_75_P01054891		2	325410	-0.15	-0.16	0.33			A_75_P01054745	2	323927
A_75_P01054969		2	326230	-0.23	-0.28	-0.23			A_75_P01054812	2	324587
A_75_P01055041		2	326937	0.14	0.11	-0.09			A_75_P01054891	2	325410
A_75_P01055160		2	328135	0.27	0.32	-0.11			A_75_P01054969	2	326230
A_75_P01055223		2	328774	-0.17	-0.08	0.04			A_75_P01055041	2	326937
A_75_P01055296		2	329487	-0.15	-0.03	-0.06			A_75_P01055160	2	328135
A_75_P01055350		2	330068	-0.36	-0.57	0.4			A_75_P01055223	2	328774
A_75_P01055412		2	330733	0.36	0.21	0.44			A_75_P01055296	2	329487
A_75_P01055432		2	330939	-0.18	-0.1	0.04			A_75_P01055350	2	330068
A_75_P01055518		2	331773	0.15	-0.06	0.05			A_75_P01055412	2	330733
A_75_P01055629		2	332850	-0.17	-0.27	-0.19			A_75_P01055432	2	330939
A_75_P01055762		2	334201	-0.37	-0.25	0.3			A_75_P01055518	2	331773
A_75_P01055846		2	335068	0.18	0.01	-0.22			A_75_P01055629	2	332850
A_75_P01055930		2	335891	0.21	0.07	-0.14			A_75_P01055762	2	334201
A_75_P01056016		2	336712	0.04	0.08				A_75_P01055846	2	335068
A_75_P01056117		2	337718	-0.34	-0.09	0.07			A_75_P01055930	2	335891
A_75_P01056205		2	338617	-0.11	-0.08	-0.14			A_75_P01056016	2	336712
A_75_P01056272		2	339264	-0.24	-0.22	0.38			A_75_P01056117	2	337718
A_75_P01056339		2	339901	0.03	-0.03				A_75_P01056205	2	338617
A_75_P01056423		2	340690	-0.31	-0.38	-0.1			A_75_P01056272	2	339264
A_75_P01056502		2	341432	0.16	0.25	0.36			A_75_P01056339	2	339901
A_75_P01056521		2	341613	-0.47	-0.32	-0.33			A_75_P01056423	2	340690
A_75_P01056557		2	342020	-0.15	-0.03	-0.01			A_75_P01056502	2	341432
A_75_P01056617		2	342630	0.27	0.32	-0.12			A_75_P01056521	2	341613
A_75_P01056704		2	343476	-0.07	-0.04				A_75_P01056557	2	342020
A_75_P01056762		2	344164	-0.17	-0.25	0.21			A_75_P01056617	2	342630
A_75_P01056837		2	344881	-0.41	-0.16				A_75_P01056704	2	343476
A_75_P01056947		2	345975	-0.29	-0.19	-0.32			A_75_P01056762	2	344164
A_75_P01057045		2	346949	-0.09	-0.19	0.78			A_75_P01056837	2	344881
A_75_P01057117		2	347678	-0.47	-0.77	0.13			A_75_P01056947	2	345975
A_75_P01057180		2	348327	-0.09	-0.03	0.04			A_75_P01057045	2	346949
A_75_P01057234		2	348901	-0.29	-0.19	0.33			A_75_P01057117	2	347678
A_75_P01057354		2	350081	-0.26	-0.31	0.29			A_75_P01057180	2	348327
A_75_P01057432		2	350867	0.15	0.14	0.24			A_75_P01057234	2	348901
A_75_P01057465		2	351191	0.18	0.04	1.42			A_75_P01057354	2	350081
A_75_P01057520		2	351707	-0.15	-0.16	0.21			A_75_P01057432	2	350867
A_75_P01057627		2	352777	0.28	0.29	0			A_75_P01057465	2	351191
A_75_P01057722		2	353754	-0.08	-0.17	-0.25			A_75_P01057520	2	351707
A_75_P01057898		2	355507	0.21	-0.14	0.2			A_75_P01057627	2	352777
A_75_P01057988		2	356411	0.36	0.3	-0.13			A_75_P01057722	2	353754
A_75_P01058084		2	357451	-0.09	0.09	0.87			A_75_P01057898	2	355507
A_75_P01058175		2	358398	0	0.25	0.35			A_75_P01057988	2	356411
A_75_P01058252		2	359132	-0.03	-0.04	0.08			A_75_P01058084	2	357451
A_75_P01058328		2	359964	-0.2	-0.24	0.37			A_75_P01058175	2	358398
A_75_P01058398		2	360656	0.13	0.1	0.23			A_75_P01058252	2	359132
A_75_P01058487		2	361556	-0.2	-0.34	0.08			A_75_P01058328	2	359964
A_75_P01058521		2	361903	0	-0.1	-0.02			A_75_P01058398	2	360656
A_75_P01058574		2	362428	0.06	-0.03	0.51			A_75_P01058487	2	361556
A_75_P01058684		2	363559	0.05	-0.1	-0.08			A_75_P01058521	2	361903
A_75_P01058759		2	364342	0.32	0.17	-0.36			A_75_P01058574	2	362428
A_75_P01058827		2	365042	-0.12	-0.19	-0.11			A_75_P01058684	2	363559
A_75_P01058914		2	365923	0.12	0.18	0.25			A_75_P01058759	2	364342
A_75_P01058985		2	366599	0.24	0.3	-0.01			A_75_P01058827	2	365042
A_75_P01059088		2	367591	-0.02	-0.05	2.13			A_75_P01058914	2	365923
A_75_P01059162		2	368386	0.07	0.05	1.14			A_75_P01058985	2	366599
A_75_P01059248		2	369251	-0.02	-0.05	-0.1			A_75_P01059088	2	367591
A_75_P01059342		2	370207	0.48	0.46	0.31			A_75_P01059162	2	368386
A_75_P01059426		2	371081	-0.04	0.05	0.43			A_75_P01059248	2	369251
A_75_P01059498		2	371883	0.01	-0.04	-0.02			A_75_P01059342	2	370207
A_75_P01059530		2	372276	0.13	0.02	-0.24			A_75_P01059426	2	371081
A_75_P01059576		2	372751	-0.05	-0.11	-0.04			A_75_P01059498	2	371883
A_75_P01059659		2	373570	-0.22	-0.31	-0.02			A_75_P01059530	2	372276
A_75_P01059743		2	374424	0	0.02	-0.02			A_75_P01059576	2	372751
A_75_P01059845		2	375405	0.4	0.29	-0.04			A_75_P01059659	2	373570
A_75_P01059911		2	376087	-0.01	0.08	-0.04			A_75_P01059743	2	374424
A_75_P01059980		2	376798	0.02	0.02	0.07			A_75_P01059845	2	375405
A_75_P01060078		2	377742	0.19	0.15	0.41			A_75_P01059911	2	376087
A_75_P01060141		2	378375	-0.05	-0.16	0.06			A_75_P01059980	2	376798
A_75_P01060226		2	379229	0.16	0.17	0.26			A_75_P01060078	2	377742
A_75_P01060320		2	380095	-0.15	-0.19	-0.14			A_75_P01060141	2	378375
A_75_P01060405		2	380970	0.07	0.01	0.14			A_75_P01060226	2	379229
A_75_P01060485		2	381775	-0.01	-0.01	-0.09			A_75_P01060320	2	380095
A_75_P01060523		2	382153	-0.31	-0.14	0.03			A_75_P01060405	2	380970
A_75_P01060583		2	382776	-0.23	-0.16	0.05			A_75_P01060485	2	381775
A_75_P01060683		2	383765	-0.08	-0.1				A_75_P01060523	2	382153
A_75_P01060769		2	384640	-0.25	-0.37	0			A_75_P01060583	2	382776
A_75_P01060846		2	385404	0.05	-0.06	0.15			A_75_P01060683	2	383765
A_75_P01060908		2	386036	0.15	0.14	1.04			A_75_P01060769	2	384640
A_75_P01060979		2	386757	-0.26	-0.21	-0.03			A_75_P01060846	2	385404
A_75_P01061048		2	387469	0.2	0.14	-0.18			A_75_P01060908	2	386036
A_75_P01061134		2	388310	0.45	0.34				A_75_P01060979	2	386757
A_75_P01061207		2	389070	-0.04	0.13	0.29			A_75_P01061048	2	387469
A_75_P01061287		2	389885	0.43	0.33	-0.02			A_75_P01061134	2	388310
A_75_P01061342		2	390463	0.21	0.32	0.14			A_75_P01061207	2	389070
A_75_P01061430		2	391312	-0.05	-0.09	-0.19			A_75_P01061287	2	389885
A_75_P01061477		2	391775	0.07	0.31	0.06			A_75_P01061342	2	390463
A_75_P01061538		2	392356	0.12	0				A_75_P01061430	2	391312
A_75_P01061620		2	393175	-0.26	-0.24	-0.17			A_75_P01061477	2	391775
A_75_P01061688		2	393804	0.14	-0.02	-0.17			A_75_P01061538	2	392356
A_75_P01061755		2	394477	0.11	-0.08	-0.06			A_75_P01061620	2	393175
A_75_P01061848		2	395496	0.6	0.64	-0.28			A_75_P01061688	2	393804
A_75_P01061939		2	396452	0.01	-0.1	0.38			A_75_P01061755	2	394477
A_75_P01062014		2	397188	0.01	-0.02	-0.05			A_75_P01061848	2	395496
A_75_P01062064		2	397714	-0.11	-0.11	-0.02			A_75_P01061939	2	396452
A_75_P01062145		2	398555	0.13	0.01	0.32			A_75_P01062014	2	397188
A_75_P01062238		2	399498	0.41	0.43	0.81			A_75_P01062064	2	397714
A_75_P01062308		2	400229	-0.06	0	-0.02			A_75_P01062145	2	398555
A_75_P01062406		2	401239	-0.38	0.01	-0.05			A_75_P01062238	2	399498
A_75_P01062425		2	401429	0.3	0.38	0.06			A_75_P01062308	2	400229
A_75_P01062462		2	401810	-0.17	-0.29				A_75_P01062406	2	401239
A_75_P01062583		2	403001	-0.19	-0.07	-0.22			A_75_P01062425	2	401429
A_75_P01062643		2	403579	-0.27	-0.15	-0.17			A_75_P01062462	2	401810
A_75_P01062699		2	404162	0.19	0.02				A_75_P01062583	2	403001
A_75_P01062785		2	405023	-0.05	-0.06				A_75_P01062643	2	403579
A_75_P01062889		2	406060	-0.05	0.27	-0.22			A_75_P01062699	2	404162
A_75_P01062951		2	406699	0.13	0.04	-0.15			A_75_P01062785	2	405023
A_75_P01063038		2	407578	-0.09	-0.04	-0.27			A_75_P01062889	2	406060
A_75_P01063120		2	408352	-0.26	-0.14	-0.16			A_75_P01062951	2	406699
A_75_P01063261		2	409802	-0.01	-0.09				A_75_P01063038	2	407578
A_75_P01063376		2	410922	-0.25	-0.09	0.08			A_75_P01063120	2	408352
A_75_P01063466		2	411808	-0.15	-0.25	-0.07			A_75_P01063261	2	409802
A_75_P01063485		2	411986	-0.16	-0.11				A_75_P01063376	2	410922
A_75_P01063524		2	412387	0.14	0.26	0.16			A_75_P01063466	2	411808
A_75_P01063595		2	413082	-0.18	-0.14	-0.22			A_75_P01063485	2	411986
A_75_P01063676		2	413918	-0.08	0.01	-0.25			A_75_P01063524	2	412387
A_75_P01063784		2	415011	-0.23	-0.23	-0.16			A_75_P01063595	2	413082
A_75_P01063863		2	415821	-0.63	-0.35	-0.13			A_75_P01063676	2	413918
A_75_P01063920		2	416437	0.07	0.18	-0.17			A_75_P01063784	2	415011
A_75_P01064014		2	417390	-0.21	-0.23	0.06			A_75_P01063863	2	415821
A_75_P01064112		2	418361	0.11	0.09	0.04			A_75_P01063920	2	416437
A_75_P01064218		2	419444	0.39	0.42	-0.17			A_75_P01064014	2	417390
A_75_P01064287		2	420160	0.39	0.27	0.68			A_75_P01064112	2	418361
A_75_P01064407		2	421407	-0.01	-0.07				A_75_P01064218	2	419444
A_75_P01064492		2	422332	-0.11	-0.35	-0.06			A_75_P01064287	2	420160
A_75_P01064542		2	422805	-0.3	-0.45	0.15			A_75_P01064407	2	421407
A_75_P01064602		2	423395	-0.51	-0.56	0.2			A_75_P01064492	2	422332
A_75_P01064702		2	424404	0.16	0	0.09			A_75_P01064542	2	422805
A_75_P01064756		2	424961	-0.32	-0.32	0.45			A_75_P01064602	2	423395
A_75_P01064833		2	425688	0.04	-0.04				A_75_P01064702	2	424404
A_75_P01064915		2	426535	0.39	0.37	-0.33			A_75_P01064756	2	424961
A_75_P01064988		2	427297	0.13	-0.05				A_75_P01064833	2	425688
A_75_P01065089		2	428344	-0.22	0.19	0.12			A_75_P01064915	2	426535
A_75_P01065147		2	428945	-0.07	-0.03	0.24			A_75_P01064988	2	427297
A_75_P01065260		2	430031	0.15	0.11	0.73			A_75_P01065089	2	428344
A_75_P01065350		2	430989	-0.04	0.03	-0.08			A_75_P01065147	2	428945
A_75_P01065455		2	432010	0.06	0.1				A_75_P01065260	2	430031
A_75_P01065531		2	432798	0.06	0.05	-0.17			A_75_P01065350	2	430989
A_75_P01065566		2	433129	-0.1	-0.21				A_75_P01065455	2	432010
A_75_P01065619		2	433647	-0.19	-0.19	0.19			A_75_P01065531	2	432798
A_75_P01065732		2	434788	0.05	0.1	-0.02			A_75_P01065566	2	433129
A_75_P01065813		2	435599	-0.01	0.22	-0.13			A_75_P01065619	2	433647
A_75_P01065887		2	436355	0.14	0.11	0.16			A_75_P01065732	2	434788
A_75_P01065957		2	437084	0.27	0.1	0.03			A_75_P01065813	2	435599
A_75_P01066061		2	438082	-0.18	-0.28	-0.27			A_75_P01065887	2	436355
A_75_P01066130		2	438754	-0.21	-0.29				A_75_P01065957	2	437084
A_75_P01066244		2	439847	-0.1	-0.19	-0.13			A_75_P01066061	2	438082
A_75_P01066303		2	440457	-0.06	-0.05	0.46			A_75_P01066130	2	438754
A_75_P01066392		2	441303	-0.4	-0.41	-0.25			A_75_P01066244	2	439847
A_75_P01066482		2	442245	0.15	0.27	0.67			A_75_P01066303	2	440457
A_75_P01066584		2	443314	-0.42	-0.3	-0.16			A_75_P01066392	2	441303
A_75_P01066612		2	443588	0.16	0.18	-0.27			A_75_P01066482	2	442245
A_75_P01066679		2	444257	0.36	0.28				A_75_P01066584	2	443314
A_75_P01066752		2	445030	-0.05	-0.11	-0.17			A_75_P01066612	2	443588
A_75_P01066821		2	445725	0.11	0.05	0.1			A_75_P01066679	2	444257
A_75_P01066895		2	446434	0.41	0.39	-0.24			A_75_P01066752	2	445030
A_75_P01067003		2	447554	-0.19	-0.24	0.06			A_75_P01066821	2	445725
A_75_P01067101		2	448558	-0.14	-0.25	0.08			A_75_P01066895	2	446434
A_75_P01067276		2	450302	-0.02	-0.06	0.9			A_75_P01067003	2	447554
A_75_P01067350		2	451078	-0.22	-0.14	0.36			A_75_P01067101	2	448558
A_75_P01067410		2	451715	-0.31	-0.32	0			A_75_P01067276	2	450302
A_75_P01067469		2	452318	0.02	-0.02	-0.08			A_75_P01067350	2	451078
A_75_P01067532		2	452882	0.08	0.11	-0.15			A_75_P01067410	2	451715
A_75_P01067558		2	453157	0.18	0.09	1.23			A_75_P01067469	2	452318
A_75_P01067610		2	453654	0.12	0.02	0.32			A_75_P01067532	2	452882
A_75_P01067693		2	454446	-0.27	-0.28	-0.18			A_75_P01067558	2	453157
A_75_P01067760		2	455154	0.53	0.44	0.1			A_75_P01067610	2	453654
A_75_P01067858		2	456214	-0.03	-0.12	0.23			A_75_P01067693	2	454446
A_75_P01067927		2	456980	-0.34	0.07	-0.19			A_75_P01067760	2	455154
A_75_P01067998		2	457701	-0.07	-0.16	-0.11			A_75_P01067858	2	456214
A_75_P01068086		2	458585	0.13	0.17	1.21			A_75_P01067927	2	456980
A_75_P01068147		2	459253	-0.1	-0.04	0.18			A_75_P01067998	2	457701
A_75_P01068210		2	459925	-0.07	-0.04	0.12			A_75_P01068086	2	458585
A_75_P01068281		2	460645	0.37	0.36	0.03			A_75_P01068147	2	459253
A_75_P01068377		2	461661	0.03	0.08	0.01			A_75_P01068210	2	459925
A_75_P01068434		2	462224	-0.33	-0.28	-0.02			A_75_P01068281	2	460645
A_75_P01068457		2	462455	-0.39	-0.49	-0.14			A_75_P01068377	2	461661
A_75_P01068507		2	462943	0.15	0.13	-0.22			A_75_P01068434	2	462224
A_75_P01068580		2	463657	0	0.06	-0.19			A_75_P01068457	2	462455
A_75_P01068639		2	464259	0.31	0.25	0.01			A_75_P01068507	2	462943
A_75_P01068718		2	465097	-0.15	-0.11	-0.17			A_75_P01068580	2	463657
A_75_P01068825		2	466160	-0.1	-0.27	-0.15			A_75_P01068639	2	464259
A_75_P01068913		2	467060	-0.38	-0.4	-0.15			A_75_P01068718	2	465097
A_75_P01068999		2	467938	-0.1	-0.1	-0.35			A_75_P01068825	2	466160
A_75_P01069101		2	468982	-0.35	-0.38	-0.38			A_75_P01068913	2	467060
A_75_P01069184		2	469818	-0.23	-0.36	-0.08			A_75_P01068999	2	467938
A_75_P01069253		2	470518	-0.06	-0.07	-0.06			A_75_P01069101	2	468982
A_75_P01069343		2	471453	-0.36	-0.3	-0.36			A_75_P01069184	2	469818
A_75_P01069422		2	472259	-0.24	-0.24	0.15			A_75_P01069253	2	470518
A_75_P01069446		2	472496	0.51	0.48	-0.12			A_75_P01069343	2	471453
A_75_P01069492		2	472962	0.32	0.33	0.28			A_75_P01069422	2	472259
A_75_P01069578		2	473848	-0.02	-0.05	0.13			A_75_P01069446	2	472496
A_75_P01069703		2	475139	0.18	0.1				A_75_P01069492	2	472962
A_75_P01069776		2	475896	0.17	0.02				A_75_P01069578	2	473848
A_75_P01069851		2	476678	-0.24	-0.34	-0.1			A_75_P01069703	2	475139
A_75_P01069921		2	477386	0.02	0.45	0.13			A_75_P01069776	2	475896
A_75_P01070090		2	479233	-0.25	-0.4	0.92			A_75_P01069851	2	476678
A_75_P01070190		2	480245	-0.27	-0.14	-0.23			A_75_P01069921	2	477386
A_75_P01070274		2	481088	-0.22	-0.05	1.99			A_75_P01070090	2	479233
A_75_P01070346		2	481827	0.33	0.27				A_75_P01070190	2	480245
A_75_P01070412		2	482464	0.3	0.16	0.11			A_75_P01070274	2	481088
A_75_P01070490		2	483224	-0.27	-0.14	0.5			A_75_P01070346	2	481827
A_75_P01070518		2	483533	-0.23	-0.2	0.18			A_75_P01070412	2	482464
A_75_P01070591		2	484288	-0.19	-0.14				A_75_P01070490	2	483224
A_75_P01070677		2	485202	0.06	0.09	0.19			A_75_P01070518	2	483533
A_75_P01070758		2	486012	-0.09	-0.16	0.07			A_75_P01070591	2	484288
A_75_P01070860		2	487057	-0.05	-0.11	-0.13			A_75_P01070677	2	485202
A_75_P01070967		2	488160	0.15	0.21	0.07			A_75_P01070758	2	486012
A_75_P01071051		2	488955	0.15	0.12	0.16			A_75_P01070860	2	487057
A_75_P01071119		2	489725	-0.18	-0.1	-0.12			A_75_P01070967	2	488160
A_75_P01071218		2	490788	0.18	0.16	-0.19			A_75_P01071051	2	488955
A_75_P01071321		2	491806	0	0.06	-0.21			A_75_P01071119	2	489725
A_75_P01071413		2	492772	0.27	0.24	0.13			A_75_P01071218	2	490788
A_75_P01071491		2	493640	0.12	0.1	0.36			A_75_P01071321	2	491806
A_75_P01071582		2	494549	0.06	0	0.04			A_75_P01071413	2	492772
A_75_P01071629		2	495007	-0.25	-0.18	0.22			A_75_P01071491	2	493640
A_75_P01071707		2	495794	0.35	0.38	0.03			A_75_P01071582	2	494549
A_75_P01071812		2	496784	0.25	0.24	0.1			A_75_P01071629	2	495007
A_75_P01071900		2	497631	-0.34	-0.17	1.09			A_75_P01071707	2	495794
A_75_P01071971		2	498344	-0.11	0.02	0.05			A_75_P01071812	2	496784
A_75_P01072052		2	499130	0	0.03	-0.17			A_75_P01071900	2	497631
A_75_P01072111		2	499691	0.06	0				A_75_P01071971	2	498344
A_75_P01072205		2	500579	-0.09	0.06	0.12			A_75_P01072052	2	499130
A_75_P01072294		2	501534	0.02	-0.03	-0.33			A_75_P01072111	2	499691
A_75_P01072352		2	502111	0.38	0.34	0.12			A_75_P01072205	2	500579
A_75_P01072412		2	502727	0.11	0.45	0.84			A_75_P01072294	2	501534
A_75_P01072487		2	503488	-0.21	-0.32	-0.24			A_75_P01072352	2	502111
A_75_P01072569		2	504372	0.07	0.15	-0.26			A_75_P01072412	2	502727
A_75_P01072606		2	504697	0.38	0.4	-0.2			A_75_P01072487	2	503488
A_75_P01072655		2	505224	0.08	0.13	0.01			A_75_P01072569	2	504372
A_75_P01072733		2	506039	0.06	0.06	0.14			A_75_P01072606	2	504697
A_75_P01072832		2	507065	-0.09	0.01	0.57			A_75_P01072655	2	505224
A_75_P01072894		2	507687	-0.54	-0.48	-0.27			A_75_P01072733	2	506039
A_75_P01072963		2	508377	-0.1	-0.16	0.01			A_75_P01072832	2	507065
A_75_P01073052		2	509306	-0.07	-0.34	0.86			A_75_P01072894	2	507687
A_75_P01073140		2	510191	0.06	-0.01	0.17			A_75_P01072963	2	508377
A_75_P01073210		2	510839	0.18	0.24	-0.12			A_75_P01073052	2	509306
A_75_P01073293		2	511682	-0.13	-0.11	0.31			A_75_P01073140	2	510191
A_75_P01073391		2	512656	-0.17	-0.07	-0.05			A_75_P01073210	2	510839
A_75_P01073499		2	513784	-0.21	-0.04				A_75_P01073293	2	511682
A_75_P01073587		2	514645	0.21	0.07	-0.17			A_75_P01073391	2	512656
A_75_P01073615		2	514936	0.1	0.14	-0.09			A_75_P01073499	2	513784
A_75_P01073663		2	515423	-0.22	-0.06	1.42			A_75_P01073587	2	514645
A_75_P01073769		2	516489	0.02	0.12	-0.17			A_75_P01073615	2	514936
A_75_P01073834		2	517155	-0.07	-0.01	-0.03			A_75_P01073663	2	515423
A_75_P01073902		2	517845	-0.48	-0.57	-0.59			A_75_P01073769	2	516489
A_75_P01073960		2	518410	0.15	0.12	-0.23			A_75_P01073834	2	517155
A_75_P01074040		2	519273	-0.09	-0.21	-0.21			A_75_P01073902	2	517845
A_75_P01074119		2	520036	-0.21	-0.34	0.07			A_75_P01073960	2	518410
A_75_P01074218		2	521017	-0.39	-0.47				A_75_P01074040	2	519273
A_75_P01074296		2	521806	-0.21	-0.1	-0.06			A_75_P01074119	2	520036
A_75_P01074401		2	522909	-0.2	-0.23	-0.05			A_75_P01074218	2	521017
A_75_P01074472		2	523561	-0.04	-0.11	0.89			A_75_P01074296	2	521806
A_75_P01074549		2	524349	-0.12	-0.2	0.23			A_75_P01074401	2	522909
A_75_P01074564		2	524528	-0.07	-0.17	-0.34			A_75_P01074472	2	523561
A_75_P01074632		2	525212	0.24	0.24	0.02			A_75_P01074549	2	524349
A_75_P01074729		2	526242	-0.34	-0.52	-0.25			A_75_P01074564	2	524528
A_75_P01074800		2	526914	-0.16	-0.15	0.03			A_75_P01074632	2	525212
A_75_P01074880		2	527733	0.01	0.14	-0.11			A_75_P01074729	2	526242
A_75_P01074979		2	528755	-0.07	0.07	0.15			A_75_P01074800	2	526914
A_75_P01075116		2	530075	-0.15	-0.08	0.97			A_75_P01074880	2	527733
A_75_P01075223		2	531202	-0.64	-0.3	-0.78			A_75_P01074979	2	528755
A_75_P01075288		2	531913	-0.03	-0.2	-0.54			A_75_P01075116	2	530075
A_75_P01075360		2	532621	0.31	0.55	0.84			A_75_P01075223	2	531202
A_75_P01075427		2	533362	0.28	0.23	-0.02			A_75_P01075288	2	531913
A_75_P01075499		2	534039	0.2	0.16	-0.12			A_75_P01075360	2	532621
A_75_P01075564		2	534728	0.05	0.11	0.23			A_75_P01075427	2	533362
A_75_P01075584		2	534919	-0.02	-0.15	0.03			A_75_P01075499	2	534039
A_75_P01075645		2	535548	-0.18	-0.14	-0.14			A_75_P01075564	2	534728
A_75_P01075754		2	536664	0.36	0.38	0.11			A_75_P01075584	2	534919
A_75_P01075828		2	537420	-0.06	0.05	-0.08			A_75_P01075645	2	535548
A_75_P01075917		2	538337	-0.34	-0.21	0.01			A_75_P01075754	2	536664
A_75_P01075991		2	539063	-0.22	-0.34	-0.09			A_75_P01075828	2	537420
A_75_P01076077		2	539869	0.2	0.3	0.18			A_75_P01075917	2	538337
A_75_P01076167		2	540755	-0.09	-0.04				A_75_P01075991	2	539063
A_75_P01076253		2	541612	0.23	0.27	-0.09			A_75_P01076077	2	539869
A_75_P01076340		2	542501	-0.1	-0.09	-0.05			A_75_P01076167	2	540755
A_75_P01076485		2	543906	0.32	0.17	0.26			A_75_P01076253	2	541612
A_75_P01076549		2	544549	-0.07	-0.13	0.13			A_75_P01076340	2	542501
A_75_P01076563		2	544713	-0.31	-0.61	-0.1			A_75_P01076485	2	543906
A_75_P01076609		2	545168	0.1	0.14	0.03			A_75_P01076549	2	544549
A_75_P01076673		2	545819	-0.2	-0.34	0.06			A_75_P01076563	2	544713
A_75_P01076758		2	546643	0.33	0.09	0.78			A_75_P01076609	2	545168
A_75_P01076852		2	547592	0.22	0.12	-0.21			A_75_P01076673	2	545819
A_75_P01076975		2	548878	0.12	0.29	-0.33			A_75_P01076758	2	546643
A_75_P01077046		2	549659	-0.09	-0.12	0.12			A_75_P01076852	2	547592
A_75_P01077150		2	550719	0.15	0.18	0.03			A_75_P01076975	2	548878
A_75_P01077271		2	551908	0.27	0.19				A_75_P01077046	2	549659
A_75_P01077371		2	552922	-0.02	0.08	-0.06			A_75_P01077150	2	550719
A_75_P01077454		2	553740	0.03	-0.08	3.45			A_75_P01077271	2	551908
A_75_P01077531		2	554502	-0.02	0.05	0.11			A_75_P01077371	2	552922
A_75_P01077612		2	555332	-0.03	-0.18	0			A_75_P01077454	2	553740
A_75_P01077635		2	555544	0.18	0.21	0.49			A_75_P01077531	2	554502
A_75_P01077686		2	556075	0.05	-0.04	0.06			A_75_P01077612	2	555332
A_75_P01077760		2	556868	0.33	0.37				A_75_P01077635	2	555544
A_75_P01077816		2	557437	-0.05	-0.13	-0.02			A_75_P01077686	2	556075
A_75_P01077910		2	558338	-0.46	-0.68	-0.22			A_75_P01077760	2	556868
A_75_P01077971		2	558946	-0.12	-0.25	-0.13			A_75_P01077816	2	557437
A_75_P01078041		2	559649	-0.51	-0.51	-0.15			A_75_P01077910	2	558338
A_75_P01078121		2	560446	-0.22	-0.2	0.21			A_75_P01077971	2	558946
A_75_P01078199		2	561189	-0.49	-0.82	0.05			A_75_P01078041	2	559649
A_75_P01078283		2	562031	0.05	-0.03				A_75_P01078121	2	560446
A_75_P01078380		2	563048	-0.48	-0.52				A_75_P01078199	2	561189
A_75_P01078454		2	563796	0.02	0.03	-0.04			A_75_P01078283	2	562031
A_75_P01078551		2	564792	-0.18	-0.14	-0.01			A_75_P01078380	2	563048
A_75_P01078576		2	565024	0.29	0.42	0.34			A_75_P01078454	2	563796
A_75_P01078624		2	565507	0.2	0.14	0.25			A_75_P01078551	2	564792
A_75_P01078719		2	566475	-0.06	-0.07	-0.19			A_75_P01078576	2	565024
A_75_P01078799		2	567302	0.07	-0.19				A_75_P01078624	2	565507
A_75_P01078871		2	568039	-0.13	-0.01	0.64			A_75_P01078719	2	566475
A_75_P01078966		2	568986	0.09	0.03	-0.09			A_75_P01078799	2	567302
A_75_P01079068		2	570028	-0.09	-0.19	-0.04			A_75_P01078871	2	568039
A_75_P01079134		2	570676	0.04	-0.05				A_75_P01078966	2	568986
A_75_P01079192		2	571286	-0.15	-0.71				A_75_P01079068	2	570028
A_75_P01079277		2	572141	-0.48	-0.25	-0.04			A_75_P01079134	2	570676
A_75_P01079346		2	572798	0.13	0	0.11			A_75_P01079192	2	571286
A_75_P01079438		2	573679	-0.08	0.04	0.09			A_75_P01079277	2	572141
A_75_P01079519		2	574497	-0.2	-0.08				A_75_P01079346	2	572798
A_75_P01079543		2	574742	-0.11	-0.15				A_75_P01079438	2	573679
A_75_P01079637		2	575668	-0.46	-0.14	0.04			A_75_P01079519	2	574497
A_75_P01079736		2	576680	-0.05	0.01	0.04			A_75_P01079543	2	574742
A_75_P01079799		2	577325	0.01	0	-0.24			A_75_P01079637	2	575668
A_75_P01079891		2	578250	-0.6	-0.06	-0.24			A_75_P01079736	2	576680
A_75_P01079977		2	579082	0.2	0.23	-0.06			A_75_P01079799	2	577325
A_75_P01080036		2	579688	0.09	0.18	-0.07			A_75_P01079891	2	578250
A_75_P01080109		2	580494	-0.01	0.12	-0.09			A_75_P01079977	2	579082
A_75_P01080212		2	581538	-0.07	0	0.25			A_75_P01080036	2	579688
A_75_P01080295		2	582389	-0.15	-0.11	-0.07			A_75_P01080109	2	580494
A_75_P01080368		2	583145	0.02	-0.19	-0.1			A_75_P01080212	2	581538
A_75_P01080508		2	584514	0.22	0.13	-0.23			A_75_P01080295	2	582389
A_75_P01080568		2	585219	-0.1	-0.03	0.02			A_75_P01080368	2	583145
A_75_P01080590		2	585446	0.15	0.03				A_75_P01080508	2	584514
A_75_P01080643		2	585986	-0.15	-0.19	0.13			A_75_P01080568	2	585219
A_75_P01080730		2	586873	0.29	0.18	0.51			A_75_P01080590	2	585446
A_75_P01080812		2	587689	-0.22	-0.21	0.22			A_75_P01080643	2	585986
A_75_P01080893		2	588511	-0.39	-0.4	0.03			A_75_P01080730	2	586873
A_75_P01080976		2	589338	0.07	-0.03	0.22			A_75_P01080812	2	587689
A_75_P01081050		2	590108	0	-0.01	0.11			A_75_P01080893	2	588511
A_75_P01081142		2	591042	-0.1	-0.14	-0.19			A_75_P01080976	2	589338
A_75_P01081202		2	591658	0.22	0.88	-0.15			A_75_P01081050	2	590108
A_75_P01081314		2	592805	0.03	-0.02	0.15			A_75_P01081142	2	591042
A_75_P01081373		2	593437	-0.15	-0.24	-0.12			A_75_P01081202	2	591658
A_75_P01081426		2	593999	-0.35	-0.17	-0.34			A_75_P01081314	2	592805
A_75_P01081495		2	594698	-0.07	-0.22	0.02			A_75_P01081373	2	593437
A_75_P01081514		2	594895	-0.43	-0.12	0.27			A_75_P01081426	2	593999
A_75_P01081583		2	595583	-0.04	-0.16	0.61			A_75_P01081495	2	594698
A_75_P01081685		2	596538	0.19	0.09	0.32			A_75_P01081514	2	594895
A_75_P01081769		2	597395	-0.25	-0.25	-0.29			A_75_P01081583	2	595583
A_75_P01081832		2	597999	-0.02	-0.04	0.21			A_75_P01081685	2	596538
A_75_P01081907		2	598743	-0.11	0.05	0.1			A_75_P01081769	2	597395
A_75_P01082024		2	599869	-0.13	-0.09	-0.21			A_75_P01081832	2	597999
A_75_P01082131		2	600907	0.07	0.04				A_75_P01081907	2	598743
A_75_P01082213		2	601732	0.12	0.17	-0.05			A_75_P01082024	2	599869
A_75_P01082277		2	602327	0.18	0.32	0.04			A_75_P01082131	2	600907
A_75_P01082352		2	603111	0.2	0.25	0.2			A_75_P01082213	2	601732
A_75_P01082424		2	603874	0.07	-0.09	1.29			A_75_P01082277	2	602327
A_75_P01082514		2	604758	0.4	0.06	0.12			A_75_P01082352	2	603111
A_75_P01082547		2	605094	0.27	0.35	0.29			A_75_P01082424	2	603874
A_75_P01082597		2	605631	-0.02	-0.04	-0.09			A_75_P01082514	2	604758
A_75_P01082698		2	606670	-0.05	-0.16	-0.15			A_75_P01082547	2	605094
A_75_P01082752		2	607248	-0.01	-0.03				A_75_P01082597	2	605631
A_75_P01082824		2	607955	0.01	-0.04	-0.34			A_75_P01082698	2	606670
A_75_P01082915		2	608872	-0.18	-0.09	0.3			A_75_P01082752	2	607248
A_75_P01082992		2	609676	0.31	0.28	-0.01			A_75_P01082824	2	607955
A_75_P01083062		2	610380	-0.34	-0.27	-0.12			A_75_P01082915	2	608872
A_75_P01083129		2	611082	0.04	0.04	-0.23			A_75_P01082992	2	609676
A_75_P01083188		2	611702	0.22	0.21	-0.09			A_75_P01083062	2	610380
A_75_P01083266		2	612581	-0.09	-0.09	-0.26			A_75_P01083129	2	611082
A_75_P01083341		2	613383	0.06	0.02	-0.12			A_75_P01083188	2	611702
A_75_P01083436		2	614327	-0.04	-0.11	-0.04			A_75_P01083266	2	612581
A_75_P01083465		2	614628	-0.19	-0.18	-0.22			A_75_P01083341	2	613383
A_75_P01083524		2	615239	0.25	0.28	-0.12			A_75_P01083436	2	614327
A_75_P01083602		2	616044	-0.1	0.04	0.07			A_75_P01083465	2	614628
A_75_P01083683		2	616855	0.16	0.17	0.19			A_75_P01083524	2	615239
A_75_P01083755		2	617588	0.05	-0.01	0.1			A_75_P01083602	2	616044
A_75_P01083834		2	618434	0.46	0.45	-0.25			A_75_P01083683	2	616855
A_75_P01083931		2	619416	0.22	0.22				A_75_P01083755	2	617588
A_75_P01084002		2	620150	-0.26	-0.26	0.58			A_75_P01083834	2	618434
A_75_P01084083		2	620993	-0.41	-0.28	-0.16			A_75_P01083931	2	619416
A_75_P01084154		2	621715	0.12	0.13	-0.27			A_75_P01084002	2	620150
A_75_P01084210		2	622308	-0.75	0.05	-0.11			A_75_P01084083	2	620993
A_75_P01084315		2	623319	-0.13	-0.2	-0.04			A_75_P01084154	2	621715
A_75_P01084391		2	624084	0.03	0.05	-0.17			A_75_P01084210	2	622308
A_75_P01084423		2	624451	0.03	-0.04	0.16			A_75_P01084315	2	623319
A_75_P01084462		2	624857	0.03	-0.04	0.1			A_75_P01084391	2	624084
A_75_P01084549		2	625735	0.23	0.3	-0.03			A_75_P01084423	2	624451
A_75_P01084640		2	626598	0.22	0.1				A_75_P01084462	2	624857
A_75_P01084718		2	627342	-0.12	0.09	0.58			A_75_P01084549	2	625735
A_75_P01084813		2	628273	0.42	0.33	-0.17			A_75_P01084640	2	626598
A_75_P01084869		2	628922	-0.1	-0.15	0.07			A_75_P01084718	2	627342
A_75_P01084932		2	629544	-0.07	0.01	0.44			A_75_P01084813	2	628273
A_75_P01085023		2	630480	-0.37	-0.1	0.12			A_75_P01084869	2	628922
A_75_P01085121		2	631539	-0.26	-0.13	0.05			A_75_P01084932	2	629544
A_75_P01085221		2	632568	-0.06	-0.06	0.23			A_75_P01085023	2	630480
A_75_P01085279		2	633155	-0.27	-0.42	-0.15			A_75_P01085121	2	631539
A_75_P01085364		2	634067	-0.03	-0.05	0.05			A_75_P01085221	2	632568
A_75_P01085421		2	634641	-0.12	-0.11	-0.02			A_75_P01085279	2	633155
A_75_P01085492		2	635379	0.11	0.03	0.49			A_75_P01085364	2	634067
A_75_P01085547		2	635935	0.33	0.08				A_75_P01085421	2	634641
A_75_P01085646		2	636904	0.2	0.17				A_75_P01085492	2	635379
A_75_P01085766		2	638149	-0.05	0.1	0.08			A_75_P01085547	2	635935
A_75_P01085852		2	639042	-0.01	-0.01	-0.02			A_75_P01085646	2	636904
A_75_P01085941		2	639905	-0.37	0	0.64			A_75_P01085766	2	638149
A_75_P01086030		2	640780	0.04	0	0.13			A_75_P01085852	2	639042
A_75_P01086102		2	641479	-0.23	-0.07	-0.05			A_75_P01085941	2	639905
A_75_P01086203		2	642528	0.11	0.06	-0.07			A_75_P01086030	2	640780
A_75_P01086325		2	643801	-0.13	0.14	0.19			A_75_P01086102	2	641479
A_75_P01086439		2	644960	-0.26	-0.35	0.12			A_75_P01086203	2	642528
A_75_P01086473		2	645276	-0.06	-0.1	-0.07			A_75_P01086325	2	643801
A_75_P01086541		2	645947	-0.17	0.34	-0.05			A_75_P01086439	2	644960
A_75_P01086619		2	646726	0.12	0.05				A_75_P01086473	2	645276
A_75_P01086683		2	647346	-0.09	-0.2	0.09			A_75_P01086541	2	645947
A_75_P01086751		2	648045	-0.15	-0.01	0.14			A_75_P01086619	2	646726
A_75_P01086840		2	648947	-0.02	0				A_75_P01086683	2	647346
A_75_P01086921		2	649746	0.11	-0.11	0.01			A_75_P01086751	2	648045
A_75_P01086989		2	650429	0.25	0.35	0.82			A_75_P01086840	2	648947
A_75_P01087074		2	651249	0.07	0.09	-0.09			A_75_P01086921	2	649746
A_75_P01087188		2	652386	0.18	0.26	-0.14			A_75_P01086989	2	650429
A_75_P01087268		2	653243	-0.12	0.1	0.05			A_75_P01087074	2	651249
A_75_P01087374		2	654300	0.02	-0.06	0.08			A_75_P01087188	2	652386
A_75_P01087458		2	655169	-0.03	-0.08				A_75_P01087268	2	653243
A_75_P01087486		2	655471	-0.14	-0.21	0.02			A_75_P01087374	2	654300
A_75_P01087536		2	655973	-0.18	-0.16	-0.52			A_75_P01087458	2	655169
A_75_P01087661		2	657251	0.21	-0.04	0.01			A_75_P01087486	2	655471
A_75_P01087747		2	658061	-0.43	-0.41	-0.4			A_75_P01087536	2	655973
A_75_P01087831		2	658929	0.31	0.28	0.78			A_75_P01087661	2	657251
A_75_P01087915		2	659798	0.16	0.11	-0.09			A_75_P01087747	2	658061
A_75_P01088000		2	660701	-0.15	-0.04	-0.18			A_75_P01087831	2	658929
A_75_P01088096		2	661690	0.08	0	-0.01			A_75_P01087915	2	659798
A_75_P01088160		2	662404	0.11	0.13	0.2			A_75_P01088000	2	660701
A_75_P01088245		2	663291	0.05	0.06	-0.37			A_75_P01088096	2	661690
A_75_P01088354		2	664460	0.02	0.03	0.07			A_75_P01088160	2	662404
A_75_P01088450		2	665449	-0.15	-0.36	0.52			A_75_P01088245	2	663291
A_75_P01088530		2	666238	-0.53	-0.27	-0.11			A_75_P01088354	2	664460
A_75_P01088560		2	666538	-0.28	-0.35	0.56			A_75_P01088450	2	665449
A_75_P01088609		2	667069	0.19	0.12	-0.15			A_75_P01088530	2	666238
A_75_P01088682		2	667802	-0.12	0.03	0.34			A_75_P01088560	2	666538
A_75_P01088793		2	668973	-0.14	-0.02				A_75_P01088609	2	667069
A_75_P01088884		2	669847	0.02	0.06	-0.05			A_75_P01088682	2	667802
A_75_P01088978		2	670742	0.27	0.29	-0.14			A_75_P01088793	2	668973
A_75_P01089049		2	671488	0.15	0.2	0.04			A_75_P01088884	2	669847
A_75_P01089124		2	672238	0.17	0.17				A_75_P01088978	2	670742
A_75_P01089214		2	673166	-0.29	-0.42				A_75_P01089049	2	671488
A_75_P01089303		2	674053	0.22	0.25	-0.02			A_75_P01089124	2	672238
A_75_P01089405		2	675071	-0.08	-0.15	0.01			A_75_P01089214	2	673166
A_75_P01089468		2	675722	-0.3	-0.3	-0.02			A_75_P01089303	2	674053
A_75_P01089558		2	676583	0.35	0.28	0.08			A_75_P01089405	2	675071
A_75_P01089582		2	676820	-0.2	-0.33	-0.09			A_75_P01089468	2	675722
A_75_P01089639		2	677374	0.07	0.11	0.11			A_75_P01089558	2	676583
A_75_P01089719		2	678186	-0.15	-0.27	-0.15			A_75_P01089582	2	676820
A_75_P01089793		2	678928	0.17	0.07	-0.08			A_75_P01089639	2	677374
A_75_P01089902		2	679940	0.29	0.14	0.71			A_75_P01089719	2	678186
A_75_P01090009		2	681037	-0.05	0.09	-0.15			A_75_P01089793	2	678928
A_75_P01090113		2	682096	-0.14	-0.05	-0.05			A_75_P01089902	2	679940
A_75_P01090179		2	682831	0.09	0.23	-0.07			A_75_P01090009	2	681037
A_75_P01090246		2	683570	0.14	0.18	-0.09			A_75_P01090113	2	682096
A_75_P01090333		2	684424	0.11	0.1	-0.01			A_75_P01090179	2	682831
A_75_P01090426		2	685395	0.15	0.07	-0.03			A_75_P01090246	2	683570
A_75_P01090516		2	686332	0.19	0.06	0.03			A_75_P01090333	2	684424
A_75_P01090597		2	687147	0.21	0.12	-0.24			A_75_P01090426	2	685395
A_75_P01090616		2	687333	0.29	0.02	0.12			A_75_P01090516	2	686332
A_75_P01090663		2	687804	0.2	0.37	1.05			A_75_P01090597	2	687147
A_75_P01090759		2	688755	-0.02	-0.21	0.02			A_75_P01090616	2	687333
A_75_P01090831		2	689510	-0.05	0.03	-0.25			A_75_P01090663	2	687804
A_75_P01090918		2	690427	0.01	0	-0.31			A_75_P01090759	2	688755
A_75_P01090974		2	690989	-0.1	-0.04	0.09			A_75_P01090831	2	689510
A_75_P01091062		2	691851	-0.24	-0.22	0.56			A_75_P01090918	2	690427
A_75_P01091130		2	692552	-0.16	-0.23	0.04			A_75_P01090974	2	690989
A_75_P01091235		2	693629	-0.23	-0.3	0.69			A_75_P01091062	2	691851
A_75_P01091344		2	694675	-0.65	-0.46	-0.16			A_75_P01091130	2	692552
A_75_P01091419		2	695449	0.21	0.54	-0.17			A_75_P01091235	2	693629
A_75_P01091505		2	696349	0.36	0.28	-0.01			A_75_P01091344	2	694675
A_75_P01091609		2	697388	-0.08	0.08	1.33			A_75_P01091419	2	695449
A_75_P01091628		2	697596	-0.41	-0.13	0.7			A_75_P01091505	2	696349
A_75_P01091687		2	698171	0	-0.06	0.13			A_75_P01091609	2	697388
A_75_P01091755		2	698879	0.3	0.23	0.01			A_75_P01091628	2	697596
A_75_P01091851		2	699887	0.34	0.28				A_75_P01091687	2	698171
A_75_P01091936		2	700731	-0.25	0.05	-0.11			A_75_P01091755	2	698879
A_75_P01092019		2	701590	0.35	0.26	-0.3			A_75_P01091851	2	699887
A_75_P01092082		2	702232	0.01	-0.08	0.17			A_75_P01091936	2	700731
A_75_P01092147		2	702970	-0.08	-0.11	-0.41			A_75_P01092019	2	701590
A_75_P01092241		2	703991	0.52	0.53	-0.02			A_75_P01092082	2	702232
A_75_P01092314		2	704716	-0.1	0.09	-0.09			A_75_P01092147	2	702970
A_75_P01092401		2	705619	0.12	0.06	0.01			A_75_P01092241	2	703991
A_75_P01092485		2	706470	-0.21	-0.31				A_75_P01092314	2	704716
A_75_P01092550		2	707114	0.21	0.07	-0.08			A_75_P01092401	2	705619
A_75_P01092591		2	707523	0.17	0.08	0.18			A_75_P01092485	2	706470
A_75_P01092654		2	708159	0.26	0.15	-0.01			A_75_P01092550	2	707114
A_75_P01092724		2	708819	-0.09	0.14	-0.12			A_75_P01092591	2	707523
A_75_P01092827		2	709781	0.24	0.2	-0.23			A_75_P01092654	2	708159
A_75_P01092890		2	710428	-0.31	-0.03	-0.06			A_75_P01092724	2	708819
A_75_P01092984		2	711467	0	-0.12				A_75_P01092827	2	709781
A_75_P01093072		2	712323	0.27	0.2	-0.27			A_75_P01092890	2	710428
A_75_P01093140		2	713026	0.16	0.19	-0.07			A_75_P01092984	2	711467
A_75_P01093284		2	714476	-0.29	-0.28	0.07			A_75_P01093072	2	712323
A_75_P01093346		2	715159	0.47	0.37	-0.09			A_75_P01093140	2	713026
A_75_P01093429		2	716045	-0.48	0.38				A_75_P01093284	2	714476
A_75_P01093537		2	717078	-0.02	-0.04	0.03			A_75_P01093346	2	715159
A_75_P01093610		2	717863	-0.18	0.05	0.02			A_75_P01093429	2	716045
A_75_P01093645		2	718234	-0.17	-0.24	0.26			A_75_P01093537	2	717078
A_75_P01093686		2	718702	-0.27	-0.16	-0.09			A_75_P01093610	2	717863
A_75_P01093784		2	719693	-0.09	0.03	-0.24			A_75_P01093645	2	718234
A_75_P01093846		2	720315	-0.08	-0.12	0.28			A_75_P01093686	2	718702
A_75_P01093908		2	720940	-0.26	-0.23	-0.27			A_75_P01093784	2	719693
A_75_P01093964		2	721507	-0.31	-0.12	-0.15			A_75_P01093846	2	720315
A_75_P01094072		2	722553	-0.38	-0.23	-0.18			A_75_P01093908	2	720940
A_75_P01094146		2	723288	-0.09	-0.21	-0.15			A_75_P01093964	2	721507
A_75_P01094214		2	723943	0.01	-0.03	-0.16			A_75_P01094072	2	722553
A_75_P01094273		2	724534	0.24	0.16	-0.44			A_75_P01094146	2	723288
A_75_P01094351		2	725306	-0.09	-0.11	0.04			A_75_P01094214	2	723943
A_75_P01094450		2	726317	-0.23	-0.21				A_75_P01094273	2	724534
A_75_P01094567		2	727443	-0.06	0.17	-0.06			A_75_P01094351	2	725306
A_75_P01094585		2	727647	-0.02	0.06	0.09			A_75_P01094450	2	726317
A_75_P01094618		2	728020	-0.12	-0.1	-0.35			A_75_P01094567	2	727443
A_75_P01094685		2	728723	-0.32	-0.38	0			A_75_P01094585	2	727647
A_75_P01094834		2	730242	-0.59	-0.67	-0.19			A_75_P01094618	2	728020
A_75_P01094940		2	731284	0.42	0.25	0.13			A_75_P01094685	2	728723
A_75_P01095008		2	731972	-0.08	0.06	-0.09			A_75_P01094834	2	730242
A_75_P01095113		2	733039	-0.03	-0.07	-0.09			A_75_P01094940	2	731284
A_75_P01095188		2	733774	0.16	0.1	0.24			A_75_P01095008	2	731972
A_75_P01095269		2	734570	0.25	0.23	-0.02			A_75_P01095113	2	733039
A_75_P01095371		2	735599	0.34	0.35	-0.13			A_75_P01095188	2	733774
A_75_P01095443		2	736352	0.06	0	-0.05			A_75_P01095269	2	734570
A_75_P01095543		2	737364	0.05	0.09	0.06			A_75_P01095371	2	735599
A_75_P01095563		2	737573	0.14	0.07	-0.05			A_75_P01095443	2	736352
A_75_P01095605		2	738044	-0.09	-0.12	0.03			A_75_P01095543	2	737364
A_75_P01095693		2	738932	0.24	0.35	-0.24			A_75_P01095563	2	737573
A_75_P01095775		2	739753	-0.22	-0.18	-0.2			A_75_P01095605	2	738044
A_75_P01095851		2	740529	0.39	0.29	-0.09			A_75_P01095693	2	738932
A_75_P01095950		2	741546	0.1	0.16	0.17			A_75_P01095775	2	739753
A_75_P01096049		2	742544	0.14	0.19	0.03			A_75_P01095851	2	740529
A_75_P01096125		2	743309	-0.36	-0.2	0.4			A_75_P01095950	2	741546
A_75_P01096257		2	744609	0.08	0.05	0.96			A_75_P01096049	2	742544
A_75_P01096316		2	745205	-0.07	-0.07				A_75_P01096125	2	743309
A_75_P01096407		2	746156	-0.14	-0.25	-0.16			A_75_P01096257	2	744609
A_75_P01096516		2	747230	0.24	0.18	-0.19			A_75_P01096316	2	745205
A_75_P01096631		2	748416	0.1	0.14	0.08			A_75_P01096407	2	746156
A_75_P01096648		2	748609	0.17	0.09	0.01			A_75_P01096516	2	747230
A_75_P01096714		2	749276	0.12	0.05				A_75_P01096631	2	748416
A_75_P01096795		2	750100	0.19	0.24	0.23			A_75_P01096648	2	748609
A_75_P01096888		2	751026	-0.4	0.04	-0.14			A_75_P01096714	2	749276
A_75_P01096981		2	751963	0.24	0.37	-0.07			A_75_P01096795	2	750100
A_75_P01097070		2	752872	0.21	0.27	-0.1			A_75_P01096888	2	751026
A_75_P01097148		2	753658	-0.21	-0.12	0.2			A_75_P01096981	2	751963
A_75_P01097219		2	754363	-0.06	-0.09	0.23			A_75_P01097070	2	752872
A_75_P01097292		2	755117	-0.27	-0.23	-0.18			A_75_P01097148	2	753658
A_75_P01097368		2	755943	-0.37	-0.54	0.15			A_75_P01097219	2	754363
A_75_P01097442		2	756682	-0.1	-0.19	-0.22			A_75_P01097292	2	755117
A_75_P01097533		2	757610	0.39	0.31	0.08			A_75_P01097368	2	755943
A_75_P01097617		2	758457	-0.27	-0.31	0.69			A_75_P01097442	2	756682
A_75_P01097635		2	758628	-0.37	0.17	-0.02			A_75_P01097533	2	757610
A_75_P01097694		2	759236	-0.04	-0.05	-0.1			A_75_P01097617	2	758457
A_75_P01097793		2	760230	-0.36	-0.33	0.42			A_75_P01097635	2	758628
A_75_P01097860		2	760907	-0.44	-0.04	-0.05			A_75_P01097694	2	759236
A_75_P01097955		2	761893	0.21	-0.03	-0.13			A_75_P01097793	2	760230
A_75_P01098034		2	762707	-0.27	0	-0.02			A_75_P01097860	2	760907
A_75_P01098144		2	763781	0.25	0.16	2.03			A_75_P01097955	2	761893
A_75_P01098237		2	764710	0.43	0.34				A_75_P01098034	2	762707
A_75_P01098318		2	765554	-0.2	-0.15	0.65			A_75_P01098144	2	763781
A_75_P01098401		2	766397	0.07	-0.04	-0.28			A_75_P01098237	2	764710
A_75_P01098481		2	767204	-0.01	0.07	0.11			A_75_P01098318	2	765554
A_75_P01098555		2	767937	0.15	0.01	-0.44			A_75_P01098401	2	766397
A_75_P01098620		2	768598	0.2	0.11	-0.12			A_75_P01098481	2	767204
A_75_P01098641		2	768815	0.04	0.01	0.18			A_75_P01098555	2	767937
A_75_P01098709		2	769482	0.11	-0.02	0.05			A_75_P01098620	2	768598
A_75_P01098798		2	770332	-0.23	0.05	-0.13			A_75_P01098641	2	768815
A_75_P01098879		2	771160	-0.03	0.1	-0.21			A_75_P01098709	2	769482
A_75_P01098960		2	771994	-0.1	-0.24				A_75_P01098798	2	770332
A_75_P01099058		2	772966	-0.14	-0.17	-0.12			A_75_P01098879	2	771160
A_75_P01099147		2	773834	-0.03	-0.02	0.19			A_75_P01098960	2	771994
A_75_P01099213		2	774522	-0.43	-0.51	-0.05			A_75_P01099058	2	772966
A_75_P01099304		2	775449	0.26	0.23	0.11			A_75_P01099147	2	773834
A_75_P01099419		2	776639	-0.25	-0.13	0.61			A_75_P01099213	2	774522
A_75_P01099514		2	777550	-0.01	0.09	-0.12			A_75_P01099304	2	775449
A_75_P01099610		2	778548	0.02	0.06	-0.35			A_75_P01099419	2	776639
A_75_P01099665		2	779106	-0.33	-0.26	-0.17			A_75_P01099514	2	777550
A_75_P01099700		2	779461	0.06	0.18	0.43			A_75_P01099610	2	778548
A_75_P01099754		2	779987	-0.24	0.14	0.1			A_75_P01099665	2	779106
A_75_P01099839		2	780884	-0.53	-0.41	-0.28			A_75_P01099700	2	779461
A_75_P01099928		2	781781	0.18	0.22	-0.13			A_75_P01099754	2	779987
A_75_P01100004		2	782555	-0.01	-0.13	0.17			A_75_P01099839	2	780884
A_75_P01100088		2	783463	-0.31	-0.12	-0.2			A_75_P01099928	2	781781
A_75_P01100222		2	784781	-0.33	-0.29	-0.22			A_75_P01100004	2	782555
A_75_P01100300		2	785574	-0.04	0.08	-0.1			A_75_P01100088	2	783463
A_75_P01100394		2	786499	0.3	0.22				A_75_P01100222	2	784781
A_75_P01100461		2	787168	-0.1	-0.25	-0.05			A_75_P01100300	2	785574
A_75_P01100536		2	787930	-0.27	-0.21	1.09			A_75_P01100394	2	786499
A_75_P01100637		2	788900	0.07	0.19	0.17			A_75_P01100461	2	787168
A_75_P01100726		2	789779	0.18	0.13	-0.11			A_75_P01100536	2	787930
A_75_P01100745		2	789959	-0.21	-0.02	-0.37			A_75_P01100637	2	788900
A_75_P01100792		2	790472	0.05	0.03	-0.09			A_75_P01100726	2	789779
A_75_P01100869		2	791291	-0.13	-0.14	0.53			A_75_P01100745	2	789959
A_75_P01100932		2	791974	-0.23	0	0.65			A_75_P01100792	2	790472
A_75_P01100997		2	792609	-0.11	0.03				A_75_P01100869	2	791291
A_75_P01101060		2	793335	-0.07	-0.11	-0.34			A_75_P01100932	2	791974
A_75_P01101144		2	794196	-0.21	-0.22	0.26			A_75_P01100997	2	792609
A_75_P01101244		2	795222	0.55	0.49	0.01			A_75_P01101060	2	793335
A_75_P01101361		2	796407	-0.16	-0.07	0.04			A_75_P01101144	2	794196
A_75_P01101438		2	797139	0.11	0.05				A_75_P01101244	2	795222
A_75_P01101513		2	797903	0.12	-0.05	0.08			A_75_P01101361	2	796407
A_75_P01101610		2	798832	0.08	0.06	0.16			A_75_P01101438	2	797139
A_75_P01101715		2	799905	0.05	-0.22	0.21			A_75_P01101513	2	797903
A_75_P01101746		2	800225	0.06	0.28	-0.02			A_75_P01101610	2	798832
A_75_P01101811		2	800872	-0.15	-0.22	-0.05			A_75_P01101715	2	799905
A_75_P01101907		2	801855	0.17	0.31	1.11			A_75_P01101746	2	800225
A_75_P01102012		2	802934	0	-0.17	0.89			A_75_P01101811	2	800872
A_75_P01102091		2	803689	-0.02	-0.14				A_75_P01101907	2	801855
A_75_P01102174		2	804601	0.15	0.06				A_75_P01102012	2	802934
A_75_P01102543		2	808296	0.16	0.26	0.34			A_75_P01102091	2	803689
A_75_P01103118		3	1147	0.39	0.36	0.09			A_75_P01102174	2	804601
A_75_P01103195		3	1930	0.14	0.05				A_75_P01102543	2	808296
A_75_P01103251		3	2502	-0.22	-0.03	0.08			A_75_P01103118	3	1147
A_75_P01103334		3	3347	0.26	0.34	-0.15			A_75_P01103195	3	1930
A_75_P01103421		3	4294	0.15	0.03	0.62			A_75_P01103251	3	2502
A_75_P01103535		3	5386	0.16	0.07	-0.64			A_75_P01103334	3	3347
A_75_P01103542		3	5444	-0.32	-0.4	-0.57			A_75_P01103421	3	4294
A_75_P01103837		3	8317	0.47	0.45	-0.26			A_75_P01103535	3	5386
A_75_P01103926		3	9230	-0.39	-0.38	-0.73			A_75_P01103542	3	5444
A_75_P01104398		3	13987	-0.14	-0.18	-0.18			A_75_P01103837	3	8317
A_75_P01104456		3	14595	-0.11	-0.06	0.14			A_75_P01103926	3	9230
A_75_P01104542		3	15480	-0.19	-0.09	0.04			A_75_P01104398	3	13987
A_75_P01104648		3	16495	0.25	0.26	0.13			A_75_P01104456	3	14595
A_75_P01104721		3	17226	0.2	0.1	0.29			A_75_P01104542	3	15480
A_75_P01104812		3	18101	0.31	0.28	0.84			A_75_P01104648	3	16495
A_75_P01104893		3	18949	-0.1	0.14	0.01			A_75_P01104721	3	17226
A_75_P01104994		3	19945	0.23	0.14	0.04			A_75_P01104812	3	18101
A_75_P01105099		3	20998	0.24	0.15	0.21			A_75_P01104893	3	18949
A_75_P01105190		3	21907	-0.06	-0.12	-0.24			A_75_P01104994	3	19945
A_75_P01105209		3	22093	-0.27	-0.4	-0.14			A_75_P01105099	3	20998
A_75_P01105282		3	22853	-0.05	-0.02	0.06			A_75_P01105190	3	21907
A_75_P01105363		3	23680	-0.6	-0.35	-0.1			A_75_P01105209	3	22093
A_75_P01105444		3	24565	-0.08	-0.21	-0.15			A_75_P01105282	3	22853
A_75_P01105533		3	25458	0.03	-0.08	0.04			A_75_P01105363	3	23680
A_75_P01105592		3	26066	-0.15	-0.11	0.08			A_75_P01105444	3	24565
A_75_P01105791		3	28043	-0.23	-0.31	-0.19			A_75_P01105533	3	25458
A_75_P01105871		3	28882	-0.16	-0.01	-0.19			A_75_P01105592	3	26066
A_75_P01105971		3	29841	-0.43	-0.17	0.09			A_75_P01105791	3	28043
A_75_P01106034		3	30473	-0.41	-0.36	-0.11			A_75_P01105871	3	28882
A_75_P01106091		3	31079	-0.15	-0.09	-0.07			A_75_P01105971	3	29841
A_75_P01106181		3	32012	-0.45	-0.58	0.79			A_75_P01106034	3	30473
A_75_P01106209		3	32290	-0.16	-0.18	-0.1			A_75_P01106091	3	31079
A_75_P01106283		3	33069	0.09	0.18	-0.19			A_75_P01106181	3	32012
A_75_P01106401		3	34211	-0.36	0.11	0.16			A_75_P01106209	3	32290
A_75_P01106486		3	35074	0.02	-0.06	0.15			A_75_P01106283	3	33069
A_75_P01106570		3	35887	-0.22	-0.23	0.12			A_75_P01106401	3	34211
A_75_P01106643		3	36621	-0.24	-0.12	0.03			A_75_P01106486	3	35074
A_75_P01106718		3	37398	0	0.01	0.03			A_75_P01106570	3	35887
A_75_P01106826		3	38503	0.54	0.52	-0.1			A_75_P01106643	3	36621
A_75_P01106896		3	39213	0.01	-0.21				A_75_P01106718	3	37398
A_75_P01106967		3	39932	0.21	0.13	-0.02			A_75_P01106826	3	38503
A_75_P01107055		3	40855	-0.7	-0.95	-0.3			A_75_P01106896	3	39213
A_75_P01107114		3	41451	-0.24	-0.25	0.42			A_75_P01106967	3	39932
A_75_P01107180		3	42128	-0.43	-0.31	0.92			A_75_P01107055	3	40855
A_75_P01107199		3	42323	-0.12	-0.33	-0.13			A_75_P01107114	3	41451
A_75_P01107288		3	43182	-0.05	-0.04				A_75_P01107180	3	42128
A_75_P01107369		3	44000	-0.1	-0.18	-0.19			A_75_P01107199	3	42323
A_75_P01107474		3	44997	0.05	-0.15	-0.14			A_75_P01107288	3	43182
A_75_P01107577		3	45992	-0.2	-0.28	0.05			A_75_P01107369	3	44000
A_75_P01107662		3	46845	-0.1	-0.25	-0.19			A_75_P01107474	3	44997
A_75_P01107732		3	47540	-0.19	-0.23	0.04			A_75_P01107577	3	45992
A_75_P01107795		3	48155	0.5	0.39	0.01			A_75_P01107662	3	46845
A_75_P01107859		3	48792	-0.16	-0.31				A_75_P01107732	3	47540
A_75_P01107928		3	49523	-0.02	0.1	0.16			A_75_P01107795	3	48155
A_75_P01107990		3	50205	0.42	0.3	1.15			A_75_P01107859	3	48792
A_75_P01108079		3	51111	-0.32	-0.16	-0.22			A_75_P01107928	3	49523
A_75_P01108161		3	51975	0.06	0.01	-0.01			A_75_P01107990	3	50205
A_75_P01108196		3	52334	0.25	0.25	-0.13			A_75_P01108079	3	51111
A_75_P01108243		3	52814	-0.12	-0.22	-0.19			A_75_P01108161	3	51975
A_75_P01108328		3	53720	0.14	0.12	-0.12			A_75_P01108196	3	52334
A_75_P01108405		3	54512	-0.41	-0.43	0.53			A_75_P01108243	3	52814
A_75_P01108466		3	55163	0.21	0.06	0.17			A_75_P01108328	3	53720
A_75_P01108539		3	55895	0.11	0.18	-0.23			A_75_P01108405	3	54512
A_75_P01108607		3	56575	-0.11	-0.21				A_75_P01108466	3	55163
A_75_P01108686		3	57326	0.09	0.1				A_75_P01108539	3	55895
A_75_P01108775		3	58230	0.39	0.37	-0.1			A_75_P01108607	3	56575
A_75_P01108841		3	58915	-0.19	-0.3	0.05			A_75_P01108686	3	57326
A_75_P01108910		3	59689	0.11	0.11	-0.32			A_75_P01108775	3	58230
A_75_P01108982		3	60418	0.17	0.21	0.45			A_75_P01108841	3	58915
A_75_P01109091		3	61567	0.18	0.21	-0.1			A_75_P01108910	3	59689
A_75_P01109109		3	61750	-0.05	0	-0.05			A_75_P01108982	3	60418
A_75_P01109170		3	62421	0.38	0.43	-0.14			A_75_P01109091	3	61567
A_75_P01109250		3	63248	0.2	0.3				A_75_P01109109	3	61750
A_75_P01109317		3	63956	0.42	0.3	0.14			A_75_P01109170	3	62421
A_75_P01109420		3	64924	0.15	0.12	0.41			A_75_P01109250	3	63248
A_75_P01109504		3	65769	-0.25	-0.08	-0.35			A_75_P01109317	3	63956
A_75_P01109588		3	66615	0.22	0.24	-0.11			A_75_P01109420	3	64924
A_75_P01109656		3	67323	0.37	0.44				A_75_P01109504	3	65769
A_75_P01109744		3	68259	0.21	-0.07	0.14			A_75_P01109588	3	66615
A_75_P01109808		3	68948	0.37	0.22	0.23			A_75_P01109656	3	67323
A_75_P01109878		3	69687	-0.4	-0.01	0.41			A_75_P01109744	3	68259
A_75_P01109947		3	70418	0	-0.08	-0.15			A_75_P01109808	3	68948
A_75_P01110016		3	71144	-0.02	-0.07	-0.11			A_75_P01109878	3	69687
A_75_P01110043		3	71433	0.14	0.04	0.12			A_75_P01109947	3	70418
A_75_P01110105		3	72030	-0.06	0.13	-0.17			A_75_P01110016	3	71144
A_75_P01110189		3	72902	0.03	-0.06	-0.01			A_75_P01110043	3	71433
A_75_P01110290		3	73935	-0.18	-0.09				A_75_P01110105	3	72030
A_75_P01110405		3	75142	-0.07	-0.01	0.9			A_75_P01110189	3	72902
A_75_P01110463		3	75758	-0.16	-0.3				A_75_P01110290	3	73935
A_75_P01110547		3	76615	0.36	0.23	-0.05			A_75_P01110405	3	75142
A_75_P01110619		3	77337	0.13	0.2	0.07			A_75_P01110463	3	75758
A_75_P01110696		3	78129	0.2	0.24	0.16			A_75_P01110547	3	76615
A_75_P01110744		3	78652	-0.19	-0.25	0.33			A_75_P01110619	3	77337
A_75_P01110809		3	79361	0	0.28	0.03			A_75_P01110696	3	78129
A_75_P01110893		3	80218	0.01	-0.07	0.02			A_75_P01110744	3	78652
A_75_P01110974		3	80977	0.27	0.21	-0.04			A_75_P01110809	3	79361
A_75_P01110997		3	81214	0.37	0.28	0.16			A_75_P01110893	3	80218
A_75_P01111044		3	81721	0.27	0.23	0.08			A_75_P01110974	3	80977
A_75_P01111141		3	82646	-0.02	-0.09	0.24			A_75_P01110997	3	81214
A_75_P01111231		3	83515	-0.23	-0.24	0.02			A_75_P01111044	3	81721
A_75_P01111306		3	84263	0.71	0.59	0.57			A_75_P01111141	3	82646
A_75_P01111937		3	90734	0.43	0.29	-0.17			A_75_P01111231	3	83515
A_75_P01112020		3	91614	0.4	0.35	-0.87			A_75_P01111306	3	84263
A_75_P01112112		3	92609	-0.04	-0.06	-0.47			A_75_P01111937	3	90734
A_75_P01112181		3	93305	0.09	0.2	0.13			A_75_P01112020	3	91614
A_75_P01112272		3	94234	0.21	0.29				A_75_P01112112	3	92609
A_75_P01112374		3	95241	0.36	0.28	-0.02			A_75_P01112181	3	93305
A_75_P01112470		3	96134	0.24	0.16	0.09			A_75_P01112272	3	94234
A_75_P01112545		3	96924	-0.1	-0.16	0.48			A_75_P01112374	3	95241
A_75_P01112567		3	97133	-0.39	-0.36	0.19			A_75_P01112470	3	96134
A_75_P01112642		3	97849	0.15	0.36	-0.12			A_75_P01112545	3	96924
A_75_P01112734		3	98821	-0.06	-0.08	0.13			A_75_P01112567	3	97133
A_75_P01112801		3	99574	0.06	0.1	-0.2			A_75_P01112642	3	97849
A_75_P01112853		3	100139	0.27	0.15	-0.02			A_75_P01112734	3	98821
A_75_P01112918		3	100810	0.28	0.2	0.41			A_75_P01112801	3	99574
A_75_P01112994		3	101620	-0.11	0.13	0.08			A_75_P01112853	3	100139
A_75_P01113077		3	102488	0.18	0.29	-0.02			A_75_P01112918	3	100810
A_75_P01113169		3	103361	-0.05	0.07	0			A_75_P01112994	3	101620
A_75_P01113216		3	103865	0.32	0.23	-0.27			A_75_P01113077	3	102488
A_75_P01113309		3	104848	0.25	0.16	0.04			A_75_P01113169	3	103361
A_75_P01113379		3	105615	-0.19	-0.12	0.34			A_75_P01113216	3	103865
A_75_P01113457		3	106518	-0.01	0.04	-0.21			A_75_P01113309	3	104848
A_75_P01113479		3	106724	0.04	0.15	-0.11			A_75_P01113379	3	105615
A_75_P01113522		3	107177	0.3	0.21	0.1			A_75_P01113457	3	106518
A_75_P01113624		3	108187	0.32	0.22	-0.11			A_75_P01113479	3	106724
A_75_P01113697		3	108925	-0.14	-0.23	-0.27			A_75_P01113522	3	107177
A_75_P01113804		3	109988	-0.08	0.03	-0.09			A_75_P01113624	3	108187
A_75_P01113880		3	110763	0.12	0.3	-0.01			A_75_P01113697	3	108925
A_75_P01113955		3	111492	-0.87	0.4	0.1			A_75_P01113804	3	109988
A_75_P01114033		3	112264	0.43	0.38	0.11			A_75_P01113880	3	110763
A_75_P01114106		3	112969	-0.35	-0.33	-0.3			A_75_P01113955	3	111492
A_75_P01114172		3	113652	-0.42	-0.32	-0.05			A_75_P01114033	3	112264
A_75_P01114244		3	114378	-0.47	-0.29	0.19			A_75_P01114106	3	112969
A_75_P01114316		3	115089	-0.37	-0.39	-0.22			A_75_P01114172	3	113652
A_75_P01114382		3	115758	-0.19	-0.17	0.13			A_75_P01114244	3	114378
A_75_P01114413		3	116072	-0.08	-0.1				A_75_P01114316	3	115089
A_75_P01114490		3	116815	0.18	0.1	-0.01			A_75_P01114382	3	115758
A_75_P01114546		3	117391	0.25	0.17	0.07			A_75_P01114413	3	116072
A_75_P01114623		3	118244	-0.31	-0.1	0.27			A_75_P01114490	3	116815
A_75_P01114717		3	119153	-0.01	0.03	1.84			A_75_P01114546	3	117391
A_75_P01114786		3	119851	-0.13	0.12	-0.22			A_75_P01114623	3	118244
A_75_P01114843		3	120442	-0.15	-0.3				A_75_P01114717	3	119153
A_75_P01114910		3	121095	0.17	-0.05	-0.17			A_75_P01114786	3	119851
A_75_P01115013		3	122159	0.07	0.01	-0.14			A_75_P01114843	3	120442
A_75_P01115158		3	123705	-0.2	0	-0.04			A_75_P01114910	3	121095
A_75_P01115259		3	124738	0.07	0.12	0.05			A_75_P01115013	3	122159
A_75_P01115349		3	125685	-0.24	-0.08	-0.14			A_75_P01115158	3	123705
A_75_P01115398		3	126201	-0.08	-0.15				A_75_P01115259	3	124738
A_75_P01115459		3	126756	-0.08	-0.14	0.48			A_75_P01115349	3	125685
A_75_P01115519		3	127381	-0.19	-0.2	0.05			A_75_P01115398	3	126201
A_75_P01115580		3	127991	0.02	-0.04	-0.31			A_75_P01115459	3	126756
A_75_P01115705		3	129186	-0.25	0.04	0.05			A_75_P01115519	3	127381
A_75_P01115780		3	129861	0.16	0.09	0.18			A_75_P01115580	3	127991
A_75_P01115850		3	130591	-0.48	-0.52	0			A_75_P01115705	3	129186
A_75_P01115938		3	131443	0.18	0.21	-0.12			A_75_P01115780	3	129861
A_75_P01115999		3	132071	-0.02	-0.12	-0.03			A_75_P01115850	3	130591
A_75_P01116081		3	132942	0.06	0.06	0.06			A_75_P01115938	3	131443
A_75_P01116177		3	133917	-0.18	-0.26				A_75_P01115999	3	132071
A_75_P01116257		3	134730	-0.16	-0.03	0.47			A_75_P01116081	3	132942
A_75_P01116330		3	135447	-0.18	-0.14	0.26			A_75_P01116177	3	133917
A_75_P01116348		3	135630	0.37	0.23	-0.08			A_75_P01116257	3	134730
A_75_P01116400		3	136178	-0.22	0.4	0.05			A_75_P01116330	3	135447
A_75_P01116483		3	136963	0.08	-0.08	0.06			A_75_P01116348	3	135630
A_75_P01116582		3	137957	0.08	0.12	0.04			A_75_P01116400	3	136178
A_75_P01116653		3	138683	-0.06	-0.14	-0.23			A_75_P01116483	3	136963
A_75_P01116726		3	139416	0.08	-0.07	0.22			A_75_P01116582	3	137957
A_75_P01116814		3	140293	0.32	0.2	0.24			A_75_P01116653	3	138683
A_75_P01116888		3	141007	-0.25	-0.14	0			A_75_P01116726	3	139416
A_75_P01116963		3	141759	-0.06	-0.12	0.25			A_75_P01116814	3	140293
A_75_P01117045		3	142584	-0.29	-0.18	0.34			A_75_P01116888	3	141007
A_75_P01117131		3	143416	-0.22	-0.02	0.1			A_75_P01116963	3	141759
A_75_P01117200		3	144122	-0.11	-0.07	0.15			A_75_P01117045	3	142584
A_75_P01117287		3	145005	0.12	0.15	-0.32			A_75_P01117131	3	143416
A_75_P01117326		3	145410	0.07	0.24	-0.02			A_75_P01117200	3	144122
A_75_P01117398		3	146164	0.06	-0.02	1.91			A_75_P01117287	3	145005
A_75_P01117477		3	146928	-0.39	-0.45	0.46			A_75_P01117326	3	145410
A_75_P01117565		3	147834	-0.08	-0.11	-0.03			A_75_P01117398	3	146164
A_75_P01117624		3	148437	0.18	0.21	0.05			A_75_P01117477	3	146928
A_75_P01117798		3	150149						A_75_P01117565	3	147834
A_75_P01117974		3	151975	-0.21	-0.13	1.86			A_75_P01117624	3	148437
A_75_P01118051		3	152726	-0.06	0	1.78			A_75_P01117712	3	149296
A_75_P01118123		3	153447	0.1	0				A_75_P01117798	3	150149
A_75_P01118200		3	154253	-0.06	-0.04	1.6			A_75_P01117873	3	150927
A_75_P01118270		3	154981	-0.11	0.08	1.36			A_75_P01117974	3	151975
A_75_P01118293		3	155203	-0.56	-0.5	2.43			A_75_P01118051	3	152726
A_75_P01118340		3	155689	-0.57	-0.27	1.71			A_75_P01118123	3	153447
A_75_P01118413		3	156421	0.28	0.19	1.54			A_75_P01118200	3	154253
A_75_P01118476		3	157049	-0.23	-0.23	1.62			A_75_P01118270	3	154981
A_75_P01118553		3	157799	0.2	0.18	1.77			A_75_P01118293	3	155203
A_75_P01118627		3	158518	-0.39	-0.31	1.65			A_75_P01118340	3	155689
A_75_P01118713		3	159393	-0.19	-0.14	1.4			A_75_P01118413	3	156421
A_75_P01118790		3	160179	0.17	0.11	1.76			A_75_P01118476	3	157049
A_75_P01118854		3	160856	0.32	0.22	1.51			A_75_P01118553	3	157799
A_75_P01118940		3	161748	-0.19	-0.17				A_75_P01118627	3	158518
A_75_P01119030		3	162624	-0.13	-0.07	1.71			A_75_P01118713	3	159393
A_75_P01119115		3	163425	0.24	0.27	1.67			A_75_P01118790	3	160179
A_75_P01119238		3	164722	0.41	0.31				A_75_P01118854	3	160856
A_75_P01119265		3	164984	0.09	0.15	1.66			A_75_P01118940	3	161748
A_75_P01119321		3	165572	-0.15	-0.26				A_75_P01119030	3	162624
A_75_P01119390		3	166299	-0.11	-0.17	1.39			A_75_P01119115	3	163425
A_75_P01119503		3	167446	0.16	0.27	1.72			A_75_P01119238	3	164722
A_75_P01119580		3	168195	0.04	0.03	1.55			A_75_P01119265	3	164984
A_75_P01119654		3	168899	0.67	0.82	0.05			A_75_P01119321	3	165572
A_75_P01119754		3	169881	0.36	0.27				A_75_P01119390	3	166299
A_75_P01119820		3	170552	-0.36	-0.63	-0.27			A_75_P01119503	3	167446
A_75_P01119907		3	171396	0.06	-0.05	0.1			A_75_P01119580	3	168195
A_75_P01119981		3	172136	0.01	0.03	-0.27			A_75_P01119654	3	168899
A_75_P01120070		3	173007	-0.16	-0.06	0			A_75_P01119754	3	169881
A_75_P01120137		3	173691	0.03	-0.07	-0.02			A_75_P01119820	3	170552
A_75_P01120245		3	174790	0.35	0.3	0.23			A_75_P01119907	3	171396
A_75_P01120264		3	174994	0.13	0.32	0.35			A_75_P01119981	3	172136
A_75_P01120332		3	175642	0	-0.09	-0.14			A_75_P01120070	3	173007
A_75_P01120411		3	176424	-0.02	-0.13	0.29			A_75_P01120137	3	173691
A_75_P01120500		3	177284	-0.42	-0.29	0.29			A_75_P01120245	3	174790
A_75_P01120570		3	178005	-0.34	-0.39	-0.06			A_75_P01120264	3	174994
A_75_P01120660		3	178907	-0.19	-0.08	-0.04			A_75_P01120332	3	175642
A_75_P01120746		3	179713	0.1	0.01	-0.16			A_75_P01120411	3	176424
A_75_P01120829		3	180601	-0.22	-0.28	-0.39			A_75_P01120500	3	177284
A_75_P01120932		3	181586	-0.41	-0.35	0			A_75_P01120570	3	178005
A_75_P01121020		3	182478	-0.21	-0.21	-0.03			A_75_P01120660	3	178907
A_75_P01121120		3	183445	0.05	-0.04	-0.3			A_75_P01120746	3	179713
A_75_P01121218		3	184430	0.28	0.3	0.51			A_75_P01120829	3	180601
A_75_P01121284		3	185128	0.26	0.21	0.28			A_75_P01120932	3	181586
A_75_P01121307		3	185354	-0.02	-0.01	-0.12			A_75_P01121020	3	182478
A_75_P01121347		3	185761	0.02	0.13	-0.17			A_75_P01121120	3	183445
A_75_P01121414		3	186411	0.1	0.2	-0.06			A_75_P01121218	3	184430
A_75_P01121481		3	187102	0.1	0.12	0.08			A_75_P01121284	3	185128
A_75_P01121570		3	187956	0.29	0.31	0.95			A_75_P01121307	3	185354
[truncated: 13,656 more rows]

## Sheet: 2390_CLACRegionMean
Gene/Clone ID	Gene/Clone Name	Chromosome Number	Nucleotide Position	Consensus Count	Consensus FDR	1a wt #3 vs PSL2
[truncated: 15,162 more rows]

[truncated: 2 more sheets: 2390_CLACAverageSmooth, 2390_CLACReport]
